# Supplementary material for: Genome-wide mapping of native co-localized G4s and R-loops in living cells
Source: eLife journal article supplement (doi:10.7554/elife.99026), 2024-07-23
Supplement: fig1-figsupp1-data1 [file elife-99026-fig1-figsupp1-data1-v1.pdf]

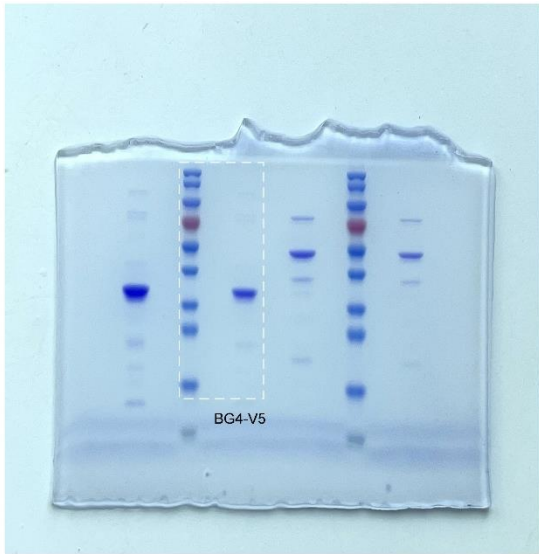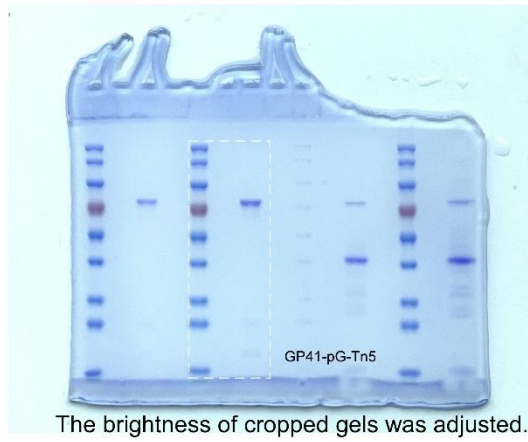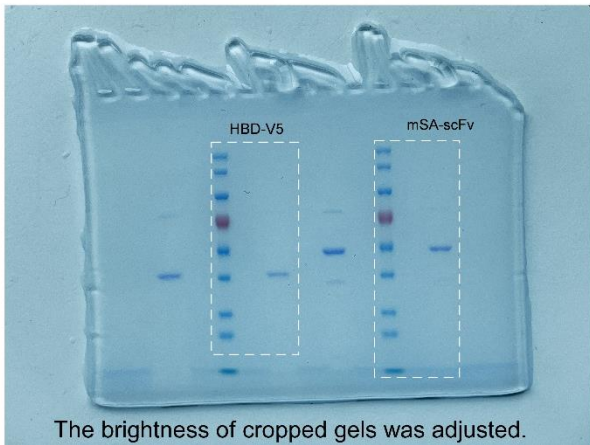

**Figure 1-figure supplement 1-source data 1.**

Original images corresponding to Figure 1-figure supplement 1 A. The selected regions were labeled using white dash line.
