# Supplementary material for: Genome-wide mapping of native co-localized G4s and R-loops in living cells
Source: eLife journal article supplement (doi:10.7554/elife.99026), 2024-07-23
Supplement: fig8-data1 [file elife-99026-fig8-data1-v1.pdf]

**Figure 8 B**

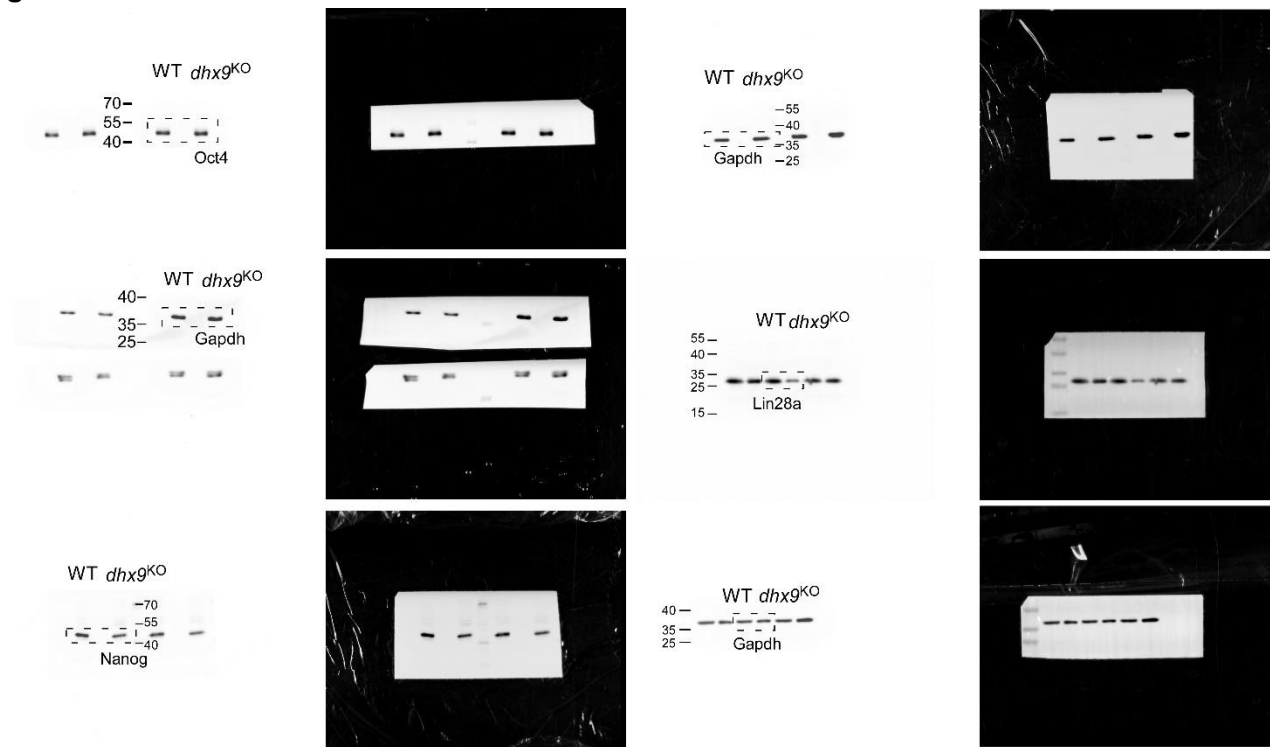

**Figure 8 C**

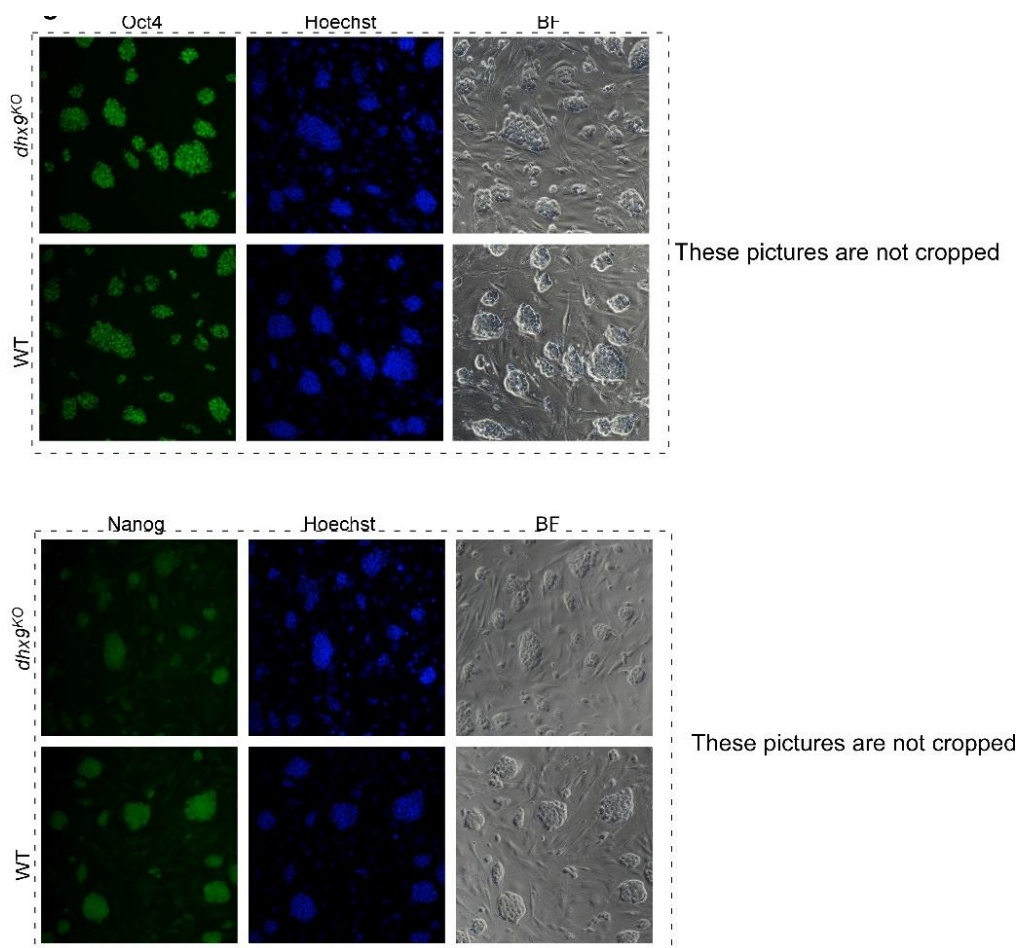

**Figure 8 F**

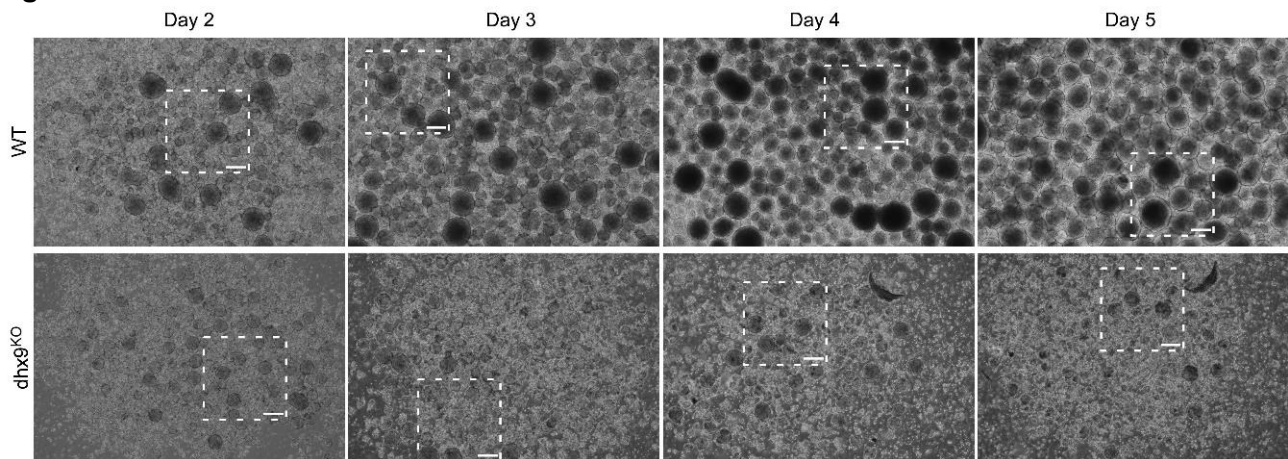

**Figure 8-source data 1.**

Original western blot corresponding to Figure 8 B. The selected regions were labeled using black dash line. The pictures on the right are western blot merged with membrane pictures.

Original images corresponding to Figure 8 C. All images were not cropped.

Original images corresponding to Figure 8 F. The selected regions were labeled using white dash line.
