# Supplementary material for: Genome-wide mapping of native co-localized G4s and R-loops in living cells
Source: eLife. 2024 Oct 11;13:RP99026. doi: 10.7554/eLife.99026 (PMC11469684; doi:10.7554/eLife.99026)
Supplement: Supplementary file 1. — (a) HepG4-seq peaks in HEK293 cells (b) Merged HepG4-seq peaks in HEK293 cells treated with DMSO, ML216, NSC617145 (c) HBD-seq peaks in HEK293 cells (d) Co-localized G4 and R-loop peaks in HEK293 cells € Co-localized G4 and R-loop peaks-associated genes with differential expression after treatment with G4 Inhibitor. [file elife-99026-supp1.xlsx]

## Sheet: Cover
Supplementary Table1: G4 and R-loop peaks in HEK293 cells
Supplementary Table 1a: HepG4-seq peaks in HEK293 cells
Supplementary Table 1b: Merged HepG4-seq peaks in HEK293 cells treated with DMSO, ML216, NSC617145
Supplementary Table 1c: HBD-seq peaks in HEK293 cells
Supplementary Table 1d: Co-localized G4 and R-loop peaks in HEK293 cells
Supplementary Table 1e: Co-localized G4 and R-loop peaks-associated genes with differential expression after treatment with G4 Inhibitor

## Sheet: Supplementary Table 1a
Chr	Start	End
chr1	910941	912144
chr1	918742	919835
chr1	923341	924230
chr1	924350	925284
chr1	935562	936146
chr1	936190	936844
chr1	938004	938841
chr1	939065	939747
chr1	940719	941400
chr1	941568	942144
chr1	942187	942936
chr1	957327	958524
chr1	960389	961711
chr1	963718	964450
chr1	967647	968770
chr1	996568	997400
chr1	997506	998136
chr1	998239	999463
chr1	999867	1001419
chr1	1019241	1019793
chr1	1019862	1020526
chr1	1039909	1040813
chr1	1067868	1068556
chr1	1079318	1080483
chr1	1082241	1082937
chr1	1115785	1116579
chr1	1125089	1126223
chr1	1164320	1165094
chr1	1203141	1204182
chr1	1211668	1213112
chr1	1231555	1232764
chr1	1245756	1247086
chr1	1273556	1274953
chr1	1292832	1294153
chr1	1305723	1306764
chr1	1306878	1308098
chr1	1309965	1310954
chr1	1312157	1313026
chr1	1320353	1321330
chr1	1324215	1325393
chr1	1332374	1333109
chr1	1335746	1336742
chr1	1337192	1337991
chr1	1342752	1343667
chr1	1344729	1345488
chr1	1345495	1346171
chr1	1348783	1350046
chr1	1358000	1359211
chr1	1370439	1371336
chr1	1371477	1372809
chr1	1375046	1375768
chr1	1398720	1400025
chr1	1425961	1427138
chr1	1435112	1435998
chr1	1440682	1441607
chr1	1490597	1491440
chr1	1511485	1512361
chr1	1535682	1537454
chr1	1538084	1538844
chr1	1539155	1539873
chr1	1574587	1575338
chr1	1600827	1601577
chr1	1615006	1616578
chr1	1627100	1627754
chr1	1724014	1724834
chr1	1752838	1753856
chr1	1777870	1778835
chr1	1890664	1891498
chr1	1908153	1909434
chr1	1919139	1920174
chr1	1925471	1926074
chr1	1926372	1927094
chr1	1928901	1930143
chr1	1986060	1987184
chr1	2049226	2049987
chr1	2050038	2051549
chr1	2133070	2133882
chr1	2160159	2161107
chr1	2204354	2205603
chr1	2211954	2213117
chr1	2226880	2228377
chr1	2229713	2230355
chr1	2230732	2231458
chr1	2239896	2240825
chr1	2242812	2243773
chr1	2272323	2273612
chr1	2288292	2289006
chr1	2289596	2290319
chr1	2301656	2303110
chr1	2310819	2311457
chr1	2312015	2312695
chr1	2314736	2315653
chr1	2320575	2321626
chr1	2391271	2392127
chr1	2412144	2413013
chr1	2413563	2414297
chr1	2446603	2447818
chr1	2800288	2801075
chr1	2899346	2900364
chr1	3027427	3028735
chr1	3030000	3031122
chr1	3067476	3068275
chr1	3105727	3106552
chr1	3222164	3222864
chr1	3276990	3278140
chr1	3374044	3375168
chr1	3393511	3394579
chr1	3402945	3404111
chr1	3410251	3411424
chr1	3466296	3467624
chr1	3530741	3531724
chr1	3623762	3625188
chr1	3671191	3672330
chr1	3727442	3728589
chr1	3772795	3774188
chr1	3777768	3778718
chr1	3899076	3900178
chr1	3900253	3901890
chr1	3911412	3912496
chr1	3976951	3977746
chr1	5658400	5659655
chr1	5660484	5661974
chr1	5874418	5875817
chr1	5908696	5909832
chr1	5991826	5992740
chr1	6069829	6071029
chr1	6076483	6077314
chr1	6097606	6098501
chr1	6111654	6112820
chr1	6123704	6124868
chr1	6170062	6171178
chr1	6183188	6184243
chr1	6235183	6236403
chr1	6245748	6246553
chr1	6385862	6387217
chr1	6392968	6393936
chr1	6420085	6421506
chr1	6484177	6485032
chr1	6602335	6603635
chr1	6613245	6613812
chr1	6614028	6614682
chr1	6784890	6786235
chr1	6962225	6962870
chr1	6963090	6963683
chr1	7534311	7534950
chr1	7704038	7705101
chr1	7783613	7784917
chr1	7865546	7866639
chr1	7961255	7961984
chr1	8025993	8026752
chr1	8423633	8424339
chr1	8702938	8703844
chr1	8826616	8828036
chr1	8878516	8879518
chr1	9129249	9130043
chr1	9234191	9235430
chr1	9292871	9294150
chr1	9588167	9589146
chr1	9730756	9731893
chr1	9909489	9910864
chr1	10032360	10033159
chr1	10033195	10033897
chr1	10209601	10210212
chr1	10210755	10211489
chr1	10398367	10399578
chr1	10628860	10629502
chr1	10629905	10630470
chr1	10642891	10643584
chr1	11059327	11059981
chr1	11648284	11649218
chr1	11805229	11806445
chr1	11908297	11909404
chr1	11979873	11980659
chr1	12019237	12020288
chr1	13748936	13749695
chr1	15523825	15525141
chr1	15584413	15585432
chr1	15616712	15618021
chr1	15834740	15836353
chr1	15847288	15848161
chr1	15933815	15934935
chr1	15944091	15944967
chr1	16017215	16018058
chr1	16078655	16079705
chr1	16149747	16150714
chr1	16366772	16367436
chr1	16498882	16499758
chr1	16613210	16614372
chr1	17011144	17012240
chr1	17194154	17195146
chr1	17565387	17566490
chr1	17633449	17634468
chr1	18143452	18144839
chr1	18954554	18955278
chr1	18956190	18957156
chr1	19209925	19210698
chr1	19484938	19485526
chr1	19485610	19486214
chr1	20355628	20356362
chr1	20633277	20634182
chr1	20660989	20662100
chr1	21176438	21177524
chr1	21334382	21335826
chr1	21338231	21339172
chr1	21599006	21599881
chr1	22052134	22052991
chr1	22142248	22142856
chr1	22142978	22143601
chr1	22551806	22552909
chr1	22563616	22564306
chr1	23019084	23020140
chr1	23198749	23199468
chr1	23216696	23217817
chr1	23367800	23368461
chr1	23368710	23369427
chr1	23483824	23484910
chr1	23530731	23531824
chr1	23556259	23557338
chr1	23557520	23558809
chr1	23799640	23800240
chr1	23800504	23801158
chr1	23979918	23980750
chr1	24502088	24502941
chr1	24642871	24643619
chr1	24848075	24849024
chr1	24905456	24906481
chr1	24930520	24931426
chr1	25195006	25196293
chr1	25239432	25240311
chr1	25338218	25339053
chr1	25772134	25772930
chr1	25819726	25820451
chr1	25906292	25907283
chr1	25908895	25909850
chr1	26021286	26022155
chr1	26111223	26111907
chr1	26111962	26112708
chr1	26233556	26234765
chr1	26471371	26471944
chr1	26472403	26473324
chr1	26500103	26501270
chr1	26695169	26696103
chr1	26697672	26698583
chr1	26787499	26788293
chr1	26864860	26865678
chr1	27321874	27322459
chr1	27365465	27366869
chr1	27489647	27490772
chr1	27592658	27593936
chr1	27725375	27726617
chr1	27773076	27774589
chr1	27862924	27863725
chr1	28088311	28089205
chr1	28505354	28506108
chr1	28668517	28669353
chr1	28736134	28737125
chr1	28877051	28877945
chr1	28881962	28882852
chr1	29180991	29181582
chr1	29181735	29182412
chr1	29282894	29284001
chr1	30692079	30692794
chr1	30718576	30719894
chr1	31151165	31152550
chr1	31296361	31297363
chr1	31324197	31325130
chr1	31413033	31413760
chr1	31413810	31414408
chr1	31813794	31814691
chr1	31815607	31816400
chr1	32013151	32014016
chr1	32014119	32014763
chr1	32179380	32180148
chr1	32275784	32276957
chr1	32338089	32339073
chr1	32351054	32352141
chr1	32650688	32651691
chr1	32741435	32742318
chr1	32753435	32754192
chr1	32770761	32771733
chr1	32817181	32817776
chr1	32817785	32818485
chr1	32885781	32886391
chr1	32886459	32886977
chr1	33150413	33151556
chr1	33255443	33256239
chr1	33256347	33257329
chr1	33472169	33472874
chr1	33974500	33975446
chr1	35031486	35032220
chr1	35191859	35192684
chr1	35556986	35557994
chr1	35565199	35566212
chr1	35769053	35770308
chr1	35882619	35883885
chr1	36088286	36089313
chr1	36125034	36125842
chr1	36149159	36149960
chr1	36155722	36156272
chr1	36156429	36157255
chr1	36223924	36224835
chr1	37613326	37614706
chr1	37690039	37691034
chr1	37691990	37692827
chr1	37793650	37794660
chr1	37931066	37932366
chr1	38012236	38013263
chr1	38045752	38047242
chr1	38047643	38048288
chr1	38115571	38116424
chr1	38607994	38608792
chr1	38859398	38860351
chr1	38991185	38992035
chr1	39104992	39105931
chr1	39408113	39409457
chr1	39491366	39492136
chr1	39900719	39901928
chr1	40373379	40374819
chr1	40449765	40450826
chr1	40979072	40980333
chr1	41019871	41020744
chr1	41360795	41361649
chr1	41370740	41371482
chr1	41382017	41383167
chr1	41530540	41531240
chr1	42035313	42036311
chr1	42380021	42380573
chr1	42380736	42381366
chr1	42958273	42959408
chr1	43367580	43368675
chr1	43649654	43650521
chr1	43706758	43708190
chr1	43946147	43947429
chr1	43969557	43970444
chr1	43974715	43975703
chr1	43978355	43979099
chr1	44631254	44632572
chr1	44673848	44674879
chr1	44707734	44708428
chr1	44721371	44722108
chr1	44730485	44731327
chr1	44787434	44788468
chr1	44819443	44820679
chr1	44841696	44842319
chr1	44842604	44843286
chr1	45008554	45009900
chr1	45010180	45011125
chr1	45303238	45304332
chr1	45331963	45333053
chr1	45490718	45491727
chr1	45550452	45551348
chr1	45803169	45803822
chr1	46031029	46032244
chr1	46132283	46132949
chr1	46197952	46198719
chr1	46223377	46224324
chr1	46246028	46246714
chr1	46246890	46247945
chr1	46301523	46302129
chr1	46302478	46303442
chr1	46466708	46467332
chr1	46467523	46468152
chr1	46718591	46719441
chr1	47313822	47314526
chr1	47333452	47334522
chr1	47491579	47492617
chr1	47771465	47772293
chr1	47780182	47781641
chr1	47997328	47998032
chr1	50023314	50024436
chr1	50977659	50978495
chr1	51616830	51618067
chr1	52141545	52142721
chr1	52365827	52366936
chr1	52726116	52726974
chr1	52842542	52843457
chr1	52921039	52922089
chr1	53096658	53097422
chr1	53539322	53540247
chr1	53573115	53574560
chr1	53687777	53688597
chr1	53694460	53696034
chr1	53737606	53738500
chr1	53837919	53838895
chr1	54053045	54054191
chr1	54228815	54229899
chr1	54253656	54254735
chr1	54265415	54266158
chr1	54354718	54355795
chr1	54406010	54407034
chr1	54488163	54488835
chr1	54541879	54542595
chr1	54764141	54764797
chr1	54855865	54856552
chr1	54887792	54888654
chr1	55214169	55215540
chr1	56644773	56645821
chr1	56963833	56964618
chr1	58778966	58779672
chr1	58779871	58780481
chr1	58780831	58781952
chr1	58782927	58783672
chr1	58785590	58786432
chr1	62314562	62315483
chr1	62435976	62437083
chr1	63322052	63322895
chr1	63323426	63324867
chr1	63366902	63368126
chr1	63523034	63523770
chr1	64744567	64745423
chr1	65002244	65003072
chr1	65147376	65148395
chr1	65254111	65255000
chr1	65419626	65421151
chr1	66924519	66925504
chr1	67684754	67685786
chr1	67686287	67687107
chr1	67832998	67833878
chr1	70410321	70411394
chr1	75724126	75725127
chr1	75785740	75786627
chr1	77978127	77979621
chr1	81175091	81175952
chr1	81800949	81802240
chr1	83802662	83803880
chr1	84506013	84507017
chr1	85200294	85201720
chr1	85276126	85276909
chr1	85340243	85341303
chr1	85580411	85581706
chr1	85587792	85588908
chr1	86913991	86915046
chr1	87641929	87643219
chr1	88992191	88993296
chr1	89524222	89525671
chr1	89994661	89995608
chr1	91404300	91404990
chr1	91885935	91886908
chr1	92409958	92410634
chr1	92485189	92486299
chr1	92784353	92785355
chr1	93180260	93180931
chr1	93846203	93846911
chr1	93847045	93847792
chr1	93909250	93909878
chr1	94417809	94418655
chr1	94925969	94927509
chr1	95233768	95234518
chr1	98045068	98045926
chr1	100132455	100133221
chr1	100895375	100896289
chr1	102205152	102206047
chr1	103525186	103526095
chr1	108746134	108746809
chr1	108746877	108747578
chr1	108962910	108963717
chr1	109041340	109042751
chr1	109213273	109214269
chr1	109248723	109249933
chr1	109269811	109270709
chr1	109282894	109283789
chr1	109397464	109398440
chr1	109483270	109483821
chr1	109483852	109484411
chr1	110209950	110211194
chr1	110338082	110339956
chr1	111139569	111140904
chr1	111199884	111200957
chr1	111285528	111286226
chr1	111443156	111444128
chr1	111507667	111508629
chr1	111587934	111588576
chr1	111619498	111620523
chr1	111848861	111849722
chr1	112619118	112620013
chr1	112706288	112707655
chr1	112714942	112716316
chr1	112743744	112744650
chr1	112893533	112894817
chr1	113390444	113391451
chr1	113812084	113812767
chr1	113904681	113905574
chr1	114152518	114153215
chr1	114669576	114670431
chr1	114716138	114716986
chr1	119139810	119141120
chr1	119647488	119648744
chr1	145823418	145824736
chr1	145857374	145859396
chr1	145926985	145928040
chr1	145960168	145961300
chr1	147598686	147599442
chr1	147599858	147600589
chr1	149886392	149887257
chr1	150066801	150068227
chr1	150363453	150364332
chr1	150553329	150554446
chr1	150571560	150572507
chr1	150578842	150579953
chr1	150628919	150629919
chr1	150876064	150877125
chr1	150973867	150974490
chr1	150974514	150975142
chr1	151055217	151056014
chr1	151142759	151143725
chr1	151281758	151282535
chr1	151283476	151284611
chr1	151293146	151294532
chr1	151347043	151348260
chr1	151611765	151613115
chr1	151790123	151791184
chr1	151838121	151839112
chr1	151988199	151988986
chr1	153629224	153630355
chr1	153670348	153671265
chr1	153922565	153923265
chr1	153932168	153932842
chr1	153945767	153946978
chr1	153958173	153959051
chr1	154182981	154183893
chr1	154211539	154212811
chr1	154220450	154221073
chr1	154272201	154273133
chr1	154868725	154869628
chr1	154936506	154937450
chr1	154946336	154947818
chr1	154974173	154975154
chr1	155000537	155001495
chr1	155007019	155008240
chr1	155050450	155051604
chr1	155056553	155057697
chr1	155071714	155072322
chr1	155084581	155085756
chr1	155086614	155087965
chr1	155091187	155092303
chr1	155127593	155128365
chr1	155129811	155130483
chr1	155135474	155136698
chr1	155192579	155193792
chr1	155194302	155195250
chr1	155208668	155209629
chr1	155322956	155323782
chr1	155324050	155324982
chr1	155325083	155325924
chr1	156114748	156115422
chr1	156245362	156247867
chr1	156337906	156339107
chr1	156384124	156385451
chr1	156456408	156457708
chr1	156499876	156501479
chr1	156572092	156573058
chr1	156659488	156660385
chr1	156661068	156662240
chr1	156705416	156706079
chr1	156746492	156747341
chr1	156751244	156752370
chr1	156766929	156768132
chr1	156844669	156845750
chr1	156892871	156894090
chr1	156898021	156898701
chr1	156927495	156928240
chr1	156939605	156940842
chr1	158090732	158091859
chr1	161201805	161202726
chr1	162069235	162070363
chr1	166838994	166840367
chr1	167220508	167221160
chr1	167221359	167222362
chr1	167454590	167455804
chr1	167935776	167937494
chr1	168225606	168226353
chr1	168977087	168978111
chr1	169106078	169107388
chr1	171841098	171841939
chr1	172532346	172533526
chr1	173867262	173867962
chr1	173868053	173868708
chr1	174158872	174160072
chr1	175220890	175222079
chr1	176405747	176406624
chr1	178093527	178094087
chr1	178094100	178094699
chr1	178542420	178543436
chr1	178725129	178726576
chr1	179025564	179026340
chr1	179026559	179027194
chr1	179954335	179955652
chr1	180154595	180155409
chr1	181022524	181023292
chr1	181088226	181088998
chr1	181104773	181105920
chr1	181113207	181114045
chr1	182390538	182391355
chr1	182391422	182392094
chr1	182838845	182839990
chr1	183022363	183024380
chr1	183471048	183471721
chr1	183472964	183473517
chr1	184386591	184387439
chr1	184754529	184755375
chr1	185156748	185157626
chr1	186375265	186376046
chr1	198158690	198159657
chr1	200669384	200670447
chr1	201023325	201024412
chr1	201282854	201283553
chr1	201982905	201983875
chr1	202011996	202013104
chr1	202116269	202117041
chr1	202162264	202163527
chr1	202348285	202349211
chr1	202888447	202889366
chr1	202966224	202967410
chr1	203026105	203027050
chr1	203171223	203171937
chr1	203278579	203279588
chr1	204072844	204073912
chr1	204263022	204264357
chr1	204515614	204516645
chr1	204806606	204807599
chr1	204865753	204866563
chr1	204996530	204997407
chr1	205210645	205211207
chr1	205211308	205211945
chr1	205567706	205569198
chr1	205631232	205632230
chr1	205749104	205750118
chr1	205916956	205917846
chr1	206456920	206458108
chr1	206612078	206612833
chr1	209616860	209617666
chr1	211578963	211579999
chr1	211830234	211831146
chr1	212034885	212035930
chr1	212414474	212415622
chr1	212432472	212433341
chr1	212608149	212610216
chr1	213015100	213016114
chr1	213051009	213051830
chr1	214550611	214551635
chr1	215023665	215024511
chr1	220046085	220046956
chr1	222814770	222815570
chr1	223142793	223143587
chr1	223217697	223218708
chr1	223393740	223394534
chr1	223435992	223436823
chr1	223712426	223713344
chr1	223845083	223846754
chr1	224356643	224357841
chr1	224434405	224435863
chr1	224615883	224616788
chr1	224624290	224625149
chr1	224979268	224980866
chr1	225427181	225428536
chr1	225470171	225471163
chr1	225652563	225654127
chr1	225771834	225772589
chr1	225809876	225810548
chr1	225845485	225846440
chr1	225881849	225883261
chr1	225923430	225924574
chr1	225999112	226000327
chr1	226061387	226062004
chr1	226083115	226084425
chr1	226121237	226122938
chr1	226181749	226182588
chr1	226308156	226308840
chr1	226309017	226309682
chr1	226407451	226408421
chr1	226607212	226608339
chr1	226695475	226696403
chr1	226724510	226725627
chr1	226736507	226737585
chr1	226870001	226871139
chr1	226939762	226941075
chr1	227317832	227318997
chr1	227510765	227511623
chr1	227731806	227732496
chr1	227732551	227733254
chr1	227735014	227735848
chr1	227786786	227787574
chr1	227788255	227789155
chr1	227940395	227941165
chr1	227941357	227942091
chr1	228006445	228007339
chr1	228059642	228060465
chr1	228064238	228065292
chr1	228081681	228083224
chr1	228101797	228103590
chr1	228105790	228106779
chr1	228108558	228109731
chr1	228109981	228110621
chr1	228139646	228140511
chr1	228151857	228153283
chr1	228155224	228156138
chr1	228159596	228160586
chr1	228161735	228162575
chr1	228166178	228167186
chr1	228173745	228176020
chr1	228209751	228210787
chr1	228213234	228213879
chr1	228214110	228214838
chr1	228306459	228307407
chr1	228337638	228338412
chr1	228352721	228353591
chr1	228394573	228395607
chr1	228406246	228407567
chr1	228457601	228458154
chr1	228458317	228458911
chr1	228487135	228488195
chr1	228646602	228647221
chr1	228727296	228728282
chr1	228838671	228839957
chr1	229342034	229343305
chr1	229558353	229559533
chr1	229625679	229626931
chr1	230066473	230067412
chr1	230094652	230095727
chr1	230286424	230287325
chr1	230310955	230311809
chr1	230391923	230392636
chr1	230425313	230426827
chr1	230641641	230643063
chr1	230693785	230695063
chr1	230867956	230868734
chr1	231161947	231162948
chr1	231240755	231241592
chr1	231303896	231304909
chr1	231337483	231338675
chr1	231421610	231422803
chr1	231527925	231528911
chr1	231752771	231753632
chr1	232352053	232352898
chr1	232629213	232629842
chr1	232630001	232631061
chr1	232860753	232861550
chr1	233327125	233327744
chr1	233327809	233328484
chr1	233519626	233520771
chr1	233904848	233906153
chr1	234143438	234144582
chr1	234477828	234479246
chr1	234608127	234609309
chr1	234609821	234611521
chr1	234778237	234779245
chr1	234780392	234781230
chr1	234862842	234863721
chr1	235326656	235328358
chr1	235367040	235367805
chr1	235639569	235641066
chr1	235649453	235650093
chr1	235866552	235867604
chr1	236064032	236065475
chr1	236494090	236494988
chr1	236604034	236605680
chr1	237204968	237206191
chr1	239567668	239568776
chr1	240091332	240092372
chr1	240254217	240255169
chr1	241355935	241357780
chr1	241639984	241640730
chr1	241847665	241848255
chr1	241848300	241848962
chr1	241986176	241986994
chr1	244048092	244049737
chr1	244303035	244303783
chr1	244304342	244305107
chr1	244394800	244395762
chr1	244451544	244452492
chr1	244638847	244639878
chr1	244652014	244652634
chr1	244653024	244653716
chr1	244834735	244836007
chr1	244862459	244863080
chr1	244863288	244864978
chr1	244971146	244971725
chr2	264502	265112
chr2	676468	677701
chr2	2874337	2875310
chr2	3251534	3252440
chr2	3296324	3297569
chr2	3518499	3520298
chr2	8618881	8619616
chr2	8678523	8679564
chr2	8681006	8682382
chr2	8684476	8686437
chr2	9003408	9004094
chr2	9423021	9423943
chr2	9630561	9631456
chr2	10120204	10121003
chr2	10122408	10123668
chr2	10267422	10268043
chr2	10302288	10303625
chr2	10557520	10558544
chr2	10776063	10776841
chr2	11121434	11122405
chr2	11154921	11155768
chr2	11482298	11483580
chr2	11581980	11582961
chr2	11743886	11745249
chr2	20168617	20169543
chr2	20350681	20351423
chr2	20446610	20447735
chr2	20447796	20449138
chr2	20449287	20450182
chr2	20450296	20451024
chr2	20650703	20651630
chr2	20959249	20960317
chr2	23384920	23385968
chr2	23420139	23421557
chr2	23695478	23696355
chr2	23836755	23837489
chr2	23926708	23927636
chr2	24048890	24049937
chr2	24076190	24077310
chr2	24360283	24361014
chr2	24792910	24794144
chr2	24971348	24972149
chr2	25168254	25169122
chr2	25170172	25171498
chr2	25340855	25342512
chr2	25982029	25982712
chr2	26345615	26346686
chr2	26723599	26724605
chr2	27051465	27052418
chr2	27086763	27087686
chr2	27207461	27208606
chr2	27211404	27212673
chr2	27250039	27250846
chr2	27356797	27357549
chr2	27369227	27371007
chr2	27424468	27425757
chr2	27428072	27429421
chr2	27442150	27443016
chr2	28392094	28393194
chr2	32063411	32064273
chr2	32356554	32358130
chr2	32952708	32953863
chr2	36805486	36806813
chr2	36966370	36967028
chr2	37083551	37084764
chr2	38602228	38602986
chr2	38603128	38603770
chr2	38731477	38732470
chr2	38750834	38751991
chr2	39123888	39124711
chr2	43125385	43126251
chr2	43636667	43637411
chr2	43637908	43638488
chr2	43995543	43996752
chr2	44168477	44169059
chr2	44361559	44362342
chr2	44949240	44950395
chr2	45009011	45010338
chr2	46940597	46941422
chr2	47098579	47099755
chr2	47782817	47783391
chr2	47783699	47784421
chr2	48111120	48112099
chr2	54557750	54558517
chr2	55050223	55050822
chr2	55617390	55618152
chr2	60283935	60284638
chr2	60756328	60757080
chr2	60880997	60881965
chr2	61065293	61066434
chr2	61470754	61471452
chr2	61537984	61539098
chr2	61763959	61764931
chr2	61853611	61854259
chr2	61854336	61854905
chr2	63588372	63589043
chr2	64143676	64144695
chr2	64750458	64751651
chr2	65055947	65057043
chr2	65129824	65130712
chr2	65177371	65178192
chr2	65435593	65436651
chr2	69305950	69307282
chr2	69437000	69437939
chr2	69828917	69829887
chr2	70248070	70249097
chr2	70899876	70900854
chr2	71068038	71068828
chr2	71129908	71130926
chr2	71226508	71227755
chr2	71331423	71332172
chr2	72886422	72887830
chr2	72917224	72918123
chr2	72935781	72936639
chr2	72960255	72961265
chr2	73112718	73113470
chr2	73233054	73234542
chr2	73257025	73258278
chr2	74136027	74136991
chr2	74147632	74148344
chr2	74457513	74458926
chr2	74481739	74482979
chr2	74503110	74503711
chr2	74503802	74504447
chr2	74506934	74507983
chr2	74653917	74654821
chr2	84971183	84972465
chr2	85538427	85539622
chr2	85545964	85546842
chr2	85561130	85561924
chr2	85602314	85603487
chr2	85660950	85662108
chr2	85813931	85815150
chr2	88627499	88628127
chr2	95345442	95346231
chr2	96107960	96109040
chr2	96115996	96117088
chr2	96208356	96209258
chr2	96265560	96266643
chr2	96508929	96509481
chr2	96509494	96510096
chr2	96532670	96533795
chr2	96551265	96551925
chr2	96552016	96552737
chr2	96763266	96764519
chr2	96815881	96816844
chr2	96857425	96858626
chr2	96868489	96869108
chr2	96869903	96870456
chr2	97645217	97646177
chr2	97660314	97661802
chr2	97663210	97663940
chr2	97663990	97664604
chr2	98608060	98609053
chr2	98730415	98731591
chr2	99141024	99142140
chr2	99335862	99336731
chr2	99336765	99337626
chr2	99813872	99815034
chr2	100562583	100563536
chr2	102736381	102737245
chr2	104842513	104843736
chr2	104856018	104857279
chr2	105037839	105038656
chr2	105369707	105370656
chr2	105398271	105398889
chr2	105398895	105399477
chr2	106269856	106270829
chr2	108533876	108534817
chr2	108786415	108787230
chr2	108923093	108923816
chr2	109201265	109202252
chr2	109613621	109614808
chr2	110677819	110678452
chr2	111016669	111017407
chr2	111116936	111117569
chr2	111117631	111118386
chr2	111120403	111121447
chr2	111121945	111123405
chr2	112520043	112521522
chr2	112645252	112646158
chr2	112764321	112765252
chr2	113235015	113235921
chr2	113755998	113756993
chr2	113889485	113891025
chr2	120252427	120253343
chr2	120376909	120377583
chr2	120430524	120431520
chr2	120792524	120793676
chr2	120870317	120871075
chr2	120951220	120952115
chr2	121245164	121246207
chr2	121386393	121387477
chr2	121736665	121737386
chr2	127387344	127388605
chr2	127640094	127641173
chr2	128027726	128028813
chr2	128090782	128091600
chr2	128305485	128306427
chr2	128314961	128316208
chr2	128318676	128319929
chr2	128367883	128368618
chr2	128421307	128422572
chr2	129709118	129709916
chr2	130355357	130356150
chr2	130797398	130798586
chr2	130822476	130823482
chr2	131092812	131094109
chr2	131096818	131097910
chr2	133836727	133838005
chr2	134918309	134919252
chr2	135531145	135532293
chr2	135721715	135723156
chr2	135898557	135899169
chr2	144332230	144333193
chr2	148644925	148645688
chr2	150369626	150370416
chr2	152717016	152719627
chr2	156332526	156333618
chr2	165953304	165954123
chr2	167292767	167293595
chr2	171159854	171161528
chr2	172102005	172103036
chr2	173354374	173355215
chr2	173963317	173964504
chr2	175167738	175168668
chr2	176092360	176093174
chr2	177212276	177213073
chr2	178450889	178451595
chr2	190648613	190649877
chr2	195656166	195656839
chr2	195656853	195657908
chr2	196592459	196593316
chr2	197310369	197311139
chr2	197499401	197500662
chr2	200525842	200526824
chr2	200962809	200963755
chr2	201115964	201116906
chr2	201451068	201452090
chr2	201972296	201973429
chr2	202034082	202034910
chr2	202238295	202239114
chr2	202265566	202266338
chr2	202634571	202635173
chr2	202932386	202933287
chr2	203014403	203015036
chr2	203327929	203328933
chr2	207165862	207166616
chr2	207528944	207530129
chr2	207711123	207712322
chr2	207769263	207770484
chr2	213151485	213152216
chr2	214809207	214810442
chr2	218270009	218270895
chr2	218356561	218357624
chr2	218395918	218396956
chr2	218406123	218407148
chr2	218659135	218660087
chr2	218710461	218711314
chr2	218962466	218963515
chr2	219008746	219009611
chr2	219176721	219177559
chr2	219177988	219178884
chr2	219206346	219207273
chr2	219228439	219229176
chr2	219229552	219230116
chr2	219294490	219295170
chr2	219387671	219388584
chr2	219497074	219499123
chr2	219516631	219517471
chr2	219537671	219539235
chr2	219551459	219552114
chr2	219552535	219553264
chr2	219570350	219571157
chr2	221572063	221572848
chr2	222860776	222861789
chr2	224585243	224585904
chr2	226799228	226800153
chr2	229610921	229612185
chr2	229713611	229714537
chr2	230986740	230987679
chr2	231463582	231464610
chr2	231467023	231468442
chr2	231514096	231514992
chr2	231605754	231606678
chr2	231666100	231667531
chr2	231680127	231680750
chr2	231680899	231681760
chr2	231706408	231707527
chr2	231707657	231708802
chr2	231711976	231712715
chr2	231713396	231713976
chr2	231715357	231716697
chr2	231716756	231717418
chr2	231780821	231782090
chr2	231785965	231786992
chr2	232350909	232351765
chr2	232434175	232435073
chr2	232444056	232445103
chr2	232696970	232697956
chr2	233251306	233252169
chr2	234496400	234497225
chr2	235492579	235494625
chr2	235669779	235670987
chr2	236167312	236168431
chr2	237691861	237692729
chr2	237912505	237913810
chr2	238060640	238061444
chr2	238239519	238240560
chr2	238288245	238289555
chr2	238426578	238427459
chr2	239129663	239130428
chr2	239400524	239401803
chr2	239515185	239515924
chr2	239735442	239736272
chr2	240214795	240215711
chr2	240232913	240233648
chr2	240452447	240453470
chr2	240560912	240561768
chr2	240578368	240579032
chr2	240586139	240587153
chr2	240735483	240736374
chr2	240740013	240741502
chr2	240873986	240875087
chr2	240904668	240905393
chr2	240930652	240931326
chr2	240998280	240999123
chr2	241188111	241189304
chr2	241212942	241213852
chr2	241217272	241218075
chr2	241315485	241316603
chr2	241355761	241356901
chr2	241472382	241473216
chr2	241508195	241509541
chr2	241559899	241560619
chr2	241609834	241610783
chr2	241636985	241637897
chr2	241701567	241702655
chr2	241734318	241735238
chr2	241763777	241764789
chr2	241773695	241774876
chr3	3126457	3127369
chr3	4867593	4868475
chr3	4977505	4978238
chr3	4978924	4979531
chr3	5187230	5188262
chr3	9309094	9309939
chr3	9396136	9396756
chr3	9397176	9397768
chr3	9792040	9794040
chr3	9917462	9918383
chr3	9932828	9934173
chr3	10141276	10142127
chr3	10526911	10527910
chr3	11544370	11545583
chr3	12472299	12473464
chr3	12484120	12485127
chr3	12627671	12628450
chr3	12950722	12951393
chr3	12951886	12952503
chr3	12982903	12983669
chr3	12983945	12984688
chr3	12992857	12993668
chr3	13281534	13282751
chr3	13480014	13481347
chr3	13566131	13567348
chr3	13787434	13788376
chr3	13832826	13833788
chr3	14133529	14134622
chr3	14920702	14921730
chr3	14947711	14948672
chr3	15205807	15206922
chr3	17912126	17913294
chr3	20041227	20041879
chr3	24185389	24186440
chr3	27483505	27484753
chr3	28241248	28242127
chr3	31532637	31534150
chr3	32106104	32106971
chr3	32684604	32685721
chr3	33096650	33097687
chr3	33218152	33219363
chr3	33439885	33441496
chr3	33798467	33799371
chr3	35947400	35948308
chr3	37175851	37177008
chr3	38003765	38004615
chr3	38137048	38137829
chr3	38164885	38165740
chr3	38452955	38453847
chr3	38580285	38581860
chr3	39383707	39384396
chr3	40309125	40310068
chr3	40452924	40453617
chr3	41198995	41199876
chr3	42501119	42502237
chr3	42505372	42506132
chr3	42581577	42582343
chr3	43113881	43115020
chr3	43621568	43622496
chr3	43769388	43770286
chr3	44861177	44861778
chr3	44861841	44862597
chr3	45689015	45689991
chr3	46845639	46846457
chr3	46979119	46980221
chr3	47009002	47009783
chr3	47163835	47164533
chr3	47475518	47476301
chr3	47577785	47578977
chr3	47781350	47782520
chr3	47802595	47803410
chr3	48088696	48089673
chr3	48414201	48415127
chr3	48556284	48557651
chr3	48564401	48565702
chr3	48579044	48579932
chr3	48598512	48599370
chr3	48599430	48600080
chr3	48635268	48636096
chr3	48655944	48656983
chr3	48661373	48662877
chr3	48685356	48686247
chr3	48898408	48899382
chr3	48918424	48919467
chr3	49006806	49008038
chr3	49018009	49018697
chr3	49020660	49021286
chr3	49022382	49022997
chr3	49108312	49109149
chr3	49120175	49121229
chr3	49132924	49133959
chr3	49161205	49161866
chr3	49162046	49162806
chr3	49358087	49358962
chr3	49411287	49412186
chr3	49469737	49470643
chr3	49471430	49472491
chr3	49673410	49674519
chr3	49704471	49705416
chr3	49719166	49719890
chr3	49723388	49724500
chr3	49786161	49787397
chr3	49929203	49930416
chr3	50150760	50152068
chr3	50203213	50204247
chr3	50227268	50227929
chr3	50235372	50236782
chr3	50237507	50238223
chr3	50238454	50239140
chr3	50256600	50257958
chr3	50273477	50274457
chr3	50294593	50295781
chr3	50297641	50298323
chr3	50299178	50300085
chr3	50319993	50320989
chr3	50321074	50322288
chr3	50568735	50569616
chr3	50611616	50612586
chr3	51384836	51385489
chr3	51499162	51500133
chr3	51670795	51672421
chr3	51941478	51942059
chr3	51942138	51942888
chr3	51967389	51968312
chr3	52056157	52057694
chr3	52229434	52230944
chr3	52397224	52398093
chr3	52409526	52410598
chr3	52513171	52513932
chr3	52516211	52517393
chr3	52535483	52536976
chr3	52685420	52686241
chr3	52705284	52707019
chr3	52785901	52786842
chr3	52790426	52791156
chr3	52841363	52842689
chr3	53228339	53229518
chr3	53347474	53348157
chr3	53846057	53846866
chr3	54024820	54025642
chr3	57078706	57080138
chr3	57756113	57757560
chr3	58190266	58191289
chr3	58237554	58238392
chr3	58332419	58333595
chr3	58433325	58434178
chr3	58491563	58492520
chr3	58530332	58531061
chr3	58632690	58633506
chr3	66500670	66501518
chr3	73624100	73624885
chr3	79018611	79019422
chr3	81760970	81762116
chr3	88058512	88059632
chr3	98522650	98523344
chr3	100334496	100335558
chr3	101778730	101779814
chr3	101848811	101849798
chr3	105366076	105367025
chr3	105868286	105869634
chr3	106720390	106721494
chr3	107523074	107523986
chr3	108589083	108589891
chr3	113947532	113948526
chr3	115146941	115148137
chr3	120094069	120094692
chr3	120094767	120095457
chr3	122415810	122416645
chr3	122514171	122515271
chr3	122795097	122795964
chr3	123414698	123415681
chr3	123883543	123884907
chr3	124032749	124033502
chr3	124887107	124888018
chr3	125356841	125357819
chr3	125374379	125375561
chr3	125445441	125446169
chr3	125595050	125596008
chr3	126130117	126130934
chr3	126131434	126132001
chr3	126389158	126389935
chr3	126475287	126476299
chr3	126982442	126983454
chr3	127030656	127031326
chr3	127590622	127591661
chr3	128051748	128052573
chr3	128415683	128416738
chr3	128426141	128426936
chr3	128487585	128488451
chr3	128492665	128493455
chr3	128607623	128608678
chr3	128616959	128618189
chr3	128906425	128907344
chr3	128993603	128994304
chr3	129183496	129184328
chr3	129315915	129317202
chr3	129320033	129321320
chr3	129439900	129440795
chr3	133572955	133574910
chr3	133700134	133700923
chr3	133892306	133893282
chr3	133894346	133894998
chr3	134373824	134375115
chr3	134485499	134486409
chr3	135965141	135966088
chr3	136195071	136195853
chr3	136196220	136196778
chr3	136751192	136751995
chr3	136752101	136752966
chr3	138915155	138916300
chr3	141737808	141738461
chr3	142447055	142448058
chr3	146160794	146161647
chr3	148075475	148076719
chr3	148990898	148991844
chr3	149970686	149971780
chr3	150546134	150546934
chr3	155869891	155871082
chr3	160564697	160565339
chr3	160565376	160566009
chr3	170356789	170357749
chr3	171809636	171810937
chr3	179322682	179323504
chr3	179562360	179563197
chr3	179563435	179564087
chr3	184174537	184175519
chr3	184185408	184186321
chr3	184260677	184262040
chr3	184298756	184299811
chr3	184358394	184359470
chr3	184360996	184361689
chr3	184361733	184362557
chr3	184362615	184363681
chr3	186108814	186109571
chr3	186566926	186567713
chr3	187738418	187739640
chr3	194133685	194134576
chr3	194134787	194135454
chr3	194140579	194141394
chr3	194141481	194142133
chr3	194277013	194277836
chr3	194758426	194759269
chr3	195908717	195910133
chr3	196081380	196082534
chr3	196568278	196569114
chr4	674026	675223
chr4	676498	677366
chr4	678700	679923
chr4	680382	681294
chr4	681549	682177
chr4	705276	705978
chr4	781327	782818
chr4	825168	826111
chr4	829896	830606
chr4	849154	849956
chr4	866366	867361
chr4	931964	932755
chr4	971949	973005
chr4	973230	973917
chr4	974166	975138
chr4	986817	988206
chr4	990214	991459
chr4	1010454	1011090
chr4	1011418	1012003
chr4	1027312	1028280
chr4	1194365	1195783
chr4	1247855	1248702
chr4	1248969	1249785
chr4	1293682	1294581
chr4	1317194	1318017
chr4	1325298	1326283
chr4	1345937	1346698
chr4	1346781	1347675
chr4	1411168	1412210
chr4	1513038	1513751
chr4	1580163	1581021
chr4	1684227	1685025
chr4	1711792	1713108
chr4	1716357	1717311
chr4	1720381	1721064
chr4	1721587	1722324
chr4	1756798	1757570
chr4	1765986	1766685
chr4	1766747	1767264
chr4	1772889	1773974
chr4	1792906	1794716
chr4	1805719	1806746
chr4	1810627	1811539
chr4	1855472	1856769
chr4	1869173	1870535
chr4	1870556	1871975
chr4	1987109	1988048
chr4	2008697	2009837
chr4	2041026	2042309
chr4	2060898	2061825
chr4	2062566	2063171
chr4	2063486	2064120
chr4	2069836	2070384
chr4	2071673	2072463
chr4	2241910	2242699
chr4	2258401	2259198
chr4	2261020	2263016
chr4	2352463	2353207
chr4	2408600	2410011
chr4	2416732	2417939
chr4	2418015	2419219
chr4	2427262	2428414
chr4	2536065	2536768
chr4	2537142	2537911
chr4	2755577	2756718
chr4	2833328	2834615
chr4	2843207	2844227
chr4	2931405	2932679
chr4	2962990	2964233
chr4	3293229	3294529
chr4	3426040	3427303
chr4	3480534	3481349
chr4	3488763	3489969
chr4	3498722	3500212
chr4	3501978	3503228
chr4	3721151	3722090
chr4	3765272	3766139
chr4	3781275	3781811
chr4	3782180	3782892
chr4	3836086	3836819
chr4	3871821	3873023
chr4	4386293	4387433
chr4	5955948	5956674
chr4	5992845	5993693
chr4	6264018	6265072
chr4	6319339	6320038
chr4	6573405	6574523
chr4	6580131	6581203
chr4	6581640	6582867
chr4	6672989	6674169
chr4	6723218	6724392
chr4	6782543	6783533
chr4	6889425	6890262
chr4	7042812	7044390
chr4	7050319	7051067
chr4	7538913	7539787
chr4	7739935	7740789
chr4	8088984	8090200
chr4	8117166	8117975
chr4	8120968	8122225
chr4	8211481	8212963
chr4	8236015	8236788
chr4	8240045	8240895
chr4	8543835	8544680
chr4	8585763	8587009
chr4	8600454	8601216
chr4	8641698	8642716
chr4	8656465	8658146
chr4	8737973	8739311
chr4	8870998	8871869
chr4	10083789	10084986
chr4	13483888	13484843
chr4	15002028	15002808
chr4	17436630	17437966
chr4	20254381	20255615
chr4	25913809	25914804
chr4	30722254	30723564
chr4	37686168	37687277
chr4	39044384	39045543
chr4	39527063	39528006
chr4	39638633	39639452
chr4	42656563	42657444
chr4	48340976	48341694
chr4	51842602	51843759
chr4	52712129	52713174
chr4	53730943	53731619
chr4	55346195	55346941
chr4	55948621	55949424
chr4	56435682	56436687
chr4	56976781	56977906
chr4	70688007	70688995
chr4	70704437	70705762
chr4	70839585	70840312
chr4	76306120	76306982
chr4	82284625	82285478
chr4	82374096	82374992
chr4	82428562	82429905
chr4	82429983	82430946
chr4	82899979	82901024
chr4	83012648	83013335
chr4	84497675	84498614
chr4	88007092	88008571
chr4	88283858	88285151
chr4	98995164	98995938
chr4	99946308	99947497
chr4	99949521	99950139
chr4	99950150	99950829
chr4	102344450	102345184
chr4	102501404	102502559
chr4	102826768	102828846
chr4	102868475	102869554
chr4	106315601	106316908
chr4	107719608	107720985
chr4	107989456	107990139
chr4	110631569	110632720
chr4	112359023	112360024
chr4	119212225	119213458
chr4	122826624	122827730
chr4	124711885	124713250
chr4	128060726	128061939
chr4	128287386	128288453
chr4	132062516	132063381
chr4	139015494	139016505
chr4	139175677	139176362
chr4	139176851	139178377
chr4	139295203	139296023
chr4	139296065	139296692
chr4	139301078	139302317
chr4	139453332	139454406
chr4	140151198	140152531
chr4	140622032	140622778
chr4	140755647	140756948
chr4	140863979	140864736
chr4	141132206	141133369
chr4	141213213	141214171
chr4	141636900	141637616
chr4	142473988	142474885
chr4	143184608	143185545
chr4	143336625	143337779
chr4	143699499	143700314
chr4	145097962	145099392
chr4	145100898	145101587
chr4	145180246	145181536
chr4	145618803	145619792
chr4	145936410	145937712
chr4	146175484	146176575
chr4	147481085	147481827
chr4	147731488	147732257
chr4	147984482	147985294
chr4	151000982	151001722
chr4	151014411	151015749
chr4	151600180	151601269
chr4	152534675	152535265
chr4	152535837	152536745
chr4	153344266	153345218
chr4	153465455	153466481
chr4	153491652	153492372
chr4	158670833	158671393
chr4	158671834	158672777
chr4	158723011	158723688
chr4	158782858	158783721
chr4	165112077	165113579
chr4	165327133	165327728
chr4	165327854	165328460
chr4	165378741	165380008
chr4	168831543	168832522
chr4	168832662	168833337
chr4	168877687	168878450
chr4	169270493	169271668
chr4	170026445	170027889
chr4	172050732	172051861
chr4	172975120	172976283
chr4	173334101	173335639
chr4	173529228	173530486
chr4	176001340	176002611
chr4	176065459	176066417
chr4	177441928	177442651
chr4	182141648	182142941
chr4	182813359	182814401
chr4	183504188	183505709
chr4	183797048	183797790
chr4	183905543	183906592
chr4	184472932	184473917
chr4	184648072	184650055
chr4	185019006	185019880
chr4	185209128	185209841
chr4	185396064	185396968
chr4	185471159	185471925
chr4	185838940	185839645
chr4	186190844	186191996
chr4	186726452	186727355
chr4	187073912	187075043
chr5	53431	54131
chr5	162189	163346
chr5	181366	182359
chr5	186284	187491
chr5	188319	189460
chr5	190408	191067
chr5	191953	192752
chr5	217975	219085
chr5	271115	271934
chr5	321416	322285
chr5	398381	399922
chr5	414610	415400
chr5	415555	416741
chr5	421767	423278
chr5	447938	449068
chr5	472798	473840
chr5	477791	479716
chr5	494351	495464
chr5	639555	640762
chr5	663478	664785
chr5	668217	669486
chr5	669739	672136
chr5	674337	675214
chr5	693081	693964
chr5	860409	861159
chr5	876798	877484
chr5	892398	893409
chr5	1245898	1246695
chr5	1256407	1257213
chr5	1295399	1296153
chr5	1522974	1523722
chr5	1524128	1524932
chr5	1594237	1594908
chr5	1807410	1808240
chr5	1811459	1812573
chr5	1840741	1841585
chr5	1846909	1848115
chr5	4878900	4879719
chr5	5421871	5423169
chr5	6455513	6457057
chr5	6711892	6713049
chr5	10126512	10127394
chr5	10353092	10353896
chr5	10563500	10564679
chr5	10566319	10567365
chr5	10760971	10761798
chr5	14581646	14582574
chr5	16609771	16610598
chr5	16893731	16895110
chr5	16935915	16936960
chr5	31638429	31639559
chr5	32311973	32312705
chr5	32312719	32313724
chr5	32443223	32444434
chr5	34929102	34930484
chr5	36138730	36139652
chr5	36151209	36152358
chr5	36241662	36242800
chr5	37248849	37249750
chr5	38258266	38259195
chr5	40834804	40835664
chr5	41122187	41123005
chr5	43121238	43122105
chr5	43312640	43313274
chr5	43313408	43314055
chr5	43555889	43557063
chr5	52799747	52800537
chr5	54310285	54310989
chr5	55031471	55032587
chr5	55534436	55535580
chr5	55994636	55995417
chr5	57172191	57173006
chr5	57173430	57174674
chr5	61332801	61333582
chr5	65721630	65722596
chr5	66143946	66144835
chr5	68215349	68216208
chr5	73436712	73437934
chr5	75336738	75337432
chr5	78293991	78294922
chr5	78488310	78489310
chr5	78984061	78985532
chr5	80255416	80256273
chr5	80407536	80408760
chr5	81750802	81751917
chr5	83076879	83078216
chr5	88141087	88141905
chr5	88674128	88675199
chr5	90473944	90475229
chr5	90558382	90559124
chr5	91379922	91380948
chr5	91382698	91383689
chr5	93620751	93621733
chr5	95620840	95621863
chr5	95731082	95731842
chr5	95961196	95962050
chr5	96934644	96935872
chr5	98773285	98773985
chr5	98774122	98774787
chr5	101239313	101240263
chr5	102754515	102755706
chr5	102865068	102866520
chr5	103258498	103260130
chr5	107409321	107410179
chr5	108381194	108382654
chr5	108555745	108556849
chr5	108727955	108728626
chr5	108748174	108749470
chr5	109409785	109410559
chr5	109689046	109690367
chr5	111224004	111224971
chr5	111512070	111513102
chr5	112976261	112976977
chr5	115169552	115170886
chr5	115544057	115545252
chr5	115753649	115754615
chr5	115816190	115817397
chr5	115921188	115922055
chr5	116084580	116086086
chr5	116574345	116575290
chr5	118987463	118988861
chr5	119816703	119817507
chr5	123035416	123037190
chr5	126594737	126595846
chr5	126777360	126777969
chr5	126778024	126778653
chr5	127030247	127031238
chr5	127517308	127518273
chr5	128083257	128083891
chr5	128084029	128084743
chr5	129094369	129095229
chr5	129461023	129461976
chr5	131796880	131797852
chr5	132055487	132056581
chr5	132227250	132228394
chr5	132490446	132491454
chr5	132556561	132557201
chr5	132737181	132738462
chr5	133051448	133052083
chr5	133052436	133053019
chr5	133842936	133843816
chr5	134176800	134177476
chr5	134225869	134226663
chr5	134525258	134526318
chr5	134526325	134527330
chr5	134571848	134573129
chr5	134758266	134759261
chr5	135010814	135012053
chr5	135033499	135035062
chr5	135048421	135049599
chr5	135051531	135052447
chr5	135190872	135191973
chr5	135825091	135826382
chr5	136132244	136133339
chr5	137469856	137470777
chr5	137753586	137754331
chr5	137754392	137755021
chr5	138337794	138338470
chr5	138352121	138353129
chr5	138463788	138464499
chr5	138464546	138466319
chr5	138472038	138472816
chr5	138542704	138544140
chr5	138575050	138576222
chr5	138640583	138641300
chr5	139293399	139294153
chr5	139294266	139294921
chr5	139341595	139342649
chr5	139377960	139378760
chr5	139560514	139561533
chr5	139561829	139562442
chr5	139647971	139648758
chr5	139666881	139667819
chr5	139724536	139725381
chr5	139787485	139788014
chr5	139788064	139788809
chr5	139872838	139873945
chr5	139904374	139905573
chr5	140143388	140144133
chr5	140149138	140150054
chr5	140175506	140176191
chr5	140346372	140347217
chr5	140401012	140402187
chr5	140548694	140549372
chr5	140563988	140565086
chr5	140664194	140665040
chr5	140862189	140863134
chr5	141524613	141525345
chr5	141617970	141618664
chr5	141618774	141619484
chr5	141636941	141637619
chr5	141650113	141650974
chr5	141878467	141879211
chr5	141923333	141924357
chr5	142012467	142013487
chr5	142108225	142109219
chr5	142254109	142254795
chr5	142304319	142305190
chr5	142323275	142324009
chr5	142324423	142325343
chr5	145949045	145950327
chr5	146203109	146204262
chr5	146351786	146352754
chr5	147225916	147227229
chr5	149271402	149272664
chr5	149412438	149413572
chr5	149729805	149730382
chr5	149730450	149731461
chr5	150000061	150001263
chr5	150212886	150214051
chr5	150357186	150357845
chr5	150357905	150358522
chr5	150402265	150402983
chr5	150504927	150506314
chr5	150649650	150650521
chr5	150656381	150657657
chr5	150758376	150759326
chr5	151080413	151081047
chr5	151081273	151081945
chr5	151583946	151584670
chr5	151663234	151664023
chr5	151758414	151758976
chr5	151770269	151771978
chr5	154133753	154134475
chr5	154445549	154446673
chr5	154477902	154478864
chr5	154682226	154683031
chr5	154754498	154755508
chr5	154858162	154858865
chr5	156863933	156864640
chr5	159097113	159098432
chr5	159099800	159100920
chr5	159208339	159209902
chr5	160118531	160119114
chr5	160119439	160120304
chr5	160311966	160313279
chr5	160421567	160422416
chr5	165587967	165589158
chr5	168291595	168292719
chr5	168578603	168579221
chr5	168579559	168580405
chr5	168947053	168947870
chr5	169169777	169170963
chr5	169300410	169301250
chr5	169583479	169584210
chr5	170861677	170862860
chr5	171387140	171387910
chr5	171388110	171389037
chr5	171418447	171419268
chr5	171420676	171421388
chr5	171471496	171472164
chr5	171750324	171751630
chr5	172006046	172007396
chr5	172282742	172283392
chr5	172283491	172284338
chr5	172364759	172365965
chr5	172766091	172766706
chr5	172767478	172768335
chr5	172769785	172770474
chr5	172771381	172771925
chr5	172958452	172959852
chr5	172983419	172984307
chr5	173056132	173056857
chr5	173458587	173459520
chr5	173887641	173888562
chr5	174214715	174215413
chr5	175478250	175479179
chr5	175796722	175797522
chr5	175843133	175844273
chr5	175871490	175872113
chr5	176365534	176366800
chr5	176388148	176389246
chr5	176447217	176448010
chr5	176448019	176448980
chr5	176542557	176543677
chr5	176643038	176644224
chr5	176646672	176647745
chr5	176874764	176875777
chr5	177006025	177007072
chr5	177022360	177023508
chr5	177086199	177087727
chr5	177133281	177134177
chr5	177301524	177302298
chr5	177310542	177311624
chr5	177311815	177312917
chr5	177338387	177339274
chr5	177370407	177371609
chr5	177378645	177379855
chr5	177425858	177426801
chr5	177427500	177428138
chr5	177431178	177432229
chr5	177443144	177443708
chr5	177443947	177444596
chr5	177454870	177456013
chr5	177457151	177458057
chr5	177474554	177475603
chr5	177491306	177492105
chr5	177494049	177495241
chr5	177496939	177498249
chr5	177511692	177513172
chr5	178121441	178122416
chr5	178130267	178131262
chr5	178153669	178154379
chr5	178204078	178204665
chr5	178205075	178205719
chr5	178224943	178225730
chr5	178231234	178231913
chr5	178232392	178233105
chr5	178366054	178367145
chr5	178911417	178912513
chr5	179023487	179024398
chr5	179344279	179345165
chr5	179366323	179367251
chr5	179623133	179624192
chr5	179698212	179699258
chr5	179732348	179733414
chr5	179773653	179774983
chr5	179800633	179801900
chr5	179802285	179802912
chr5	179811035	179811872
chr5	179820011	179821083
chr5	179821155	179821869
chr5	179824822	179826066
chr5	179858310	179859247
chr5	179892008	179893312
chr5	179895205	179895982
chr5	180071604	180072419
chr5	180291235	180292363
chr5	180468596	180469329
chr5	180608894	180609871
chr5	180613306	180614060
chr5	180614234	180614778
chr5	180809652	180810243
chr5	180810384	180811078
chr5	181159307	181159973
chr5	181160315	181160951
chr5	181184049	181184773
chr5	181187517	181188864
chr5	181190206	181191090
chr5	181197141	181198242
chr5	181222014	181222739
chr5	181223000	181224254
chr5	181246541	181247587
chr6	291666	292852
chr6	692255	693277
chr6	1312548	1314133
chr6	1317247	1318240
chr6	1381458	1382444
chr6	1604563	1605626
chr6	1608762	1610153
chr6	1611418	1612038
chr6	2245292	2246078
chr6	2765011	2765596
chr6	2765614	2766287
chr6	2841268	2842350
chr6	2988269	2989587
chr6	3068394	3069433
chr6	3162476	3163391
chr6	4018360	4019134
chr6	4775693	4776855
chr6	7106653	7107596
chr6	7312569	7313613
chr6	7389299	7390188
chr6	7541048	7542079
chr6	7909775	7911494
chr6	8063602	8064905
chr6	10403575	10404860
chr6	11093284	11094470
chr6	12008552	12009421
chr6	13574106	13575021
chr6	13591339	13592097
chr6	13614885	13615731
chr6	13711544	13712358
chr6	13873200	13874398
chr6	15066904	15067670
chr6	15244922	15246203
chr6	16128871	16129630
chr6	16129842	16130579
chr6	16759661	16761155
chr6	16761361	16762070
chr6	18154982	18155858
chr6	18264437	18265235
chr6	19804481	19805126
chr6	19836975	19837603
chr6	20211827	20212917
chr6	20401468	20402633
chr6	20403078	20403784
chr6	24494981	24495752
chr6	24720591	24721772
chr6	24774486	24775644
chr6	26157126	26158094
chr6	26555908	26556737
chr6	27145416	27146291
chr6	27251237	27252082
chr6	27254311	27255073
chr6	27687300	27688301
chr6	27892044	27892635
chr6	33579246	33580578
chr6	33772370	33773286
chr6	33854577	33855847
chr6	34154105	34155344
chr6	34236717	34238139
chr6	34247381	34248105
chr6	34248362	34249651
[truncated: 4,800 more rows]

## Sheet: Supplementary Table 1b
Chr	Start	End
chr1	821533	821796
chr1	899846	900226
chr1	903856	904698
chr1	913740	913963
chr1	914908	915194
chr1	916427	916807
chr1	918388	918564
chr1	918654	918939
chr1	919416	919748
chr1	921216	921586
chr1	923722	923984
chr1	924708	925416
chr1	927157	927495
chr1	927530	927690
chr1	929919	930162
chr1	933008	933641
chr1	935265	935539
chr1	935610	936234
chr1	936978	937307
chr1	938471	938915
chr1	939863	940238
chr1	940358	940721
chr1	940962	941200
chr1	941272	943030
chr1	943097	943526
chr1	944794	945259
chr1	947441	947925
chr1	948190	948478
chr1	950885	951159
chr1	951264	951653
chr1	960396	961449
chr1	962289	962625
chr1	963035	963193
chr1	963840	964114
chr1	964180	964515
chr1	966541	966952
chr1	970367	970620
chr1	970895	971172
chr1	971832	972095
chr1	973405	973763
chr1	975921	976485
chr1	978465	979003
chr1	980810	980991
chr1	981973	982246
chr1	982377	982606
chr1	982860	983258
chr1	984306	984561
chr1	986603	986780
chr1	994767	995025
chr1	995706	996195
chr1	997103	997319
chr1	997345	997605
chr1	997614	999345
chr1	999419	999766
chr1	999841	1000955
chr1	1001865	1001977
chr1	1002835	1003145
chr1	1003252	1003658
chr1	1005925	1006527
chr1	1006772	1007073
chr1	1013278	1013704
chr1	1014829	1015087
chr1	1015474	1015607
chr1	1019229	1019935
chr1	1020612	1020831
chr1	1022230	1022475
chr1	1022963	1023193
chr1	1023229	1024016
chr1	1024489	1025022
chr1	1025105	1025572
chr1	1032895	1033217
chr1	1036310	1036573
chr1	1040517	1040967
chr1	1046399	1046920
chr1	1048164	1048374
chr1	1050858	1051096
chr1	1053357	1053671
chr1	1054367	1054784
chr1	1058560	1058862
chr1	1059165	1059311
chr1	1059357	1060032
chr1	1061586	1061859
chr1	1062361	1062674
chr1	1062829	1063081
chr1	1063979	1064098
chr1	1064447	1064670
chr1	1067234	1067746
chr1	1069117	1069658
chr1	1070599	1070920
chr1	1072185	1072538
chr1	1074995	1075277
chr1	1079624	1079846
chr1	1081046	1081512
chr1	1081953	1082123
chr1	1082490	1082793
chr1	1083798	1084087
chr1	1084323	1084729
chr1	1086200	1086503
chr1	1087967	1088078
chr1	1089436	1089760
chr1	1107107	1107290
chr1	1115959	1116630
chr1	1122284	1122460
chr1	1129110	1129246
chr1	1141647	1141986
chr1	1145816	1146169
chr1	1146987	1147215
chr1	1147673	1148042
chr1	1148587	1148850
chr1	1149362	1149575
chr1	1156919	1157263
chr1	1157893	1158137
chr1	1165040	1165438
chr1	1166870	1167472
chr1	1167580	1167822
chr1	1168292	1168502
chr1	1168813	1169101
chr1	1169815	1170057
chr1	1171762	1171970
chr1	1176677	1176922
chr1	1176996	1177274
chr1	1177547	1177807
chr1	1181067	1181301
chr1	1184945	1185160
chr1	1198799	1198987
chr1	1199961	1200185
chr1	1200410	1200832
chr1	1201420	1201647
chr1	1204655	1204884
chr1	1205368	1205683
chr1	1211877	1212051
chr1	1213299	1213484
chr1	1219708	1220030
chr1	1222461	1222643
chr1	1226471	1226670
chr1	1227505	1227811
chr1	1228544	1228974
chr1	1230406	1230558
chr1	1231030	1231577
chr1	1231755	1232285
chr1	1232319	1232706
chr1	1235461	1235804
chr1	1236134	1236634
chr1	1236880	1237140
chr1	1237735	1238119
chr1	1238382	1238795
chr1	1241522	1241762
chr1	1241951	1242222
chr1	1242986	1243172
chr1	1243444	1243716
chr1	1243797	1244183
chr1	1246629	1246835
chr1	1247425	1247749
chr1	1247887	1248054
chr1	1257527	1257775
chr1	1267508	1267846
chr1	1268005	1268460
chr1	1273394	1274136
chr1	1279177	1279376
chr1	1284674	1285040
chr1	1285092	1285747
chr1	1286584	1286825
chr1	1290512	1290757
chr1	1291182	1291434
chr1	1292114	1292363
chr1	1293467	1293787
chr1	1293933	1294138
chr1	1294611	1294914
chr1	1295101	1295294
chr1	1299414	1299656
chr1	1299672	1300793
chr1	1301710	1302047
chr1	1302417	1302664
chr1	1303047	1303485
chr1	1304066	1304505
chr1	1304573	1304883
chr1	1304910	1305078
chr1	1305109	1305729
chr1	1305764	1306031
chr1	1306312	1306886
chr1	1307468	1309189
chr1	1309478	1310120
chr1	1310469	1310765
chr1	1311288	1311933
chr1	1312283	1312465
chr1	1312790	1313024
chr1	1313682	1314165
chr1	1315457	1315671
chr1	1318272	1318483
chr1	1319084	1319449
chr1	1324180	1324484
chr1	1324512	1325105
chr1	1325525	1325757
chr1	1327068	1327365
chr1	1328050	1328286
chr1	1330329	1331782
chr1	1332300	1332572
chr1	1332726	1333407
chr1	1333686	1333886
chr1	1333929	1334540
chr1	1335843	1336090
chr1	1336314	1336697
chr1	1336733	1337276
chr1	1337281	1337687
chr1	1337867	1338225
chr1	1341401	1341798
chr1	1342333	1342586
chr1	1343396	1344517
chr1	1345289	1345515
chr1	1345816	1346594
chr1	1346716	1346943
chr1	1347575	1348075
chr1	1348225	1348477
chr1	1348678	1349161
chr1	1349180	1349966
chr1	1353213	1353883
chr1	1354236	1354660
chr1	1355135	1355779
chr1	1356210	1356426
chr1	1358885	1359216
chr1	1360627	1360867
chr1	1371969	1372343
chr1	1373702	1374181
chr1	1374524	1375536
chr1	1380646	1381041
chr1	1381116	1381399
chr1	1392936	1393265
chr1	1399050	1399748
chr1	1402177	1402456
chr1	1403433	1403660
chr1	1406826	1407214
chr1	1420141	1420780
chr1	1430323	1430595
chr1	1430873	1431320
chr1	1431793	1432115
chr1	1434077	1434252
chr1	1434980	1435199
chr1	1435463	1435824
chr1	1436396	1436710
chr1	1437040	1437325
chr1	1437885	1438013
chr1	1439128	1439336
chr1	1441528	1441795
chr1	1442271	1442680
chr1	1457177	1457471
chr1	1471616	1471840
chr1	1479781	1480007
chr1	1481789	1481986
chr1	1496023	1496525
chr1	1497074	1497281
chr1	1511926	1512129
chr1	1524815	1525223
chr1	1527454	1527748
chr1	1535339	1535641
chr1	1535767	1536030
chr1	1536090	1536409
chr1	1536440	1536685
chr1	1537248	1537677
chr1	1539427	1539706
chr1	1540205	1540482
chr1	1553973	1554252
chr1	1554806	1555207
chr1	1558127	1558506
chr1	1574390	1574994
chr1	1576228	1576585
chr1	1591384	1591940
chr1	1597607	1597853
chr1	1600103	1600557
chr1	1615236	1616405
chr1	1616530	1616917
chr1	1618576	1618859
chr1	1620929	1621233
chr1	1621688	1622204
chr1	1623176	1623507
chr1	1624707	1624954
chr1	1625022	1625244
chr1	1625667	1625973
chr1	1627268	1627610
chr1	1628226	1628819
chr1	1629085	1629312
chr1	1630861	1631403
chr1	1631688	1631913
chr1	1659054	1659253
chr1	1665988	1666206
chr1	1678937	1679123
chr1	1680381	1680580
chr1	1683245	1683462
chr1	1684229	1684532
chr1	1724372	1724573
chr1	1752169	1752424
chr1	1752793	1753180
chr1	1753560	1753791
chr1	1753912	1754142
chr1	1759805	1760252
chr1	1760411	1760637
chr1	1761779	1762015
chr1	1764350	1764656
chr1	1778318	1778793
chr1	1780379	1780586
chr1	1782313	1782844
chr1	1819789	1820062
chr1	1857397	1857639
chr1	1870485	1870820
chr1	1890662	1891209
chr1	1891602	1892172
chr1	1893475	1893763
chr1	1899805	1900020
chr1	1901717	1901921
chr1	1904495	1904732
chr1	1907285	1907589
chr1	1908461	1908735
chr1	1908878	1909792
chr1	1910540	1910689
chr1	1911566	1911804
chr1	1913913	1914215
chr1	1914309	1914484
chr1	1915074	1915469
chr1	1917351	1918018
chr1	1918762	1919045
chr1	1919265	1919855
chr1	1920196	1920798
chr1	1921059	1921290
chr1	1921387	1921689
chr1	1922399	1922661
chr1	1924485	1924927
chr1	1925741	1926054
chr1	1927745	1927935
chr1	1928670	1929063
chr1	1929858	1930214
chr1	1940135	1940475
chr1	1941173	1941381
chr1	1943914	1944419
chr1	1959480	1960249
chr1	1969864	1970173
chr1	1970573	1970929
chr1	1974056	1974344
chr1	1980421	1980874
chr1	1984529	1984809
chr1	1985509	1985823
chr1	2005030	2005331
chr1	2008078	2008305
chr1	2021303	2021683
chr1	2021958	2022231
chr1	2031325	2031659
chr1	2031940	2032192
chr1	2032930	2033244
chr1	2040631	2040806
chr1	2043578	2043812
chr1	2043936	2044234
chr1	2047071	2047403
chr1	2049628	2049868
chr1	2050097	2050540
chr1	2052478	2052736
chr1	2052876	2053057
chr1	2069865	2070182
chr1	2075131	2075486
chr1	2080614	2080763
chr1	2093238	2093494
chr1	2095920	2096150
chr1	2097197	2097380
chr1	2099193	2099520
chr1	2100879	2101069
chr1	2111211	2111536
chr1	2130588	2130775
chr1	2131294	2131655
chr1	2132973	2134053
chr1	2135812	2136067
chr1	2136968	2137322
chr1	2142595	2142783
chr1	2150589	2150861
chr1	2167488	2167643
chr1	2178624	2178899
chr1	2180975	2181369
chr1	2183858	2184223
chr1	2184999	2185612
chr1	2185762	2186113
chr1	2188938	2189367
chr1	2189410	2190240
chr1	2192429	2192735
chr1	2194835	2195276
chr1	2195429	2195580
chr1	2195675	2195981
chr1	2197285	2197427
chr1	2198734	2199816
chr1	2201036	2201364
chr1	2203110	2203255
chr1	2203572	2203866
chr1	2204552	2204944
chr1	2205184	2205707
chr1	2208503	2208806
chr1	2209448	2209673
chr1	2212098	2212358
chr1	2212669	2212935
chr1	2214714	2215187
chr1	2216253	2216419
chr1	2224037	2224351
chr1	2224809	2225056
chr1	2226946	2227263
chr1	2227392	2228288
chr1	2228330	2229570
chr1	2230015	2231557
chr1	2231598	2232257
chr1	2232523	2233875
chr1	2235227	2235580
chr1	2235944	2236184
chr1	2237096	2237257
chr1	2238821	2239026
chr1	2239703	2240125
chr1	2243191	2243655
chr1	2249682	2249939
chr1	2250050	2250409
chr1	2251322	2251672
chr1	2257122	2257396
chr1	2270759	2270980
chr1	2271493	2271694
chr1	2271968	2272172
chr1	2272662	2272859
chr1	2273309	2273613
chr1	2273722	2274085
chr1	2274310	2274711
chr1	2276381	2276671
chr1	2278931	2279069
chr1	2282524	2282951
chr1	2283249	2283913
chr1	2284174	2284394
chr1	2284553	2284799
chr1	2295237	2295585
chr1	2300165	2300338
chr1	2300566	2300902
chr1	2304273	2304578
chr1	2305058	2305267
chr1	2306542	2306735
chr1	2307306	2307595
chr1	2310399	2310732
chr1	2311285	2311601
chr1	2311693	2311898
chr1	2312612	2312895
chr1	2313527	2313787
chr1	2314270	2314796
chr1	2315345	2315505
chr1	2317478	2317721
chr1	2319742	2319961
chr1	2321559	2321898
chr1	2325839	2326052
chr1	2330098	2330229
chr1	2332813	2333080
chr1	2335603	2335755
chr1	2344492	2344762
chr1	2355579	2355739
chr1	2356448	2356650
chr1	2372922	2373172
chr1	2373637	2373875
chr1	2376459	2376712
chr1	2381791	2381951
chr1	2391155	2392056
chr1	2394653	2394856
chr1	2398642	2399015
chr1	2399214	2399581
chr1	2399616	2399804
chr1	2399938	2400099
chr1	2404963	2405256
chr1	2406782	2407371
chr1	2408643	2409064
chr1	2412377	2413303
chr1	2414072	2414539
chr1	2417014	2417331
chr1	2417550	2417943
chr1	2419026	2419320
chr1	2428180	2428924
chr1	2432488	2432870
chr1	2434561	2434802
chr1	2437321	2437523
chr1	2438216	2438452
chr1	2438989	2439211
chr1	2440198	2440446
chr1	2442870	2443137
chr1	2443427	2443744
chr1	2443819	2444050
chr1	2444593	2444993
chr1	2446225	2446456
chr1	2447461	2447844
chr1	2448514	2448790
chr1	2801447	2801838
chr1	2804438	2804721
chr1	2809071	2809504
chr1	2810265	2810522
chr1	2814290	2814566
chr1	2824071	2824356
chr1	2825659	2825927
chr1	2831901	2832229
chr1	2857819	2858005
chr1	2867813	2868010
chr1	2869527	2869759
chr1	2873588	2873751
chr1	2875924	2876088
chr1	2877925	2878199
chr1	2882235	2882436
chr1	2887501	2888126
chr1	2891566	2892136
chr1	2892726	2892936
chr1	2893672	2894016
chr1	2894116	2894390
chr1	2899909	2900203
chr1	2907550	2907883
chr1	2911112	2911398
chr1	2911652	2911844
chr1	2933544	2933805
chr1	2935473	2935664
chr1	2946220	2946433
chr1	2952528	2952922
chr1	2962584	2962759
chr1	2965974	2966276
chr1	2972231	2972520
chr1	2984998	2985218
chr1	3002971	3003239
chr1	3027440	3027596
chr1	3031125	3031367
chr1	3061668	3061876
chr1	3065966	3066243
chr1	3066888	3067380
chr1	3069790	3070014
chr1	3070718	3071321
chr1	3079720	3080035
chr1	3100174	3100350
chr1	3116770	3116987
chr1	3118959	3119167
chr1	3134272	3134524
chr1	3142909	3143182
chr1	3151572	3151897
chr1	3152953	3153269
chr1	3154112	3154328
chr1	3159258	3159475
chr1	3164820	3165361
chr1	3172879	3173005
chr1	3179228	3179505
chr1	3182672	3183124
chr1	3185311	3185464
chr1	3185852	3186048
chr1	3211303	3211562
chr1	3228053	3228428
chr1	3236135	3236407
chr1	3238879	3239020
chr1	3245961	3246235
chr1	3249701	3249969
chr1	3252090	3252339
chr1	3255673	3255865
chr1	3273161	3273399
chr1	3275843	3276238
chr1	3276296	3276446
chr1	3282339	3282527
chr1	3283224	3283420
chr1	3313204	3313553
chr1	3313726	3313978
chr1	3318996	3319279
chr1	3324215	3324401
chr1	3328196	3328447
chr1	3331106	3331273
chr1	3331883	3332138
chr1	3348711	3348913
chr1	3350488	3350744
chr1	3352007	3352243
chr1	3352800	3353056
chr1	3353569	3353766
chr1	3357305	3357500
chr1	3360266	3360605
chr1	3372058	3372298
chr1	3382441	3382674
chr1	3384850	3385179
chr1	3393233	3393632
chr1	3393756	3394337
chr1	3403505	3403820
chr1	3405986	3406233
chr1	3412114	3412308
chr1	3412437	3412632
chr1	3414578	3414793
chr1	3414956	3415148
chr1	3416331	3416617
chr1	3419109	3419257
chr1	3420075	3420480
chr1	3423670	3423978
chr1	3426638	3427113
chr1	3427824	3428102
chr1	3429975	3430219
chr1	3453034	3453727
chr1	3454618	3454911
chr1	3455553	3455790
chr1	3457156	3457603
chr1	3458225	3458380
chr1	3458907	3459474
chr1	3459789	3460182
chr1	3462801	3463001
chr1	3465690	3466001
chr1	3467335	3467590
chr1	3468016	3468281
chr1	3468676	3469125
chr1	3477620	3477863
chr1	3478000	3478646
chr1	3478969	3479234
chr1	3480236	3480460
chr1	3481254	3481566
chr1	3483290	3483474
chr1	3489408	3489662
chr1	3490356	3490624
chr1	3496197	3496611
chr1	3499619	3499976
chr1	3503570	3503719
chr1	3504241	3504540
chr1	3506108	3506333
chr1	3509595	3509952
chr1	3512012	3512293
chr1	3514532	3514683
chr1	3515398	3515793
chr1	3517701	3517941
chr1	3519759	3520025
chr1	3525817	3526113
chr1	3531056	3531541
chr1	3531636	3531829
chr1	3533422	3533906
chr1	3538645	3538740
chr1	3538892	3539091
chr1	3539997	3540275
chr1	3544219	3544507
chr1	3546212	3546474
chr1	3546807	3546943
chr1	3546947	3547334
chr1	3548686	3548886
chr1	3551158	3551345
chr1	3553968	3554305
chr1	3561377	3561585
chr1	3563295	3563448
chr1	3563868	3564318
chr1	3564870	3565140
chr1	3567517	3567847
chr1	3568123	3568318
chr1	3570724	3571050
chr1	3585037	3585222
chr1	3588811	3589006
chr1	3589121	3589464
chr1	3592342	3592655
chr1	3597900	3598079
chr1	3598118	3598382
chr1	3602308	3602670
chr1	3609510	3609743
chr1	3610403	3610708
chr1	3611950	3612252
chr1	3613986	3614271
chr1	3624525	3625292
chr1	3629732	3630011
chr1	3630054	3630396
chr1	3631182	3631517
chr1	3633410	3633564
chr1	3639656	3639899
chr1	3640130	3640417
chr1	3640670	3640825
chr1	3649776	3649923
chr1	3657610	3657913
chr1	3660269	3660542
chr1	3669728	3670007
chr1	3672138	3672495
chr1	3672598	3672773
chr1	3672943	3673175
chr1	3675543	3675900
chr1	3676780	3677005
chr1	3684183	3684351
chr1	3685484	3685667
chr1	3687277	3687577
chr1	3688126	3688375
chr1	3690113	3690462
chr1	3695290	3695731
chr1	3700900	3701092
chr1	3701362	3701606
chr1	3704760	3705165
chr1	3707599	3707813
chr1	3707964	3708414
chr1	3717343	3717583
chr1	3718076	3718407
chr1	3719923	3720182
chr1	3721627	3721869
chr1	3721959	3722352
chr1	3724273	3724630
chr1	3731803	3732101
chr1	3733174	3733348
chr1	3746972	3747316
chr1	3762153	3762351
chr1	3768797	3769129
chr1	3771713	3772601
chr1	3772678	3773216
chr1	3773943	3774095
chr1	3777277	3777647
chr1	3782952	3783094
chr1	3790135	3790275
chr1	3795767	3796049
chr1	3796307	3796521
chr1	3799673	3799906
chr1	3816383	3816607
chr1	3856792	3857594
chr1	3857766	3858042
chr1	3870663	3870916
chr1	3896448	3896664
chr1	3900077	3900293
chr1	3900563	3900722
chr1	3900773	3901107
chr1	3916432	3916638
chr1	3924728	3924866
chr1	3926286	3926510
chr1	3940550	3940844
chr1	3945685	3945937
chr1	3946499	3946838
chr1	3978262	3978464
chr1	3997268	3997550
chr1	4046660	4046975
chr1	4052922	4053230
chr1	4055358	4055507
chr1	4127461	4127743
chr1	4161715	4161927
chr1	4166841	4167121
chr1	4171028	4171400
chr1	4203026	4203251
chr1	4310322	4310601
chr1	4328737	4329007
chr1	4334026	4334292
chr1	4361167	4361367
chr1	4463650	4463822
chr1	4477285	4477434
chr1	4528260	4528620
chr1	4553883	4554149
chr1	4607420	4607713
chr1	4631455	4631695
chr1	4653020	4653390
chr1	4654021	4654279
chr1	4659907	4660101
chr1	4682929	4683161
chr1	4693048	4693293
chr1	4695172	4695381
chr1	4696794	4696952
chr1	4707160	4707340
chr1	4711249	4711567
chr1	4712108	4712376
chr1	4720279	4720603
chr1	4834295	4834572
chr1	4870631	4870835
chr1	4871649	4871912
chr1	4912382	4912684
chr1	4927847	4928088
chr1	5009648	5009899
chr1	5207548	5207766
chr1	5217171	5217605
chr1	5221301	5221555
chr1	5265208	5265384
chr1	5266236	5266672
chr1	5275867	5276037
chr1	5293436	5293687
chr1	5333627	5333908
chr1	5362570	5362972
chr1	5403247	5403548
chr1	5427110	5427424
chr1	5450817	5451098
chr1	5454683	5454908
chr1	5508911	5509187
chr1	5531231	5531427
chr1	5576065	5576435
chr1	5577910	5578094
chr1	5596859	5597115
chr1	5611738	5611968
chr1	5650343	5650614
chr1	5664931	5665127
chr1	5724941	5725181
chr1	5730437	5730793
chr1	5745892	5746426
chr1	5746891	5747205
chr1	5759065	5759195
chr1	5773715	5774020
chr1	5828082	5828346
chr1	5831768	5832103
chr1	5833980	5834196
chr1	5838804	5839011
chr1	5847216	5847525
chr1	5850320	5850637
chr1	5855185	5855464
chr1	5860480	5860741
chr1	5863142	5863411
chr1	5880902	5881151
chr1	5881664	5881952
chr1	5882487	5882738
chr1	5883463	5883708
chr1	5887299	5887600
chr1	5888232	5888505
chr1	5905403	5905735
chr1	5910178	5910369
chr1	5937971	5938184
chr1	5969386	5969631
chr1	5971547	5971873
chr1	5979316	5979533
chr1	5980707	5981085
chr1	5989023	5989250
chr1	5990773	5990941
chr1	5991434	5991637
chr1	5991717	5991946
chr1	5992208	5992705
chr1	5994920	5995148
chr1	5998795	5998996
chr1	6002544	6003050
chr1	6006808	6007204
chr1	6025920	6026083
chr1	6028086	6028398
chr1	6036771	6037003
chr1	6045738	6045976
chr1	6046695	6046932
chr1	6053373	6053742
chr1	6059959	6060236
chr1	6065230	6065509
chr1	6066138	6066611
chr1	6089065	6089235
chr1	6093538	6093697
chr1	6096629	6096827
chr1	6122083	6122309
chr1	6125229	6125474
chr1	6125951	6126099
chr1	6128838	6128963
chr1	6130010	6130332
chr1	6136418	6136659
chr1	6141480	6141705
chr1	6146171	6146398
chr1	6147128	6147411
chr1	6151742	6151894
chr1	6152166	6152407
chr1	6167649	6167832
chr1	6173966	6174256
chr1	6177532	6177862
chr1	6178496	6178769
chr1	6178823	6179353
chr1	6179441	6179795
chr1	6199074	6199395
chr1	6199467	6199771
chr1	6200059	6200364
chr1	6204912	6205313
chr1	6205819	6206188
chr1	6207498	6207830
chr1	6207982	6208189
chr1	6210697	6211331
chr1	6225752	6225936
chr1	6235562	6236090
chr1	6238552	6238740
chr1	6243536	6243795
chr1	6244021	6244256
chr1	6248697	6249061
chr1	6249774	6250078
chr1	6250126	6250304
chr1	6259636	6260291
chr1	6260823	6261508
chr1	6262914	6263296
chr1	6265361	6265744
chr1	6273227	6273491
chr1	6277135	6277288
chr1	6278499	6278666
chr1	6279778	6280231
chr1	6280796	6281054
chr1	6285438	6285637
chr1	6291333	6291700
chr1	6325578	6325774
chr1	6337059	6337285
chr1	6338410	6338745
chr1	6339287	6339496
chr1	6344136	6344428
chr1	6345408	6345673
chr1	6348900	6349225
chr1	6393079	6394222
chr1	6416846	6417136
chr1	6419031	6419302
chr1	6419773	6420099
chr1	6420779	6421044
chr1	6422873	6423059
chr1	6424362	6424648
chr1	6425367	6425689
chr1	6460323	6460560
chr1	6467385	6467720
chr1	6468277	6468526
chr1	6469405	6469594
chr1	6479820	6480064
chr1	6485096	6485332
chr1	6485735	6486212
chr1	6490001	6490155
chr1	6494989	6495248
chr1	6497052	6497705
chr1	6502646	6502894
chr1	6505385	6505673
chr1	6508180	6508352
chr1	6515690	6515984
chr1	6525873	6526248
chr1	6526767	6527016
chr1	6549217	6549550
chr1	6562367	6562658
chr1	6571576	6571884
chr1	6574315	6574636
chr1	6574866	6575266
chr1	6578408	6578687
chr1	6579548	6579888
chr1	6579980	6580159
chr1	6580795	6581158
chr1	6586063	6586451
chr1	6586482	6586666
chr1	6588249	6588822
chr1	6589679	6589995
chr1	6597129	6597390
chr1	6602577	6602820
chr1	6602943	6603291
chr1	6613269	6613827
chr1	6614459	6614704
chr1	6617743	6617946
chr1	6618546	6618790
chr1	6621699	6621931
chr1	6624708	6625112
chr1	6625130	6625625
chr1	6626087	6626300
chr1	6634435	6634603
chr1	6634784	6634935
chr1	6645772	6646089
chr1	6668676	6668927
chr1	6675254	6675520
chr1	6700354	6700719
chr1	6701778	6702003
chr1	6708812	6708998
chr1	6784449	6785520
chr1	6786061	6786211
chr1	6908099	6908324
chr1	6953377	6953526
chr1	6962635	6962839
chr1	6962868	6963256
chr1	6963956	6964453
chr1	6968160	6968360
chr1	6974436	6974682
chr1	7025121	7025496
chr1	7051359	7051580
chr1	7052516	7052788
chr1	7065716	7065952
chr1	7072575	7072933
chr1	7093973	7094222
chr1	7117745	7118237
chr1	7172861	7173134
chr1	7175808	7176174
chr1	7185402	7185701
chr1	7224964	7225182
chr1	7236787	7237090
chr1	7250693	7250929
chr1	7266060	7266294
chr1	7291373	7291594
chr1	7298760	7298983
chr1	7351081	7351471
chr1	7356937	7357286
chr1	7378507	7378812
chr1	7404003	7404368
chr1	7433182	7433388
chr1	7434007	7434312
chr1	7437372	7437673
chr1	7444528	7444749
chr1	7447233	7447551
chr1	7473020	7473200
chr1	7479569	7479880
chr1	7498643	7498856
chr1	7549995	7550298
chr1	7551171	7551417
chr1	7552410	7552565
chr1	7554030	7554338
chr1	7566772	7566970
chr1	7613323	7613577
chr1	7617004	7617233
chr1	7640466	7640639
chr1	7641063	7641295
chr1	7648828	7649223
chr1	7655850	7656090
chr1	7663958	7664276
chr1	7666330	7666534
chr1	7667329	7667755
chr1	7704627	7705182
chr1	7718089	7718419
chr1	7770611	7770813
chr1	7770985	7771634
chr1	7783844	7784431
chr1	7876612	7876754
chr1	7961416	7962038
chr1	7984902	7985288
chr1	8002917	8003291
chr1	8014380	8014732
chr1	8026053	8026535
chr1	8026590	8026924
chr1	8035128	8035373
chr1	8083807	8084013
chr1	8125671	8125958
chr1	8131683	8132118
chr1	8184002	8184188
chr1	8190606	8190944
chr1	8252894	8253076
chr1	8256064	8256384
chr1	8321469	8321715
chr1	8328244	8328405
chr1	8349546	8349903
chr1	8356223	8356610
chr1	8360160	8360385
chr1	8360646	8361060
chr1	8382231	8382429
chr1	8423800	8424021
chr1	8424157	8424505
chr1	8434449	8434696
chr1	8460924	8461135
chr1	8488199	8488361
chr1	8493610	8493819
chr1	8584625	8584895
chr1	8601222	8601403
chr1	8685057	8685247
chr1	8686693	8686860
chr1	8686962	8687154
chr1	8702927	8703360
chr1	8811678	8811917
chr1	8815020	8815340
chr1	8858357	8858793
chr1	8878112	8879240
chr1	8923100	8923325
chr1	8927027	8927197
chr1	8939634	8939914
chr1	8940225	8940462
chr1	8957727	8958047
chr1	8989214	8989551
chr1	9021296	9021677
chr1	9038715	9039078
chr1	9039215	9039498
chr1	9039967	9040190
chr1	9055573	9055839
chr1	9099693	9100124
chr1	9103737	9103848
chr1	9143227	9143521
chr1	9145122	9145353
chr1	9146765	9147069
chr1	9162227	9162486
chr1	9162923	9163204
chr1	9174027	9174239
chr1	9182920	9183421
chr1	9185905	9186207
chr1	9207100	9207319
chr1	9225428	9225679
chr1	9234381	9235031
chr1	9236691	9237100
chr1	9250957	9251211
chr1	9263515	9263855
chr1	9270521	9270743
chr1	9276860	9277125
chr1	9293367	9293644
chr1	9294776	9294996
chr1	9297791	9297952
chr1	9314967	9315371
chr1	9321097	9321460
chr1	9322126	9322385
chr1	9326306	9326530
chr1	9327460	9327709
chr1	9328766	9329114
chr1	9355502	9355923
chr1	9360746	9361101
chr1	9368337	9368526
chr1	9369576	9369899
chr1	9378251	9378448
chr1	9386421	9386846
chr1	9392735	9392971
chr1	9428738	9429129
chr1	9432626	9432814
chr1	9480033	9480200
chr1	9487010	9487456
chr1	9528323	9528515
chr1	9536251	9536458
chr1	9539087	9539988
chr1	9541350	9541515
chr1	9549130	9549313
chr1	9576481	9576700
chr1	9588506	9588857
chr1	9588908	9589106
chr1	9590035	9590300
chr1	9590510	9590715
chr1	9591371	9591570
chr1	9602596	9602842
chr1	9604869	9605258
chr1	9607238	9607488
chr1	9612873	9613045
chr1	9613217	9613451
chr1	9627067	9627433
chr1	9630300	9630560
chr1	9631336	9631758
chr1	9651997	9652292
chr1	9689220	9689479
chr1	9715833	9716115
chr1	9716663	9716945
chr1	9722147	9722432
chr1	9724035	9724404
chr1	9729498	9729770
chr1	9737862	9738038
chr1	9749506	9749745
chr1	9791180	9791479
chr1	9823495	9824374
chr1	9825394	9825602
chr1	9844149	9844400
chr1	9870812	9871086
chr1	9874063	9874217
chr1	9877942	9878192
chr1	9878679	9878984
chr1	9884782	9885015
chr1	9890636	9890947
chr1	9909859	9910048
chr1	9910086	9910860
chr1	9929584	9929832
chr1	9939857	9940047
chr1	9943187	9943556
chr1	9944361	9944604
chr1	9985353	9985579
chr1	9997630	9997924
chr1	10032535	10033158
chr1	10033215	10033480
chr1	10059522	10059862
chr1	10114826	10115105
chr1	10198207	10198529
chr1	10210120	10210708
chr1	10210966	10211496
chr1	10250279	10250602
chr1	10252283	10252422
chr1	10360872	10361021
chr1	10384334	10384559
chr1	10398430	10398796
chr1	10398807	10399111
chr1	10399329	10399487
chr1	10399954	10400181
chr1	10430348	10430802
chr1	10432704	10432904
chr1	10445285	10445495
chr1	10463170	10463353
chr1	10468130	10468548
chr1	10474949	10475337
chr1	10475775	10476001
chr1	10508408	10508815
chr1	10530728	10531072
chr1	10532826	10532957
chr1	10622119	10622315
chr1	10629593	10629790
chr1	10631387	10631612
chr1	10633143	10633422
chr1	10635695	10635940
chr1	10637358	10637680
chr1	10642757	10642870
chr1	10642955	10643143
chr1	10652163	10652394
chr1	10652798	10653148
chr1	10653518	10653774
chr1	10655143	10655433
chr1	10656371	10656515
chr1	10657794	10658152
chr1	10663187	10663390
chr1	10674535	10674724
chr1	10676043	10676304
chr1	10679402	10679675
chr1	10680338	10680592
chr1	10682558	10682754
chr1	10693983	10694244
chr1	10694532	10694813
chr1	10702061	10702189
chr1	10704669	10704949
chr1	10705904	10706340
chr1	10715001	10715260
chr1	10719378	10719821
chr1	10719844	10720116
chr1	10727596	10727764
chr1	10727897	10728090
chr1	10737227	10737539
chr1	10739211	10739405
chr1	10753574	10753817
chr1	10762004	10762195
chr1	10765605	10765790
chr1	10788831	10789082
chr1	10806568	10806970
chr1	10809803	10810007
chr1	10816162	10816439
chr1	10817232	10817428
chr1	10835927	10836137
chr1	10856659	10856985
chr1	10863155	10863361
chr1	10866950	10867086
chr1	10867174	10867436
chr1	10868821	10869137
chr1	10874889	10875130
chr1	10877858	10878260
chr1	10890359	10891044
chr1	10898601	10898747
chr1	10900159	10900473
chr1	10901844	10902129
chr1	10912660	10913120
chr1	10920156	10920403
chr1	10938456	10938777
chr1	10946731	10946981
chr1	10954821	10955001
chr1	10959600	10960017
chr1	10976605	10977021
chr1	11012421	11012611
chr1	11013136	11013444
chr1	11045875	11046100
chr1	11053348	11053544
chr1	11053847	11054230
chr1	11055419	11055573
chr1	11056521	11056708
chr1	11058940	11059211
chr1	11059399	11059662
chr1	11059979	11060508
chr1	11061853	11062216
chr1	11067588	11068035
chr1	11069385	11069605
chr1	11099838	11100116
chr1	11172129	11172381
chr1	11176609	11176914
chr1	11256089	11256369
chr1	11262502	11262884
chr1	11272813	11273098
chr1	11273117	11273687
chr1	11295423	11295653
chr1	11321558	11321734
chr1	11334346	11334534
chr1	11338298	11338533
chr1	11350601	11350879
chr1	11369862	11370124
chr1	11421625	11421822
chr1	11426528	11426872
chr1	11439711	11440104
chr1	11446556	11447041
chr1	11454048	11454381
chr1	11456407	11456639
chr1	11478248	11478528
chr1	11478891	11479132
chr1	11515552	11515868
chr1	11530033	11530194
chr1	11531490	11531829
chr1	11535086	11535298
chr1	11535557	11535882
chr1	11540664	11540870
chr1	11555296	11555541
chr1	11571179	11571512
chr1	11584582	11584810
chr1	11597715	11597965
chr1	11629596	11629910
chr1	11653264	11653595
chr1	11654864	11655230
chr1	11656703	11656903
chr1	11658358	11658661
chr1	11663503	11663801
chr1	11672985	11673242
chr1	11677054	11677414
chr1	11677525	11677822
chr1	11681113	11681336
chr1	11700631	11700872
chr1	11709441	11709753
chr1	11714861	11715256
chr1	11716125	11716426
chr1	11729571	11729888
chr1	11738572	11738756
chr1	11739937	11740322
chr1	11745646	11745942
chr1	11749008	11749487
chr1	11749524	11749729
chr1	11753612	11753900
chr1	11775511	11775759
chr1	11778907	11779151
chr1	11783997	11784197
chr1	11788545	11788896
chr1	11791649	11791915
chr1	11802857	11803126
chr1	11803848	11804086
chr1	11805570	11806395
chr1	11822909	11823127
chr1	11874340	11874848
chr1	11878465	11878757
chr1	11907786	11908015
chr1	11908384	11909360
chr1	11914434	11914636
chr1	11918275	11918477
chr1	11918983	11919262
chr1	11934347	11934725
chr1	11938166	11938483
chr1	11949468	11949747
chr1	11954548	11954759
chr1	11954900	11955074
chr1	11957653	11957903
chr1	11970628	11970885
chr1	11980076	11980646
chr1	11986039	11986336
chr1	12022003	12022254
chr1	12031213	12031446
chr1	12032384	12032568
chr1	12040872	12041093
chr1	12067986	12068312
chr1	12082087	12082299
chr1	12125780	12125977
chr1	12139471	12139620
chr1	12145457	12145736
chr1	12145829	12146118
chr1	12151034	12151277
chr1	12168543	12168695
chr1	12180631	12180804
chr1	12186055	12186332
chr1	12210792	12211074
chr1	12212749	12213075
chr1	12231001	12231168
chr1	12276602	12276779
chr1	12430828	12431056
chr1	12478234	12478498
chr1	12540018	12540726
chr1	12547580	12547896
chr1	12555784	12555916
chr1	12570530	12570771
chr1	12578641	12578936
chr1	12605328	12605742
chr1	12612386	12612591
chr1	12618557	12618708
chr1	12644465	12644744
chr1	12649320	12649650
chr1	12678595	12678749
chr1	12684078	12684444
chr1	12695000	12695228
chr1	12715422	12715753
chr1	12760564	12760831
chr1	12770768	12771103
chr1	13513363	13513610
chr1	13514018	13514292
chr1	13538666	13538897
chr1	13551954	13552170
chr1	13559058	13559400
chr1	13654164	13654414
chr1	13700392	13700668
chr1	13749128	13749347
chr1	13763748	13763998
chr1	13764598	13764740
chr1	13807114	13807345
chr1	13811801	13812086
chr1	13812702	13812877
chr1	13855756	13856017
chr1	13872535	13872898
chr1	13929080	13929281
chr1	13947761	13948014
chr1	13959879	13960066
chr1	14067891	14068120
chr1	14100277	14100516
chr1	14264086	14264294
chr1	14381004	14381349
chr1	14423227	14423608
chr1	14426558	14426866
chr1	14430524	14430781
chr1	14448327	14448549
chr1	14460576	14460796
chr1	14518607	14518901
chr1	14566026	14566238
chr1	14591427	14591521
chr1	14598152	14598558
chr1	14686894	14687108
chr1	14707424	14707753
chr1	14736538	14736913
chr1	14767647	14767890
chr1	14793111	14793517
chr1	14839327	14839596
chr1	14852218	14852532
chr1	14854094	14854290
chr1	14861653	14861862
chr1	14867914	14868069
chr1	14910991	14911177
chr1	14913716	14914034
chr1	14924615	14924945
chr1	14930312	14930683
chr1	14934740	14935127
chr1	14940334	14940648
chr1	14940968	14941282
chr1	14947367	14947589
chr1	14949351	14949503
chr1	14953247	14953565
chr1	14959146	14959445
chr1	14976598	14976801
chr1	14994147	14994491
chr1	15003118	15003349
chr1	15004577	15004740
chr1	15007152	15007414
chr1	15007446	15007704
chr1	15065705	15065931
chr1	15073273	15073597
chr1	15101635	15101852
chr1	15122438	15122662
chr1	15152503	15152724
chr1	15153569	15154057
chr1	15174372	15174528
chr1	15188528	15188730
chr1	15246968	15247363
chr1	15384335	15384488
chr1	15409808	15410171
chr1	15411209	15411425
chr1	15411947	15412180
chr1	15417447	15417579
chr1	15431057	15431275
chr1	15432597	15432964
chr1	15433630	15433902
chr1	15435500	15435744
chr1	15440018	15440239
chr1	15441260	15441430
chr1	15493445	15493667
chr1	15502295	15502581
chr1	15506786	15507118
chr1	15516698	15516972
chr1	15519658	15519867
chr1	15523927	15525175
chr1	15525200	15525525
chr1	15526485	15526816
chr1	15526842	15527360
chr1	15568475	15568727
chr1	15584884	15585183
chr1	15617154	15617837
chr1	15624320	15624716
chr1	15680168	15680421
chr1	15683034	15683378
chr1	15684201	15684900
chr1	15716542	15716784
chr1	15735059	15735366
chr1	15736379	15736864
chr1	15738324	15738608
chr1	15746555	15746771
chr1	15747390	15747663
chr1	15747755	15747905
chr1	15757280	15757620
chr1	15761000	15761222
chr1	15788862	15789254
chr1	15791664	15791914
chr1	15832812	15833387
chr1	15834543	15834693
chr1	15834972	15835184
chr1	15835793	15836109
chr1	15847229	15847905
chr1	15848022	15848664
chr1	15849271	15849750
chr1	15849769	15850223
chr1	15850805	15851020
chr1	15873847	15874110
chr1	15932824	15933356
chr1	15934391	15934833
chr1	15936137	15936341
chr1	15937449	15937646
chr1	15942156	15942481
chr1	15942981	15943503
chr1	15943746	15944000
chr1	15950508	15950954
chr1	15957337	15957499
chr1	15999312	15999523
chr1	16005164	16005550
chr1	16006068	16006301
chr1	16014380	16014598
chr1	16017303	16017687
chr1	16023388	16023730
chr1	16028213	16028711
chr1	16041511	16041689
chr1	16049261	16049476
chr1	16050237	16050475
chr1	16081703	16082043
chr1	16082249	16082600
chr1	16082746	16082951
chr1	16088819	16089185
chr1	16091515	16091816
chr1	16092536	16092897
chr1	16094858	16095117
chr1	16133049	16133316
chr1	16139069	16139371
chr1	16145130	16145333
chr1	16150995	16151192
chr1	16151647	16151934
chr1	16151950	16152297
chr1	16155838	16156195
chr1	16170030	16170200
chr1	16183512	16183836
chr1	16186494	16186735
chr1	16188433	16188637
chr1	16204925	16205217
chr1	16205877	16206072
chr1	16206338	16206550
chr1	16206593	16206739
chr1	16206775	16207199
chr1	16207681	16207885
chr1	16208077	16208416
chr1	16212020	16212234
chr1	16212635	16212936
chr1	16216277	16216432
chr1	16217323	16217612
chr1	16226817	16227056
chr1	16231390	16231727
chr1	16237204	16237422
chr1	16272571	16272812
chr1	16352206	16352698
chr1	16358973	16359232
chr1	16366964	16367081
chr1	16367220	16367700
chr1	16376015	16376194
chr1	16391945	16392196
chr1	16399567	16399882
chr1	16401890	16402099
chr1	16409762	16410142
chr1	16415282	16415482
chr1	16440380	16440918
chr1	16452787	16453054
chr1	16498851	16499089
chr1	16613336	16613974
chr1	16718625	16719079
chr1	16913786	16914513
chr1	16915243	16915587
chr1	16925868	16926200
chr1	16926247	16926619
chr1	16927497	16927936
chr1	16958520	16958675
chr1	16963449	16963617
chr1	16979135	16979344
chr1	16985128	16985321
chr1	16986748	16986909
chr1	16993679	16993876
chr1	17000448	17000742
chr1	17000990	17001252
chr1	17001892	17002405
chr1	17010419	17010915
chr1	17011213	17011593
chr1	17011601	17011856
chr1	17053847	17054200
chr1	17102052	17102373
chr1	17114187	17114502
chr1	17160375	17160548
chr1	17162987	17163223
chr1	17165271	17165564
chr1	17190139	17190381
chr1	17198651	17198827
chr1	17206345	17206650
chr1	17223229	17223458
chr1	17225311	17225506
chr1	17230752	17230958
chr1	17235671	17235911
chr1	17241279	17241467
chr1	17270703	17270977
chr1	17307857	17308177
chr1	17340205	17340355
chr1	17371636	17371962
chr1	17406003	17406730
chr1	17412056	17412272
chr1	17437693	17438089
chr1	17438455	17439071
chr1	17439730	17439980
chr1	17520201	17520598
chr1	17539639	17539854
chr1	17569052	17569385
chr1	17572864	17573106
chr1	17587117	17587304
chr1	17588327	17588683
chr1	17589903	17590145
chr1	17595500	17595847
chr1	17596563	17596917
chr1	17599659	17599851
chr1	17603087	17603432
chr1	17618483	17618780
chr1	17619573	17619799
chr1	17632337	17632553
chr1	17632695	17632969
chr1	17637848	17638178
chr1	17640784	17640983
chr1	17656397	17656768
chr1	17659394	17659590
chr1	17661501	17661667
chr1	17664390	17664609
chr1	17666266	17666614
chr1	17668278	17668435
chr1	17690467	17690715
chr1	17741764	17741944
chr1	17752137	17752361
chr1	17774964	17775303
chr1	17789395	17789628
chr1	17791183	17791487
chr1	17800684	17800888
chr1	17808662	17808918
chr1	17821381	17821673
chr1	17822393	17822563
chr1	17908493	17908804
chr1	17931072	17931381
chr1	17971245	17971387
chr1	18011020	18011167
chr1	18041080	18041329
chr1	18081569	18081736
chr1	18104477	18104744
chr1	18117912	18118075
chr1	18129599	18129985
chr1	18146879	18147131
chr1	18149067	18149348
chr1	18191956	18192223
chr1	18241732	18241968
chr1	18287921	18288062
chr1	18290177	18290368
chr1	18292404	18292714
chr1	18329762	18330236
chr1	18349986	18350134
chr1	18368044	18368291
chr1	18382871	18383099
chr1	18408707	18408993
chr1	18440901	18441150
chr1	18465444	18465751
chr1	18466827	18467062
chr1	18468159	18468519
chr1	18547976	18548409
chr1	18562103	18562362
chr1	18564653	18564991
chr1	18573112	18573475
chr1	18582521	18582710
chr1	18593852	18594124
chr1	18597337	18597539
chr1	18626845	18627065
chr1	18636363	18636648
chr1	18643560	18643767
chr1	18648454	18648747
chr1	18650463	18650734
chr1	18674494	18674728
chr1	18711653	18711921
chr1	18728016	18728187
chr1	18762270	18762481
chr1	18780685	18781054
chr1	18798675	18799042
chr1	18805914	18806086
chr1	18806240	18806390
chr1	18820514	18820779
chr1	18862253	18862428
chr1	18865463	18865990
chr1	18875129	18875479
chr1	18876406	18876659
chr1	18876935	18877209
chr1	18877742	18878050
chr1	18879938	18880211
chr1	18882369	18882796
chr1	18886902	18887079
chr1	18887160	18887347
chr1	18901303	18901517
chr1	18902522	18902906
chr1	18907059	18907244
chr1	18912950	18913241
chr1	18918381	18918656
chr1	18918849	18919107
chr1	18919649	18920014
chr1	18926577	18926913
chr1	18927288	18927531
chr1	18933129	18933376
chr1	18937674	18937917
chr1	18954791	18955054
chr1	18956374	18956995
chr1	18975461	18975839
chr1	19009847	19010200
chr1	19041847	19042218
chr1	19057832	19057977
chr1	19073793	19074101
chr1	19087313	19087418
chr1	19092835	19093069
chr1	19130099	19130363
chr1	19209805	19210640
chr1	19240374	19240767
chr1	19241414	19241667
chr1	19242719	19243012
chr1	19251542	19251736
chr1	19260169	19260444
chr1	19262609	19262906
chr1	19268826	19269032
chr1	19271832	19272056
chr1	19273600	19273835
chr1	19308944	19309192
chr1	19311883	19312657
chr1	19314826	19315187
chr1	19315925	19316191
chr1	19335488	19335874
chr1	19343188	19343417
chr1	19348714	19348986
chr1	19362313	19362619
chr1	19369909	19370225
chr1	19374385	19374667
chr1	19396012	19396190
chr1	19485183	19486085
chr1	19487008	19487290
chr1	19516631	19516899
chr1	19621348	19621542
chr1	19635708	19635947
chr1	19665451	19665761
chr1	19677661	19677940
chr1	19684567	19684826
chr1	19699405	19699635
chr1	19704736	19704974
chr1	19715696	19715919
chr1	19725747	19726109
chr1	19759741	19760007
chr1	19762441	19762677
chr1	19769581	19769943
chr1	19799000	19799385
chr1	19814621	19815122
chr1	19882297	19882579
chr1	19979491	19979749
chr1	19995306	19995666
chr1	20071981	20072312
chr1	20114000	20114152
chr1	20140010	20140304
chr1	20143901	20144097
chr1	20152305	20152666
chr1	20263989	20264182
chr1	20283904	20284218
chr1	20290797	20291124
chr1	20296007	20296244
chr1	20322084	20322510
chr1	20350432	20350693
chr1	20375325	20375583
chr1	20401591	20401907
chr1	20404150	20404549
chr1	20418865	20419092
chr1	20430873	20431066
chr1	20462598	20462860
chr1	20488337	20488649
chr1	20492529	20492872
chr1	20498332	20498800
chr1	20535408	20535753
chr1	20551171	20551383
chr1	20552886	20553648
chr1	20633715	20634021
chr1	20636952	20637092
chr1	20637728	20638085
chr1	20641709	20642063
chr1	20652889	20653045
chr1	20661386	20661637
chr1	20661724	20661958
chr1	20671120	20671409
chr1	20696858	20697271
chr1	20700649	20700832
chr1	20704379	20704604
chr1	20717500	20718066
chr1	20722759	20722927
chr1	20729346	20729647
chr1	20731857	20732417
chr1	20732558	20732963
chr1	20786407	20786616
chr1	20786709	20787097
chr1	20787135	20787741
chr1	20861943	20862143
chr1	20942167	20942448
chr1	21044681	21044984
chr1	21208203	21208514
chr1	21213621	21213813
chr1	21217271	21217464
chr1	21222133	21222336
chr1	21242335	21242673
chr1	21262155	21262401
chr1	21277414	21277609
chr1	21301903	21302136
chr1	21317413	21317732
chr1	21318651	21318935
chr1	21321848	21322218
chr1	21322815	21322997
chr1	21344792	21345000
chr1	21345342	21345624
chr1	21491360	21491656
chr1	21504189	21504369
chr1	21509151	21509554
chr1	21525349	21525638
chr1	21540027	21540323
chr1	21540399	21540636
chr1	21570354	21570736
chr1	21587769	21588122
chr1	21593090	21593381
chr1	21593449	21593806
chr1	21594055	21594509
chr1	21596303	21596536
chr1	21597634	21598085
chr1	21598501	21598892
chr1	21599195	21599448
chr1	21600975	21601229
chr1	21602375	21602738
chr1	21606185	21606354
chr1	21608045	21608389
chr1	21619858	21620191
chr1	21622265	21622479
chr1	21623863	21624208
chr1	21639892	21640335
chr1	21649868	21650062
chr1	21655292	21655925
chr1	21663724	21663946
chr1	21668007	21668232
chr1	21669679	21669898
chr1	21714400	21714682
chr1	21739073	21739306
chr1	21782883	21783179
chr1	21811771	21812044
chr1	21826764	21826936
chr1	21828581	21828914
chr1	21841001	21841223
chr1	21841273	21841509
chr1	21841881	21842033
chr1	21851925	21852183
chr1	21853132	21853475
chr1	21870374	21870761
chr1	21870923	21871152
chr1	21872530	21872757
chr1	21880803	21881044
chr1	21886952	21887267
chr1	21887565	21887783
chr1	21906178	21906412
chr1	21909511	21909721
chr1	21911553	21911792
chr1	21927319	21927533
chr1	21935936	21936153
chr1	21936566	21936813
chr1	21936998	21937143
chr1	21937420	21937721
chr1	21940412	21940575
chr1	21944248	21944494
chr1	22027453	22027686
chr1	22048409	22048640
chr1	22049293	22049492
chr1	22052526	22052750
chr1	22124120	22124430
chr1	22132010	22132372
chr1	22136460	22136775
chr1	22137681	22138080
chr1	22141644	22141898
chr1	22142428	22142705
chr1	22143181	22143454
chr1	22143780	22143957
chr1	22154307	22154527
chr1	22157445	22157671
chr1	22160068	22160388
chr1	22182114	22182318
chr1	22225974	22226186
chr1	22248877	22249112
chr1	22260891	22261059
chr1	22262306	22262890
chr1	22264040	22264476
chr1	22268683	22268952
chr1	22275994	22276445
chr1	22285282	22285627
chr1	22287891	22288235
chr1	22313163	22313474
chr1	22320423	22320732
chr1	22329931	22330285
chr1	22345003	22345170
chr1	22351687	22351942
chr1	22408719	22409004
chr1	22451902	22452274
chr1	22483170	22483508
chr1	22487815	22488157
chr1	22505845	22506021
chr1	22545128	22545336
chr1	22556808	22557042
chr1	22586468	22586665
chr1	22588348	22588559
chr1	22593469	22593827
chr1	22634747	22635293
chr1	22658629	22658888
chr1	22670715	22670990
chr1	22673268	22673502
chr1	22710684	22710987
chr1	22711938	22712137
chr1	22716253	22716644
chr1	22717161	22717500
chr1	22726777	22726984
chr1	22728947	22729113
chr1	22777498	22777730
chr1	22783559	22783792
chr1	22785497	22785867
chr1	22790075	22790375
chr1	22803019	22803419
chr1	22810514	22810811
chr1	22816128	22816311
chr1	22818400	22818814
chr1	22824670	22824907
chr1	22830817	22831133
chr1	22832442	22832626
chr1	22837032	22837230
chr1	22853539	22853709
chr1	22856229	22856463
chr1	22860530	22860858
chr1	22869403	22869623
chr1	22880328	22880507
chr1	22884887	22885095
chr1	22894221	22894382
chr1	22912145	22912553
chr1	22918227	22918469
chr1	22930218	22930581
chr1	22953450	22953748
chr1	22960979	22961187
chr1	22982171	22982380
chr1	23019296	23019772
chr1	23088551	23088858
chr1	23089071	23089290
chr1	23115853	23116121
chr1	23140469	23140668
chr1	23163283	23163523
chr1	23167528	23168234
chr1	23168520	23169016
chr1	23177717	23178136
chr1	23191462	23191699
chr1	23193339	23193572
chr1	23216913	23217146
chr1	23338655	23338918
chr1	23343768	23344045
chr1	23344088	23344246
chr1	23344276	23344973
chr1	23368310	23368629
chr1	23368802	23369201
chr1	23420824	23421100
chr1	23433034	23433172
chr1	23451101	23451234
chr1	23477584	23477930
chr1	23481700	23481907
chr1	23483909	23484645
chr1	23491006	23491265
chr1	23498195	23498416
chr1	23538360	23538551
chr1	23554462	23554882
chr1	23555056	23555273
chr1	23556387	23556602
chr1	23558321	23558647
chr1	23559345	23559641
chr1	23562401	23562627
chr1	23563921	23564060
chr1	23581259	23581564
chr1	23588429	23588731
chr1	23593274	23593433
chr1	23598524	23598717
chr1	23607430	23607668
chr1	23609562	23609764
chr1	23625172	23625344
chr1	23644861	23645068
chr1	23691630	23691936
chr1	23702867	23703242
chr1	23730325	23730640
chr1	23743441	23743646
chr1	23766537	23766692
chr1	23790884	23791220
chr1	23791510	23791907
chr1	23792246	23792429
chr1	23798515	23798764
chr1	23800304	23800567
chr1	23800626	23800988
chr1	23810562	23810984
chr1	23816540	23816720
chr1	23825277	23825536
chr1	23828796	23828996
chr1	23871388	23871705
chr1	23911311	23911568
chr1	23911574	23911815
chr1	23959294	23959461
chr1	23959642	23960047
chr1	23975749	23976111
chr1	23980078	23980470
chr1	23987089	23987401
chr1	23995903	23996043
chr1	24100197	24100459
chr1	24113612	24113841
chr1	24123992	24124354
chr1	24141200	24141464
chr1	24150554	24150799
chr1	24155378	24155610
chr1	24187056	24187443
chr1	24215437	24215716
chr1	24236332	24236602
chr1	24246784	24247033
chr1	24346480	24346687
chr1	24368313	24368558
chr1	24413595	24413839
chr1	24415592	24415857
chr1	24435148	24435417
chr1	24449324	24449633
chr1	24453236	24453445
chr1	24502457	24502782
chr1	24553176	24553421
chr1	24556320	24556561
chr1	24573060	24573201
chr1	24630363	24630592
chr1	24641104	24641418
chr1	24643189	24643510
chr1	24688887	24689079
chr1	24713533	24713841
chr1	24722092	24722348
chr1	24742583	24742943
chr1	24744862	24745436
chr1	24745512	24745829
chr1	24762565	24762924
chr1	24822020	24822332
chr1	24855605	24855828
chr1	24859905	24860068
chr1	24901922	24902284
chr1	24915527	24915766
chr1	24947701	24947891
chr1	24960139	24960419
chr1	24965798	24966047
chr1	25017398	25017632
chr1	25019829	25020176
chr1	25025183	25025435
chr1	25035481	25035798
chr1	25040088	25040226
chr1	25041246	25041405
chr1	25043037	25043483
chr1	25072634	25072877
chr1	25087681	25087961
chr1	25089047	25089316
chr1	25120717	25120969
[truncated: 75,004 more rows]

## Sheet: Supplementary Table 1c
Chr	Start	End
chr1	633966	634103
chr1	905627	906071
chr1	906636	906909
chr1	912324	913123
chr1	913177	913501
chr1	914256	914583
chr1	916921	917349
chr1	919905	920172
chr1	921636	922182
chr1	923460	925073
chr1	925121	925304
chr1	925426	925947
chr1	928457	928716
chr1	928767	929022
chr1	929435	929777
chr1	930523	931121
chr1	932617	933204
chr1	933309	933633
chr1	935003	935420
chr1	935491	936291
chr1	936483	937396
chr1	937838	939564
chr1	939638	940052
chr1	940301	942761
chr1	942905	943521
chr1	943560	944155
chr1	945461	945768
chr1	945832	946010
chr1	950224	950669
chr1	959193	959405
chr1	960469	961183
chr1	962130	962722
chr1	966059	966385
chr1	966608	967145
chr1	971185	971759
chr1	972795	973445
chr1	973613	974400
chr1	975119	975812
chr1	975889	976149
chr1	976188	976711
chr1	978545	979215
chr1	980169	980554
chr1	980643	981092
chr1	984269	984554
chr1	993639	993961
chr1	995554	995886
chr1	995967	996297
chr1	996841	997043
chr1	997370	998317
chr1	998499	999554
chr1	999611	1001473
chr1	1001623	1002056
chr1	1003227	1003828
chr1	1004045	1004767
chr1	1004809	1005814
chr1	1013403	1014035
chr1	1014850	1015185
chr1	1019196	1019950
chr1	1020100	1020513
chr1	1024149	1024412
chr1	1024472	1024883
chr1	1024988	1025543
chr1	1032761	1033262
chr1	1033968	1034690
chr1	1035385	1035841
chr1	1036350	1037064
chr1	1038898	1039481
chr1	1040099	1040485
chr1	1040616	1040970
chr1	1044197	1044887
chr1	1045343	1046355
chr1	1051616	1052527
chr1	1053320	1053980
chr1	1058868	1059219
chr1	1059383	1059894
chr1	1060547	1060937
chr1	1062967	1063373
chr1	1063845	1064580
chr1	1069075	1069617
chr1	1069728	1070149
chr1	1070418	1070723
chr1	1070891	1071131
chr1	1071506	1072129
chr1	1072761	1073086
chr1	1073789	1074360
chr1	1074789	1075773
chr1	1079421	1079687
chr1	1079728	1080086
chr1	1080339	1080596
chr1	1081102	1081534
chr1	1082150	1082468
chr1	1083485	1084040
chr1	1085058	1086443
chr1	1088344	1088729
chr1	1088831	1088998
chr1	1091330	1091661
chr1	1092319	1092701
chr1	1106798	1107290
chr1	1115760	1116714
chr1	1123598	1124402
chr1	1124542	1124902
chr1	1125049	1125419
chr1	1125593	1125985
chr1	1142416	1143149
chr1	1150696	1151042
chr1	1151271	1151704
chr1	1158454	1159015
chr1	1160557	1161001
chr1	1161081	1161568
chr1	1166576	1166972
chr1	1167190	1168315
chr1	1168959	1169527
chr1	1179699	1180490
chr1	1181285	1182029
chr1	1182968	1183314
chr1	1196473	1197152
chr1	1198940	1199330
chr1	1200796	1201210
chr1	1201381	1201856
chr1	1202731	1203051
chr1	1203118	1203877
chr1	1204783	1205643
chr1	1208251	1208745
chr1	1220168	1220587
chr1	1222698	1223153
chr1	1223308	1223741
chr1	1226695	1227105
chr1	1229639	1230029
chr1	1231396	1232770
chr1	1237295	1237833
chr1	1238382	1238877
chr1	1238921	1239351
chr1	1240292	1240571
chr1	1242749	1243717
chr1	1244016	1244471
chr1	1245325	1245970
chr1	1246172	1247494
chr1	1258237	1259032
chr1	1272261	1272816
chr1	1273498	1275028
chr1	1281340	1282029
chr1	1282982	1283469
chr1	1285141	1285512
chr1	1285824	1286372
chr1	1286680	1286971
chr1	1287130	1287412
chr1	1290718	1291381
chr1	1291573	1292188
chr1	1292854	1293259
chr1	1294600	1295185
chr1	1295313	1295848
chr1	1296056	1296540
chr1	1296619	1297136
chr1	1297942	1298511
chr1	1299453	1300257
chr1	1300338	1300728
chr1	1301797	1302078
chr1	1302188	1302385
chr1	1302549	1303362
chr1	1303686	1303848
chr1	1304505	1305430
chr1	1306205	1306473
chr1	1307428	1308849
chr1	1308954	1309274
chr1	1309484	1309927
chr1	1310087	1310579
chr1	1312225	1313480
chr1	1313570	1313830
chr1	1314107	1314522
chr1	1319356	1319646
chr1	1319713	1320479
chr1	1321121	1321460
chr1	1321505	1321861
chr1	1324334	1325348
chr1	1327830	1328243
chr1	1329176	1329737
chr1	1330588	1331138
chr1	1331355	1331733
chr1	1332582	1332921
chr1	1333001	1333249
chr1	1334057	1334361
chr1	1336150	1336989
chr1	1337984	1338134
chr1	1338953	1339115
chr1	1341425	1341851
chr1	1342191	1342615
chr1	1343259	1343499
chr1	1343984	1344884
chr1	1344996	1345659
chr1	1346433	1346694
chr1	1346927	1347492
chr1	1347652	1347860
chr1	1349105	1350010
chr1	1351431	1352095
chr1	1352286	1352614
chr1	1353566	1354636
chr1	1355352	1355784
chr1	1356787	1357112
chr1	1359719	1360504
chr1	1370813	1371535
chr1	1371618	1371854
chr1	1372249	1372509
chr1	1373606	1374273
chr1	1374910	1375678
chr1	1376047	1376892
chr1	1399030	1399255
chr1	1399922	1400529
chr1	1407175	1407436
chr1	1407512	1407747
chr1	1430393	1431071
chr1	1431689	1432591
chr1	1433595	1433902
chr1	1434991	1435710
chr1	1435753	1436150
chr1	1439676	1440376
chr1	1441313	1442380
chr1	1471422	1471790
chr1	1511507	1512342
chr1	1537642	1537877
chr1	1538402	1539064
chr1	1539124	1539573
chr1	1542071	1542556
chr1	1542824	1543397
chr1	1547169	1547974
chr1	1550424	1551237
chr1	1554616	1555263
chr1	1556442	1557049
chr1	1562537	1562958
chr1	1564537	1564744
chr1	1574071	1575025
chr1	1583544	1584031
chr1	1599341	1599936
chr1	1600172	1600617
chr1	1600903	1601151
chr1	1615016	1616584
chr1	1618533	1619269
chr1	1620115	1620450
chr1	1622310	1623005
chr1	1625954	1626408
chr1	1626945	1627235
chr1	1627312	1628098
chr1	1629409	1629768
chr1	1630995	1631825
chr1	1632079	1632351
chr1	1659040	1659373
chr1	1665654	1666125
chr1	1694319	1694689
chr1	1724355	1724684
chr1	1752901	1753178
chr1	1753412	1753790
chr1	1754287	1754681
chr1	1756197	1756656
chr1	1758158	1758554
chr1	1758873	1759717
chr1	1778070	1778526
chr1	1779002	1779574
chr1	1782033	1782579
chr1	1890610	1891429
chr1	1891493	1891992
chr1	1894613	1894984
chr1	1899640	1900179
chr1	1901382	1901778
chr1	1906760	1907698
chr1	1907862	1908573
chr1	1908821	1909578
chr1	1909692	1909973
chr1	1910583	1911076
chr1	1911470	1911986
chr1	1914245	1914743
chr1	1915890	1916608
chr1	1918784	1920171
chr1	1920567	1920810
chr1	1921519	1921799
chr1	1921888	1922347
chr1	1925167	1925921
chr1	1926514	1926727
chr1	1926762	1927100
chr1	1944045	1944441
chr1	1956694	1957119
chr1	1959732	1960491
chr1	1965526	1966380
chr1	1971127	1971861
chr1	1974217	1974729
chr1	2019234	2020200
chr1	2046244	2046816
chr1	2049321	2050629
chr1	2051170	2051680
chr1	2115035	2115517
chr1	2125391	2125819
chr1	2127337	2127904
chr1	2133009	2134094
chr1	2154107	2154530
chr1	2175684	2175916
chr1	2175985	2176173
chr1	2178104	2178428
chr1	2178923	2179259
chr1	2184467	2184998
chr1	2185108	2185640
chr1	2186037	2186484
chr1	2187566	2187918
chr1	2189478	2189870
chr1	2190593	2190948
chr1	2193819	2194299
chr1	2194543	2195502
chr1	2195637	2195924
chr1	2199149	2199741
chr1	2203211	2203754
chr1	2203890	2204444
chr1	2204454	2204678
chr1	2204737	2204898
chr1	2204988	2205108
chr1	2205177	2205710
chr1	2207135	2207473
chr1	2207554	2207936
chr1	2207981	2208278
chr1	2208450	2208933
chr1	2209425	2209736
chr1	2209783	2210506
chr1	2212332	2213226
chr1	2213560	2213814
chr1	2214015	2214153
chr1	2214259	2214445
chr1	2215409	2215703
chr1	2215838	2216133
chr1	2224628	2224919
chr1	2225007	2225196
chr1	2226765	2228410
chr1	2228460	2228644
chr1	2228892	2229568
chr1	2229909	2230712
chr1	2231656	2232166
chr1	2232244	2232579
chr1	2234363	2234712
chr1	2238049	2238539
chr1	2238579	2238875
chr1	2239417	2239700
chr1	2240086	2240722
chr1	2249395	2249720
chr1	2267912	2268753
chr1	2273420	2273832
chr1	2277810	2278078
chr1	2300244	2300702
chr1	2311036	2311769
chr1	2312210	2312503
chr1	2313503	2313981
chr1	2314157	2314653
chr1	2315106	2315354
chr1	2316487	2316922
chr1	2321139	2321942
chr1	2322430	2323109
chr1	2329683	2329916
chr1	2330085	2330316
chr1	2339890	2340753
chr1	2340996	2341346
chr1	2344229	2344464
chr1	2345198	2345539
chr1	2357137	2357573
chr1	2373702	2374277
chr1	2380933	2381196
chr1	2381293	2381618
chr1	2381772	2382262
chr1	2382347	2382850
chr1	2390945	2392343
chr1	2394969	2395473
chr1	2406572	2406962
chr1	2407457	2407932
chr1	2409283	2409964
chr1	2410232	2410636
chr1	2411619	2412068
chr1	2412172	2413138
chr1	2413526	2414591
chr1	2430284	2430646
chr1	2439133	2439926
chr1	2442333	2442762
chr1	2443066	2443330
chr1	2443369	2443779
chr1	2804191	2805196
chr1	2819615	2820183
chr1	2831884	2832828
chr1	2834454	2834918
chr1	2854135	2854490
chr1	2854898	2855129
chr1	2856006	2856436
chr1	2862828	2863352
chr1	2875724	2876195
chr1	2876705	2877309
chr1	2878137	2878474
chr1	2881362	2881974
chr1	2882334	2882967
chr1	2883021	2883310
chr1	2888322	2888766
chr1	2893256	2893748
chr1	2893792	2894116
chr1	2904190	2904816
chr1	2908685	2909283
chr1	2910313	2910611
chr1	2910661	2910935
chr1	2913570	2914191
chr1	2916173	2916558
chr1	2924365	2924660
chr1	2926464	2926728
chr1	2926779	2927193
chr1	2959286	2959804
chr1	3015286	3015982
chr1	3062945	3063304
chr1	3068157	3068467
chr1	3069039	3069537
chr1	3069564	3070385
chr1	3070549	3071080
chr1	3072646	3072812
chr1	3072997	3073288
chr1	3073721	3074263
chr1	3079147	3079493
chr1	3081468	3081831
chr1	3082242	3082593
chr1	3091298	3091752
chr1	3094059	3094519
chr1	3095661	3095959
chr1	3113094	3113819
chr1	3127328	3127920
chr1	3135508	3136195
chr1	3143925	3144381
chr1	3146465	3146871
chr1	3164839	3165149
chr1	3170088	3170306
chr1	3170545	3170906
chr1	3180489	3180913
chr1	3186302	3186924
chr1	3193443	3193883
chr1	3248477	3248588
chr1	3248695	3248881
chr1	3271989	3272324
chr1	3282920	3283159
chr1	3283929	3284194
chr1	3286506	3286867
chr1	3289562	3290026
chr1	3312055	3312529
chr1	3313223	3313604
chr1	3322866	3323624
chr1	3323732	3324575
chr1	3326693	3327289
chr1	3330647	3331262
chr1	3347235	3347985
chr1	3348578	3349407
chr1	3349416	3349786
chr1	3352285	3352837
chr1	3379978	3380462
chr1	3384115	3384438
chr1	3392919	3394093
chr1	3394133	3394719
chr1	3402554	3403246
chr1	3403349	3403738
chr1	3403792	3404045
chr1	3404489	3404850
chr1	3405488	3406253
chr1	3406948	3407436
chr1	3412426	3413005
chr1	3416513	3416886
chr1	3419614	3420170
chr1	3425377	3426050
chr1	3429383	3429605
chr1	3430467	3430950
chr1	3452057	3452737
chr1	3453188	3453358
chr1	3453405	3453634
chr1	3453891	3454528
chr1	3454655	3455097
chr1	3458056	3458603
chr1	3468092	3468512
chr1	3468626	3469124
chr1	3469284	3469521
chr1	3469851	3470151
chr1	3471657	3472238
chr1	3473222	3473778
chr1	3474510	3474914
chr1	3475761	3475972
chr1	3476266	3476661
chr1	3477904	3478177
chr1	3478395	3478732
chr1	3478807	3479122
chr1	3479877	3480696
chr1	3481607	3482085
chr1	3482321	3482867
chr1	3490192	3490470
chr1	3491687	3492248
chr1	3492407	3492823
chr1	3494180	3494774
chr1	3495502	3495852
chr1	3496417	3497151
chr1	3498738	3499309
chr1	3500191	3500751
chr1	3500959	3501169
chr1	3501703	3501974
chr1	3502030	3502926
chr1	3505657	3506508
chr1	3510604	3510783
chr1	3510844	3511148
chr1	3514919	3515279
chr1	3515807	3516269
chr1	3519052	3519336
chr1	3519382	3519782
chr1	3519961	3520372
chr1	3520889	3521279
chr1	3521724	3522524
chr1	3523366	3523701
chr1	3525475	3525681
chr1	3525977	3526269
chr1	3529045	3529488
chr1	3529720	3530573
chr1	3530858	3531303
chr1	3531337	3532034
chr1	3532269	3532636
chr1	3532988	3533429
chr1	3533749	3534010
chr1	3537386	3538187
chr1	3543339	3543675
chr1	3544314	3544789
chr1	3545689	3546808
chr1	3546916	3547611
chr1	3547695	3548284
chr1	3550890	3551702
chr1	3551773	3552126
chr1	3553206	3553596
chr1	3555686	3556033
chr1	3561930	3562388
chr1	3562629	3563536
chr1	3565360	3566336
chr1	3568865	3569387
chr1	3578611	3579001
chr1	3580779	3581332
chr1	3588524	3589211
chr1	3592968	3593291
chr1	3593439	3593724
chr1	3594496	3595042
chr1	3595796	3596033
chr1	3599494	3599773
chr1	3602267	3602710
chr1	3603599	3604142
chr1	3607155	3608029
chr1	3611072	3611327
chr1	3611615	3612172
chr1	3624098	3624296
chr1	3624560	3625448
chr1	3634027	3634710
chr1	3651778	3653394
chr1	3663952	3664410
chr1	3668761	3669514
chr1	3671761	3672535
chr1	3674586	3675003
chr1	3685002	3685518
chr1	3686885	3687502
chr1	3690742	3691013
chr1	3691410	3691681
chr1	3691746	3692127
chr1	3693034	3693314
chr1	3695696	3695970
chr1	3696624	3696951
chr1	3697249	3697859
chr1	3698044	3698749
chr1	3702047	3702465
chr1	3704394	3705081
chr1	3707082	3707958
chr1	3710244	3710816
chr1	3714090	3714780
chr1	3714974	3715250
chr1	3715538	3715866
chr1	3717762	3718666
chr1	3722427	3723051
chr1	3727130	3727463
chr1	3729242	3729443
chr1	3730019	3730363
chr1	3730585	3731434
chr1	3732770	3733212
chr1	3733984	3734581
chr1	3741547	3742190
chr1	3744642	3745223
chr1	3746691	3747144
chr1	3747185	3747616
chr1	3767568	3768082
chr1	3771348	3771916
chr1	3772060	3773033
chr1	3773075	3773772
chr1	3774129	3774795
chr1	3774981	3775343
chr1	3775676	3775904
chr1	3775987	3776163
chr1	3776889	3777104
chr1	3777232	3777458
chr1	3777496	3778510
chr1	3780849	3781444
chr1	3784975	3785563
chr1	3790363	3790978
chr1	3795773	3795987
chr1	3796108	3796785
chr1	3811264	3811772
chr1	3856572	3857489
chr1	3857586	3858008
chr1	3869293	3869598
chr1	3870001	3870380
chr1	3876647	3877092
chr1	3899592	3901733
chr1	3904556	3904967
chr1	3908798	3909184
chr1	3912485	3913039
chr1	3996910	3997237
chr1	4001903	4002326
chr1	4020431	4020735
chr1	4063133	4063386
chr1	4652527	4652735
chr1	4653269	4653538
chr1	4654119	4654316
chr1	4654427	4654789
chr1	4693705	4694357
chr1	4826346	4826662
chr1	4938900	4939325
chr1	5661851	5662364
chr1	5725566	5726155
chr1	5745606	5746699
chr1	5752619	5752951
chr1	5831323	5831828
chr1	5840190	5840595
chr1	5847369	5847971
chr1	5853181	5853535
chr1	5854130	5854512
chr1	5855019	5855528
chr1	5857743	5858218
chr1	5863316	5863673
chr1	5865480	5865699
chr1	5866009	5866332
chr1	5873137	5873540
chr1	5980548	5980804
chr1	5991113	5991421
chr1	5991604	5992948
chr1	5993354	5993772
chr1	5994221	5994582
chr1	5995933	5997035
chr1	5997186	5997578
chr1	6003904	6004271
chr1	6005487	6005979
chr1	6035252	6035740
chr1	6039018	6039518
chr1	6059628	6060081
chr1	6072380	6073109
chr1	6082782	6083726
chr1	6094990	6095928
chr1	6099043	6099510
chr1	6099754	6100222
chr1	6109619	6110154
chr1	6111639	6112191
chr1	6124900	6125190
chr1	6125622	6125948
chr1	6127543	6128001
chr1	6128063	6128405
chr1	6128551	6128989
chr1	6148528	6149053
chr1	6149203	6149633
chr1	6151358	6152452
chr1	6155117	6155792
chr1	6156692	6156920
chr1	6157189	6157802
chr1	6159443	6159873
chr1	6162448	6163046
chr1	6168316	6168767
chr1	6169715	6170351
chr1	6170570	6171420
chr1	6171613	6172088
chr1	6174800	6175231
chr1	6175398	6175556
chr1	6178990	6179652
chr1	6180145	6180454
chr1	6198971	6199872
chr1	6200149	6200583
chr1	6204968	6205145
chr1	6205238	6205469
chr1	6205778	6206348
chr1	6206529	6206731
chr1	6207315	6208245
chr1	6209036	6209792
chr1	6210124	6210655
chr1	6210907	6211080
chr1	6211281	6211558
chr1	6217964	6218577
chr1	6222713	6223073
chr1	6234596	6234810
chr1	6235647	6236304
chr1	6242383	6242924
chr1	6243579	6244049
chr1	6245053	6246499
chr1	6246542	6247165
chr1	6248350	6249310
chr1	6249369	6250298
chr1	6253800	6254647
chr1	6259733	6260291
chr1	6260387	6261784
chr1	6262006	6262383
chr1	6263049	6263388
chr1	6263636	6264134
chr1	6268643	6269066
chr1	6276940	6277838
chr1	6325748	6325915
chr1	6326113	6326286
chr1	6347849	6348240
chr1	6349428	6350137
chr1	6357110	6357447
chr1	6368332	6368842
chr1	6385544	6386534
chr1	6392595	6392901
chr1	6392989	6393882
chr1	6424034	6424528
chr1	6424781	6425302
chr1	6460755	6461201
chr1	6461544	6461929
chr1	6461968	6462458
chr1	6465911	6466673
chr1	6473145	6473771
chr1	6474798	6475276
chr1	6475563	6475938
chr1	6475994	6476243
chr1	6485067	6485232
chr1	6486550	6486711
chr1	6489161	6490310
chr1	6490409	6491219
chr1	6497180	6497821
chr1	6498010	6498944
chr1	6502097	6502310
chr1	6502436	6503011
chr1	6507255	6507986
chr1	6512372	6512784
chr1	6519885	6520486
chr1	6553995	6554754
chr1	6555041	6555626
chr1	6579702	6580263
chr1	6580556	6581281
chr1	6586172	6586823
chr1	6601896	6602454
chr1	6602546	6603187
chr1	6612617	6614960
chr1	6624774	6625703
chr1	6634230	6634844
chr1	6701248	6702252
chr1	6784112	6784331
chr1	6784375	6785684
chr1	6785770	6786562
chr1	6949814	6950271
chr1	6961325	6961625
chr1	6961641	6963813
chr1	6964016	6964397
chr1	7220685	7221082
chr1	7431466	7431735
chr1	7484112	7484511
chr1	7578060	7578579
chr1	7582972	7583374
chr1	7586455	7586801
chr1	7616931	7617531
chr1	7631659	7632184
chr1	7661691	7662103
chr1	7662610	7662961
chr1	7663711	7664017
chr1	7669410	7670007
chr1	7671082	7671511
chr1	7675813	7676180
chr1	7679108	7679391
chr1	7680246	7680576
chr1	7681435	7681753
chr1	7703122	7703639
chr1	7703848	7704200
chr1	7704301	7705323
chr1	7770985	7771843
chr1	7783389	7783654
chr1	7783766	7784869
chr1	7961228	7962003
chr1	7975150	7975596
chr1	8025686	8026653
chr1	8026772	8027276
chr1	8314236	8315068
chr1	8317698	8318312
chr1	8343000	8343368
chr1	8343608	8344100
chr1	8348839	8349238
chr1	8355294	8356542
chr1	8359336	8359864
chr1	8360649	8361737
chr1	8423180	8423647
chr1	8423724	8424394
chr1	8525795	8526236
chr1	8702905	8703709
chr1	8707002	8707427
chr1	8816831	8817826
chr1	8817876	8818207
chr1	8848785	8849375
chr1	8856875	8857313
chr1	8857543	8857764
chr1	8859190	8859500
chr1	8859565	8859780
chr1	8862350	8862952
chr1	8877857	8878189
chr1	8878268	8879462
chr1	9037771	9038287
chr1	9110843	9111309
chr1	9128474	9128655
chr1	9128704	9129340
chr1	9129394	9129678
chr1	9234395	9235189
chr1	9242959	9243327
chr1	9245045	9245465
chr1	9267089	9267525
chr1	9285405	9286005
chr1	9292883	9293106
chr1	9293312	9293457
chr1	9293573	9293938
chr1	9295128	9295732
chr1	9304989	9305224
chr1	9305271	9305473
chr1	9381795	9382340
chr1	9400052	9400765
chr1	9428732	9429306
chr1	9538748	9539109
chr1	9539184	9539631
chr1	9540174	9540489
chr1	9588316	9589354
chr1	9589587	9589809
chr1	9590018	9590649
chr1	9593474	9593846
chr1	9593981	9594217
chr1	9594659	9594924
chr1	9596691	9597541
chr1	9607266	9607650
chr1	9612055	9612737
chr1	9615422	9616055
chr1	9626837	9627532
chr1	9627691	9628023
chr1	9649424	9649838
chr1	9651774	9652159
chr1	9687433	9688018
chr1	9689050	9689848
chr1	9718491	9719094
chr1	9720809	9721139
chr1	9721958	9722410
chr1	9724556	9724911
chr1	9731407	9731897
chr1	9732645	9732961
chr1	9735683	9736120
chr1	9823184	9823403
chr1	9823628	9824582
chr1	9867257	9867899
chr1	9868653	9869062
chr1	9875082	9875449
chr1	9909181	9910838
chr1	9910942	9911200
chr1	9942785	9943707
chr1	10032358	10033762
chr1	10209754	10211307
chr1	10398413	10399578
chr1	10429882	10430912
chr1	10472084	10472875
chr1	10474792	10475607
chr1	10530351	10530843
chr1	10641118	10641446
chr1	10644039	10644456
chr1	10645972	10647030
chr1	10647561	10647833
chr1	10647874	10648599
chr1	10652949	10653744
chr1	10654182	10654696
chr1	10660140	10660668
chr1	10665114	10665433
chr1	10668288	10668602
chr1	10670542	10670835
chr1	10671370	10672155
chr1	10693875	10694177
chr1	10695209	10695483
chr1	10704355	10705018
chr1	10793910	10794197
chr1	10794800	10795040
chr1	10796457	10796854
chr1	10835893	10836291
chr1	10866811	10867472
chr1	10888809	10889260
chr1	10973828	10974098
chr1	11012219	11013426
chr1	11045220	11045662
chr1	11046572	11047284
chr1	11052618	11053243
chr1	11056355	11056718
chr1	11058947	11059507
chr1	11059531	11060509
chr1	11064063	11064601
chr1	11099239	11100361
chr1	11175957	11176388
chr1	11262219	11263009
chr1	11272712	11274058
chr1	11363756	11364298
chr1	11453902	11454243
chr1	11478668	11479814
chr1	11496342	11496984
chr1	11534930	11535623
chr1	11635778	11636213
chr1	11648550	11649068
chr1	11649641	11649856
chr1	11649913	11650186
chr1	11650425	11650931
chr1	11654230	11654461
chr1	11654719	11655126
chr1	11662381	11662796
chr1	11664040	11664975
chr1	11672479	11672856
chr1	11673118	11673336
chr1	11673435	11674128
chr1	11675247	11675753
chr1	11676586	11677080
chr1	11680345	11680638
chr1	11680884	11681579
chr1	11691423	11691834
chr1	11693224	11693653
chr1	11707185	11707901
chr1	11726682	11727085
chr1	11735957	11736661
chr1	11776352	11776936
chr1	11793832	11794318
chr1	11795109	11795502
chr1	11803383	11803939
chr1	11805325	11806524
chr1	11838530	11838956
chr1	11902568	11903033
chr1	11906086	11906560
chr1	11906661	11907359
chr1	11907770	11908007
chr1	11908252	11909471
chr1	11909510	11909904
chr1	11917819	11918245
chr1	11926200	11926769
chr1	11934268	11935150
chr1	11938606	11938928
chr1	11944317	11944664
chr1	11944676	11945015
chr1	11950169	11950765
chr1	11965438	11965689
chr1	11966047	11966241
chr1	11979335	11980901
chr1	12009323	12009764
chr1	12019123	12020080
chr1	12029139	12030130
chr1	12032037	12032556
chr1	12037249	12038040
chr1	12051991	12052451
chr1	12057202	12057732
chr1	12106955	12107121
chr1	12161726	12162023
chr1	12166711	12167300
chr1	12173531	12174030
chr1	12191355	12191921
chr1	12199355	12200013
chr1	12203799	12204401
chr1	12229679	12230356
chr1	12478112	12478572
chr1	12525766	12526157
chr1	12539846	12540828
chr1	12547607	12547983
chr1	12548836	12549306
chr1	12552341	12552935
chr1	12617994	12618146
chr1	12618233	12618653
chr1	12618720	12619140
chr1	12619187	12619613
chr1	12619845	12620084
chr1	13464642	13465192
chr1	13544010	13544236
chr1	13583611	13583815
chr1	13583855	13584259
chr1	13699969	13700675
chr1	13749055	13750161
chr1	13813689	13814261
chr1	13892630	13893592
chr1	14114808	14115337
chr1	14598337	14599037
chr1	14599176	14599684
chr1	14845244	14845638
chr1	14915572	14915913
chr1	14920369	14920831
chr1	14923477	14923999
chr1	14924204	14924579
chr1	14924615	14924869
chr1	14929519	14929839
chr1	14950272	14950703
chr1	14977362	14977857
chr1	15031408	15031713
chr1	15124515	15125094
chr1	15152528	15152911
chr1	15153340	15154322
chr1	15200634	15200929
chr1	15247068	15247463
chr1	15310362	15310836
chr1	15325540	15325971
chr1	15345259	15345619
chr1	15350258	15350878
chr1	15409365	15410146
chr1	15411128	15411573
chr1	15428591	15429022
chr1	15429151	15429335
chr1	15501502	15501915
chr1	15522633	15522907
chr1	15523955	15525565
chr1	15526353	15527454
chr1	15603333	15603978
chr1	15616774	15617920
chr1	15683918	15684507
chr1	15684738	15685077
chr1	15714897	15715337
chr1	15724705	15725333
chr1	15725546	15726554
chr1	15733617	15734623
chr1	15736117	15736544
chr1	15736758	15737144
chr1	15737638	15738115
chr1	15738401	15738753
chr1	15738912	15739408
chr1	15741139	15741869
chr1	15744128	15744663
chr1	15758715	15759319
chr1	15762487	15762925
chr1	15800091	15800507
chr1	15800568	15800713
chr1	15834344	15836420
chr1	15836733	15837143
chr1	15847322	15848324
chr1	15848369	15848846
chr1	15849418	15850348
chr1	15876165	15876680
chr1	15886093	15886706
chr1	15935487	15935714
chr1	15935800	15935991
chr1	15936077	15936682
chr1	15937151	15937413
chr1	15937543	15938265
chr1	15941223	15941760
chr1	15942018	15942698
chr1	15943285	15943942
chr1	15945910	15946516
chr1	15946923	15947466
chr1	15975321	15976296
chr1	16028389	16028820
chr1	16030277	16030591
chr1	16064412	16064764
chr1	16064845	16065269
chr1	16068352	16068720
chr1	16072932	16073202
chr1	16073505	16073795
chr1	16145017	16145345
chr1	16146275	16146680
chr1	16148307	16148626
chr1	16151641	16152072
chr1	16154780	16155585
chr1	16155765	16156514
chr1	16162193	16162720
chr1	16167659	16168122
chr1	16173009	16173247
chr1	16173985	16174554
chr1	16177030	16177644
chr1	16187679	16188220
chr1	16206131	16206468
chr1	16206590	16207330
chr1	16212385	16212775
chr1	16215722	16216173
chr1	16216277	16216676
chr1	16216962	16217945
chr1	16218019	16218215
chr1	16231797	16232427
chr1	16236539	16237589
chr1	16242482	16243092
chr1	16244321	16244636
chr1	16352008	16352904
chr1	16366943	16368026
chr1	16440120	16441106
chr1	16498785	16499759
chr1	16613256	16613995
chr1	16621065	16621370
chr1	16727274	16727669
chr1	16897233	16897613
chr1	16904523	16905264
chr1	16905398	16905972
chr1	16913516	16914672
chr1	16922213	16922995
chr1	16923211	16923584
chr1	16924478	16925275
chr1	16925537	16926127
chr1	16926186	16926574
chr1	16954505	16955004
chr1	16960903	16961175
chr1	16963332	16963729
chr1	16970072	16971307
chr1	16971901	16972202
chr1	16977852	16978322
chr1	16978726	16979117
chr1	16979201	16979873
chr1	16980389	16981167
chr1	16986573	16986944
chr1	16987002	16987390
chr1	16989697	16990740
chr1	16991671	16991977
chr1	16992067	16992717
chr1	17011426	17012320
chr1	17012681	17013001
chr1	17053706	17054436
chr1	17119146	17119618
chr1	17405952	17406502
chr1	17433570	17434310
chr1	17437671	17438983
chr1	17439092	17439445
chr1	17439647	17440078
chr1	17539639	17540190
chr1	17573600	17574262
chr1	17579824	17580047
chr1	17606669	17607118
chr1	17610435	17610975
chr1	17642271	17642824
chr1	17664133	17664514
chr1	17666426	17666803
chr1	17675129	17675962
chr1	17744659	17745023
chr1	17887189	17887465
chr1	18109967	18110633
chr1	18563756	18564100
chr1	18819728	18820232
chr1	18868190	18868519
chr1	18902164	18903235
chr1	18912995	18913561
chr1	18922150	18922502
chr1	18949450	18949975
chr1	18955465	18955877
chr1	18957320	18957491
chr1	19053699	19054175
chr1	19057793	19058085
chr1	19064624	19065092
chr1	19066815	19067299
chr1	19068526	19069126
chr1	19209778	19210862
chr1	19251265	19252460
chr1	19308292	19308695
chr1	19311785	19312469
chr1	19312672	19312898
chr1	19328373	19328987
chr1	19338433	19338723
chr1	19344396	19344648
chr1	19344748	19344984
chr1	19484282	19484926
chr1	19485279	19486100
chr1	19596611	19597307
chr1	19640380	19641027
chr1	19643828	19644489
chr1	19653671	19654059
chr1	19659698	19660251
chr1	19665222	19666268
chr1	19695539	19695935
chr1	19715635	19716090
chr1	19799638	19800321
chr1	19882074	19882620
chr1	20141351	20141834
chr1	20152220	20152855
chr1	20213033	20213312
chr1	20292256	20292736
chr1	20367051	20367672
chr1	20430275	20430893
chr1	20507875	20508428
chr1	20553521	20554024
chr1	20633310	20633675
chr1	20633736	20633999
chr1	20648403	20648765
chr1	20660926	20662341
chr1	20696213	20697370
chr1	20699601	20700098
chr1	20715484	20715787
chr1	20717207	20717564
chr1	20717870	20718131
chr1	20722231	20722733
chr1	20723991	20724179
chr1	20724394	20724760
chr1	20725315	20725595
chr1	20725884	20726415
chr1	20726769	20727199
chr1	20727271	20727692
chr1	20730456	20730902
chr1	20732200	20732626
chr1	20786097	20787734
chr1	21176470	21177330
chr1	21217827	21218389
chr1	21270305	21270702
chr1	21334534	21335265
chr1	21344508	21344975
chr1	21345191	21346185
chr1	21490761	21491416
chr1	21508956	21509667
chr1	21562768	21562981
chr1	21563020	21563219
chr1	21594428	21595028
chr1	21597482	21597795
chr1	21599330	21599915
chr1	21605993	21606761
chr1	21607423	21608560
chr1	21611102	21611548
chr1	21614466	21614887
chr1	21620618	21621045
chr1	21622075	21622840
chr1	21635005	21635182
chr1	21635463	21635600
chr1	21647860	21648178
chr1	21648248	21648386
chr1	21649521	21650019
chr1	21651440	21651822
chr1	21652147	21652480
chr1	21652889	21653835
chr1	21657144	21657517
chr1	21659176	21659681
chr1	21662807	21663470
chr1	21663627	21664466
chr1	21665756	21666269
chr1	21668841	21669581
chr1	21671989	21672415
chr1	21782506	21783409
chr1	21783547	21783831
chr1	21829401	21830212
chr1	21843863	21844691
chr1	21859816	21859977
chr1	21860129	21860350
chr1	21904282	21905274
chr1	21936118	21936593
chr1	21936640	21937307
chr1	21937356	21938063
chr1	21951038	21951542
chr1	22024736	22025698
chr1	22025783	22026332
chr1	22052303	22053061
chr1	22053127	22053490
chr1	22120087	22120449
chr1	22120996	22121344
chr1	22131636	22132322
chr1	22137236	22137576
chr1	22139695	22139987
chr1	22142342	22143116
chr1	22143162	22143947
chr1	22157330	22157919
chr1	22451687	22452412
chr1	22556442	22556980
chr1	22563103	22563897
chr1	22596852	22597293
chr1	22600727	22601012
chr1	22601128	22601484
chr1	22642120	22642285
chr1	22642421	22642661
chr1	22643919	22644275
chr1	22676944	22677366
chr1	22710302	22711401
chr1	22780705	22781217
chr1	22810062	22810448
chr1	22817560	22817978
chr1	22870248	22870752
chr1	23019161	23019776
chr1	23098513	23098848
chr1	23167385	23167994
chr1	23168068	23168335
chr1	23168405	23169107
chr1	23177533	23178062
chr1	23216905	23217361
chr1	23343536	23345075
chr1	23368023	23369374
chr1	23403783	23404131
chr1	23452214	23452850
chr1	23483880	23485009
chr1	23521266	23522040
chr1	23524225	23524691
chr1	23528068	23528485
chr1	23530610	23530797
chr1	23530932	23531101
chr1	23531357	23531726
chr1	23539769	23540131
chr1	23553930	23554245
chr1	23554634	23555282
chr1	23556711	23557187
chr1	23558070	23558931
chr1	23559096	23559758
chr1	23562311	23562798
chr1	23691538	23692264
chr1	23742988	23744182
chr1	23778356	23778749
chr1	23790745	23791332
chr1	23795734	23796460
chr1	23800327	23801267
chr1	23809807	23810130
chr1	23810576	23811154
chr1	23825211	23825714
chr1	23867650	23867812
chr1	23867894	23868588
chr1	23916931	23917473
chr1	23959001	23960347
chr1	23979806	23981055
chr1	24009544	24009792
chr1	24018664	24019214
chr1	24089471	24089815
chr1	24321697	24322010
chr1	24322107	24322701
chr1	24413383	24413793
chr1	24415348	24416002
chr1	24502622	24503195
chr1	24642588	24642764
chr1	24642845	24643463
chr1	24705357	24705680
chr1	24724646	24725012
chr1	24744742	24746211
chr1	24848024	24848757
chr1	24909578	24909767
chr1	24930081	24930773
chr1	24932347	24932557
chr1	24937805	24938329
chr1	24995628	24996183
chr1	25016775	25017497
chr1	25232087	25232345
chr1	25232420	25232797
chr1	25239538	25240227
chr1	25246194	25246729
chr1	25247159	25248048
chr1	25338211	25338946
chr1	25429902	25430477
chr1	25430682	25431772
chr1	25543391	25543973
chr1	25563566	25563921
chr1	25572817	25573039
chr1	25615995	25617035
chr1	25619136	25619447
chr1	25746417	25746753
chr1	25783595	25783996
chr1	25799865	25800129
chr1	25800157	25800457
chr1	25800517	25801219
chr1	25809551	25810204
chr1	25813241	25813631
chr1	25819587	25820471
chr1	25820558	25821062
chr1	25827049	25827933
chr1	25859183	25859827
chr1	25862100	25862752
chr1	25875293	25876114
chr1	25895454	25895651
chr1	25905379	25906624
chr1	25906815	25906978
chr1	25997727	25998389
chr1	26028359	26028819
chr1	26035165	26035763
chr1	26035928	26036178
chr1	26045311	26045848
chr1	26110885	26111233
chr1	26111331	26112483
chr1	26161843	26162310
chr1	26164192	26164700
chr1	26168330	26168701
chr1	26169558	26170281
chr1	26190526	26190859
chr1	26233820	26234839
chr1	26279622	26280151
chr1	26280287	26280553
chr1	26285352	26286063
chr1	26306059	26306836
chr1	26336252	26336852
chr1	26343810	26344354
chr1	26431953	26432620
chr1	26471555	26471947
chr1	26472047	26473274
chr1	26500104	26500474
chr1	26500550	26501478
chr1	26529610	26530260
chr1	26554272	26554623
chr1	26554657	26554960
chr1	26620237	26620670
chr1	26621260	26621594
chr1	26692186	26692695
chr1	26692874	26693390
chr1	26695336	26696519
chr1	26696904	26697173
chr1	26697222	26697689
chr1	26697892	26698424
chr1	26787560	26788512
chr1	26826376	26826956
chr1	26828538	26829328
chr1	26848412	26848970
chr1	26849493	26850329
chr1	26856394	26856849
chr1	26863659	26864160
chr1	26864486	26865723
chr1	26889790	26890530
chr1	26899894	26900663
chr1	26914083	26914379
chr1	26921447	26922095
chr1	26993273	26995035
chr1	27005811	27006208
chr1	27012398	27013401
chr1	27100798	27101099
chr1	27107294	27107686
chr1	27154779	27155383
chr1	27234072	27234851
chr1	27234898	27235141
chr1	27321804	27322601
chr1	27335852	27336302
chr1	27356493	27357139
chr1	27357362	27358497
chr1	27363572	27364274
chr1	27365017	27365423
chr1	27365458	27365759
chr1	27366826	27367114
chr1	27382838	27383527
chr1	27391823	27393232
chr1	27393411	27393987
chr1	27394287	27394684
chr1	27489502	27490706
chr1	27519339	27519957
chr1	27522264	27522718
chr1	27525388	27526002
chr1	27527125	27527680
chr1	27527766	27528409
chr1	27549772	27550145
chr1	27568179	27568985
chr1	27574998	27576317
chr1	27594032	27594617
chr1	27596573	27597424
chr1	27603200	27603706
chr1	27603746	27604482
chr1	27659841	27660242
chr1	27672144	27672787
chr1	27725325	27726597
chr1	27772801	27773946
chr1	27830609	27831315
chr1	27872438	27872798
chr1	27873310	27873583
chr1	27914158	27915101
chr1	27959516	27960436
chr1	28088175	28089048
chr1	28232708	28232858
chr1	28232943	28233134
chr1	28235780	28236411
chr1	28246942	28247517
chr1	28259217	28259748
chr1	28259787	28259988
chr1	28296795	28297154
chr1	28328635	28329255
chr1	28369483	28370513
chr1	28437861	28438176
chr1	28505533	28506174
chr1	28506224	28506495
chr1	28507623	28508101
chr1	28509746	28510341
chr1	28510455	28510838
chr1	28517662	28518920
chr1	28552647	28553361
chr1	28581080	28581486
chr1	28582203	28582424
chr1	28642594	28643320
chr1	28648169	28648413
chr1	28648544	28649471
chr1	28668475	28668886
chr1	28736317	28737078
chr1	28737276	28737556
chr1	28881958	28882439
chr1	28884981	28885493
chr1	28886777	28887117
chr1	28887723	28887873
chr1	28914102	28915300
chr1	29122259	29122910
chr1	29124361	29125292
chr1	29181353	29182439
chr1	29230636	29231292
chr1	29235925	29236270
chr1	29236316	29237071
chr1	29238240	29238602
chr1	29258306	29258736
chr1	29282653	29283770
chr1	29283924	29284274
chr1	29362977	29363501
chr1	29449822	29450303
chr1	29697898	29698892
chr1	29706968	29707292
chr1	30325442	30325746
chr1	30714357	30714646
chr1	30717167	30720002
chr1	30721379	30721767
chr1	30722387	30722902
chr1	30722953	30723506
chr1	30782134	30782730
chr1	30801356	30801707
chr1	30824320	30824769
chr1	30824856	30825122
chr1	30825237	30825752
chr1	30876554	30877033
chr1	30907337	30907951
chr1	30908919	30909678
chr1	30911233	30911798
chr1	30918775	30919228
chr1	30929209	30929658
chr1	30930520	30931013
chr1	30933217	30933816
chr1	30997670	30997992
chr1	31065181	31066296
chr1	31154609	31155004
chr1	31155329	31155722
chr1	31170830	31171254
chr1	31181542	31181854
chr1	31218629	31218974
chr1	31239218	31239544
chr1	31239622	31240154
chr1	31296652	31297597
chr1	31373546	31373864
chr1	31394748	31394999
chr1	31412878	31413242
chr1	31413720	31414083
chr1	31422525	31422954
chr1	31434865	31435365
chr1	31435551	31435909
chr1	31593934	31594417
chr1	31617647	31617953
chr1	31617998	31618630
chr1	31632702	31633553
chr1	31644568	31645566
chr1	31684071	31684809
chr1	31701995	31702554
chr1	31705076	31705645
chr1	31714464	31714980
chr1	31715034	31715906
chr1	31726735	31727532
chr1	31732140	31732771
chr1	31745554	31746174
chr1	31753385	31753692
chr1	31754659	31754995
chr1	31759361	31760228
chr1	31760858	31761245
chr1	31762277	31763243
chr1	31764229	31764782
chr1	31788227	31788763
chr1	31788831	31789148
chr1	31789293	31789941
chr1	31814247	31814702
chr1	31815581	31816161
chr1	31937295	31938916
chr1	31939734	31940308
chr1	31944335	31945135
chr1	31977808	31978124
chr1	32008981	32009520
chr1	32013414	32014574
chr1	32014847	32015082
chr1	32062504	32062922
chr1	32063028	32063363
chr1	32072371	32073558
chr1	32107910	32108680
chr1	32179296	32180190
chr1	32180378	32181029
chr1	32194580	32195305
chr1	32199889	32200792
chr1	32201213	32201889
chr1	32205161	32205772
chr1	32205839	32206354
chr1	32222151	32222771
chr1	32274778	32275124
chr1	32291766	32292517
chr1	32332224	32332514
chr1	32332899	32333094
chr1	32334994	32335691
chr1	32335713	32336318
chr1	32336408	32336946
chr1	32346076	32346513
chr1	32346587	32347163
chr1	32348364	32349048
chr1	32351059	32352064
chr1	32360976	32361158
chr1	32361334	32361521
chr1	32361902	32362628
chr1	32393951	32394271
chr1	32394312	32394953
chr1	32464665	32465313
chr1	32500357	32501150
chr1	32612183	32612542
chr1	32650425	32650719
chr1	32650758	32651837
chr1	32702886	32703428
chr1	32712006	32712671
chr1	32737503	32737947
chr1	32741418	32741847
chr1	32741896	32742118
chr1	32742247	32742619
chr1	32753641	32755108
chr1	32759991	32760525
chr1	32769938	32770418
chr1	32770476	32770692
chr1	32773037	32773470
chr1	32816858	32817021
chr1	32817112	32818437
chr1	32869835	32870300
chr1	32870332	32870943
chr1	32886276	32886836
chr1	32886906	32887354
chr1	32892402	32892714
chr1	32892915	32893453
chr1	32894860	32895117
chr1	32895240	32895464
chr1	32896398	32896996
chr1	32898882	32899337
chr1	32900606	32901051
chr1	32963742	32965088
chr1	32972808	32973557
chr1	32991666	32992230
chr1	32992363	32992948
chr1	33036229	33036648
chr1	33036815	33037191
chr1	33080936	33081558
chr1	33081993	33082484
chr1	33086268	33086817
chr1	33120507	33121044
chr1	33127183	33127628
chr1	33151275	33151653
chr1	33175402	33175826
chr1	33180643	33181101
chr1	33181136	33181600
chr1	33181669	33182239
chr1	33182423	33182916
chr1	33255674	33257062
chr1	33272053	33272583
chr1	33275275	33275550
chr1	33275615	33276018
chr1	33298572	33298893
chr1	33349110	33350502
chr1	33430200	33431576
chr1	33472322	33473145
chr1	33519727	33520215
chr1	34127710	34128398
chr1	34163189	34163601
chr1	34163857	34164531
chr1	34164722	34165170
chr1	34827974	34828315
chr1	34844121	34844628
chr1	34852729	34853121
chr1	34858929	34859929
chr1	34865475	34866080
chr1	34866112	34866963
chr1	34867854	34868380
chr1	34928975	34929378
chr1	34929940	34930356
chr1	34984934	34985454
chr1	35031483	35032112
chr1	35079112	35079711
chr1	35120269	35120645
chr1	35120745	35120921
chr1	35122269	35122719
chr1	35191848	35192587
chr1	35192836	35193513
chr1	35268366	35268717
chr1	35268791	35269280
chr1	35432176	35433058
chr1	35436952	35437514
chr1	35556893	35558184
chr1	35558284	35558585
chr1	35558723	35558914
chr1	35563561	35563875
chr1	35573298	35573704
chr1	35587778	35588832
chr1	35590406	35590707
chr1	35591251	35591666
chr1	35593207	35593616
chr1	35640860	35641866
chr1	35707662	35707920
chr1	35708199	35708445
chr1	35715612	35716072
chr1	35718255	35719023
chr1	35769052	35770403
chr1	35807508	35808290
chr1	35808456	35809273
chr1	35882623	35883619
chr1	35883686	35884155
chr1	35930627	35931737
chr1	36084726	36085438
chr1	36087439	36088279
chr1	36088358	36089359
chr1	36089482	36090013
chr1	36106736	36107067
chr1	36107368	36107754
chr1	36125149	36125482
chr1	36127663	36128126
chr1	36148774	36149956
chr1	36150626	36150842
chr1	36150877	36151245
chr1	36151580	36151954
chr1	36155780	36156360
chr1	36156675	36157221
chr1	36160924	36161529
chr1	36175813	36176597
chr1	36178345	36178858
chr1	36187771	36188591
chr1	36203262	36203407
chr1	36203489	36203765
chr1	36223696	36225014
chr1	36305803	36306016
chr1	36306226	36307197
chr1	36307597	36307920
chr1	36307973	36308198
chr1	36319271	36319961
chr1	36320877	36321759
chr1	36322617	36322779
chr1	36323291	36323828
chr1	36327680	36328064
chr1	36340803	36341160
chr1	36343041	36343484
chr1	36343831	36344088
chr1	36369131	36369956
chr1	36373915	36374057
chr1	36374535	36374980
chr1	36385363	36387121
chr1	36397263	36397540
chr1	36397620	36398118
chr1	36420846	36421430
chr1	36450221	36450740
chr1	36464106	36465017
chr1	36705623	36706163
chr1	36859043	36859511
chr1	36880501	36881109
chr1	36961173	36961747
chr1	36989039	36989477
chr1	37033372	37033638
chr1	37034112	37034504
chr1	37244164	37244688
chr1	37471339	37471657
chr1	37474119	37474711
chr1	37474843	37476172
chr1	37479996	37480507
chr1	37481302	37481683
chr1	37483092	37483468
chr1	37514094	37515226
chr1	37554078	37554470
chr1	37561274	37561896
chr1	37595675	37596273
chr1	37690139	37691033
chr1	37691499	37693092
chr1	37717985	37718803
chr1	37752606	37753690
chr1	37793314	37793734
chr1	37793836	37794339
chr1	37794623	37795006
chr1	37799275	37799700
chr1	37807569	37808756
chr1	37808933	37809385
chr1	37859232	37860553
chr1	37931333	37932145
chr1	37946999	37947552
chr1	37989326	37989626
chr1	37989766	37990673
chr1	38003810	38004487
chr1	38005260	38005694
chr1	38012324	38013102
chr1	38033482	38034317
chr1	38034435	38035223
chr1	38045343	38045704
chr1	38045905	38046274
chr1	38047722	38047927
chr1	38140000	38140389
chr1	38608310	38608782
chr1	38817957	38818660
chr1	38858912	38860228
chr1	38872904	38873786
chr1	38990846	38991665
chr1	39026160	39026527
chr1	39081370	39081869
chr1	39104811	39106190
chr1	39170796	39171061
chr1	39408582	39409387
chr1	39409492	39409753
chr1	39491333	39492069
chr1	39559364	39559848
chr1	39570642	39571329
chr1	39575208	39575643
chr1	39575706	39576181
chr1	39576394	39577379
chr1	39609684	39610031
chr1	39639297	39639628
chr1	39639674	39640068
chr1	39641573	39641928
chr1	39690825	39691227
chr1	39691328	39691997
chr1	39738559	39739111
chr1	39788373	39789006
chr1	39789147	39789378
chr1	39883143	39883380
chr1	39883447	39883692
chr1	39901193	39901452
chr1	39901564	39902105
chr1	39902222	39902601
chr1	39954660	39955478
chr1	40040017	40040320
chr1	40040366	40040959
chr1	40097153	40097491
chr1	40161067	40161618
chr1	40161721	40161901
chr1	40257396	40258681
chr1	40373492	40374049
chr1	40374094	40374709
chr1	40449739	40450462
chr1	40477057	40477401
chr1	40477467	40477932
chr1	40508439	40508968
chr1	40508987	40509281
chr1	40531468	40532027
chr1	40665280	40666044
chr1	40691277	40692483
chr1	40709122	40709399
chr1	40781258	40781651
chr1	40783349	40784360
chr1	40802953	40803391
chr1	40838369	40839209
chr1	40849501	40850257
chr1	40861671	40861903
chr1	40862090	40862650
chr1	40863538	40863735
chr1	40881221	40881886
chr1	40979003	40980490
chr1	41003748	41004089
chr1	41015249	41015581
chr1	41015847	41016458
chr1	41016950	41017353
chr1	41017912	41018188
chr1	41018298	41018588
chr1	41020244	41020904
chr1	41021364	41022572
chr1	41023375	41023833
chr1	41024426	41024673
chr1	41024985	41025206
chr1	41027239	41027560
chr1	41241285	41242154
chr1	41242554	41242836
chr1	41360672	41362143
chr1	41362702	41363493
chr1	41365361	41365746
chr1	41374234	41374624
chr1	41381089	41381449
chr1	41381571	41381950
chr1	41382187	41382463
chr1	41432414	41433199
chr1	41446930	41447163
chr1	41494667	41495519
chr1	41495740	41496094
chr1	41496135	41497000
chr1	41513390	41513840
chr1	41516201	41516407
chr1	41516448	41516775
chr1	41661719	41662808
chr1	41711682	41712217
chr1	41920115	41920436
chr1	42035239	42036294
chr1	42164813	42165418
chr1	42168250	42168818
chr1	42169609	42170126
chr1	42334290	42335652
chr1	42380273	42381141
chr1	42456292	42457089
chr1	42462918	42463367
chr1	42658028	42659295
chr1	42681998	42682558
chr1	42682583	42683429
chr1	42684157	42684543
chr1	42739248	42739521
chr1	42739658	42739898
chr1	42740169	42740486
chr1	42746784	42747473
chr1	42756823	42757258
chr1	42766301	42767677
chr1	42816577	42816762
chr1	42816877	42817549
chr1	42846307	42846864
chr1	42924086	42924962
chr1	42957908	42959284
chr1	43071214	43071699
chr1	43147596	43148067
chr1	43171966	43172788
chr1	43206710	43207215
chr1	43348817	43349290
chr1	43358300	43359222
chr1	43366805	43367577
chr1	43367729	43368637
chr1	43389484	43390269
chr1	43422832	43423595
chr1	43448176	43448645
chr1	43453671	43453881
chr1	43453920	43454059
chr1	43530734	43531345
chr1	43531480	43531839
chr1	43559911	43560607
chr1	43583880	43584354
chr1	43591032	43591873
chr1	43592838	43593379
chr1	43602320	43603040
chr1	43604060	43604511
chr1	43604659	43605333
chr1	43649416	43650793
chr1	43706683	43706894
chr1	43707224	43708052
chr1	43934338	43934570
chr1	43934856	43935209
chr1	43935953	43937116
chr1	43939662	43940180
chr1	43946279	43947316
chr1	43969695	43970510
chr1	43974335	43975424
chr1	43978550	43978866
chr1	43979048	43979385
chr1	43979665	43980153
chr1	43983734	43984574
chr1	43991442	43991985
chr1	43992029	43992296
chr1	43994695	43995172
chr1	44002213	44002821
chr1	44008248	44008562
chr1	44029682	44031185
chr1	44031858	44032139
chr1	44213317	44213986
chr1	44238030	44238462
chr1	44238519	44238747
chr1	44354882	44355461
chr1	44404901	44405665
chr1	44417289	44417896
chr1	44418194	44418320
chr1	44484269	44484552
chr1	44602335	44602772
chr1	44604554	44604967
chr1	44631337	44632593
chr1	44652398	44652676
chr1	44652738	44653219
chr1	44673829	44675144
chr1	44720290	44720481
chr1	44722088	44722299
chr1	44723674	44724349
chr1	44724850	44725148
chr1	44729064	44729541
chr1	44730106	44731234
chr1	44731316	44731502
chr1	44739428	44740480
chr1	44762557	44762893
chr1	44766705	44767364
chr1	44775290	44775831
chr1	44776198	44776697
chr1	44781401	44781788
chr1	44782912	44783501
chr1	44785972	44787107
chr1	44787983	44788776
chr1	44793541	44793994
chr1	44799698	44800758
chr1	44800788	44801202
chr1	44801988	44802690
chr1	44803634	44804125
chr1	44806018	44806603
chr1	44807376	44807716
chr1	44808428	44808677
chr1	44808954	44809159
chr1	44811815	44812274
chr1	44813083	44813773
chr1	44819237	44820559
chr1	44820596	44820762
chr1	44823199	44823635
chr1	44826281	44827065
chr1	44827160	44828029
chr1	44842949	44843842
chr1	44986187	44987082
chr1	45012028	45012330
chr1	45205643	45205897
chr1	45206158	45206725
chr1	45303405	45304370
chr1	45326851	45327516
chr1	45331679	45331994
chr1	45339657	45340769
chr1	45341167	45341577
chr1	45490920	45491631
chr1	45499551	45500612
chr1	45508702	45509339
chr1	45521128	45521455
chr1	45521635	45522239
chr1	45550597	45551246
chr1	45569951	45570477
chr1	45583223	45584257
chr1	45584397	45585208
chr1	45590152	45590541
chr1	45621310	45621673
chr1	45685915	45687603
chr1	45687847	45688635
chr1	45750268	45751158
chr1	45803313	45803720
chr1	46030579	46031346
chr1	46035367	46035717
chr1	46037678	46037894
chr1	46132303	46133558
chr1	46171613	46172171
chr1	46181811	46182166
chr1	46198167	46199085
chr1	46203108	46203437
chr1	46203493	46203975
chr1	46246791	46248041
chr1	46248211	46248633
chr1	46263307	46263736
chr1	46285561	46285741
chr1	46285960	46286158
chr1	46300480	46300885
[truncated: 40,489 more rows]

## Sheet: Supplementary Table 1d
Chr	Start	End
chr1	923341	924230
chr1	924350	925284
chr1	935562	936146
chr1	936190	936844
chr1	938004	938841
chr1	939065	939747
chr1	940719	941400
chr1	941568	942144
chr1	942187	942936
chr1	960389	961711
chr1	996568	997400
chr1	997506	998136
chr1	998239	999463
chr1	999867	1001419
chr1	1019241	1019793
chr1	1019862	1020526
chr1	1039909	1040813
chr1	1079318	1080483
chr1	1082241	1082937
chr1	1115785	1116579
chr1	1125089	1126223
chr1	1203141	1204182
chr1	1231555	1232764
chr1	1245756	1247086
chr1	1273556	1274953
chr1	1292832	1294153
chr1	1305723	1306764
chr1	1306878	1308098
chr1	1309965	1310954
chr1	1312157	1313026
chr1	1320353	1321330
chr1	1324215	1325393
chr1	1332374	1333109
chr1	1335746	1336742
chr1	1337192	1337991
chr1	1342752	1343667
chr1	1344729	1345488
chr1	1345495	1346171
chr1	1348783	1350046
chr1	1370439	1371336
chr1	1371477	1372809
chr1	1375046	1375768
chr1	1398720	1400025
chr1	1435112	1435998
chr1	1440682	1441607
chr1	1511485	1512361
chr1	1538084	1538844
chr1	1539155	1539873
chr1	1574587	1575338
chr1	1600827	1601577
chr1	1615006	1616578
chr1	1627100	1627754
chr1	1724014	1724834
chr1	1752838	1753856
chr1	1777870	1778835
chr1	1890664	1891498
chr1	1908153	1909434
chr1	1919139	1920174
chr1	1925471	1926074
chr1	1926372	1927094
chr1	2049226	2049987
chr1	2050038	2051549
chr1	2133070	2133882
chr1	2204354	2205603
chr1	2211954	2213117
chr1	2226880	2228377
chr1	2229713	2230355
chr1	2239896	2240825
chr1	2272323	2273612
chr1	2310819	2311457
chr1	2312015	2312695
chr1	2314736	2315653
chr1	2320575	2321626
chr1	2391271	2392127
chr1	2412144	2413013
chr1	2413563	2414297
chr1	3067476	3068275
chr1	3393511	3394579
chr1	3402945	3404111
chr1	3530741	3531724
chr1	3623762	3625188
chr1	3671191	3672330
chr1	3727442	3728589
chr1	3772795	3774188
chr1	3777768	3778718
chr1	3899076	3900178
chr1	3900253	3901890
chr1	3911412	3912496
chr1	5660484	5661974
chr1	5991826	5992740
chr1	6111654	6112820
chr1	6170062	6171178
chr1	6235183	6236403
chr1	6245748	6246553
chr1	6385862	6387217
chr1	6392968	6393936
chr1	6602335	6603635
chr1	6613245	6613812
chr1	6614028	6614682
chr1	6784890	6786235
chr1	6962225	6962870
chr1	6963090	6963683
chr1	7704038	7705101
chr1	7783613	7784917
chr1	7961255	7961984
chr1	8025993	8026752
chr1	8423633	8424339
chr1	8702938	8703844
chr1	8878516	8879518
chr1	9129249	9130043
chr1	9234191	9235430
chr1	9292871	9294150
chr1	9588167	9589146
chr1	9730756	9731893
chr1	9909489	9910864
chr1	10032360	10033159
chr1	10033195	10033897
chr1	10209601	10210212
chr1	10210755	10211489
chr1	10398367	10399578
chr1	11059327	11059981
chr1	11648284	11649218
chr1	11805229	11806445
chr1	11908297	11909404
chr1	11979873	11980659
chr1	12019237	12020288
chr1	13748936	13749695
chr1	15523825	15525141
chr1	15616712	15618021
chr1	15834740	15836353
chr1	15847288	15848161
chr1	16366772	16367436
chr1	16498882	16499758
chr1	16613210	16614372
chr1	17011144	17012240
chr1	19209925	19210698
chr1	19484938	19485526
chr1	19485610	19486214
chr1	20633277	20634182
chr1	20660989	20662100
chr1	21176438	21177524
chr1	21334382	21335826
chr1	21599006	21599881
chr1	22052134	22052991
chr1	22142248	22142856
chr1	22142978	22143601
chr1	22563616	22564306
chr1	23019084	23020140
chr1	23216696	23217817
chr1	23367800	23368461
chr1	23368710	23369427
chr1	23483824	23484910
chr1	23530731	23531824
chr1	23556259	23557338
chr1	23557520	23558809
chr1	23800504	23801158
chr1	23979918	23980750
chr1	24502088	24502941
chr1	24642871	24643619
chr1	24848075	24849024
chr1	24930520	24931426
chr1	25239432	25240311
chr1	25338218	25339053
chr1	25819726	25820451
chr1	25906292	25907283
chr1	26111223	26111907
chr1	26111962	26112708
chr1	26233556	26234765
chr1	26471371	26471944
chr1	26472403	26473324
chr1	26500103	26501270
chr1	26695169	26696103
chr1	26697672	26698583
chr1	26787499	26788293
chr1	26864860	26865678
chr1	27321874	27322459
chr1	27365465	27366869
chr1	27489647	27490772
chr1	27725375	27726617
chr1	27773076	27774589
chr1	28088311	28089205
chr1	28505354	28506108
chr1	28668517	28669353
chr1	28736134	28737125
chr1	28881962	28882852
chr1	29180991	29181582
chr1	29181735	29182412
chr1	29282894	29284001
chr1	30718576	30719894
chr1	31296361	31297363
chr1	31413033	31413760
chr1	31413810	31414408
chr1	31813794	31814691
chr1	31815607	31816400
chr1	32013151	32014016
chr1	32014119	32014763
chr1	32179380	32180148
chr1	32351054	32352141
chr1	32650688	32651691
chr1	32741435	32742318
chr1	32753435	32754192
chr1	32817181	32817776
chr1	32817785	32818485
chr1	32885781	32886391
chr1	32886459	32886977
chr1	33150413	33151556
chr1	33255443	33256239
chr1	33256347	33257329
chr1	33472169	33472874
chr1	35031486	35032220
chr1	35191859	35192684
chr1	35556986	35557994
chr1	35769053	35770308
chr1	35882619	35883885
chr1	36088286	36089313
chr1	36125034	36125842
chr1	36149159	36149960
chr1	36155722	36156272
chr1	36156429	36157255
chr1	36223924	36224835
chr1	37690039	37691034
chr1	37691990	37692827
chr1	37793650	37794660
chr1	37931066	37932366
chr1	38012236	38013263
chr1	38045752	38047242
chr1	38047643	38048288
chr1	38607994	38608792
chr1	38859398	38860351
chr1	38991185	38992035
chr1	39104992	39105931
chr1	39408113	39409457
chr1	39491366	39492136
chr1	39900719	39901928
chr1	40373379	40374819
chr1	40449765	40450826
chr1	40979072	40980333
chr1	41019871	41020744
chr1	41360795	41361649
chr1	41382017	41383167
chr1	42035313	42036311
chr1	42380021	42380573
chr1	42380736	42381366
chr1	42958273	42959408
chr1	43367580	43368675
chr1	43649654	43650521
chr1	43706758	43708190
chr1	43946147	43947429
chr1	43969557	43970444
chr1	43974715	43975703
chr1	43978355	43979099
chr1	44631254	44632572
chr1	44673848	44674879
chr1	44721371	44722108
chr1	44730485	44731327
chr1	44787434	44788468
chr1	44819443	44820679
chr1	44842604	44843286
chr1	45303238	45304332
chr1	45331963	45333053
chr1	45490718	45491727
chr1	45550452	45551348
chr1	45803169	45803822
chr1	46031029	46032244
chr1	46132283	46132949
chr1	46197952	46198719
chr1	46246890	46247945
chr1	46301523	46302129
chr1	46302478	46303442
chr1	46466708	46467332
chr1	46718591	46719441
chr1	47313822	47314526
chr1	47333452	47334522
chr1	47491579	47492617
chr1	47997328	47998032
chr1	50023314	50024436
chr1	50977659	50978495
chr1	51616830	51618067
chr1	52141545	52142721
chr1	52365827	52366936
chr1	52726116	52726974
chr1	52842542	52843457
chr1	52921039	52922089
chr1	53539322	53540247
chr1	53837919	53838895
chr1	54053045	54054191
chr1	54228815	54229899
chr1	54406010	54407034
chr1	54488163	54488835
chr1	54541879	54542595
chr1	54764141	54764797
chr1	54887792	54888654
chr1	55214169	55215540
chr1	56644773	56645821
chr1	58778966	58779672
chr1	58779871	58780481
chr1	58780831	58781952
chr1	58782927	58783672
chr1	58785590	58786432
chr1	62435976	62437083
chr1	63322052	63322895
chr1	63323426	63324867
chr1	63366902	63368126
chr1	63523034	63523770
chr1	64744567	64745423
chr1	65002244	65003072
chr1	65147376	65148395
chr1	65254111	65255000
chr1	65419626	65421151
chr1	66924519	66925504
chr1	67684754	67685786
chr1	67686287	67687107
chr1	67832998	67833878
chr1	70410321	70411394
chr1	75724126	75725127
chr1	75785740	75786627
chr1	77978127	77979621
chr1	81175091	81175952
chr1	81800949	81802240
chr1	84506013	84507017
chr1	85200294	85201720
chr1	85276126	85276909
chr1	85580411	85581706
chr1	86913991	86915046
chr1	88992191	88993296
chr1	89524222	89525671
chr1	89994661	89995608
chr1	91404300	91404990
chr1	91885935	91886908
chr1	92485189	92486299
chr1	92784353	92785355
chr1	93180260	93180931
chr1	93846203	93846911
chr1	93847045	93847792
chr1	93909250	93909878
chr1	94417809	94418655
chr1	94925969	94927509
chr1	95233768	95234518
chr1	98045068	98045926
chr1	100132455	100133221
chr1	100895375	100896289
chr1	103525186	103526095
chr1	108746134	108746809
chr1	108746877	108747578
chr1	108962910	108963717
chr1	109041340	109042751
chr1	109213273	109214269
chr1	109248723	109249933
chr1	109282894	109283789
chr1	109397464	109398440
chr1	109483270	109483821
chr1	109483852	109484411
chr1	110209950	110211194
chr1	110338082	110339956
chr1	111139569	111140904
chr1	111507667	111508629
chr1	111619498	111620523
chr1	112619118	112620013
chr1	112706288	112707655
chr1	112714942	112716316
chr1	113390444	113391451
chr1	113812084	113812767
chr1	113904681	113905574
chr1	114152518	114153215
chr1	114669576	114670431
chr1	114716138	114716986
chr1	119139810	119141120
chr1	119647488	119648744
chr1	145823418	145824736
chr1	145857374	145859396
chr1	145926985	145928040
chr1	145960168	145961300
chr1	147598686	147599442
chr1	147599858	147600589
chr1	149886392	149887257
chr1	150066801	150068227
chr1	150363453	150364332
chr1	150571560	150572507
chr1	150578842	150579953
chr1	150628919	150629919
chr1	150876064	150877125
chr1	150973867	150974490
chr1	150974514	150975142
chr1	151281758	151282535
chr1	151283476	151284611
chr1	151347043	151348260
chr1	151611765	151613115
chr1	151790123	151791184
chr1	151838121	151839112
chr1	153670348	153671265
chr1	153922565	153923265
chr1	153945767	153946978
chr1	153958173	153959051
chr1	154182981	154183893
chr1	154220450	154221073
chr1	154272201	154273133
chr1	154936506	154937450
chr1	154974173	154975154
chr1	155000537	155001495
chr1	155007019	155008240
chr1	155050450	155051604
chr1	155084581	155085756
chr1	155127593	155128365
chr1	155135474	155136698
chr1	155192579	155193792
chr1	155194302	155195250
chr1	155208668	155209629
chr1	155322956	155323782
chr1	155324050	155324982
chr1	155325083	155325924
chr1	156114748	156115422
chr1	156245362	156247867
chr1	156337906	156339107
chr1	156456408	156457708
chr1	156499876	156501479
chr1	156572092	156573058
chr1	156659488	156660385
chr1	156661068	156662240
chr1	156705416	156706079
chr1	156746492	156747341
chr1	156751244	156752370
chr1	156766929	156768132
chr1	156892871	156894090
chr1	156927495	156928240
chr1	161201805	161202726
chr1	162069235	162070363
chr1	166838994	166840367
chr1	167220508	167221160
chr1	167221359	167222362
chr1	167454590	167455804
chr1	167935776	167937494
chr1	168225606	168226353
chr1	169106078	169107388
chr1	171841098	171841939
chr1	172532346	172533526
chr1	173867262	173867962
chr1	173868053	173868708
chr1	174158872	174160072
chr1	178093527	178094087
chr1	178094100	178094699
chr1	178542420	178543436
chr1	178725129	178726576
chr1	179025564	179026340
chr1	179026559	179027194
chr1	179954335	179955652
chr1	180154595	180155409
chr1	181022524	181023292
chr1	181088226	181088998
chr1	181104773	181105920
chr1	182390538	182391355
chr1	182391422	182392094
chr1	182838845	182839990
chr1	183022363	183024380
chr1	183471048	183471721
chr1	183472964	183473517
chr1	184386591	184387439
chr1	184754529	184755375
chr1	185156748	185157626
chr1	186375265	186376046
chr1	198158690	198159657
chr1	200669384	200670447
chr1	201023325	201024412
chr1	201982905	201983875
chr1	202348285	202349211
chr1	202888447	202889366
chr1	202966224	202967410
chr1	203026105	203027050
chr1	204072844	204073912
chr1	204515614	204516645
chr1	204806606	204807599
chr1	205210645	205211207
chr1	205211308	205211945
chr1	205631232	205632230
chr1	205749104	205750118
chr1	206612078	206612833
chr1	209616860	209617666
chr1	211578963	211579999
chr1	211830234	211831146
chr1	212034885	212035930
chr1	212414474	212415622
chr1	212432472	212433341
chr1	212608149	212610216
chr1	213015100	213016114
chr1	213051009	213051830
chr1	214550611	214551635
chr1	220046085	220046956
chr1	222814770	222815570
chr1	223142793	223143587
chr1	223712426	223713344
chr1	223845083	223846754
chr1	224356643	224357841
chr1	224434405	224435863
chr1	224615883	224616788
chr1	225427181	225428536
chr1	225470171	225471163
chr1	225652563	225654127
chr1	225771834	225772589
chr1	225809876	225810548
chr1	225845485	225846440
chr1	225881849	225883261
chr1	225923430	225924574
chr1	225999112	226000327
chr1	226061387	226062004
chr1	226083115	226084425
chr1	226121237	226122938
chr1	226308156	226308840
chr1	226309017	226309682
chr1	226407451	226408421
chr1	226870001	226871139
chr1	226939762	226941075
chr1	227317832	227318997
chr1	227731806	227732496
chr1	227732551	227733254
chr1	227735014	227735848
chr1	227786786	227787574
chr1	227788255	227789155
chr1	227940395	227941165
chr1	228006445	228007339
chr1	228059642	228060465
chr1	228081681	228083224
chr1	228101797	228103590
chr1	228105790	228106779
chr1	228108558	228109731
chr1	228109981	228110621
chr1	228139646	228140511
chr1	228151857	228153283
chr1	228155224	228156138
chr1	228159596	228160586
chr1	228161735	228162575
chr1	228166178	228167186
chr1	228173745	228176020
chr1	228213234	228213879
chr1	228214110	228214838
chr1	228406246	228407567
chr1	228457601	228458154
chr1	228458317	228458911
chr1	228487135	228488195
chr1	228646602	228647221
chr1	229342034	229343305
chr1	229558353	229559533
chr1	229625679	229626931
chr1	230066473	230067412
chr1	230425313	230426827
chr1	230641641	230643063
chr1	230693785	230695063
chr1	230867956	230868734
chr1	231161947	231162948
chr1	231240755	231241592
chr1	231337483	231338675
chr1	231421610	231422803
chr1	231527925	231528911
chr1	232629213	232629842
chr1	232630001	232631061
chr1	233904848	233906153
chr1	234477828	234479246
chr1	234608127	234609309
chr1	234609821	234611521
chr1	234780392	234781230
chr1	235326656	235328358
chr1	235367040	235367805
chr1	235649453	235650093
chr1	235866552	235867604
chr1	236064032	236065475
chr1	236604034	236605680
chr1	240091332	240092372
chr1	240254217	240255169
chr1	241355935	241357780
chr1	241639984	241640730
chr1	241847665	241848255
chr1	241848300	241848962
chr1	244048092	244049737
chr1	244451544	244452492
chr1	244652014	244652634
chr1	244653024	244653716
chr1	244834735	244836007
chr1	244862459	244863080
chr1	244863288	244864978
chr1	244971146	244971725
chr10	134569	136059
chr10	931191	932359
chr10	987893	989041
chr10	1048857	1049816
chr10	5812622	5813983
chr10	5889142	5890859
chr10	6088547	6089250
chr10	6202376	6203807
chr10	6579767	6580860
chr10	11134384	11135326
chr10	12042176	12043577
chr10	12068273	12069176
chr10	12129320	12130066
chr10	13099843	13100614
chr10	13299168	13300284
chr10	14837637	14838751
chr10	14877857	14879095
chr10	14959001	14959950
chr10	15370204	15371019
chr10	15860048	15860752
chr10	17228312	17229341
chr10	21500050	21501320
chr10	21516088	21517049
chr10	21533746	21535116
chr10	23438212	23439135
chr10	23439814	23440537
chr10	24722972	24723966
chr10	25016056	25017601
chr10	26860582	26861358
chr10	28532603	28533682
chr10	28676739	28677813
chr10	29409270	29410101
chr10	30434181	30434954
chr10	31318490	31319070
chr10	31319670	31320506
chr10	31602986	31603894
chr10	32345890	32347876
chr10	35126413	35127556
chr10	35641705	35642727
chr10	37976124	37977006
chr10	38010686	38011361
chr10	43396824	43397570
chr10	43436486	43437344
chr10	44926219	44927312
chr10	45672325	45673260
chr10	46022957	46023879
chr10	46539915	46541519
chr10	46545746	46546511
chr10	46555148	46555866
chr10	48450525	48451394
chr10	49537811	49539089
chr10	50622507	50623293
chr10	50623711	50624885
chr10	52314021	52315237
chr10	58268644	58269644
chr10	63465149	63466325
chr10	65084354	65085391
chr10	68332420	68333325
chr10	68407022	68407624
chr10	68527033	68528054
chr10	68955957	68956740
chr10	69408342	69409451
chr10	70145510	70146668
chr10	70169525	70170218
chr10	70170272	70171106
chr10	70232902	70233916
chr10	70381873	70383018
chr10	70403540	70404580
chr10	70815706	70816754
chr10	71235335	71236239
chr10	71279225	71280132
chr10	71772653	71773809
chr10	71811689	71812693
chr10	71850735	71851619
chr10	71963637	71964632
chr10	71964866	71966134
chr10	72260587	72261352
chr10	72273493	72274667
chr10	72329295	72330577
chr10	73096319	73097409
chr10	73246633	73247610
chr10	73413513	73414540
chr10	73744072	73744758
chr10	73785342	73786203
chr10	73811317	73812240
chr10	74824885	74825977
chr10	74826455	74827203
chr10	75111058	75112545
chr10	75209853	75211086
chr10	75234851	75235993
chr10	75394304	75395557
chr10	75397601	75398302
chr10	75398551	75399265
chr10	75399544	75400237
chr10	75400660	75401329
chr10	75402339	75402986
chr10	75404011	75404837
chr10	75407697	75408571
chr10	76111952	76112897
chr10	78033282	78034156
chr10	79068596	79069928
chr10	79157416	79158210
chr10	79242997	79244206
chr10	79386108	79387104
chr10	79405097	79406153
chr10	80203276	80204041
chr10	80453529	80454646
chr10	84327856	84329337
chr10	86364266	86365189
chr10	86521492	86522183
chr10	86755866	86756758
chr10	86942483	86943845
chr10	87094577	87096015
chr10	87862831	87863781
chr10	88879977	88881156
chr10	89644214	89645223
chr10	89700820	89702045
chr10	91798188	91799137
chr10	92239166	92240161
chr10	92290328	92291526
chr10	92592754	92593702
chr10	94545586	94546495
chr10	95693617	95694361
chr10	96586115	96587583
chr10	96831773	96833776
chr10	97334554	97335460
chr10	97445801	97446892
chr10	97497631	97499384
chr10	97640137	97641092
chr10	97686849	97687798
chr10	98414276	98415322
chr10	99328973	99330495
chr10	99619711	99621589
chr10	100009546	100010487
chr10	100185478	100186412
chr10	100286186	100286951
chr10	100373078	100373950
chr10	100998895	101000189
chr10	101006417	101007150
chr10	101030186	101031539
chr10	101579009	101580023
chr10	101779830	101781186
chr10	101817463	101819018
chr10	101819035	101819750
chr10	102055634	102056382
chr10	102064738	102065727
chr10	102114718	102115464
chr10	102132375	102133498
chr10	102230158	102231053
chr10	102245122	102245982
chr10	102400080	102401450
chr10	102419213	102419992
chr10	102420579	102421631
chr10	102502071	102503154
chr10	102503490	102504527
chr10	102615023	102615801
chr10	102642043	102643008
chr10	102644110	102646372
chr10	102660687	102661601
chr10	102713582	102714984
chr10	102869118	102870432
chr10	102917347	102918271
chr10	102918484	102919107
chr10	103367824	103368985
chr10	103601881	103602715
chr10	103697790	103698641
chr10	103966342	103967615
chr10	104121353	104122315
chr10	104231870	104232639
chr10	104268703	104269432
chr10	110007205	110008449
chr10	110225335	110226381
chr10	110497120	110498311
chr10	110567221	110568158
chr10	110871507	110872926
chr10	110918280	110920252
chr10	111076151	111076923
chr10	111076989	111077636
chr10	112949579	112950309
chr10	112951232	112952831
chr10	113679325	113680428
chr10	114821405	114822001
chr10	114822230	114823071
chr10	115092910	115094004
chr10	116669527	116670478
chr10	116742327	116743490
chr10	118046633	118047328
chr10	118341805	118342617
chr10	118754571	118755508
chr10	119029106	119030110
chr10	119030192	119030972
chr10	119080101	119081239
chr10	119595336	119596494
chr10	119650779	119651571
chr10	119652027	119652588
chr10	119725405	119726469
chr10	120979246	120980199
chr10	121974694	121975755
chr10	122954006	122954766
chr10	122980185	122980836
chr10	123008448	123009491
chr10	123132976	123133891
chr10	123147900	123149001
chr10	123153865	123154625
chr10	123994290	123995085
chr10	123995187	123995901
chr10	124093024	124093815
chr10	124418452	124419502
chr10	124529987	124530737
chr10	124916288	124917348
chr10	125159277	125160476
chr10	125160891	125161483
chr10	125161605	125162211
chr10	125719261	125719958
chr10	125822682	125823849
chr10	127906575	127907696
chr10	129963591	129964693
chr10	130110025	130111341
chr10	131981263	131982331
chr10	132391141	132391836
chr10	132396561	132397585
chr10	132446020	132447153
chr10	132536748	132538279
chr10	132793410	132794439
chr10	132959974	132961057
chr10	133197874	133198829
chr10	133212753	133213966
chr10	133252278	133252953
chr10	133254916	133255828
chr10	133267135	133268064
chr10	133269614	133270440
chr10	133270594	133271535
chr10	133272187	133272888
chr10	133274540	133275458
chr10	133276257	133276944
chr10	133308803	133309908
chr10	133318348	133319497
chr10	133336230	133337036
chr10	133356656	133358274
chr10	133378570	133379738
chr10	133393861	133394648
chr11	207049	207893
chr11	406373	407797
chr11	447832	448650
chr11	694650	696227
chr11	746724	747625
chr11	776602	777350
chr11	777378	777955
chr11	797398	798910
chr11	805066	805917
chr11	808797	810021
chr11	819289	820408
chr11	821703	823000
chr11	832459	833642
chr11	841864	842713
chr11	843153	844834
chr11	844890	845835
chr11	847794	848828
chr11	853025	854065
chr11	854637	855328
chr11	855419	856354
chr11	862601	863565
chr11	910372	911685
chr11	1388490	1389230
chr11	1389327	1390100
chr11	1390242	1391622
chr11	1763523	1764932
chr11	1868203	1869146
chr11	2377489	2378746
chr11	2399941	2400865
chr11	2404580	2405775
chr11	2423150	2424155
chr11	3797084	3798222
chr11	3855429	3856054
chr11	6234249	6235366
chr11	6611879	6612870
chr11	6682758	6683810
chr11	8262411	8263504
chr11	8682192	8683150
chr11	9264779	9265848
chr11	9314155	9315051
chr11	9460425	9461375
chr11	9572679	9573397
chr11	9573412	9574085
chr11	10294044	10295189
chr11	10307513	10308368
chr11	10808073	10808654
chr11	10808983	10809697
chr11	13277130	13277957
chr11	13668133	13669080
chr11	17386583	17387836
chr11	17388721	17389898
chr11	18395527	18396537
chr11	18526305	18527219
chr11	20387068	20388086
chr11	26331845	26332452
chr11	27362679	27363738
chr11	31810908	31811738
chr11	34051353	34052047
chr11	34052198	34052816
chr11	44095468	44096222
chr11	44565116	44565900
chr11	45180988	45182152
chr11	45846964	45848081
chr11	46700170	46701038
chr11	46845658	46846764
chr11	47269146	47270405
chr11	47407786	47408732
chr11	47410305	47411258
chr11	47553053	47553716
chr11	47564733	47566022
chr11	57335106	57336136
chr11	57667274	57668615
chr11	57711742	57712765
chr11	57740831	57741756
chr11	61580466	61581745
chr11	61891189	61892020
chr11	62573280	62574328
chr11	62591320	62592236
chr11	62601235	62602446
chr11	62612601	62613465
chr11	62621587	62622417
chr11	62652849	62653783
chr11	62705978	62707184
chr11	62726734	62728344
chr11	62753688	62754524
chr11	62761232	62762038
chr11	62804915	62806036
chr11	62831847	62832875
chr11	62840216	62841731
chr11	62850098	62850996
chr11	62855659	62856566
chr11	62881029	62882210
chr11	63614020	63614739
chr11	63762529	63763929
chr11	63838565	63839778
chr11	63974152	63975412
chr11	64185383	64186325
chr11	64234437	64235674
chr11	64240677	64241844
chr11	64241933	64242587
chr11	64251190	64252519
chr11	64269623	64270416
chr11	64304533	64305969
chr11	64757857	64758910
chr11	64777677	64778366
chr11	64778448	64779385
chr11	64810209	64811113
chr11	64847033	64847876
chr11	64878111	64879307
chr11	64888616	64889310
chr11	65040674	65041732
chr11	65111422	65112197
chr11	65116107	65118218
chr11	65181145	65182455
chr11	65354403	65355368
chr11	65416150	65416858
chr11	65418270	65419479
chr11	65425958	65426707
chr11	65429749	65430801
chr11	65497158	65497975
chr11	65540058	65540736
chr11	65570092	65570721
chr11	65625642	65626728
chr11	65637768	65638558
chr11	65711797	65712852
chr11	65779796	65780566
chr11	65780707	65781287
chr11	65857758	65858703
chr11	65859389	65860144
chr11	65860887	65861581
chr11	65888041	65888916
chr11	65918956	65919564
chr11	65920275	65921067
chr11	66051668	66052681
chr11	66256663	66257922
chr11	66257970	66258845
chr11	66288940	66289955
chr11	66311072	66311806
chr11	66371149	66372445
chr11	66616147	66617470
chr11	66637999	66639079
chr11	66842781	66844052
chr11	66855754	66856817
chr11	67118160	67119925
chr11	67239562	67240248
chr11	67298917	67299835
chr11	67373578	67374410
chr11	67401401	67402256
chr11	67418502	67419476
chr11	67420921	67421539
chr11	67507921	67508870
chr11	67629752	67630933
chr11	68026831	68027933
chr11	68030228	68030973
chr11	68312322	68313132
chr11	69048578	69049629
chr11	69646240	69647020
chr11	70270323	70270998
chr11	70271111	70271796
chr11	70397715	70398648
chr11	72080076	72081259
chr11	72112048	72113057
chr11	72643221	72644048
chr11	72813991	72814835
chr11	72821863	72822652
chr11	73141980	73142877
chr11	73307125	73307848
chr11	73308001	73308548
chr11	73375933	73376756
chr11	73876277	73877486
chr11	73982626	73983898
chr11	74170561	74171739
chr11	74492867	74493838
chr11	75398582	75399695
chr11	75582862	75583918
chr11	75768267	75769467
chr11	76208413	76209384
chr11	78188419	78189451
chr11	78417165	78418337
chr11	82899170	82900616
chr11	82901155	82901980
chr11	83156438	83157587
chr11	83285539	83286546
chr11	85664483	85665514
chr11	86068662	86069617
chr11	94543967	94545022
chr11	95229539	95230550
chr11	95789108	95789965
chr11	103090967	103091926
chr11	103109111	103109878
chr11	107017637	107018740
chr11	107928009	107928972
chr11	108222178	108223505
chr11	111602037	111602990
chr11	111926697	111927544
chr11	112962643	112963568
chr11	113875017	113876029
chr11	116772566	116773336
chr11	116791229	116792398
chr11	117178429	117179193
chr11	117315663	117317315
chr11	118435524	118436648
chr11	118790789	118791571
chr11	118909994	118910863
chr11	118928576	118929787
chr11	119018267	119019345
chr11	119053845	119054563
chr11	119054754	119055414
chr11	119056379	119057720
chr11	119094999	119095946
chr11	119101137	119102018
chr11	119121034	119122013
chr11	119205219	119206337
chr11	119372290	119372973
chr11	120169021	120170263
chr11	120210579	120211536
chr11	123061960	123063223
chr11	124799967	124800858
chr11	125569000	125569899
chr11	125950341	125951352
chr11	126268410	126269324
chr11	126354739	126356599
chr11	128522174	128522805
chr11	130069479	130070857
chr11	134069029	134070092
chr11	134275873	134276863
chr11_KI270830v1_alt	16492	17472
chr12	388922	389735
chr12	459764	460660
chr12	752509	753561
chr12	1593235	1594284
chr12	1690765	1691918
chr12	2876772	2877709
chr12	2958656	2959839
chr12	3297746	3298731
chr12	4030884	4031715
chr12	4273663	4274490
chr12	4538057	4539245
chr12	5944954	5946194
chr12	6311696	6312456
chr12	6335883	6336907
chr12	6469991	6471383
chr12	6493476	6494451
chr12	6532924	6533565
chr12	6534748	6535306
chr12	6535685	6536258
chr12	6536569	6537957
chr12	6553943	6554761
chr12	6567719	6568597
chr12	6613738	6614659
chr12	6662520	6663811
chr12	6688876	6689783
chr12	6753209	6754128
chr12	6763960	6764816
chr12	6765966	6767088
chr12	6851736	6852779
chr12	6868745	6869391
chr12	6869918	6870484
chr12	6870936	6872151
chr12	6872886	6873738
chr12	6890780	6891586
chr12	6914326	6915088
chr12	6924154	6925304
chr12	6935550	6936116
chr12	6936420	6937095
chr12	6940322	6941136
chr12	6943702	6945099
chr12	6955789	6956726
chr12	6961761	6962439
chr12	7970311	7971217
chr12	12266456	12267114
chr12	12267205	12267785
chr12	12812592	12813572
chr12	13100977	13102031
chr12	15910962	15911768
chr12	19129316	19130630
chr12	21501076	21502403
chr12	22544182	22545220
chr12	25958210	25959139
chr12	26114168	26114853
chr12	31590678	31591375
chr12	31958949	31959817
chr12	42238295	42238970
chr12	45728590	45729525
chr12	47705753	47706500
chr12	48716398	48717236
chr12	48814362	48815417
chr12	48996070	48997317
chr12	49018152	49019131
chr12	49060130	49060946
chr12	49110527	49111157
chr12	49129931	49131206
chr12	49294795	49295599
chr12	49322837	49323969
chr12	49366423	49367640
chr12	49559405	49560285
chr12	49623194	49623917
chr12	49707286	49707966
chr12	50167044	50167995
chr12	51025886	51026907
chr12	51083053	51083901
chr12	51217540	51218618
chr12	51238938	51239589
chr12	53006437	53007424
chr12	53180461	53181286
chr12	53379005	53379898
chr12	53380232	53380911
chr12	53451648	53452371
chr12	53500655	53501804
chr12	53625796	53626540
chr12	53938230	53939343
chr12	54017714	54018499
chr12	54279463	54280495
chr12	54378787	54379469
chr12	54379639	54380284
chr12	55646215	55647114
chr12	55728241	55729361
chr12	55817499	55818657
chr12	55973391	55974674
chr12	56104174	56105378
chr12	56127759	56128511
chr12	56315877	56316598
chr12	56333081	56334256
chr12	56359759	56360578
chr12	56448894	56449650
chr12	56488055	56488999
chr12	56636304	56637392
chr12	56645698	56646480
chr12	56686892	56687617
chr12	56687901	56688592
chr12	57078539	57079334
chr12	57185367	57186327
chr12	57737377	57738361
chr12	57751923	57753007
chr12	57754969	57756218
chr12	62466271	62467056
chr12	63779427	63780276
chr12	63843395	63844494
chr12	64221757	64222744
chr12	67069147	67069717
chr12	67268634	67269782
chr12	69238994	69239948
chr12	69470072	69470873
chr12	69738417	69739608
chr12	71663372	71664108
chr12	76763755	76764942
chr12	77065027	77066246
chr12	80936454	80937324
chr12	89353224	89354186
chr12	89708463	89709068
chr12	89709542	89710193
chr12	92928594	92929254
chr12	93441698	93442807
chr12	95473635	95474841
chr12	98515078	98515899
chr12	98593165	98593970
chr12	100142691	100143362
chr12	100266872	100267922
chr12	103929209	103930977
chr12	104137779	104138536
chr12	104456601	104457282
chr12	104957758	104958685
chr12	106248763	106250049
chr12	106773764	106775000
chr12	106955130	106955951
chr12	106956247	106956835
chr12	107685502	107686361
chr12	107760680	107761569
chr12	108562167	108563045
chr12	108731063	108731806
chr12	108731857	108732473
chr12	109097303	109098667
chr12	109713345	109714085
chr12	109900007	109900846
chr12	110280822	110282220
chr12	110468848	110469564
chr12	111841804	111842749
chr12	112125125	112125787
chr12	113184813	113185956
chr12	116737794	116738666
chr12	116818669	116819875
chr12	118372338	118373377
chr12	119988685	119989646
chr12	120086821	120087711
chr12	120116114	120116682
chr12	120116711	120117361
chr12	120291411	120292445
chr12	120437592	120438270
chr12	120495482	120496628
chr12	120640112	120641252
chr12	120686556	120687583
chr12	120903855	120904700
chr12	121209651	121210751
chr12	121296386	121297452
chr12	121352196	121352932
chr12	121626005	121626994
chr12	121686656	121687441
chr12	121712552	121713555
chr12	121793499	121794875
chr12	121839258	121840081
chr12	121888378	121889307
chr12	122225352	122226586
chr12	122500656	122501487
chr12	122526654	122527913
chr12	122752364	122753406
chr12	122974852	122976218
chr12	123383507	123384553
chr12	123388600	123389279
chr12	123533589	123534628
chr12	123971965	123972633
chr12	124863553	124864718
chr12	124939085	124940488
chr12	130162596	130163829
chr12	131894101	131895103
chr12	131903461	131904910
chr12	131928240	131929655
chr12	131949374	131950444
chr12	132083961	132084674
chr12	132133640	132134311
chr12	132339418	132340677
chr12	132550684	132551567
chr12	132558667	132559573
chr12	132571355	132572684
chr12	132619235	132619976
chr12	132687166	132688108
chr12	132761221	132762723
chr12	132907860	132909016
chr12	133037042	133038308
chr13	23579124	23579919
chr13	26050771	26052036
chr13	26253417	26254043
chr13	26254485	26255132
chr13	27953849	27954807
chr13	27968408	27969443
chr13	28819383	28820498
chr13	30464461	30465385
chr13	30465642	30466313
chr13	32586080	32586704
chr13	40665515	40666757
chr13	40770801	40771553
chr13	40789032	40789951
chr13	41060149	41061633
chr13	44577060	44578099
chr13	44917942	44918767
chr13	45341074	45341933
chr13	45417968	45418811
chr13	49443721	49445088
chr13	49935505	49937234
chr13	51583704	51584860
chr13	51803558	51804413
chr13	52455111	52455949
chr13	52845615	52846662
chr13	60395910	60396720
chr13	61766529	61767175
chr13	62007429	62008495
chr13	62046194	62047099
chr13	62141991	62142678
chr13	62167083	62168141
chr13	62624969	62625953
chr13	63436013	63436721
chr13	63566189	63567633
chr13	64074722	64075491
chr13	64263069	64263941
chr13	64662551	64663249
chr13	65313296	65314391
chr13	67225831	67226678
chr13	67229396	67230858
chr13	69419827	69420812
chr13	69923957	69925275
chr13	72022603	72023712
chr13	72727148	72728500
chr13	72781451	72782672
chr13	73058453	73059831
chr13	74133677	74135612
chr13	74157420	74158533
chr13	75481404	75482906
chr13	75549206	75550611
chr13	75635308	75636271
chr13	76885765	76886832
chr13	77026033	77027546
chr13	77328775	77329684
chr13	77697161	77697822
chr13	77697996	77698696
chr13	78602706	78603743
chr13	79405440	79406568
chr13	79432014	79432880
chr13	80339795	80340633
chr13	80340843	80341449
chr13	80341595	80342170
chr13	87670873	87671846
chr13	91398281	91398871
chr13	91399184	91399871
chr13	93226522	93227209
chr13	93227537	93228738
chr13	94548695	94549273
chr13	94549391	94549923
chr13	94595345	94596665
chr13	94601449	94602552
chr13	94711274	94712252
chr13	95676711	95677444
chr13	97433484	97434304
chr13	98142759	98143885
chr13	98576320	98577781
chr13	99086211	99086930
chr13	99968150	99968949
chr13	99970128	99971840
chr13	99979889	99980867
chr13	99981051	99981747
chr13	100674599	100675731
chr13	108218234	108219053
chr13	110706425	110707292
chr13	110712278	110713438
chr13	110713509	110714110
chr13	110715104	110716280
chr13	110914326	110915788
chr13	111153119	111153708
chr13	111153790	111154399
chr13	112894644	112895924
chr13	113209483	113210270
chr13	114281368	114281964
chr13	114314307	114315041
chr14	20342897	20343611
chr14	20461334	20462103
chr14	21103802	21104816
chr14	21476519	21477461
chr14	22588968	22590307
chr14	22928957	22929925
chr14	22981091	22981663
chr14	22982206	22982768
chr14	23094700	23095728
chr14	23285932	23286815
chr14	23320787	23322616
chr14	23351902	23352969
chr14	23468816	23469566
chr14	24140756	24142101
chr14	24146570	24147114
chr14	24147245	24147848
chr14	24367374	24368660
chr14	24429812	24430772
chr14	34874623	34875409
chr14	35046066	35046961
chr14	35825864	35826494
chr14	35826736	35827484
chr14	37591569	37592263
chr14	39102825	39103664
chr14	39266591	39267462
chr14	49633422	49635028
chr14	49862558	49863197
chr14	50830806	50831474
chr14	51093464	51095530
chr14	51651305	51652367
chr14	52552340	52553770
chr14	52694855	52695601
chr14	52791133	52792139
chr14	52950753	52951493
chr14	54396762	54397553
chr14	54566032	54567031
chr14	54773198	54774209
chr14	57389941	57391013
chr14	58297831	58298661
chr14	59188091	59188927
chr14	59484175	59484946
chr14	60514391	60515912
chr14	60656545	60657491
chr14	61694955	61695763
chr14	63543086	63544061
chr14	64338326	64339181
chr14	64387869	64388791
chr14	64540138	64541486
chr14	65101524	65103217
chr14	65469727	65470818
chr14	66507584	66508753
chr14	67359522	67360521
chr14	67674474	67675363
chr14	67695287	67696072
chr14	68795213	68796432
chr14	68978594	68979723
chr14	69152540	69153470
chr14	69484417	69485332
chr14	69766706	69767364
chr14	70907186	70907925
chr14	71320007	71321131
chr14	73851643	73852651
chr14	74084147	74085071
chr14	74492913	74494273
chr14	75126575	75127612
chr14	75258689	75259605
chr14	75276906	75277579
chr14	75277895	75278899
chr14	75280574	75282229
chr14	75293738	75294576
chr14	75660952	75661651
chr14	77027605	77028341
chr14	77028595	77029219
chr14	77040196	77040868
chr14	77320689	77322207
chr14	77376676	77377592
chr14	77616242	77617309
chr14	81220107	81220733
chr14	81220898	81221615
chr14	81436104	81436863
chr14	81533119	81534140
chr14	89416866	89418320
chr14	89955579	89956590
chr14	90382906	90383710
chr14	90396301	90397410
chr14	90827897	90828653
chr14	91060399	91061325
chr14	91371263	91372408
chr14	91416959	91418081
chr14	91509631	91511026
chr14	92686301	92687301
chr14	95515839	95517232
chr14	96204041	96205025
chr14	99480698	99481934
chr14	99603151	99603830
chr14	99603892	99604496
chr14	99683791	99684582
chr14	99734149	99735121
chr14	99792567	99793715
chr14	100192631	100193411
chr14	100238412	100239133
chr14	100240000	100240923
chr14	100306815	100307656
chr14	100541485	100542323
chr14	100547954	100548967
chr14	100549186	100550029
chr14	100585739	100586912
chr14	100607244	100608208
chr14	101947797	101948787
chr14	101960424	101961716
chr14	101964935	101965724
chr14	102086502	102087714
chr14	102139276	102140135
chr14	102362709	102363353
chr14	102507829	102509041
chr14	102516578	102517848
chr14	102591460	102592030
chr14	102923608	102924498
chr14	103057227	103058254
chr14	103122487	103123156
chr14	103123465	103124167
chr14	103333564	103334642
chr14	103384819	103385461
chr14	103385920	103386560
chr14	103520719	103521605
chr14	103521828	103523315
chr14	103528949	103530429
chr14	103537987	103539249
chr14	103542922	103543789
chr14	103562414	103563523
chr14	103628799	103629596
chr14	103698572	103699411
chr14	103707758	103708568
chr14	103714929	103716027
chr14	103847500	103849145
chr14	104113866	104115122
chr14	104149559	104150710
chr14	104705100	104706417
chr14	104724450	104725306
chr14	104752416	104753742
chr14	104800100	104801045
chr14	104826022	104826864
chr14	104865068	104865948
chr14	104968216	104969141
chr14	104978172	104978764
chr14	104981220	104982158
chr14	105020366	105021706
chr14	105087307	105088750
chr14	105167357	105168099
chr14	105174267	105175667
chr14	105201696	105202715
chr14	105300496	105301224
chr14	105301300	105301959
chr14	105419318	105420112
chr14	105439854	105440639
chr14	105458517	105459204
chr14	105462693	105463665
chr14	105464016	105464671
chr14	105465627	105466285
chr14	105473378	105474758
chr14	105480739	105481594
chr14	105481874	105483214
chr14	105483890	105484803
chr14	105499784	105500938
chr15	34337339	34338484
chr15	38251856	38252697
chr15	39933540	39934336
chr15	40092381	40093819
chr15	40322980	40323967
chr15	40438990	40440330
chr15	40440554	40441346
chr15	40894087	40894764
chr15	41115764	41116499
chr15	41773925	41775153
chr15	41827821	41828725
chr15	42272917	42273825
chr15	42574983	42575740
chr15	43510185	43511355
chr15	43776065	43777308
chr15	45198457	45199264
chr15	48331721	48332682
chr15	49046067	49046718
chr15	50354331	50355446
chr15	55407837	55408641
chr15	58331850	58332710
chr15	58770878	58771920
chr15	58932927	58934221
chr15	59688762	59689719
chr15	62060193	62060949
chr15	63504085	63504923
chr15	64153283	64153992
chr15	64162821	64163523
chr15	64355729	64356620
chr15	64841170	64842367
chr15	64989495	64990427
chr15	65132790	65133818
chr15	65304116	65305416
chr15	65385271	65386152
chr15	65421115	65422163
chr15	65422334	65423391
chr15	65516955	65517858
chr15	65530175	65531286
chr15	65610658	65611641
chr15	65792001	65792819
chr15	65869302	65870681
chr15	66293331	66294254
chr15	66356336	66357084
chr15	66497547	66498331
chr15	66504586	66505801
chr15	66698288	66698947
chr15	66701877	66702566
chr15	66841835	66842934
chr15	66847194	66847788
chr15	66883315	66884447
chr15	67065557	67067161
chr15	67254058	67255285
chr15	68053641	68054753
chr15	68228280	68229115
chr15	68229184	68230163
chr15	68277377	68278354
chr15	68559284	68560173
chr15	69160074	69161256
chr15	69298637	69299694
chr15	70015237	70016134
chr15	70096323	70097789
chr15	70098559	70099898
chr15	70100517	70101375
chr15	70763176	70764217
chr15	70853029	70853724
chr15	70853964	70854680
chr15	70891466	70892164
chr15	70892262	70892857
chr15	72117246	72118552
chr15	72230930	72231955
chr15	72272149	72273066
chr15	72473746	72474846
chr15	72475006	72475913
chr15	73051369	73051968
chr15	73052213	73052923
chr15	73368572	73369159
chr15	73633102	73634176
chr15	73683667	73684937
chr15	73940366	73941453
chr15	73991995	73992604
chr15	74133097	74133658
chr15	74235373	74236405
chr15	74302549	74303206
chr15	74373426	74374085
chr15	74460754	74461741
chr15	74540512	74541791
chr15	74602986	74604335
chr15	74615299	74616082
chr15	74619821	74620754
chr15	74759363	74760594
chr15	74781771	74782555
chr15	74783413	74784189
chr15	74818670	74819560
chr15	74842757	74843480
chr15	74872672	74873608
chr15	74937355	74938705
chr15	74956052	74957538
chr15	75023281	75024285
chr15	75212352	75213275
chr15	75359674	75360502
chr15	75367769	75368573
chr15	75450157	75452576
chr15	75453443	75455559
chr15	75639821	75640875
chr15	75647254	75648086
chr15	75663656	75664782
chr15	75675283	75676349
chr15	75676362	75677060
chr15	75720980	75721602
chr15	76161170	76162236
chr15	76345581	76346359
chr15	76904483	76905560
chr15	76931143	76932379
chr15	77029057	77030288
chr15	77419225	77420457
chr15	77616042	77616744
chr15	77632361	77633587
chr15	77636963	77638044
chr15	77820411	77821048
chr15	78007750	78008447
chr15	78149005	78150031
chr15	78437625	78438471
chr15	78506798	78508198
chr15	78620117	78621211
chr15	78809995	78810989
chr15	78933255	78934410
chr15	79923364	79924366
chr15	80058982	80060096
chr15	80403963	80405389
chr15	80694595	80695711
chr15	80778896	80779772
chr15	81323795	81324674
chr15	82045504	82046275
chr15	82046684	82047605
chr15	82646907	82647561
chr15	82647580	82648328
chr15	82708734	82709668
chr15	82749982	82750934
chr15	82809264	82809949
chr15	83066447	83067702
chr15	83446844	83447925
chr15	83653397	83654516
chr15	84600426	84601480
chr15	84657769	84658710
chr15	84715860	84716743
chr15	84748691	84749520
chr15	84816764	84817473
chr15	84980008	84981556
chr15	85794629	85795273
chr15	88467015	88468168
chr15	88620982	88621918
chr15	88638610	88639286
chr15	88802978	88803718
chr15	89318886	89319450
chr15	89319600	89320235
chr15	89321515	89322223
chr15	89333202	89333900
chr15	89334094	89335599
chr15	89410877	89411767
chr15	89575021	89576019
chr15	89665403	89666813
chr15	89749969	89750799
chr15	89750869	89751701
chr15	89776521	89777362
chr15	89893537	89894557
chr15	90102048	90102980
chr15	90157867	90158731
chr15	90184602	90185284
chr15	90200769	90201705
chr15	90351931	90352680
chr15	90387382	90387968
chr15	90529460	90530514
chr15	90716940	90717852
chr15	90837844	90839080
chr15	90876091	90877264
chr15	90883345	90884147
chr15	90884975	90885626
chr15	90902227	90902820
chr15	90903034	90903650
chr15	90934476	90935093
chr15	90936031	90936680
chr15	90954543	90955708
chr15	90959954	90961238
chr15	91852766	91853930
chr15	92393570	92394290
chr15	92655497	92656131
chr15	92714358	92715092
chr15	92882194	92883648
chr15	92903930	92904944
chr15	93029175	93030319
chr15	93036714	93037667
chr15	93049111	93049706
chr15	93049915	93050552
chr15	96330101	96330965
chr15	96330970	96331602
chr15	96353771	96354855
chr15	96356844	96357559
chr15	97959854	97960966
chr15	98292172	98293027
chr15	98647204	98648049
chr15	98649012	98649634
chr15	99104538	99105840
chr15	99251019	99252072
chr15	99427021	99428253
chr15	99564916	99565734
chr15	99566223	99566948
chr15	99732647	99734032
chr15	99956224	99957450
chr15	100126177	100127441
chr15	100601650	100602875
chr15	100919001	100920253
chr15	101200752	101201938
chr15	101251027	101251880
chr15	101276823	101278076
chr15	101315501	101316532
chr15	101489717	101490500
chr15	101492354	101493556
chr15	101495487	101496807
chr15	101497154	101497758
chr15	101501459	101502440
chr15	101522659	101523421
chr15	101535467	101536914
chr15	101540878	101542628
chr15	101561185	101562076
chr15	101562296	101563081
chr15	101609821	101611142
chr15	101615429	101616541
chr15	101618769	101619871
chr15	101723749	101724774
chr16	53352	54520
chr16	234267	235265
chr16	352235	353599
chr16	361700	362841
chr16	371306	372569
chr16	569073	570433
chr16	578518	579455
chr16	635730	637841
chr16	665950	667150
chr16	667729	668541
chr16	668662	669408
chr16	672191	673142
chr16	675076	676238
chr16	678943	679680
chr16	679758	680558
chr16	682650	683279
chr16	684211	685459
chr16	720590	721805
chr16	725954	727489
chr16	785498	786785
chr16	787848	788889
chr16	800851	801940
chr16	807395	808298
chr16	1093675	1094426
chr16	1182345	1183106
chr16	1201440	1202720
chr16	1308468	1310320
chr16	1342934	1343475
chr16	1351068	1352422
chr16	1611822	1612992
chr16	1677701	1678498
chr16	1705601	1706474
chr16	1772873	1774234
chr16	1781919	1783290
chr16	1792581	1793576
chr16	1826351	1827639
chr16	1942671	1943584
chr16	1958558	1959932
chr16	1960459	1962145
chr16	1964578	1965483
chr16	1971540	1972299
chr16	1983020	1983626
chr16	1984257	1984978
chr16	1986514	1987287
chr16	2023101	2023853
chr16	2047534	2048585
chr16	2154935	2155969
chr16	2205227	2205987
chr16	2213590	2215598
chr16	2267970	2268536
chr16	2268605	2269352
chr16	2339767	2340464
chr16	2340610	2341162
chr16	2459223	2461079
chr16	2471002	2471921
chr16	2500969	2501957
chr16	2511850	2513298
chr16	2513479	2514641
chr16	2519909	2520830
chr16	2528755	2530073
chr16	2531229	2532416
chr16	2537785	2538464
chr16	2720589	2721677
chr16	2751716	2753221
chr16	2767415	2768603
chr16	2769543	2771115
chr16	2868100	2868752
chr16	2882861	2883579
chr16	2905034	2906157
chr16	2966700	2967601
chr16	2968652	2969637
chr16	2970539	2971164
chr16	3003641	3004652
chr16	3020613	3021799
chr16	3023620	3024676
chr16	3106301	3107045
chr16	3134804	3135600
chr16	3182639	3183786
chr16	3188716	3190084
chr16	3282438	3283431
chr16	3400610	3401645
chr16	3717160	3718060
chr16	4115240	4116696
chr16	4183102	4184491
chr16	4253099	4253664
chr16	4253674	4254432
chr16	4263489	4264415
chr16	4271663	4272676
chr16	4693220	4694109
chr16	4733907	4734741
chr16	4802263	4803185
chr16	4847214	4848278
chr16	8963717	8964503
chr16	9090908	9092041
chr16	10944241	10945365
chr16	11255841	11256759
chr16	11668122	11669335
chr16	11742465	11743412
chr16	11796814	11797610
chr16	11915457	11916384
chr16	13919696	13920250
chr16	14285555	14286259
chr16	18801218	18802200
chr16	20806022	20807047
chr16	22190183	22191545
chr16	22296833	22298063
chr16	22298075	22298905
chr16	23557125	23557938
chr16	24539119	24540311
chr16	27203475	27204245
chr16	27549394	27550393
chr16	28292061	28293153
chr16	28845438	28846756
chr16	28863177	28864080
chr16	28879583	28880440
chr16	28924412	28925831
chr16	28949917	28951469
chr16	29805259	29806332
chr16	29807423	29808201
chr16	29811145	29811998
chr16	29815869	29816807
chr16	29858623	29859518
chr16	29862137	29863116
chr16	29863285	29863865
chr16	29900051	29900923
chr16	29925711	29926750
chr16	29961563	29962520
chr16	29973311	29974401
chr16	29990719	29991939
chr16	29993277	29994391
chr16	30002937	30004118
chr16	30005904	30006682
chr16	30020666	30021999
chr16	30026211	30027062
chr16	30075702	30076710
chr16	30083236	30084581
chr16	30091506	30092824
chr16	30095255	30096628
chr16	30183367	30184727
chr16	30355061	30356248
chr16	30369347	30370018
chr16	30370056	30371326
chr16	30377335	30378782
chr16	30394897	30396265
chr16	30406781	30407925
chr16	30525911	30526458
chr16	30526600	30527927
chr16	30558238	30559803
chr16	30571340	30572467
chr16	30609765	30610817
chr16	30650216	30651578
chr16	30657153	30658067
chr16	30658862	30660234
chr16	30697501	30698997
chr16	30747554	30748678
chr16	30761171	30761984
chr16	30762543	30763342
chr16	30774293	30775734
chr16	30778152	30779328
chr16	30893517	30894371
chr16	30921610	30922715
chr16	30924301	30925758
chr16	30927937	30928583
chr16	30948473	30949227
chr16	30953273	30954296
chr16	30964714	30965966
chr16	30996943	30998012
chr16	31141868	31143232
chr16	31458520	31459240
chr16	31459622	31460136
chr16	46688472	46689909
chr16	46746631	46747805
chr16	46831030	46831854
chr16	46883561	46884618
chr16	47143019	47144674
chr16	48384529	48385821
chr16	48609841	48610487
chr16	49281830	49282962
chr16	50152674	50153559
chr16	50741639	50742560
chr16	53130420	53131783
chr16	53503158	53503984
chr16	54928729	54929964
chr16	54930198	54930852
chr16	55508625	55509708
chr16	56425144	56426019
chr16	57092244	57092996
chr16	57447083	57447854
chr16	57474508	57475812
chr16	57535532	57536545
chr16	57562848	57564045
chr16	57735247	57736212
chr16	58000184	58001122
chr16	66604053	66605106
chr16	66830237	66831350
chr16	67109334	67110179
chr16	67170323	67171318
chr16	67394800	67395914
chr16	67430903	67431785
chr16	67480886	67481698
chr16	67539877	67540987
chr16	67561709	67562970
chr16	67805887	67806487
chr16	67806684	67807222
chr16	67846505	67847711
chr16	67935374	67936332
chr16	67943844	67945135
chr16	68235319	68236729
chr16	68236966	68238400
chr16	68244936	68245740
chr16	68448146	68449136
chr16	69131879	69132769
chr16	69311001	69311940
chr16	69339175	69340555
chr16	69565577	69566503
chr16	70381114	70382204
chr16	70685338	70686489
chr16	71288832	71289691
chr16	71722942	71723887
chr16	72008339	72009266
chr16	72093394	72094330
chr16	74984598	74985561
chr16	74998709	74999624
chr16	75244505	75246053
chr16	75250520	75251362
chr16	75464042	75465232
chr16	81006150	81006863
chr16	81007080	81008095
chr16	81095889	81096873
chr16	84013847	84014722
chr16	85277660	85278525
chr16	85612832	85613556
chr16	85688690	85689410
chr16	85750520	85751560
chr16	87316842	87317750
chr16	87383191	87384790
chr16	87391679	87392472
chr16	87392811	87393521
chr16	88452607	88453449
chr16	88498622	88500130
chr16	88527042	88527812
chr16	88569957	88570802
chr16	88662578	88663597
chr16	88737041	88737655
chr16	88738317	88738894
chr16	88755369	88756350
chr16	88783852	88784655
chr16	88785357	88786143
chr16	88803097	88804170
chr16	88804304	88805302
chr16	88805482	88807714
chr16	88808925	88809736
chr16	88809802	88810930
chr16	89167208	89167883
chr16	89169403	89170775
chr16	89171249	89172408
chr16	89190124	89191145
chr16	89201320	89202430
chr16	89247037	89248127
chr16	89301137	89302430
chr16	89490296	89491599
chr16	89507780	89508852
chr16	89560171	89561341
chr16	89563444	89564293
chr16	89564667	89565202
chr16	89565214	89566698
[truncated: 3,031 more rows]

## Sheet: Supplementary Table 1e
Genes with differential expression after treatment with ML216 (Fig.3C)	Genes with differential expression after treatment with NSC617145 (Fig.3C)
ENSG00000004487	ENSG00000005812
ENSG00000007202	ENSG00000006282
ENSG00000007944	ENSG00000006712
ENSG00000105419	ENSG00000007168
ENSG00000009844	ENSG00000007376
ENSG00000009954	ENSG00000007541
ENSG00000016391	ENSG00000011243
ENSG00000029363	ENSG00000011304
ENSG00000036257	ENSG00000012660
ENSG00000037241	ENSG00000013810
ENSG00000043143	ENSG00000015479
ENSG00000044574	ENSG00000039650
ENSG00000048162	ENSG00000030582
ENSG00000048392	ENSG00000039319
ENSG00000177732	ENSG00000183779
ENSG00000054598	ENSG00000044574
ENSG00000055044	ENSG00000050820
ENSG00000055130	ENSG00000052802
ENSG00000056097	ENSG00000054523
ENSG00000058804	ENSG00000055130
ENSG00000061938	ENSG00000055609
ENSG00000062194	ENSG00000055917
ENSG00000062650	ENSG00000056586
ENSG00000062822	ENSG00000057608
ENSG00000063046	ENSG00000058600
ENSG00000063854	ENSG00000059122
ENSG00000064651	ENSG00000059588
ENSG00000064961	ENSG00000062194
ENSG00000065154	ENSG00000062650
ENSG00000065526	ENSG00000062822
ENSG00000008300	ENSG00000185883
ENSG00000066583	ENSG00000064651
ENSG00000067064	ENSG00000064961
ENSG00000067606	ENSG00000065154
ENSG00000068137	ENSG00000065613
ENSG00000070495	ENSG00000065717
ENSG00000070540	ENSG00000066933
ENSG00000070669	ENSG00000067064
ENSG00000070831	ENSG00000067225
ENSG00000071564	ENSG00000068489
ENSG00000071894	ENSG00000069275
ENSG00000073350	ENSG00000069702
ENSG00000073712	ENSG00000070214
ENSG00000075624	ENSG00000070476
ENSG00000077782	ENSG00000070831
ENSG00000078369	ENSG00000071537
ENSG00000078403	ENSG00000228300
ENSG00000080824	ENSG00000071894
ENSG00000081791	ENSG00000072110
ENSG00000082898	ENSG00000072310
ENSG00000084652	ENSG00000072518
ENSG00000085741	ENSG00000072778
ENSG00000085872	ENSG00000073350
ENSG00000086758	ENSG00000073921
ENSG00000087191	ENSG00000075292
ENSG00000088247	ENSG00000075618
ENSG00000088899	ENSG00000075624
ENSG00000090006	ENSG00000076604
ENSG00000090447	ENSG00000078369
ENSG00000092203	ENSG00000079805
ENSG00000092853	ENSG00000080824
ENSG00000094631	ENSG00000081019
ENSG00000094804	ENSG00000082898
ENSG00000094916	ENSG00000083123
ENSG00000095739	ENSG00000083535
ENSG00000097007	ENSG00000083845
ENSG00000099326	ENSG00000083857
ENSG00000099625	ENSG00000084090
ENSG00000099904	ENSG00000085433
ENSG00000099910	ENSG00000086758
ENSG00000100216	ENSG00000087086
ENSG00000100221	ENSG00000088035
ENSG00000100242	ENSG00000088280
ENSG00000100304	ENSG00000088812
ENSG00000100307	ENSG00000088899
ENSG00000100345	ENSG00000090006
ENSG00000100348	ENSG00000091527
ENSG00000100422	ENSG00000092096
ENSG00000100441	ENSG00000092098
ENSG00000100714	ENSG00000094916
ENSG00000100796	ENSG00000096401
ENSG00000100836	ENSG00000099800
ENSG00000100982	ENSG00000099814
ENSG00000101182	ENSG00000099817
ENSG00000101752	ENSG00000100209
ENSG00000101935	ENSG00000100241
ENSG00000102225	ENSG00000100263
ENSG00000102393	ENSG00000100288
ENSG00000102974	ENSG00000100304
ENSG00000103342	ENSG00000100345
ENSG00000104738	ENSG00000100664
ENSG00000104824	ENSG00000100796
ENSG00000104885	ENSG00000100836
ENSG00000104904	ENSG00000100983
ENSG00000104960	ENSG00000101752
ENSG00000104980	ENSG00000101935
ENSG00000105197	ENSG00000101972
ENSG00000105204	ENSG00000102218
ENSG00000105323	ENSG00000102572
ENSG00000105325	ENSG00000102974
ENSG00000105376	ENSG00000103126
ENSG00000105401	ENSG00000103197
ENSG00000116717	ENSG00000103335
ENSG00000105426	ENSG00000103342
ENSG00000105429	ENSG00000103353
ENSG00000105568	ENSG00000103363
ENSG00000106144	ENSG00000104219
ENSG00000106683	ENSG00000104290
ENSG00000107341	ENSG00000104852
ENSG00000107404	ENSG00000105221
ENSG00000107816	ENSG00000105321
ENSG00000108465	ENSG00000105323
ENSG00000108468	ENSG00000105325
ENSG00000108557	ENSG00000105372
ENSG00000108651	ENSG00000105397
ENSG00000108671	ENSG00000105669
ENSG00000108829	ENSG00000105732
ENSG00000109332	ENSG00000105810
ENSG00000109436	ENSG00000106009
ENSG00000109685	ENSG00000106628
ENSG00000109971	ENSG00000106683
ENSG00000110321	ENSG00000106723
ENSG00000110958	ENSG00000106829
ENSG00000111142	ENSG00000107404
ENSG00000111640	ENSG00000107816
ENSG00000111641	ENSG00000107929
ENSG00000111737	ENSG00000107938
ENSG00000112029	ENSG00000108107
ENSG00000112096	ENSG00000108256
ENSG00000112242	ENSG00000108465
ENSG00000112245	ENSG00000108588
ENSG00000112658	ENSG00000109332
ENSG00000129675	ENSG00000109458
ENSG00000112739	ENSG00000109971
ENSG00000112972	ENSG00000110367
ENSG00000113013	ENSG00000110717
ENSG00000113194	ENSG00000111530
ENSG00000113368	ENSG00000111640
ENSG00000113558	ENSG00000111641
ENSG00000114268	ENSG00000111678
ENSG00000114735	ENSG00000111711
ENSG00000114767	ENSG00000111731
ENSG00000115053	ENSG00000112096
ENSG00000115091	ENSG00000112242
ENSG00000115310	ENSG00000112245
ENSG00000115539	ENSG00000112759
ENSG00000115649	ENSG00000112893
ENSG00000115738	ENSG00000112972
ENSG00000115875	ENSG00000113194
ENSG00000116062	ENSG00000113368
ENSG00000116288	ENSG00000113369
ENSG00000116649	ENSG00000113441
ENSG00000116667	ENSG00000113658
ENSG00000116688	ENSG00000113716
ENSG00000158106	ENSG00000114315
ENSG00000117500	ENSG00000114439
ENSG00000117528	ENSG00000115464
ENSG00000117632	ENSG00000115694
ENSG00000118007	ENSG00000116062
ENSG00000118523	ENSG00000116604
ENSG00000118705	ENSG00000116717
ENSG00000118922	ENSG00000116871
ENSG00000118971	ENSG00000117318
ENSG00000118985	ENSG00000117500
ENSG00000119242	ENSG00000117758
ENSG00000119285	ENSG00000118058
ENSG00000119782	ENSG00000118276
ENSG00000120129	ENSG00000118482
ENSG00000120705	ENSG00000119314
ENSG00000121274	ENSG00000119969
ENSG00000122257	ENSG00000120008
ENSG00000123143	ENSG00000121067
ENSG00000123983	ENSG00000121274
ENSG00000124486	ENSG00000121486
ENSG00000124733	ENSG00000121774
ENSG00000125450	ENSG00000122565
ENSG00000125484	ENSG00000122591
ENSG00000125743	ENSG00000122778
ENSG00000126457	ENSG00000123136
ENSG00000127022	ENSG00000123159
ENSG00000127445	ENSG00000123505
ENSG00000127586	ENSG00000123575
ENSG00000128159	ENSG00000063244
ENSG00000128228	ENSG00000124164
ENSG00000128272	ENSG00000124486
ENSG00000129351	ENSG00000124795
ENSG00000166949	ENSG00000125249
ENSG00000130024	ENSG00000125520
ENSG00000130309	ENSG00000126215
ENSG00000130706	ENSG00000126461
ENSG00000130826	ENSG00000126934
ENSG00000131398	ENSG00000127418
ENSG00000131467	ENSG00000127445
ENSG00000131653	ENSG00000127586
ENSG00000132382	ENSG00000127616
ENSG00000132434	ENSG00000128159
ENSG00000132463	ENSG00000129968
ENSG00000132471	ENSG00000130024
ENSG00000132475	ENSG00000130175
ENSG00000132507	ENSG00000130202
ENSG00000133226	ENSG00000130299
ENSG00000133316	ENSG00000130402
ENSG00000133812	ENSG00000130640
ENSG00000134308	ENSG00000130939
ENSG00000134759	ENSG00000131437
ENSG00000135316	ENSG00000131591
ENSG00000135387	ENSG00000131899
ENSG00000135446	ENSG00000132382
ENSG00000135521	ENSG00000132467
ENSG00000135801	ENSG00000132535
ENSG00000136238	ENSG00000133247
ENSG00000136295	ENSG00000134243
ENSG00000136381	ENSG00000134255
ENSG00000136450	ENSG00000134352
ENSG00000136518	ENSG00000135316
ENSG00000136603	ENSG00000135333
ENSG00000136828	ENSG00000135404
ENSG00000136938	ENSG00000135451
ENSG00000137834	ENSG00000135547
ENSG00000138166	ENSG00000135829
ENSG00000138668	ENSG00000135940
ENSG00000140386	ENSG00000137364
ENSG00000140400	ENSG00000137497
ENSG00000140443	ENSG00000137955
ENSG00000140450	ENSG00000138095
ENSG00000140474	ENSG00000138107
ENSG00000140479	ENSG00000138182
ENSG00000140691	ENSG00000138443
ENSG00000141002	ENSG00000138621
ENSG00000141030	ENSG00000138834
ENSG00000141522	ENSG00000139725
ENSG00000141551	ENSG00000140400
ENSG00000141696	ENSG00000140450
ENSG00000141756	ENSG00000140474
ENSG00000142303	ENSG00000140632
ENSG00000142541	ENSG00000140854
ENSG00000142657	ENSG00000140983
ENSG00000142871	ENSG00000141002
ENSG00000143376	ENSG00000141027
ENSG00000143384	ENSG00000141030
ENSG00000143549	ENSG00000141499
ENSG00000143621	ENSG00000141522
ENSG00000143799	ENSG00000141551
ENSG00000143819	ENSG00000141696
ENSG00000143878	ENSG00000141756
ENSG00000144136	ENSG00000141994
ENSG00000144381	ENSG00000142330
ENSG00000144749	ENSG00000142541
ENSG00000145912	ENSG00000143190
ENSG00000146247	ENSG00000143514
ENSG00000146592	ENSG00000143793
ENSG00000147649	ENSG00000143797
ENSG00000148840	ENSG00000143815
ENSG00000151135	ENSG00000144136
ENSG00000151461	ENSG00000144381
ENSG00000152102	ENSG00000144591
ENSG00000152455	ENSG00000145214
ENSG00000152642	ENSG00000145604
ENSG00000153187	ENSG00000145780
ENSG00000153395	ENSG00000146247
ENSG00000153560	ENSG00000146281
ENSG00000154001	ENSG00000146592
ENSG00000154370	ENSG00000146918
ENSG00000155090	ENSG00000147044
ENSG00000155111	ENSG00000147862
ENSG00000155189	ENSG00000148343
ENSG00000155438	ENSG00000148362
ENSG00000156671	ENSG00000148384
ENSG00000160957	ENSG00000148399
ENSG00000158417	ENSG00000148730
ENSG00000159131	ENSG00000148803
ENSG00000159593	ENSG00000149016
ENSG00000160214	ENSG00000149311
ENSG00000160226	ENSG00000149499
ENSG00000160305	ENSG00000149923
ENSG00000160360	ENSG00000149930
ENSG00000160796	ENSG00000151461
ENSG00000160949	ENSG00000151893
ENSG00000171794	ENSG00000152642
ENSG00000160972	ENSG00000152749
ENSG00000161203	ENSG00000152795
ENSG00000161960	ENSG00000153914
ENSG00000161980	ENSG00000153936
ENSG00000162607	ENSG00000153976
ENSG00000162664	ENSG00000154727
ENSG00000163468	ENSG00000155189
ENSG00000164032	ENSG00000156508
ENSG00000164040	ENSG00000071655
ENSG00000164164	ENSG00000156521
ENSG00000164305	ENSG00000157514
ENSG00000164896	ENSG00000158106
ENSG00000164944	ENSG00000158417
ENSG00000164983	ENSG00000158545
ENSG00000165097	ENSG00000158792
ENSG00000165102	ENSG00000159023
ENSG00000165119	ENSG00000159335
ENSG00000165156	ENSG00000159593
ENSG00000165244	ENSG00000159720
ENSG00000165556	ENSG00000160211
ENSG00000165669	ENSG00000160214
ENSG00000165804	ENSG00000160326
ENSG00000166411	ENSG00000160447
ENSG00000166507	ENSG00000160633
ENSG00000166598	ENSG00000097021
ENSG00000166794	ENSG00000160813
ENSG00000172037	ENSG00000160877
ENSG00000166974	ENSG00000160957
ENSG00000167085	ENSG00000160972
ENSG00000167258	ENSG00000161016
ENSG00000167371	ENSG00000161513
ENSG00000167491	ENSG00000161618
ENSG00000167797	ENSG00000161847
ENSG00000168010	ENSG00000162066
ENSG00000168036	ENSG00000162076
ENSG00000168066	ENSG00000162585
ENSG00000168135	ENSG00000162607
ENSG00000168209	ENSG00000162664
ENSG00000169045	ENSG00000162910
ENSG00000169710	ENSG00000163320
ENSG00000169714	ENSG00000163939
ENSG00000169756	ENSG00000164164
ENSG00000169813	ENSG00000164180
ENSG00000170027	ENSG00000164877
ENSG00000170248	ENSG00000164880
ENSG00000170345	ENSG00000164889
ENSG00000170515	ENSG00000164896
ENSG00000170540	ENSG00000164897
ENSG00000170558	ENSG00000164924
ENSG00000170581	ENSG00000164944
ENSG00000171045	ENSG00000164961
ENSG00000183248	ENSG00000165233
ENSG00000171848	ENSG00000165655
ENSG00000183496	ENSG00000165891
ENSG00000172270	ENSG00000166165
ENSG00000172531	ENSG00000166166
ENSG00000173065	ENSG00000166170
ENSG00000173548	ENSG00000166471
ENSG00000173621	ENSG00000166881
ENSG00000173638	ENSG00000166971
ENSG00000173801	ENSG00000166974
ENSG00000173821	ENSG00000167468
ENSG00000174010	ENSG00000167657
ENSG00000174306	ENSG00000167674
ENSG00000174371	ENSG00000167900
ENSG00000174943	ENSG00000168003
ENSG00000175029	ENSG00000168010
ENSG00000175324	ENSG00000168476
ENSG00000175756	ENSG00000168924
ENSG00000175938	ENSG00000169018
ENSG00000176171	ENSG00000169045
ENSG00000176619	ENSG00000169683
ENSG00000177042	ENSG00000169710
ENSG00000177084	ENSG00000169750
ENSG00000177192	ENSG00000169957
ENSG00000177595	ENSG00000170144
ENSG00000184232	ENSG00000170540
ENSG00000177889	ENSG00000170558
ENSG00000178585	ENSG00000170638
ENSG00000178950	ENSG00000171206
ENSG00000179041	ENSG00000171848
ENSG00000179262	ENSG00000172006
ENSG00000179604	ENSG00000172009
ENSG00000179933	ENSG00000172037
ENSG00000179950	ENSG00000172270
ENSG00000180730	ENSG00000172273
ENSG00000181192	ENSG00000172732
ENSG00000181873	ENSG00000172757
ENSG00000181924	ENSG00000173137
ENSG00000182154	ENSG00000173153
ENSG00000182446	ENSG00000173273
ENSG00000182481	ENSG00000173402
ENSG00000197355	ENSG00000173486
ENSG00000183527	ENSG00000173548
ENSG00000183741	ENSG00000173621
ENSG00000183751	ENSG00000173638
ENSG00000184009	ENSG00000173801
ENSG00000184226	ENSG00000174672
ENSG00000198914	ENSG00000174799
ENSG00000184897	ENSG00000160796
ENSG00000184916	ENSG00000174996
ENSG00000184990	ENSG00000175756
ENSG00000185033	ENSG00000175920
ENSG00000185189	ENSG00000176155
ENSG00000185298	ENSG00000176340
ENSG00000185324	ENSG00000176463
ENSG00000185513	ENSG00000177200
ENSG00000185813	ENSG00000177595
ENSG00000185883	ENSG00000177666
ENSG00000186432	ENSG00000177697
ENSG00000186480	ENSG00000177731
ENSG00000186812	ENSG00000178057
ENSG00000186834	ENSG00000178209
ENSG00000187514	ENSG00000178252
ENSG00000187555	ENSG00000197451
ENSG00000187634	ENSG00000178950
ENSG00000187735	ENSG00000179094
ENSG00000187961	ENSG00000204316
ENSG00000188157	ENSG00000124006
ENSG00000188883	ENSG00000179348
ENSG00000196187	ENSG00000179528
ENSG00000196262	ENSG00000179604
ENSG00000196547	ENSG00000179833
ENSG00000196576	ENSG00000179950
ENSG00000196652	ENSG00000180902
ENSG00000196700	ENSG00000180957
ENSG00000196950	ENSG00000181026
ENSG00000197102	ENSG00000181163
ENSG00000197119	ENSG00000181396
ENSG00000197170	ENSG00000182220
ENSG00000251322	ENSG00000183010
ENSG00000197451	ENSG00000183207
ENSG00000197860	ENSG00000183496
ENSG00000198408	ENSG00000183617
ENSG00000198435	ENSG00000183751
ENSG00000198492	ENSG00000184009
ENSG00000198668	ENSG00000184216
ENSG00000198752	ENSG00000184226
ENSG00000198830	ENSG00000184281
ENSG00000266714	ENSG00000185049
ENSG00000206053	ENSG00000185122
ENSG00000213079	ENSG00000185163
ENSG00000213199	ENSG00000185189
ENSG00000213551	ENSG00000185236
ENSG00000213563	ENSG00000185513
ENSG00000214655	ENSG00000185624
ENSG00000221968	ENSG00000185668
ENSG00000221978	ENSG00000185803
ENSG00000225828	ENSG00000185813
ENSG00000229807	ENSG00000185818
ENSG00000242372	ENSG00000185825
ENSG00000245532	ENSG00000178718
ENSG00000254772	ENSG00000186566
ENSG00000112679	ENSG00000187555
ENSG00000262814	ENSG00000187634
ENSG00000266412	ENSG00000187735
ENSG00000261455	ENSG00000187961
ENSG00000274012	ENSG00000188157
ENSG00000277443	ENSG00000188229
	ENSG00000188428
	ENSG00000188486
	ENSG00000188529
	ENSG00000188994
	ENSG00000189403
	ENSG00000196576
	ENSG00000196923
	ENSG00000196924
	ENSG00000196950
	ENSG00000196961
	ENSG00000197019
	ENSG00000197070
	ENSG00000197102
	ENSG00000197136
	ENSG00000197150
	ENSG00000179262
	ENSG00000197530
	ENSG00000197601
	ENSG00000197694
	ENSG00000198160
	ENSG00000198242
	ENSG00000198408
	ENSG00000198589
	ENSG00000198668
	ENSG00000198830
	ENSG00000198832
	ENSG00000198931
	ENSG00000204237
	ENSG00000179335
	ENSG00000204673
	ENSG00000204899
	ENSG00000205208
	ENSG00000213339
	ENSG00000213445
	ENSG00000214022
	ENSG00000215612
	ENSG00000225697
	ENSG00000225733
	ENSG00000175309
	ENSG00000237149
	ENSG00000243678
	ENSG00000245532
	ENSG00000249592
	ENSG00000253729
	ENSG00000254470
	ENSG00000254996
	ENSG00000264364
	ENSG00000266074
	ENSG00000267855
	ENSG00000269335
	ENSG00000269858
	ENSG00000277443
