# Supplementary material for: Genome-wide mapping of native co-localized G4s and R-loops in living cells
Source: eLife. 2024 Oct 11;13:RP99026. doi: 10.7554/eLife.99026 (PMC11469684; doi:10.7554/eLife.99026)
Supplement: Supplementary file 2. — (a) HepG4-seq peaks in mESCs (b) HBD-seq peaks in mESCs (c) Co-localized G4s and R-loops in mESCs (d) Co-localized G4s and R-loops in the promoters of mESCs (e) Co-localized G4s and R-loops in the enhancers of mESCs (f) Differential G4 and R-loop peaks in dhx9KO mESCs compared to WT mESCs (g) Genes with differential expression levels in dhx9KO mESCs compared to wild-type (WT) mESCs (h) Dhx9 CUT&Tag peaks in mESCs (i) Co-localized G4s and R-loops bound by Dhx9 in mESCs. [file elife-99026-supp2.xlsx]

## Sheet: Cover
Supplementary Table2: G4 and R-loop peaks in mESCs
Supplementary Table 2a: HepG4-seq peaks in mESCs
Supplementary Table 2b: HBD-seq peaks in mESCs
Supplementary Table 2c: Co-localized G4s and R-loops in mESCs
Supplementary Table 2d: Co-localized G4s and R-loops in the promoters of mESCs
Supplementary Table 2e: Co-localized G4s and R-loops in the enhancers of mESCs
Supplementary Table 2f: Differential G4 and R-loop peaks in dhx9KO mESCs compared to WT mESCs
Supplementary Table 2g: Genes with differential expression levels in dhx9KO mESCs compared to WT mESCs
Supplementary Table 2h: Dhx9 CUT&Tag peaks in mESCs
Supplementary Table 2i: Co-localized G4s and R-loops bound by Dhx9 in mESCs

## Sheet: Supplementary Table 2a
Chr	Start	End
chr1	3482837	3483307
chr1	3670287	3672702
chr1	3955802	3956595
chr1	4142541	4143129
chr1	4352212	4352762
chr1	4491377	4493872
chr1	4496426	4496807
chr1	4496994	4497732
chr1	4551031	4551729
chr1	4571251	4572181
chr1	4610018	4610548
chr1	4768861	4769596
chr1	4769950	4770525
chr1	4785296	4786146
chr1	4802460	4802869
chr1	4803046	4803432
chr1	4807423	4808356
chr1	4855252	4856285
chr1	4857372	4858651
chr1	4907732	4908259
chr1	4914396	4914905
chr1	4925640	4926633
chr1	4970067	4970959
chr1	5017766	5020133
chr1	5020260	5020581
chr1	5020655	5021628
chr1	5022833	5023893
chr1	5070192	5070628
chr1	5082784	5083651
chr1	5106319	5106957
chr1	5170240	5170565
chr1	5170707	5171162
chr1	5232822	5233380
chr1	5261806	5262132
chr1	5587979	5589035
chr1	5915253	5915879
chr1	5915992	5917538
chr1	6214004	6215536
chr1	6358787	6359792
chr1	6382753	6383203
chr1	6448776	6449480
chr1	6668176	6669428
chr1	6870226	6870830
chr1	7013575	7013903
chr1	7047302	7047864
chr1	7053227	7053841
chr1	7087816	7088264
chr1	7088445	7090059
chr1	7206027	7206542
chr1	7266257	7266789
chr1	7307867	7308371
chr1	7309049	7309903
chr1	7312041	7312981
chr1	7396779	7398655
chr1	7671279	7672327
chr1	7732609	7733376
chr1	7779461	7780007
chr1	8925352	8926045
chr1	8935711	8936354
chr1	9298445	9299074
chr1	9299138	9300339
chr1	9469269	9470453
chr1	9544756	9545737
chr1	9547942	9549071
chr1	9627222	9627961
chr1	9629869	9630584
chr1	9649225	9649739
chr1	9699434	9701177
chr1	9701687	9702392
chr1	9702939	9703521
chr1	9747406	9747740
chr1	9747813	9748878
chr1	9797714	9798792
chr1	9848104	9849120
chr1	9908411	9909521
chr1	9943687	9944601
chr1	9947096	9948028
chr1	9957115	9957822
chr1	9966713	9968518
chr1	9991014	9991527
chr1	10008950	10009527
chr1	10031378	10032323
chr1	10037263	10038422
chr1	10038674	10040458
chr1	10231513	10233735
chr1	10284649	10285575
chr1	10304303	10304789
chr1	10592638	10593009
chr1	10880239	10880678
chr1	10993387	10994030
chr1	11028922	11029341
chr1	11277717	11278357
chr1	11295180	11295736
chr1	11330066	11330538
chr1	11395385	11396289
chr1	11400869	11401610
chr1	11413623	11414992
chr1	12170509	12171085
chr1	12690658	12691296
chr1	12691787	12692761
chr1	12711263	12712022
chr1	12717948	12718456
chr1	12718592	12718796
chr1	12744467	12745535
chr1	12807852	12808425
chr1	12808609	12809090
chr1	12810911	12811862
chr1	12835992	12836378
chr1	12843803	12844346
chr1	12864916	12865507
chr1	12865635	12865963
chr1	12989509	12991577
chr1	12991972	12993571
chr1	12997190	12997653
chr1	13026537	13027085
chr1	13049331	13050681
chr1	13069355	13069955
chr1	13071978	13072581
chr1	13074503	13075075
chr1	13080652	13081489
chr1	13083803	13084344
chr1	13084455	13086020
chr1	13093375	13093760
chr1	13095537	13095908
chr1	13095973	13096128
chr1	13103162	13104585
chr1	13124375	13126096
chr1	13126475	13126806
chr1	13127028	13128666
chr1	13133196	13133972
chr1	13134078	13134678
chr1	13142102	13142824
chr1	13145439	13146000
chr1	13146090	13146568
chr1	13151219	13152307
chr1	13191760	13192279
chr1	13216116	13216741
chr1	13259108	13259951
chr1	13300536	13301685
chr1	13329578	13330015
chr1	13372047	13374950
chr1	13426359	13427222
chr1	13583987	13584941
chr1	13589096	13590486
chr1	13606649	13607320
chr1	13619388	13619817
chr1	13659116	13661425
chr1	13789313	13789970
chr1	14292082	14292739
chr1	14309453	14310463
chr1	14506198	14507718
chr1	14631728	14632279
chr1	14739676	14740077
chr1	14740151	14740575
chr1	14754974	14757431
chr1	14918730	14919046
chr1	15017572	15018244
chr1	15285947	15287406
chr1	15366121	15366657
chr1	15758165	15759508
chr1	15791177	15791514
chr1	15791632	15792202
chr1	15805293	15806496
chr1	15851827	15852944
chr1	15858568	15859098
chr1	15892128	15893112
chr1	15902418	15902874
chr1	16091449	16092240
chr1	16092718	16094052
chr1	16103851	16106708
chr1	16129459	16130759
chr1	16241061	16241548
chr1	16518322	16519613
chr1	16519692	16520170
chr1	16603545	16604470
chr1	16618555	16619828
chr1	16651046	16651632
chr1	16656205	16657706
chr1	16664696	16665968
chr1	16749230	16750169
chr1	17091749	17092341
chr1	17096600	17098268
chr1	17145162	17145868
chr1	17207404	17208086
chr1	17236022	17236457
chr1	17250602	17251296
chr1	17520470	17521566
chr1	17727035	17727890
chr1	18057602	18058911
chr1	18531584	18532221
chr1	18773841	18774364
chr1	19103698	19104136
chr1	19104376	19104962
chr1	19209746	19210636
chr1	19213949	19214484
chr1	19233777	19234302
chr1	19234851	19235166
chr1	19236218	19237204
chr1	19241367	19241716
chr1	20788409	20788925
chr1	20792825	20793535
chr1	20804986	20806076
chr1	20811652	20812305
chr1	20819845	20820725
chr1	20867417	20867952
chr1	20868253	20868640
chr1	20890318	20891162
chr1	20891513	20891779
chr1	20935297	20935725
chr1	20951066	20952240
chr1	20996542	20997548
chr1	21002484	21003112
chr1	21014430	21015117
chr1	21052881	21054470
chr1	21078611	21079891
chr1	21166187	21166862
chr1	21218413	21218990
chr1	21247798	21248891
chr1	21255538	21257205
chr1	21272057	21272510
chr1	21960528	21962747
chr1	22293987	22294308
chr1	22533055	22534326
chr1	22804969	22806459
chr1	23061853	23062442
chr1	23255804	23257078
chr1	23382541	23383713
chr1	23604215	23604966
chr1	23705301	23705885
chr1	23760736	23761301
chr1	23761393	23763600
chr1	23792755	23793150
chr1	23826798	23827552
chr1	23833050	23833764
chr1	23921507	23922683
chr1	23935258	23935577
chr1	24005419	24005827
chr1	24099429	24100856
chr1	24245827	24246405
chr1	24585848	24587705
chr1	24677340	24678089
chr1	24678234	24679299
chr1	25012604	25013293
chr1	25171514	25172003
chr1	25178169	25178807
chr1	25181962	25182493
chr1	25228548	25229055
chr1	25829697	25831036
chr1	26229480	26230066
chr1	26524511	26525558
chr1	26686845	26687778
chr1	26687970	26688338
chr1	27261226	27261715
chr1	27325496	27326028
chr1	28813774	28814263
chr1	30719622	30720024
chr1	30787197	30787849
chr1	30795455	30795952
chr1	30801634	30802290
chr1	30804649	30805092
chr1	30807891	30808345
chr1	30867761	30868164
chr1	30872724	30874569
chr1	30874629	30875155
chr1	30875864	30876503
chr1	30937519	30938335
chr1	30948421	30950424
chr1	31233484	31234054
chr1	32172056	32173314
chr1	32972206	32972780
chr1	33456108	33456781
chr1	33555450	33556795
chr1	33565675	33566224
chr1	33635895	33637164
chr1	33637565	33638424
chr1	33643184	33643946
chr1	33664581	33665393
chr1	33669326	33670876
chr1	33680491	33681346
chr1	33714848	33715280
chr1	33719454	33720579
chr1	33721786	33722805
chr1	33732899	33733404
chr1	33738578	33739033
chr1	33739269	33739632
chr1	33741254	33742205
chr1	33742603	33743302
chr1	33745620	33746303
chr1	33746820	33747472
chr1	33747882	33748562
chr1	33748862	33749404
chr1	33754976	33755361
chr1	33757094	33758142
chr1	33812765	33813759
chr1	33814020	33814854
chr1	33903527	33903854
chr1	33903945	33904370
chr1	33907309	33908376
chr1	33909114	33909760
chr1	33944829	33945485
chr1	33947729	33948288
chr1	33963185	33964026
chr1	34005629	34006171
chr1	34006228	34008194
chr1	34011041	34012243
chr1	34017500	34017892
chr1	34020005	34020568
chr1	34025936	34026625
chr1	34036663	34037086
chr1	34041139	34041706
chr1	34067638	34068191
chr1	34073485	34074447
chr1	34074453	34075374
chr1	34076917	34077888
chr1	34103290	34104437
chr1	34106869	34107514
chr1	34109980	34110574
chr1	34120527	34121660
chr1	34127751	34128183
chr1	34139053	34139975
chr1	34140150	34140587
chr1	34140648	34141130
chr1	34199865	34200923
chr1	34218174	34218638
chr1	34235978	34236942
chr1	34281159	34282389
chr1	34289029	34289902
chr1	34432758	34433681
chr1	34434652	34435383
chr1	34439078	34440265
chr1	34443487	34444590
chr1	34444725	34445055
chr1	34459347	34460613
chr1	34462207	34463321
chr1	34467987	34468794
chr1	34471802	34472351
chr1	34472698	34474101
chr1	34485659	34486297
chr1	34511042	34511305
chr1	34536497	34537631
chr1	34579248	34580040
chr1	34583909	34584543
chr1	34635524	34636025
chr1	34642346	34643027
chr1	34676211	34676842
chr1	34677257	34678424
chr1	34750339	34751203
chr1	34791188	34792069
chr1	34801606	34802443
chr1	34803267	34803699
chr1	34804215	34805048
chr1	34805885	34806709
chr1	34806862	34807538
chr1	34809518	34810795
chr1	34811522	34812120
chr1	34817456	34818048
chr1	34839132	34839621
chr1	34842401	34843385
chr1	34849759	34850273
chr1	34861382	34862054
chr1	34867008	34867530
chr1	34929894	34930310
chr1	34930499	34930912
chr1	35219865	35220349
chr1	35231990	35233009
chr1	35697702	35698353
chr1	35723443	35724140
chr1	35748889	35749390
chr1	35749724	35750380
chr1	35762978	35763771
chr1	35821827	35822266
chr1	35822452	35823182
chr1	35846160	35846882
chr1	35864908	35865574
chr1	35869263	35870353
chr1	35875059	35876237
chr1	35878328	35878805
chr1	35879649	35880324
chr1	35881542	35882193
chr1	35943853	35945248
chr1	36012372	36012905
chr1	36013607	36014597
chr1	36016793	36017648
chr1	36018159	36019384
chr1	36038464	36039049
chr1	36054618	36055609
chr1	36059811	36060288
chr1	36061804	36062873
chr1	36063157	36063569
chr1	36064358	36065447
chr1	36066029	36066574
chr1	36067248	36067626
chr1	36067686	36070041
chr1	36070159	36071061
chr1	36074642	36075736
chr1	36080511	36080934
chr1	36081009	36081332
chr1	36089539	36089937
chr1	36090650	36091047
chr1	36093111	36094245
chr1	36095743	36096300
chr1	36103396	36104815
chr1	36109275	36110325
chr1	36138970	36139857
chr1	36143052	36143524
chr1	36143926	36144436
chr1	36149343	36149854
chr1	36160147	36160952
chr1	36239299	36240583
chr1	36243764	36244647
chr1	36246576	36247339
chr1	36251337	36251756
chr1	36254619	36255198
chr1	36268823	36269952
chr1	36270426	36270837
chr1	36271581	36272463
chr1	36277205	36277778
chr1	36279137	36279789
chr1	36298898	36299683
chr1	36303736	36304154
chr1	36307354	36308290
chr1	36308571	36308871
chr1	36309139	36309572
chr1	36309856	36310479
chr1	36314301	36315307
chr1	36315481	36316499
chr1	36316718	36316981
chr1	36319766	36320351
chr1	36320808	36321789
chr1	36322791	36323841
chr1	36326055	36326602
chr1	36326860	36328163
chr1	36336514	36337020
chr1	36367757	36369792
chr1	36402452	36403007
chr1	36408851	36409494
chr1	36410486	36411987
chr1	36444564	36445720
chr1	36467279	36468200
chr1	36470948	36472905
chr1	36497115	36497880
chr1	36498475	36499032
chr1	36499276	36499687
chr1	36500218	36500998
chr1	36501110	36501551
chr1	36506392	36506823
chr1	36507267	36507905
chr1	36508022	36508351
chr1	36508953	36510079
chr1	36511320	36513173
chr1	36519821	36520165
chr1	36520321	36520588
chr1	36520812	36521830
chr1	36521994	36522522
chr1	36525115	36525712
chr1	36526487	36527210
chr1	36530676	36531417
chr1	36531485	36532582
chr1	36534646	36535784
chr1	36536112	36536408
chr1	36541558	36542219
chr1	36546200	36548567
chr1	36551558	36552542
chr1	36553607	36554063
chr1	36554755	36555110
chr1	36555687	36556164
chr1	36556273	36558620
chr1	36560599	36561986
chr1	36565078	36565516
chr1	36567888	36568477
chr1	36570292	36570930
chr1	36579717	36581110
chr1	36582735	36583882
chr1	36589140	36590867
chr1	36600124	36601074
chr1	36602832	36603708
chr1	36611364	36612238
chr1	36613503	36614005
chr1	36632722	36634304
chr1	36639825	36640949
chr1	36673047	36673512
chr1	36679487	36680009
chr1	36682533	36683667
chr1	36683946	36684569
chr1	36690808	36692373
chr1	36699404	36700186
chr1	36702140	36702919
chr1	36706882	36707388
chr1	36707637	36708191
chr1	36709272	36710643
chr1	36743907	36744925
chr1	36747119	36748154
chr1	36758595	36759209
chr1	36761559	36763124
chr1	36765234	36766004
chr1	36770505	36771645
chr1	36772102	36772563
chr1	36778130	36778526
chr1	36778759	36779534
chr1	36780559	36780897
chr1	36781019	36781919
chr1	36782147	36782617
chr1	36782857	36784092
chr1	36784594	36785746
chr1	36785842	36786768
chr1	36793838	36794045
chr1	36794249	36795103
chr1	36796400	36797309
chr1	36797436	36797914
chr1	36798065	36799010
chr1	36806318	36806833
chr1	36807742	36808186
chr1	36824117	36825252
chr1	36844972	36845540
chr1	36853855	36854621
chr1	36856955	36857388
chr1	36864515	36865151
chr1	36903024	36904445
chr1	36905082	36905607
chr1	36909838	36910304
chr1	36938764	36940490
chr1	36982129	36983225
chr1	36983580	36984100
chr1	36984278	36984835
chr1	36985429	36986316
chr1	36986651	36987217
chr1	36987498	36987835
chr1	36988089	36988971
chr1	36989438	36989881
chr1	36990177	36990474
chr1	36990593	36991083
chr1	37029012	37029788
chr1	37051447	37051941
chr1	37059956	37060585
chr1	37085011	37085670
chr1	37100634	37100952
chr1	37101621	37102249
chr1	37122149	37122614
chr1	37129791	37130377
chr1	37186633	37187498
chr1	37218461	37218927
chr1	37252879	37253712
chr1	37272373	37272858
chr1	37299517	37300609
chr1	37357650	37358211
chr1	37366715	37367379
chr1	37401666	37403027
chr1	37409669	37410106
chr1	37429362	37430967
chr1	37540346	37541697
chr1	37623726	37624973
chr1	37675855	37676419
chr1	37676462	37676761
chr1	37677434	37677966
chr1	37694319	37694814
chr1	37696177	37697158
chr1	37702091	37702567
chr1	37706389	37707083
chr1	37707909	37708532
chr1	37719245	37720305
chr1	37864391	37865625
chr1	37868339	37868916
chr1	37871744	37872803
chr1	37890083	37890782
chr1	37899928	37900801
chr1	37901860	37902253
chr1	37931764	37932166
chr1	37970614	37971395
chr1	37985623	37986725
chr1	37996216	37997663
chr1	37997723	37998724
chr1	38058348	38059040
chr1	38128864	38130564
chr1	38131213	38131590
chr1	38181167	38181710
chr1	38209992	38210550
chr1	38217936	38218440
chr1	38358634	38359580
chr1	38394379	38395227
chr1	38399084	38399529
chr1	38618840	38619520
chr1	38626423	38628140
chr1	38628436	38628698
chr1	38823777	38824480
chr1	38835579	38836787
chr1	38897239	38897699
chr1	38897767	38898293
chr1	38986979	38988243
chr1	39010636	39011052
chr1	39122492	39123131
chr1	39186502	39187065
chr1	39192270	39194739
chr1	39206667	39207206
chr1	39253310	39253586
chr1	39253871	39254333
chr1	39367587	39368583
chr1	39374361	39374776
chr1	39376264	39377459
chr1	39384250	39385288
chr1	39390808	39391518
chr1	39457798	39458916
chr1	39477724	39479153
chr1	39526520	39526921
chr1	39527379	39527892
chr1	39528922	39529813
chr1	39530250	39530957
chr1	39532511	39533171
chr1	39533445	39534353
chr1	39535396	39536397
chr1	39576282	39577933
chr1	39646973	39648188
chr1	39649965	39650986
chr1	39651090	39651430
chr1	39720579	39721295
chr1	39741045	39741515
chr1	39761961	39762536
chr1	39772023	39772992
chr1	39859211	39860179
chr1	39899973	39901669
chr1	39902692	39903385
chr1	39905920	39906468
chr1	39906933	39907766
chr1	39917526	39918450
chr1	39933450	39934705
chr1	39939385	39940134
chr1	39949846	39950579
chr1	39993864	39994583
chr1	39999596	40000304
chr1	40000499	40001052
chr1	40002081	40002663
chr1	40056921	40057804
chr1	40058479	40059541
chr1	40101372	40102022
chr1	40266465	40267014
chr1	40290664	40291203
chr1	40303073	40303628
chr1	40325844	40326396
chr1	40680921	40682138
chr1	40773479	40774752
chr1	40790361	40791096
chr1	41131345	41131864
chr1	42058258	42058855
chr1	42591719	42592299
chr1	42684243	42685254
chr1	42686157	42687102
chr1	42693897	42694330
chr1	42694444	42695260
chr1	42695575	42696198
chr1	42696399	42697018
chr1	42697297	42698904
chr1	42713211	42713622
chr1	42713707	42714069
chr1	42714305	42714992
chr1	42850951	42851725
chr1	42909245	42909888
chr1	42952515	42953725
chr1	43051407	43052335
chr1	43065573	43066413
chr1	43091836	43093229
chr1	43098305	43099199
chr1	43138100	43138706
chr1	43139668	43140178
chr1	43163079	43163504
chr1	43163589	43164404
chr1	43260379	43260885
chr1	43445037	43446912
chr1	43472243	43472738
chr1	43571055	43571575
chr1	43730461	43731030
chr1	43754833	43755343
chr1	43826624	43828205
chr1	43882742	43883351
chr1	43897602	43898362
chr1	43933441	43934716
chr1	44034864	44035805
chr1	44101624	44102819
chr1	44118339	44120696
chr1	44147517	44148420
chr1	44551346	44552781
chr1	45539061	45540048
chr1	45794830	45795944
chr1	45925060	45925861
chr1	45926031	45926642
chr1	46066589	46067193
chr1	46425407	46425865
chr1	46852527	46854330
chr1	46894186	46895071
chr1	47006040	47007149
chr1	47076432	47077049
chr1	47914350	47915285
chr1	48379978	48380604
chr1	48480031	48480502
chr1	49437428	49437950
chr1	50671327	50671891
chr1	50926198	50928317
chr1	51288994	51289991
chr1	51459035	51459646
chr1	51477316	51479001
chr1	51509012	51509425
chr1	51562550	51563456
chr1	51624615	51625051
chr1	51625266	51626059
chr1	51747442	51747950
chr1	51878966	51879836
chr1	51911352	51911924
chr1	51913065	51913488
chr1	51914808	51916278
chr1	51931554	51931985
chr1	52008360	52008989
chr1	52009107	52009380
chr1	52046919	52047461
chr1	52113451	52114077
chr1	52118950	52120159
chr1	52149978	52150370
chr1	52170064	52170363
chr1	52170972	52171685
chr1	52231964	52233876
chr1	52499624	52501101
chr1	52555438	52555962
chr1	52578306	52578914
chr1	52630406	52631348
chr1	52726262	52727838
chr1	52816997	52818093
chr1	52844508	52845628
chr1	52952215	52954115
chr1	52954148	52955427
chr1	52964513	52965020
chr1	53296573	53297561
chr1	53313273	53314014
chr1	53352285	53352924
chr1	53581229	53581987
chr1	53613268	53613840
chr1	53706298	53707077
chr1	53748603	53748810
chr1	53761318	53761953
chr1	53784540	53785602
chr1	53823768	53824072
chr1	53925267	53926023
chr1	54194181	54195373
chr1	54250276	54251228
chr1	54380775	54382025
chr1	54438331	54439250
chr1	54484762	54485322
chr1	54556972	54558264
chr1	54584352	54585816
chr1	54925492	54927063
chr1	54954912	54955211
chr1	54979452	54980457
chr1	55026762	55027873
chr1	55052071	55053508
chr1	55058568	55059377
chr1	55086875	55088687
chr1	55088776	55089191
chr1	55091904	55092250
chr1	55107031	55107806
chr1	55108151	55109467
chr1	55112088	55112875
chr1	55130818	55132006
chr1	55163781	55164490
chr1	55167414	55168009
chr1	55171838	55172273
chr1	55172716	55173476
chr1	55195514	55196109
chr1	55198552	55199356
chr1	55210323	55211511
chr1	55234489	55235460
chr1	55236832	55237974
chr1	55362261	55364233
chr1	55405409	55407469
chr1	55572771	55573221
chr1	55575778	55576565
chr1	55751109	55751582
chr1	55874179	55875076
chr1	55884476	55885057
chr1	56749512	56749979
chr1	56953375	56953844
chr1	56969283	56970331
chr1	56970621	56971270
chr1	56971360	56971787
chr1	56971996	56973974
chr1	56976365	56977002
chr1	56977156	56978580
chr1	56982284	56983382
chr1	57278373	57278998
chr1	57331236	57332007
chr1	57377184	57378466
chr1	57406059	57407532
chr1	57428821	57429289
chr1	57583568	57584055
chr1	57608231	57608934
chr1	57611603	57612597
chr1	57774102	57775877
chr1	57956245	57956807
chr1	57969512	57970440
chr1	57992244	57993047
chr1	57995618	57996187
chr1	57996276	57996736
chr1	58029228	58030518
chr1	58032995	58033520
chr1	58147580	58147976
chr1	58154284	58155095
chr1	58296251	58296764
chr1	58304194	58304790
chr1	58359403	58359879
chr1	58366537	58367481
chr1	58382701	58383165
chr1	58392422	58394111
chr1	58408127	58408626
chr1	58410575	58411128
chr1	58423010	58424490
chr1	58424650	58425630
chr1	58444476	58446174
chr1	58448362	58449246
chr1	58504101	58505246
chr1	58585548	58586876
chr1	58711397	58711899
chr1	58713285	58713777
chr1	58754549	58754948
chr1	58795370	58796299
chr1	58972719	58974386
chr1	59070708	59071641
chr1	59119518	59120651
chr1	59129978	59130580
chr1	59131027	59131584
chr1	59162618	59163311
chr1	59236617	59237753
chr1	59256517	59257294
chr1	59314773	59315530
chr1	59340670	59341225
chr1	59375859	59376993
chr1	59377176	59377715
chr1	59394778	59395554
chr1	59422418	59423904
chr1	59425693	59426063
chr1	59426954	59427454
chr1	59448219	59449881
chr1	59450526	59451316
chr1	59481196	59484076
chr1	59484935	59485367
chr1	59487615	59488045
chr1	59515744	59516933
chr1	59523185	59523745
chr1	59523825	59524633
chr1	59584655	59585002
chr1	59603803	59604420
chr1	59606391	59607457
chr1	59608850	59609264
chr1	59613584	59614079
chr1	59614419	59614910
chr1	59615156	59615890
chr1	59623389	59623907
chr1	59632082	59632536
chr1	59669963	59671448
chr1	59684570	59686075
chr1	59696864	59697396
chr1	59697852	59698378
chr1	59715461	59716113
chr1	59717469	59718378
chr1	59720680	59721610
chr1	59721934	59722309
chr1	59722376	59722802
chr1	59722952	59723555
chr1	59725519	59726119
chr1	59728594	59728865
chr1	59729076	59729451
chr1	59762117	59764250
chr1	59764351	59765060
chr1	59826605	59827241
chr1	59912281	59914303
chr1	59925863	59927624
chr1	60042305	60043527
chr1	60097384	60098785
chr1	60129764	60130200
chr1	60180031	60181349
chr1	60342956	60343989
chr1	60405604	60406313
chr1	60408956	60410378
chr1	60432543	60432970
chr1	60488869	60490169
chr1	60565221	60565733
chr1	60565927	60567530
chr1	60682379	60683096
chr1	60832528	60833400
chr1	60839257	60839554
chr1	60850906	60851508
chr1	60852624	60854421
chr1	60857473	60858315
chr1	61101767	61102373
chr1	61419694	61420379
chr1	61638488	61639492
chr1	61639565	61640085
chr1	62181418	62182297
chr1	62397671	62398798
chr1	62647900	62648574
chr1	62664830	62665309
chr1	62665396	62665809
chr1	62678169	62679416
chr1	62701069	62701398
chr1	62701473	62701970
chr1	62702637	62703960
chr1	62704691	62705459
chr1	62705781	62707190
chr1	62707405	62708335
chr1	62708438	62708776
chr1	62710106	62710556
chr1	62718716	62719276
chr1	62724718	62725433
chr1	62734002	62734567
chr1	62735962	62736444
chr1	62736696	62737186
chr1	62737904	62738677
chr1	62741907	62742935
chr1	62743048	62743903
chr1	62762540	62763261
chr1	62765403	62765841
chr1	62766212	62766557
chr1	62766667	62767190
chr1	62767463	62768029
chr1	62769011	62769647
chr1	62771649	62772785
chr1	62773366	62774112
chr1	62775984	62776669
chr1	62778698	62779444
chr1	62781856	62782988
chr1	62783110	62785335
chr1	62794030	62794922
chr1	62795377	62796096
chr1	62796343	62796858
chr1	62981763	62982312
chr1	62984379	62984977
chr1	63031201	63031662
chr1	63032057	63032767
chr1	63058522	63059084
chr1	63092051	63092529
chr1	63107669	63108216
chr1	63109966	63110399
chr1	63110599	63110812
chr1	63110986	63111135
chr1	63112944	63114362
chr1	63114435	63114799
chr1	63116692	63117629
chr1	63118135	63119043
chr1	63123968	63124508
chr1	63125160	63126117
chr1	63130051	63130841
chr1	63131364	63132102
chr1	63138044	63139535
chr1	63139698	63140542
chr1	63171901	63172701
chr1	63176114	63177961
chr1	63178052	63178638
chr1	63179902	63180991
chr1	63181049	63181866
chr1	63182265	63182508
chr1	63183654	63183934
chr1	63200033	63200795
chr1	63204131	63204748
chr1	63210025	63210731
chr1	63213378	63214341
chr1	63225930	63226239
chr1	63235727	63236499
chr1	63239321	63239930
chr1	63247043	63247367
chr1	63248002	63249278
chr1	63252295	63253353
chr1	63267790	63268339
chr1	63272726	63274043
chr1	63302660	63303523
chr1	63309466	63309861
chr1	63322241	63322730
chr1	63323424	63324142
chr1	63325715	63326593
chr1	63439077	63439456
chr1	63441035	63441581
chr1	63442261	63442794
chr1	63445188	63446922
chr1	63453276	63453806
chr1	63614237	63614860
chr1	63956345	63956805
chr1	63957052	63957448
chr1	64045959	64046439
chr1	64120411	64120922
chr1	64121033	64122580
chr1	64225925	64226626
chr1	64301165	64302224
chr1	64305087	64305993
chr1	64311346	64311910
chr1	64444996	64445728
chr1	64531803	64534120
chr1	64578609	64579191
chr1	64616687	64618061
chr1	64623680	64624163
chr1	64689886	64692030
chr1	64694710	64695499
chr1	64717473	64718027
chr1	64731316	64731887
chr1	64732151	64733341
chr1	64733431	64733824
chr1	64733887	64734326
chr1	64734663	64739255
chr1	64766572	64767210
chr1	64919095	64919798
chr1	64956383	64957118
chr1	64985199	64986448
chr1	65040828	65041095
chr1	65051313	65052398
chr1	65109800	65110482
chr1	65177992	65179675
chr1	65185255	65185885
chr1	65186330	65187228
chr1	65311105	65311939
chr1	65388273	65389146
chr1	66003693	66004457
chr1	66174564	66175807
chr1	66407487	66407992
chr1	66467823	66468981
chr1	66606478	66607015
chr1	66612096	66612730
chr1	66700075	66700455
chr1	66700515	66701462
chr1	66704403	66704841
chr1	66816465	66816739
chr1	66816911	66818243
chr1	66862545	66863484
chr1	67038414	67039016
chr1	67067716	67068600
chr1	67307616	67308103
chr1	67435699	67436481
chr1	69105654	69106703
chr1	69106854	69108373
chr1	69108492	69108898
chr1	69241876	69242268
chr1	69376609	69378608
chr1	69687004	69688015
chr1	69776992	69777487
chr1	69826691	69827370
chr1	70379673	70380434
chr1	70384278	70384642
chr1	70725489	70726141
chr1	71018660	71019368
chr1	71035456	71035894
chr1	71099786	71100480
chr1	71102143	71103449
chr1	71507233	71507933
chr1	71531605	71532143
chr1	71556576	71557748
chr1	71566501	71567050
chr1	71576307	71577161
chr1	71586935	71587860
chr1	71609165	71609924
chr1	71610904	71611463
chr1	71629312	71630101
chr1	71643210	71643996
chr1	71644919	71645887
chr1	71646074	71646499
chr1	71650627	71651211
chr1	71651332	71651842
chr1	71652503	71654276
chr1	71673361	71674477
chr1	72132724	72133376
chr1	72153168	72154679
chr1	72161655	72162445
chr1	72163667	72164661
chr1	72166549	72167297
chr1	72170901	72172026
chr1	72172808	72173111
chr1	72173716	72174204
chr1	72174859	72175410
chr1	72178801	72179383
chr1	72179694	72180589
chr1	72182968	72183554
chr1	72183619	72184281
chr1	72184340	72185494
chr1	72185649	72187068
chr1	72191406	72192171
chr1	72193312	72194477
chr1	72194912	72195855
chr1	72195873	72196731
chr1	72197042	72197518
chr1	72199392	72199882
chr1	72202228	72202775
chr1	72203175	72203381
chr1	72204854	72205995
chr1	72207117	72207738
chr1	72210777	72211167
chr1	72211486	72213094
chr1	72213643	72214961
chr1	72216636	72217881
chr1	72219228	72219604
chr1	72220000	72220590
chr1	72220725	72221527
chr1	72221646	72222257
chr1	72222475	72222926
chr1	72223801	72224464
chr1	72224545	72224964
chr1	72225131	72226234
chr1	72226321	72227502
chr1	72227597	72228391
chr1	72229000	72229440
chr1	72229987	72230578
chr1	72232832	72233381
chr1	72236070	72236940
chr1	72237271	72237924
chr1	72238127	72238753
chr1	72242407	72243474
chr1	72243656	72245149
chr1	72246038	72246591
chr1	72251437	72252073
chr1	72254210	72255020
chr1	72255119	72258078
chr1	72259630	72260166
chr1	72262013	72262742
chr1	72262985	72263526
chr1	72272794	72273532
chr1	72283917	72284614
chr1	72286159	72287082
chr1	72287311	72288054
chr1	72307029	72307817
chr1	72312289	72312600
chr1	72313123	72313738
chr1	72398376	72399283
chr1	72399859	72400603
chr1	72428406	72428945
chr1	72490707	72491323
chr1	72534414	72535441
chr1	72535808	72537535
chr1	72578229	72578802
chr1	72582758	72583750
chr1	72593430	72593872
chr1	72601320	72602297
chr1	72711214	72711996
chr1	72712583	72713316
chr1	72718250	72719578
chr1	72720446	72720756
chr1	72720959	72721371
chr1	72739266	72739907
chr1	72805612	72806664
chr1	72812798	72813235
chr1	72822598	72823334
chr1	72823702	72825091
chr1	72825311	72825629
chr1	72827754	72828343
chr1	72852385	72852851
chr1	72854014	72854586
chr1	72854827	72855196
chr1	72856263	72857186
chr1	72862293	72862559
chr1	72862696	72863467
chr1	72864283	72865302
chr1	72865597	72866237
chr1	72870904	72871349
chr1	72872566	72872841
chr1	72873145	72873418
chr1	72873484	72875509
chr1	72960107	72960916
chr1	72963169	72964202
chr1	73076228	73077202
chr1	73130295	73130857
chr1	73698304	73698827
chr1	73826108	73827050
chr1	73862649	73863420
chr1	73901124	73901971
chr1	73903786	73904259
chr1	73908714	73909554
chr1	73926304	73926610
chr1	73926842	73927317
chr1	73927777	73928324
chr1	73955378	73956108
chr1	73957863	73958988
chr1	73962533	73963392
chr1	73966290	73967438
chr1	73991586	73991909
chr1	73992154	73992966
chr1	73996227	73996493
chr1	73996771	73997197
chr1	74005001	74005439
chr1	74007202	74008367
chr1	74008700	74009071
chr1	74024817	74025582
chr1	74027476	74028365
chr1	74033269	74033846
chr1	74033958	74035192
chr1	74036298	74037567
chr1	74047723	74048051
chr1	74058060	74058865
chr1	74068191	74069098
chr1	74069191	74069857
chr1	74073925	74074434
chr1	74076066	74076600
chr1	74081148	74081733
chr1	74082288	74083269
chr1	74084120	74084940
chr1	74091023	74091604
chr1	74092366	74092626
chr1	74092710	74093203
chr1	74094492	74094876
chr1	74094947	74095184
chr1	74095434	74096198
chr1	74097970	74099285
chr1	74099808	74100325
chr1	74102866	74104518
chr1	74106560	74107250
chr1	74110852	74111998
chr1	74113033	74113812
chr1	74123062	74123644
chr1	74124088	74124977
chr1	74125218	74125680
chr1	74140827	74141692
chr1	74147277	74147947
chr1	74218301	74218835
chr1	74235939	74237730
chr1	74256877	74257321
chr1	74264242	74264986
chr1	74274829	74275694
chr1	74277054	74278330
chr1	74278465	74278844
chr1	74279085	74279768
chr1	74279940	74281706
chr1	74281839	74282404
chr1	74284123	74285895
chr1	74286513	74287227
chr1	74288542	74289254
chr1	74290200	74291118
chr1	74291396	74291782
chr1	74292156	74292854
chr1	74294032	74294696
chr1	74294783	74296423
chr1	74296501	74297047
chr1	74297117	74297769
chr1	74303504	74304637
chr1	74307466	74308669
chr1	74327096	74327999
chr1	74332232	74332900
chr1	74333056	74333445
chr1	74335094	74335572
chr1	74338025	74338646
chr1	74347225	74347573
chr1	74347691	74348016
chr1	74351783	74352864
chr1	74361839	74362242
chr1	74362678	74363544
chr1	74366087	74367267
chr1	74367567	74368661
chr1	74384461	74384821
chr1	74384889	74385530
chr1	74386636	74387439
chr1	74387675	74387948
chr1	74388036	74388381
chr1	74389549	74390004
chr1	74390123	74390283
chr1	74390941	74393354
chr1	74394710	74395359
chr1	74397228	74398510
chr1	74408544	74409849
chr1	74414908	74415305
chr1	74415831	74416183
chr1	74420149	74420955
chr1	74423514	74424096
chr1	74424815	74426274
chr1	74427311	74428358
chr1	74432321	74432854
chr1	74505136	74507262
chr1	74542591	74543270
chr1	74569691	74570098
chr1	74571027	74571513
chr1	74579288	74579619
chr1	74579803	74580284
chr1	74587099	74588665
chr1	74588898	74590451
chr1	74600737	74601861
chr1	74609359	74609798
chr1	74661335	74662770
chr1	74696911	74697714
chr1	74712699	74714226
chr1	74727964	74728716
chr1	74748605	74749121
chr1	74749234	74749710
chr1	74763222	74763578
chr1	74767606	74768203
chr1	74769823	74770455
chr1	74770919	74771440
chr1	74771591	74772451
chr1	74772884	74773725
chr1	74775794	74776241
chr1	74776881	74777324
chr1	74778938	74779455
chr1	74780260	74780649
chr1	74781787	74783420
chr1	74783635	74784762
chr1	74787967	74788281
chr1	74788643	74789221
chr1	74791002	74792534
chr1	74792787	74793686
chr1	74793961	74794405
chr1	74794571	74795377
chr1	74800202	74801266
chr1	74802522	74804120
chr1	74804379	74804918
chr1	74805267	74805958
chr1	74806148	74808726
chr1	74815096	74815505
chr1	74816330	74817521
chr1	74819286	74820138
chr1	74824435	74825389
chr1	74850209	74850695
chr1	74851368	74851774
chr1	74853652	74854139
chr1	74854367	74856716
chr1	74857231	74857511
chr1	74858098	74859075
chr1	74859635	74860186
chr1	74880760	74881124
chr1	74881707	74882714
chr1	74884213	74884898
chr1	74884965	74886025
chr1	74891528	74891912
chr1	74892432	74894039
chr1	74896591	74897118
chr1	74899721	74900177
chr1	74900409	74901577
chr1	74902777	74903327
chr1	74915693	74916202
chr1	74918259	74918717
chr1	74926734	74927918
chr1	74947288	74947877
chr1	74948070	74949327
chr1	74949575	74952316
chr1	74953503	74954458
chr1	74964053	74965093
chr1	75040372	75040925
chr1	75124454	75125309
chr1	75125666	75126213
chr1	75132761	75133314
chr1	75133666	75134108
chr1	75135411	75136106
chr1	75140859	75142223
chr1	75142269	75143370
chr1	75143725	75144486
chr1	75147299	75148028
chr1	75168053	75169243
chr1	75169511	75169945
chr1	75173581	75174473
chr1	75175786	75176626
chr1	75179302	75180585
chr1	75182341	75182731
chr1	75182846	75183448
chr1	75184237	75184562
chr1	75185011	75185472
chr1	75185811	75187297
chr1	75190754	75191242
chr1	75191331	75192741
chr1	75195730	75196425
chr1	75199869	75200337
chr1	75208929	75209871
chr1	75210366	75211347
chr1	75211459	75212022
chr1	75214393	75214803
chr1	75214933	75215427
chr1	75218050	75220139
chr1	75220753	75221973
chr1	75227627	75228129
chr1	75231237	75232239
chr1	75235957	75237829
chr1	75238171	75239341
chr1	75243520	75243948
chr1	75244135	75245347
chr1	75245853	75246294
chr1	75246504	75246907
chr1	75248126	75248767
chr1	75250555	75251145
chr1	75251346	75252500
chr1	75252622	75254898
chr1	75255070	75255399
chr1	75257844	75258638
chr1	75262888	75263890
chr1	75263944	75264633
chr1	75276940	75277843
chr1	75292522	75293729
chr1	75308629	75309295
chr1	75311635	75312808
chr1	75315032	75315780
chr1	75315940	75316272
chr1	75316364	75318473
chr1	75319604	75320962
chr1	75343926	75344969
chr1	75345079	75345432
chr1	75345548	75346512
chr1	75347401	75347923
chr1	75349076	75350174
chr1	75358615	75359595
chr1	75359743	75361017
chr1	75367326	75368263
chr1	75369500	75370044
chr1	75374256	75376033
chr1	75377429	75378311
chr1	75380617	75381241
chr1	75381336	75383180
chr1	75384044	75385465
chr1	75386953	75390112
chr1	75390642	75391330
chr1	75398785	75400426
chr1	75400979	75401730
chr1	75403606	75404901
chr1	75406160	75407024
chr1	75415285	75415844
chr1	75418237	75418963
chr1	75421492	75422443
chr1	75422543	75422789
chr1	75422881	75423605
chr1	75426711	75427847
chr1	75428927	75429529
chr1	75431053	75431748
chr1	75433814	75434535
chr1	75435642	75436463
chr1	75440948	75442085
chr1	75442222	75442903
chr1	75445328	75445697
chr1	75445798	75446026
chr1	75446592	75448483
chr1	75448760	75449988
chr1	75450084	75450829
chr1	75450927	75451159
chr1	75451291	75451795
chr1	75452245	75452776
chr1	75456735	75457793
chr1	75458144	75458907
chr1	75467017	75468342
chr1	75469093	75469999
chr1	75472118	75473401
chr1	75473892	75474565
chr1	75475067	75475393
chr1	75475544	75476159
chr1	75476306	75476866
chr1	75477122	75478356
chr1	75478750	75480383
chr1	75480621	75481608
chr1	75482520	75483259
chr1	75484161	75484815
chr1	75486796	75488238
chr1	75488384	75489350
chr1	75489417	75489966
chr1	75490655	75491706
chr1	75491735	75493214
chr1	75495042	75496075
chr1	75496409	75496827
chr1	75496988	75497505
chr1	75497941	75498827
chr1	75501756	75502330
chr1	75502900	75503899
chr1	75505135	75506750
chr1	75506976	75507525
chr1	75509359	75510605
chr1	75511263	75512090
chr1	75518026	75518461
chr1	75521104	75522019
chr1	75524510	75525612
chr1	75527019	75527799
chr1	75528742	75529253
chr1	75529632	75530692
chr1	75534221	75534877
chr1	75545412	75545738
chr1	75545849	75546974
chr1	75547203	75548589
chr1	75551105	75551431
chr1	75551513	75551830
chr1	75552722	75553281
chr1	75553359	75554234
chr1	75556554	75558108
chr1	75558456	75559908
chr1	75587758	75589642
chr1	75596786	75597434
chr1	75608592	75609203
chr1	75653618	75654209
chr1	75662714	75663215
chr1	75704872	75705208
chr1	75802127	75802511
chr1	75888235	75888658
chr1	77446413	77447421
chr1	77473318	77473635
chr1	77473997	77474229
chr1	77496715	77497170
chr1	77513253	77513952
chr1	77514041	77514826
chr1	77514906	77516890
chr1	77711394	77712402
chr1	77931950	77932521
chr1	77972205	77972614
chr1	78008762	78009262
chr1	78189290	78190119
chr1	78196416	78197456
chr1	78215733	78218496
chr1	78309982	78311442
chr1	78377574	78378250
chr1	78412439	78412941
chr1	78488135	78489578
chr1	78511518	78512172
chr1	78602005	78602610
chr1	78635284	78636065
chr1	78657214	78658955
chr1	78815094	78815759
chr1	78817542	78818303
chr1	79217368	79217936
chr1	79439756	79440469
chr1	79450283	79450998
chr1	79581125	79581883
chr1	79670319	79670786
chr1	79671394	79672533
chr1	79694622	79695403
chr1	79760798	79761122
chr1	79761181	79762030
chr1	79775777	79776522
chr1	79781374	79782248
chr1	79854225	79854881
chr1	79858116	79859440
chr1	80150478	80151762
chr1	80237032	80237741
chr1	80314531	80315130
chr1	80339258	80341534
chr1	80504910	80505547
chr1	80757697	80759056
chr1	81554135	81555763
chr1	81593318	81594286
chr1	82282810	82283815
chr1	82286939	82287685
chr1	82288371	82288825
chr1	82289210	82292182
chr1	82292783	82293451
chr1	82316034	82317126
chr1	82358847	82359376
chr1	82378807	82379391
chr1	82523045	82523647
chr1	82586476	82587533
chr1	82724713	82725676
chr1	82772422	82773152
chr1	82785700	82786473
chr1	82820188	82820508
chr1	82834361	82834848
chr1	82837423	82837999
chr1	82838574	82840635
chr1	82924583	82925396
chr1	82948684	82949857
chr1	83038023	83038716
chr1	83069981	83070652
chr1	83156724	83157185
chr1	83159592	83160162
chr1	83177918	83178716
chr1	83184677	83185353
chr1	83275639	83276553
chr1	83406585	83407696
chr1	83408045	83408833
chr1	83687720	83688593
chr1	83922538	83923239
chr1	83938095	83938677
chr1	84068324	84069793
chr1	84279895	84280496
chr1	84283229	84283783
chr1	84283880	84285034
chr1	84286526	84287148
chr1	84404724	84405526
chr1	84405740	84406221
chr1	84406929	84407584
chr1	84615454	84615910
chr1	84622849	84623451
chr1	84694568	84696796
chr1	84721988	84722631
chr1	84760364	84761188
chr1	84837487	84840777
chr1	84848471	84849295
chr1	84849976	84850595
chr1	84850766	84851156
chr1	84860591	84861573
chr1	84862347	84862946
chr1	84866306	84868356
chr1	84868719	84870014
chr1	84871512	84871806
chr1	84872040	84872781
chr1	84879578	84880097
chr1	84881353	84882968
chr1	84883029	84883462
chr1	84887265	84888117
chr1	84888580	84889034
chr1	84889129	84890958
chr1	84891061	84891364
chr1	84892734	84893124
chr1	84895789	84896699
chr1	84899522	84900461
chr1	84933594	84934097
chr1	84934213	84935380
chr1	85703400	85703868
chr1	85766315	85766839
chr1	85770714	85771319
chr1	85790413	85790862
chr1	85792951	85794742
chr1	85853371	85854157
chr1	85890772	85891516
chr1	85894237	85894828
chr1	85894953	85895940
chr1	85899326	85899817
chr1	85901011	85901540
chr1	85907427	85908388
chr1	85908721	85909524
chr1	85938816	85939258
chr1	86002368	86003000
chr1	86018175	86019092
chr1	86032225	86033142
chr1	86038318	86038990
chr1	86045829	86046829
chr1	86046915	86047184
chr1	86048014	86049013
chr1	86059376	86060052
chr1	86060277	86061114
chr1	86062552	86063595
chr1	86063720	86065448
chr1	86140924	86141591
chr1	86143337	86144584
chr1	86147269	86148449
chr1	86149093	86149527
chr1	86150654	86151344
chr1	86151677	86152576
chr1	86153904	86155131
chr1	86156202	86156853
chr1	86171563	86172219
chr1	86175299	86175914
chr1	86178464	86178824
chr1	86178894	86179281
chr1	86186597	86187463
chr1	86188693	86189844
chr1	86198612	86199457
chr1	86200974	86201590
chr1	86210508	86211771
chr1	86214214	86214973
chr1	86236247	86237193
chr1	86239494	86240208
chr1	86269971	86270484
chr1	86278247	86278890
chr1	86286509	86286873
chr1	86294304	86295097
chr1	86297412	86297902
chr1	86300624	86301288
chr1	86301436	86302147
chr1	86302914	86304525
chr1	86305070	86305686
chr1	86306317	86306889
chr1	86307758	86308640
chr1	86308713	86310014
chr1	86310503	86311881
chr1	86313367	86314191
chr1	86336318	86337091
chr1	86337658	86338780
chr1	86339010	86340514
chr1	86342261	86342678
chr1	86343967	86344317
chr1	86344930	86345681
chr1	86348188	86348858
chr1	86348922	86349744
chr1	86349855	86350310
chr1	86358489	86360996
chr1	86378866	86379811
chr1	86380872	86381888
chr1	86387190	86388133
chr1	86389113	86390010
chr1	86394808	86395461
chr1	86406516	86407281
chr1	86415487	86416032
chr1	86421054	86421485
chr1	86425087	86425679
chr1	86425778	86426492
chr1	86427022	86428186
chr1	86429263	86430474
chr1	86432437	86433070
chr1	86433927	86435233
chr1	86436365	86437173
chr1	86437846	86438939
chr1	86439553	86441042
chr1	86441506	86444803
chr1	86447762	86448309
chr1	86449950	86450465
chr1	86450580	86451081
chr1	86467067	86467943
chr1	86470516	86471401
chr1	86471425	86471999
chr1	86472082	86473180
chr1	86479558	86480190
chr1	86480621	86481443
chr1	86481586	86482085
chr1	86487025	86488340
chr1	86488716	86489253
chr1	86491738	86492852
chr1	86493690	86494178
chr1	86496765	86497659
chr1	86497690	86498537
chr1	86498611	86499295
chr1	86499571	86500499
chr1	86500953	86501856
chr1	86502204	86502910
chr1	86505412	86506033
chr1	86506111	86507070
chr1	86507290	86508357
chr1	86508827	86510095
chr1	86510223	86510604
chr1	86511204	86511600
chr1	86511709	86512413
chr1	86518708	86519207
chr1	86519361	86519813
chr1	86519889	86520779
chr1	86521642	86521979
chr1	86522048	86523022
chr1	86523827	86524113
chr1	86529595	86529973
chr1	86530848	86531340
chr1	86531509	86533004
chr1	86533184	86534188
chr1	86535235	86536070
chr1	86536304	86536763
chr1	86537642	86538706
chr1	86543310	86544210
chr1	86549459	86550285
chr1	86581735	86583103
chr1	86586519	86587609
chr1	86634557	86635242
chr1	86647488	86648004
chr1	86653042	86653972
chr1	86668685	86669249
chr1	86669538	86670192
chr1	86670276	86670936
chr1	86703256	86704275
chr1	87028591	87029160
chr1	87037175	87038151
chr1	87041140	87041703
chr1	87042066	87042553
chr1	87049287	87049781
chr1	87070627	87071394
chr1	87071516	87071924
chr1	87098108	87099179
chr1	87124477	87125210
chr1	87126963	87128000
chr1	87148462	87148953
chr1	87150493	87150800
chr1	87152016	87152879
chr1	87152976	87153317
chr1	87153441	87157599
chr1	87164229	87164759
chr1	87166201	87166612
chr1	87172171	87173134
chr1	87173602	87173998
chr1	87174113	87174911
chr1	87175586	87176586
chr1	87180614	87181459
chr1	87182734	87183840
chr1	87185503	87188094
chr1	87188192	87188880
chr1	87190444	87191642
chr1	87201629	87202666
chr1	87205257	87205763
chr1	87206158	87207030
chr1	87207190	87208365
chr1	87208865	87209375
chr1	87209908	87210753
chr1	87210955	87211554
chr1	87213193	87214864
chr1	87214936	87215186
chr1	87217800	87218675
chr1	87225803	87226947
chr1	87229888	87230359
chr1	87230580	87231205
chr1	87245946	87246712
chr1	87252160	87253188
chr1	87258427	87258844
chr1	87263852	87265132
chr1	87265282	87265671
chr1	87272243	87272718
chr1	87300612	87301279
chr1	87326390	87327971
chr1	87379902	87380707
chr1	87470138	87470639
chr1	87471775	87472449
chr1	87474857	87475910
chr1	87480170	87481195
chr1	87508900	87510735
chr1	87511911	87512405
chr1	87550781	87551644
chr1	87637453	87637880
chr1	87657842	87658404
chr1	87661544	87662030
chr1	87665827	87666238
chr1	87667736	87669058
chr1	87673669	87674513
chr1	87676085	87676417
chr1	87684448	87685188
chr1	87689724	87690400
chr1	87755802	87756676
chr1	87765542	87766102
chr1	87790088	87790912
chr1	87791748	87792344
chr1	87848499	87849109
chr1	87850612	87851069
chr1	87852867	87854524
chr1	87900820	87901460
chr1	88007852	88008947
chr1	88016867	88017494
chr1	88205180	88206052
chr1	88212239	88212745
chr1	88213614	88214943
chr1	88215964	88216339
chr1	88216592	88216870
chr1	88217062	88217401
chr1	88217459	88217792
chr1	88218028	88218479
chr1	88220340	88220938
chr1	88221041	88221445
chr1	88223098	88223535
chr1	88223599	88224367
chr1	88225347	88226118
chr1	88226433	88227148
chr1	88227536	88228847
chr1	88229090	88230987
chr1	88231370	88232527
chr1	88232787	88233707
chr1	88234425	88235884
chr1	88236643	88237774
chr1	88238530	88239974
chr1	88240040	88242049
chr1	88242333	88243360
chr1	88243914	88244295
chr1	88244343	88244758
chr1	88247842	88248240
chr1	88248300	88249029
chr1	88249141	88251144
chr1	88252064	88252739
chr1	88252811	88254045
chr1	88254645	88256883
chr1	88257110	88258839
chr1	88259248	88261620
chr1	88261765	88263323
chr1	88266088	88266877
chr1	88267034	88268069
chr1	88268108	88268593
chr1	88268706	88270423
chr1	88271301	88272132
chr1	88272505	88273237
chr1	88274712	88275213
chr1	88275548	88276130
chr1	88276273	88278654
chr1	88279191	88279906
chr1	88280027	88280709
chr1	88283159	88284003
chr1	88284099	88285436
chr1	88286361	88287096
chr1	88287724	88288366
chr1	88289543	88289901
chr1	88290057	88290895
chr1	88291065	88291988
chr1	88295705	88296577
chr1	88297925	88298487
chr1	88299833	88301848
chr1	88302047	88302823
chr1	88303694	88304792
chr1	88309097	88309636
chr1	88310407	88311010
chr1	88424739	88425816
chr1	88429526	88430028
chr1	88464020	88465025
chr1	88465594	88466180
chr1	88466632	88467352
chr1	88474087	88475806
chr1	88605489	88606488
chr1	88608270	88608690
chr1	88668297	88669698
chr1	88700489	88700819
chr1	88700926	88702793
chr1	88705671	88706741
chr1	88707349	88707875
chr1	88745292	88745713
chr1	88800484	88801023
chr1	88807046	88807562
chr1	89024878	89026166
chr1	89068906	89071001
chr1	89071206	89071761
chr1	89093619	89094312
chr1	89095755	89096964
chr1	89102234	89102875
chr1	89103979	89104989
chr1	89121776	89122352
chr1	89130605	89131735
chr1	89131791	89132313
chr1	89132995	89134415
chr1	89137063	89137756
chr1	89145242	89145731
chr1	89182829	89183898
chr1	89191103	89192223
chr1	89453994	89455203
chr1	89455462	89456353
chr1	89456840	89457263
chr1	89457626	89458089
chr1	89467709	89468088
chr1	89468466	89469269
chr1	89474705	89475329
chr1	89475544	89475877
chr1	89513411	89514644
chr1	89516273	89517271
chr1	89519050	89519792
chr1	89525022	89526111
chr1	89566215	89566866
chr1	89568517	89569272
chr1	89570212	89570975
chr1	89573933	89574771
chr1	89576718	89577469
chr1	89579873	89581655
chr1	89581749	89582056
chr1	89626938	89627728
chr1	89634087	89634616
chr1	89688954	89689498
chr1	89696541	89697122
chr1	89701633	89702480
chr1	89712911	89713366
chr1	89724656	89725227
chr1	89756376	89756988
chr1	89763789	89764269
chr1	89852604	89853345
chr1	89872661	89873403
chr1	89876018	89877028
chr1	89895425	89895942
chr1	89921800	89922686
chr1	89922749	89923027
chr1	89923214	89924180
chr1	89924902	89925773
chr1	89926018	89926541
chr1	89926680	89927677
chr1	89928645	89929046
chr1	89929746	89931742
chr1	89933760	89934299
chr1	89935465	89936460
chr1	89939305	89939728
chr1	89939916	89940706
chr1	89941595	89942496
chr1	89951134	89951670
chr1	89954359	89954875
chr1	89967623	89968871
chr1	89992069	89993316
chr1	90000954	90001445
chr1	90026720	90027241
chr1	90053429	90054057
chr1	90086551	90087101
chr1	90153146	90153690
chr1	90201106	90201874
chr1	90202123	90203176
chr1	90203701	90204340
chr1	90369237	90369806
chr1	90424101	90424845
chr1	90524593	90525193
chr1	90603073	90603793
chr1	90613682	90614794
chr1	90669371	90669881
chr1	90790026	90790508
chr1	90848675	90849054
chr1	90896733	90897049
chr1	90901534	90902335
chr1	90914655	90915227
chr1	90928011	90929085
chr1	90932857	90933682
chr1	90956645	90957363
chr1	90961215	90961786
chr1	90969236	90969549
chr1	90974884	90975416
chr1	90998525	90999560
chr1	91052318	91054212
chr1	91062839	91063516
chr1	91144777	91145544
chr1	91178977	91179682
chr1	91179791	91180647
chr1	91210746	91211273
chr1	91211998	91212441
chr1	91249605	91251120
chr1	91297814	91298601
chr1	91318957	91319612
chr1	91321599	91322701
chr1	91324890	91325472
chr1	91325873	91327355
chr1	91328238	91329114
chr1	91335777	91336950
chr1	91342192	91342864
chr1	91343801	91344586
chr1	91345100	91345786
chr1	91346396	91347164
chr1	91351189	91351913
chr1	91355969	91356497
chr1	91359011	91359406
chr1	91360060	91360548
chr1	91364594	91365575
chr1	91365736	91367418
chr1	91367527	91367853
chr1	91368661	91369424
chr1	91369855	91370782
chr1	91371088	91371854
chr1	91373087	91373454
chr1	91398004	91399277
chr1	91404912	91405438
chr1	91405808	91406193
chr1	91411631	91413824
[truncated: 93,129 more rows]

## Sheet: Supplementary Table 2b
Chr	Start	End
chr1	3060728	3061515
chr1	3062456	3063116
chr1	3249865	3252051
chr1	3288250	3288933
chr1	3334813	3335888
chr1	3482658	3483611
chr1	3548534	3549572
chr1	3569223	3570155
chr1	3670340	3672702
chr1	3681403	3682018
chr1	3873107	3873617
chr1	3879346	3880081
chr1	3912714	3913500
chr1	3914746	3916030
chr1	3994607	3995157
chr1	3998019	3998617
chr1	4059117	4060061
chr1	4141992	4143054
chr1	4255695	4256543
chr1	4351948	4353477
chr1	4354338	4355123
chr1	4383248	4383941
chr1	4405753	4406913
chr1	4412274	4412844
chr1	4416678	4417158
chr1	4422108	4422833
chr1	4425525	4426180
chr1	4468851	4469558
chr1	4471052	4472006
chr1	4491484	4493923
chr1	4496141	4497367
chr1	4497723	4498350
chr1	4543834	4544629
chr1	4571183	4572428
chr1	4579435	4580078
chr1	4598188	4599080
chr1	4687854	4689395
chr1	4761267	4762521
chr1	4762617	4763261
chr1	4766524	4767158
chr1	4767165	4767834
chr1	4768544	4769687
chr1	4769880	4772276
chr1	4785206	4786365
chr1	4802264	4803784
chr1	4807297	4808217
chr1	4808714	4809170
chr1	4851746	4852938
chr1	4855136	4856625
chr1	4856938	4859136
chr1	4906495	4908017
chr1	4910048	4911010
chr1	4911354	4912429
chr1	4941360	4942047
chr1	4970206	4971339
chr1	5017593	5020414
chr1	5020533	5021061
chr1	5022262	5023915
chr1	5046337	5046892
chr1	5070049	5070897
chr1	5082274	5083900
chr1	5106122	5107501
chr1	5122763	5123208
chr1	5124397	5125886
chr1	5136879	5137512
chr1	5159403	5160340
chr1	5169961	5171158
chr1	5206705	5208068
chr1	5231745	5234120
chr1	5241686	5243502
chr1	5258229	5259179
chr1	5260134	5260991
chr1	5261841	5262463
chr1	5586239	5586933
chr1	5587730	5589595
chr1	5778985	5779877
chr1	5915824	5918090
chr1	6142328	6143603
chr1	6214023	6215761
chr1	6216219	6217055
chr1	6218297	6219229
chr1	6257065	6258016
chr1	6272005	6272509
chr1	6282354	6283180
chr1	6358792	6359802
chr1	6382551	6383217
chr1	6406048	6407290
chr1	6415596	6417527
chr1	6440852	6442579
chr1	6448080	6449469
chr1	6457844	6458570
chr1	6729053	6729600
chr1	6760035	6761644
chr1	6870309	6870887
chr1	6898182	6898645
chr1	6911265	6912044
chr1	6984706	6985621
chr1	6997542	6998873
chr1	7047029	7047951
chr1	7048057	7049318
chr1	7052256	7053018
chr1	7053236	7053765
chr1	7087641	7091177
chr1	7102627	7103249
chr1	7105849	7107425
chr1	7179835	7181031
chr1	7205889	7207607
chr1	7220160	7221233
chr1	7265978	7267033
chr1	7307796	7308598
chr1	7312344	7313073
chr1	7313342	7313897
chr1	7319238	7319844
chr1	7396625	7398754
chr1	7496202	7497263
chr1	7671256	7672352
chr1	7732641	7733233
chr1	7779267	7780028
chr1	7972140	7972919
chr1	8096682	8097560
chr1	8304581	8305470
chr1	8379855	8380865
chr1	8469882	8470768
chr1	8470959	8471640
chr1	8580976	8583403
chr1	8924751	8926059
chr1	8957680	8958573
chr1	9191940	9193048
chr1	9298056	9300318
chr1	9384361	9385569
chr1	9468868	9471042
chr1	9478210	9479146
chr1	9512902	9513741
chr1	9535694	9536825
chr1	9541131	9541689
chr1	9544750	9545749
chr1	9547913	9549829
chr1	9566249	9567185
chr1	9627519	9629194
chr1	9629378	9630533
chr1	9648670	9649134
chr1	9649264	9649579
chr1	9699134	9701623
chr1	9701714	9702705
chr1	9711218	9712025
chr1	9729644	9730490
chr1	9745442	9746160
chr1	9746905	9748875
chr1	9768159	9769240
chr1	9797515	9798835
chr1	9825341	9826263
chr1	9847713	9848930
chr1	9908496	9909734
chr1	9941862	9943518
chr1	9943682	9944697
chr1	9945241	9946049
chr1	9948821	9950458
chr1	9950900	9951683
chr1	9954971	9956277
chr1	9966721	9968470
chr1	9991455	9992461
chr1	10007028	10009660
chr1	10023789	10024659
chr1	10031037	10032140
chr1	10036795	10038475
chr1	10038796	10040600
chr1	10074781	10075664
chr1	10085276	10086283
chr1	10089012	10090020
chr1	10115436	10116993
chr1	10127697	10128466
chr1	10128857	10129719
chr1	10141837	10142742
chr1	10146174	10147672
chr1	10226932	10227569
chr1	10231396	10233850
chr1	10259451	10260097
chr1	10284893	10286058
chr1	10300523	10301465
chr1	10453455	10454553
chr1	10484104	10485008
chr1	10514452	10515109
chr1	10522275	10523232
chr1	10573432	10574051
chr1	10694432	10695682
chr1	10711034	10711588
chr1	10877290	10878675
chr1	10879852	10880765
chr1	10993157	10994723
chr1	11065132	11065952
chr1	11097157	11097757
chr1	11149357	11150169
chr1	11272478	11273497
chr1	11276780	11278596
chr1	11328733	11330937
chr1	11350995	11351535
chr1	11386869	11387705
chr1	11395092	11396727
chr1	11400864	11401596
chr1	11413281	11415088
chr1	11427333	11428023
chr1	11457259	11458368
chr1	11462129	11462955
chr1	11500810	11502374
chr1	11748257	11748969
chr1	12025666	12026306
chr1	12125771	12127082
chr1	12683655	12684805
chr1	12690014	12691293
chr1	12691646	12692793
chr1	12694348	12695408
chr1	12710930	12712041
chr1	12717898	12718937
chr1	12744129	12745565
chr1	12761704	12762732
chr1	12789056	12789932
chr1	12791606	12792381
chr1	12807875	12808933
chr1	12813609	12814731
chr1	12834173	12835072
chr1	12835488	12836364
chr1	12836720	12837633
chr1	12839030	12840307
chr1	12849174	12850033
chr1	12864626	12865687
chr1	12886460	12887320
chr1	12989334	12993623
chr1	13015602	13016720
chr1	13019374	13020121
chr1	13051896	13052658
chr1	13058139	13059232
chr1	13064091	13065122
chr1	13068936	13070094
chr1	13074513	13075502
chr1	13076175	13077188
chr1	13079596	13081569
chr1	13084157	13085852
chr1	13103016	13104554
chr1	13104683	13105766
chr1	13109592	13110486
chr1	13117822	13119163
chr1	13125599	13127510
chr1	13127902	13129330
chr1	13131968	13132604
chr1	13132970	13133972
chr1	13134078	13134917
chr1	13135303	13135790
chr1	13136051	13136709
chr1	13142119	13143552
chr1	13143654	13144466
chr1	13150521	13152249
chr1	13183324	13184622
chr1	13186096	13187726
chr1	13189036	13189989
chr1	13225352	13226669
chr1	13256066	13256889
chr1	13324516	13325286
chr1	13371796	13375126
chr1	13426382	13427355
chr1	13467939	13468615
chr1	13588961	13590590
chr1	13598688	13599571
chr1	13605689	13606249
chr1	13607776	13608732
chr1	13619243	13619830
chr1	13641346	13642402
chr1	13658658	13659369
chr1	13659876	13661777
chr1	13772862	13774142
chr1	13789331	13789690
chr1	13846482	13847313
chr1	14097663	14098305
chr1	14185421	14186791
chr1	14225291	14225913
chr1	14267715	14269248
chr1	14287677	14288734
chr1	14291913	14293259
chr1	14294060	14294927
chr1	14309415	14310304
chr1	14506223	14507692
chr1	14631775	14632680
chr1	14739676	14740568
chr1	14754697	14756410
chr1	14756677	14757614
chr1	14918219	14919037
chr1	14919425	14920248
chr1	14979051	14980612
chr1	15017238	15018802
chr1	15255443	15256349
chr1	15285931	15287702
chr1	15483204	15483903
chr1	15592716	15593756
chr1	15644130	15644661
chr1	15651668	15652850
chr1	15710792	15711452
chr1	15758106	15759287
chr1	15768923	15769504
chr1	15790602	15792694
chr1	15804917	15806762
chr1	15827549	15828438
chr1	15828861	15829792
chr1	15851378	15852272
chr1	15855248	15856088
chr1	15858647	15859378
chr1	15860193	15861579
chr1	15861794	15862489
chr1	15883447	15884205
chr1	15890886	15891904
chr1	15892134	15893091
chr1	15902240	15902929
chr1	16092308	16093807
chr1	16098447	16100466
chr1	16101381	16101825
chr1	16103138	16106860
chr1	16129082	16131004
chr1	16135124	16135875
chr1	16136267	16137168
chr1	16172089	16173318
chr1	16177317	16178152
chr1	16227847	16229333
chr1	16258297	16259347
chr1	16347814	16348803
chr1	16437132	16437668
chr1	16445867	16446766
chr1	16517780	16520479
chr1	16521460	16522244
chr1	16603469	16604815
chr1	16618326	16619857
chr1	16636683	16638201
chr1	16638883	16641177
chr1	16641693	16642565
chr1	16652068	16653859
chr1	16655403	16658051
chr1	16664760	16665862
chr1	16666312	16667224
chr1	16671378	16672162
chr1	16687392	16689267
chr1	16719494	16721779
chr1	16748714	16749678
chr1	16749844	16750458
chr1	16780234	16781230
chr1	16823796	16824623
chr1	16826231	16827036
chr1	17091454	17092781
chr1	17096519	17098276
chr1	17145245	17146087
chr1	17206887	17208467
chr1	17250147	17251426
chr1	17308524	17309591
chr1	17506377	17507213
chr1	17520683	17521505
chr1	17523786	17524490
chr1	17726134	17728302
chr1	17845907	17846980
chr1	17931417	17932270
chr1	18053799	18054501
chr1	18056876	18059067
chr1	18190868	18192122
chr1	18223332	18223980
chr1	18323280	18323990
chr1	18531253	18532362
chr1	18793430	18793927
chr1	19012227	19012811
chr1	19103646	19105082
chr1	19209883	19211210
chr1	19213858	19214514
chr1	19233643	19234340
chr1	19234635	19235612
chr1	19236373	19237569
chr1	19241366	19241731
chr1	19522548	19523456
chr1	20224142	20225128
chr1	20259984	20260778
chr1	20477324	20478374
chr1	20544613	20545859
chr1	20553336	20554761
chr1	20759903	20760613
chr1	20761286	20761946
chr1	20777480	20778185
chr1	20780138	20781415
chr1	20786671	20787507
chr1	20788276	20788940
chr1	20789059	20789818
chr1	20791127	20794415
chr1	20794520	20796015
chr1	20796265	20798315
chr1	20799556	20801640
chr1	20802786	20804169
chr1	20804402	20806350
chr1	20806483	20806978
chr1	20807340	20809411
chr1	20809502	20810454
chr1	20811000	20812687
chr1	20813046	20813623
chr1	20813920	20815680
chr1	20816017	20817835
chr1	20818390	20818988
chr1	20819654	20821005
chr1	20835688	20836548
chr1	20867436	20868587
chr1	20868877	20869562
chr1	20871058	20871564
chr1	20871787	20872344
chr1	20879000	20879877
chr1	20889990	20891915
chr1	20895900	20896828
chr1	20905637	20906768
chr1	20908416	20909315
chr1	20913580	20915290
chr1	20934201	20935991
chr1	20936307	20937242
chr1	20950819	20952374
chr1	20955179	20956401
chr1	20974431	20975109
chr1	20998668	21000194
chr1	21002288	21003105
chr1	21008036	21009074
chr1	21014276	21014943
chr1	21037896	21039486
chr1	21040476	21041435
chr1	21048946	21049709
chr1	21077619	21079896
chr1	21080154	21081102
chr1	21097217	21098237
chr1	21101105	21101852
chr1	21162241	21163339
chr1	21165873	21167106
chr1	21217699	21219261
chr1	21255739	21257436
chr1	21260143	21261172
chr1	21303627	21304940
chr1	21460816	21461294
chr1	21461379	21462041
chr1	21782778	21783499
chr1	21801707	21802275
chr1	21855602	21856178
chr1	21960326	21962775
chr1	21963189	21963848
chr1	22293745	22294502
chr1	22377018	22378442
chr1	22385254	22386042
chr1	22466656	22467648
chr1	22532978	22534355
chr1	22537984	22538508
chr1	22719233	22720251
chr1	22802972	22804751
chr1	22804973	22806850
chr1	22830743	22832003
chr1	22971715	22972585
chr1	23061861	23062441
chr1	23114959	23116380
chr1	23255186	23255697
chr1	23255841	23257623
chr1	23382248	23384180
chr1	23539852	23540878
chr1	23761279	23763520
chr1	23763687	23764136
chr1	23823704	23824626
chr1	23827246	23827711
chr1	23828961	23829906
chr1	23832136	23833009
chr1	23843423	23844280
chr1	23869186	23870102
chr1	23921467	23922655
chr1	23958610	23959139
chr1	23959249	23959848
chr1	24002637	24003298
chr1	24004935	24006029
chr1	24050559	24051042
chr1	24099337	24101578
chr1	24107183	24108013
chr1	24133267	24134282
chr1	24153050	24153783
chr1	24245600	24246404
chr1	24302410	24303148
chr1	24520867	24521602
chr1	24585619	24587875
chr1	24648017	24648736
chr1	24678109	24680047
chr1	24699329	24699896
chr1	24714456	24715635
chr1	24720819	24721512
chr1	24763365	24764101
chr1	25012562	25013385
chr1	25181699	25182531
chr1	25228236	25229136
chr1	25309901	25310628
chr1	25510452	25511038
chr1	25621503	25622069
chr1	25829043	25831526
chr1	25836321	25837150
chr1	25865485	25866070
chr1	25887425	25888861
chr1	26201313	26202226
chr1	26202765	26203579
chr1	26229186	26230218
chr1	26257123	26257676
chr1	26406531	26407804
chr1	26516097	26516821
chr1	26524366	26525660
chr1	26651969	26652747
chr1	26686721	26688667
chr1	26842787	26843473
chr1	26901599	26902751
chr1	27006612	27007562
chr1	27292307	27293169
chr1	27311501	27312210
chr1	27463436	27464331
chr1	27608273	27608968
chr1	27618660	27619641
chr1	27900419	27901463
chr1	28000959	28001607
chr1	28210074	28210932
chr1	28493586	28494329
chr1	28622785	28623385
chr1	28858508	28859532
chr1	29176603	29177379
chr1	29187071	29187934
chr1	29196202	29196981
chr1	29237227	29238457
chr1	29421619	29422602
chr1	29453416	29454635
chr1	29682191	29682970
chr1	29796671	29797269
chr1	30137058	30137655
chr1	30237443	30238526
chr1	30508721	30509852
chr1	30515826	30516534
chr1	30655985	30657128
chr1	30719755	30721042
chr1	30779217	30779891
chr1	30792311	30793359
chr1	30795380	30796096
chr1	30798471	30799556
chr1	30800084	30800562
chr1	30800765	30802519
chr1	30803608	30806293
chr1	30807962	30808721
chr1	30815439	30816337
chr1	30818976	30820224
chr1	30834049	30834578
chr1	30835579	30836279
chr1	30847163	30848838
chr1	30849647	30851186
chr1	30861681	30862364
chr1	30867674	30868232
chr1	30869601	30871024
chr1	30872461	30875326
chr1	30875510	30876661
chr1	30889719	30890402
chr1	30910016	30911106
chr1	30931391	30932974
chr1	30936700	30937397
chr1	30937540	30939079
chr1	30939519	30940365
chr1	30940514	30941092
chr1	30943932	30945576
chr1	30948437	30951018
chr1	31233476	31234883
chr1	31258061	31259919
chr1	31539134	31540085
chr1	31720689	31721283
chr1	31892025	31892892
chr1	32061666	32063312
chr1	32171867	32173303
chr1	32220993	32221627
chr1	32269765	32271197
chr1	32279455	32280566
chr1	32972201	32973129
chr1	33271166	33272353
chr1	33435741	33437021
chr1	33453985	33455017
chr1	33469732	33471722
chr1	33507585	33508593
chr1	33523588	33524545
chr1	33554362	33554898
chr1	33555620	33556685
chr1	33611274	33612090
chr1	33621468	33622327
chr1	33635797	33637332
chr1	33637556	33638467
chr1	33669275	33670953
chr1	33680525	33681612
chr1	33714886	33715393
chr1	33719216	33720899
chr1	33721115	33722854
chr1	33723736	33724841
chr1	33732672	33733471
chr1	33739213	33740432
chr1	33741305	33742319
chr1	33742643	33743217
chr1	33743980	33744656
chr1	33745660	33746355
chr1	33746522	33747497
chr1	33747733	33748406
chr1	33748701	33749758
chr1	33753539	33754631
chr1	33756304	33759041
chr1	33770870	33771520
chr1	33787928	33789109
chr1	33812839	33815469
chr1	33902764	33903322
chr1	33903472	33903913
chr1	33906731	33909387
chr1	33915709	33916371
chr1	33925160	33925680
chr1	33943842	33944277
chr1	33944734	33945368
chr1	33962848	33965394
chr1	33966139	33967162
chr1	33969060	33970073
chr1	34004770	34005389
chr1	34005522	34006616
chr1	34006818	34008208
chr1	34009604	34010296
chr1	34010444	34012402
chr1	34017307	34018303
chr1	34032694	34033428
chr1	34038188	34039195
chr1	34040979	34041780
chr1	34055996	34056929
chr1	34060658	34061482
chr1	34067199	34069227
chr1	34069613	34071144
chr1	34072116	34073096
chr1	34073344	34075450
chr1	34076633	34078492
chr1	34085782	34086613
chr1	34096900	34098120
chr1	34102490	34104442
chr1	34106601	34107661
chr1	34108319	34108984
chr1	34109176	34110761
chr1	34111027	34111498
chr1	34113852	34115494
chr1	34122048	34122558
chr1	34127479	34128278
chr1	34139135	34141406
chr1	34142395	34144031
chr1	34177032	34178927
chr1	34179177	34180346
chr1	34181916	34183206
chr1	34184157	34184870
chr1	34188260	34190433
chr1	34190727	34191902
chr1	34193568	34194218
chr1	34199504	34201554
chr1	34202407	34203079
chr1	34216387	34217977
chr1	34218211	34219187
chr1	34236116	34236990
chr1	34244719	34246238
chr1	34247692	34248592
chr1	34292333	34293813
chr1	34302231	34303141
chr1	34310417	34311457
chr1	34394642	34395613
chr1	34427337	34428365
chr1	34431544	34433411
chr1	34433793	34434452
chr1	34434699	34435309
chr1	34435611	34436805
chr1	34438384	34440727
chr1	34443111	34444649
chr1	34445178	34445709
chr1	34450504	34451629
chr1	34453818	34454730
chr1	34455270	34456584
chr1	34458250	34458897
chr1	34459211	34460575
chr1	34462372	34463386
chr1	34463542	34464068
chr1	34467750	34468884
chr1	34471554	34472355
chr1	34472384	34473748
chr1	34485390	34486431
chr1	34497959	34499264
chr1	34510677	34511543
chr1	34536214	34537852
chr1	34538397	34538985
chr1	34578042	34580330
chr1	34677368	34679060
chr1	34723090	34724283
chr1	34749282	34749845
chr1	34750150	34751081
chr1	34766532	34767573
chr1	34801212	34803220
chr1	34805108	34806749
chr1	34809459	34809836
chr1	34810119	34810811
chr1	34812297	34813026
chr1	34813643	34814830
chr1	34842197	34843714
chr1	34845986	34847084
chr1	34849705	34850300
chr1	34858310	34859378
chr1	34859638	34860815
chr1	34860911	34862073
chr1	34862388	34863475
chr1	34929706	34930863
chr1	35114653	35116131
chr1	35231616	35233478
chr1	35385208	35386004
chr1	35697739	35698539
chr1	35762692	35764037
chr1	35825441	35826130
chr1	35839388	35839806
chr1	35869388	35870358
chr1	35917909	35918561
chr1	35943816	35944735
chr1	35944879	35945738
chr1	36003325	36005163
chr1	36010498	36011499
chr1	36013342	36014627
chr1	36015300	36016052
chr1	36016741	36019384
chr1	36029984	36030645
chr1	36030696	36031495
chr1	36054430	36055336
chr1	36058486	36059444
chr1	36064599	36067070
chr1	36067704	36072438
chr1	36072489	36074193
chr1	36074716	36076330
chr1	36077626	36078417
chr1	36079354	36079861
chr1	36080149	36081551
chr1	36081691	36083100
chr1	36083555	36084808
chr1	36087721	36088962
chr1	36089190	36091649
chr1	36094872	36095897
chr1	36097647	36098809
chr1	36100942	36102909
chr1	36103334	36104843
chr1	36130145	36131371
chr1	36132302	36132819
chr1	36132904	36133562
chr1	36135091	36137440
chr1	36139241	36139828
chr1	36140265	36140685
chr1	36141037	36142232
chr1	36146892	36148149
chr1	36148885	36150037
chr1	36162154	36163156
chr1	36178017	36178582
chr1	36239437	36239935
chr1	36240031	36241019
chr1	36243799	36245647
chr1	36250924	36251864
chr1	36252682	36253423
chr1	36269187	36270074
chr1	36272563	36273622
chr1	36291323	36292404
chr1	36303300	36303992
chr1	36304103	36304795
chr1	36307088	36309032
chr1	36310831	36311478
chr1	36314829	36316288
chr1	36317067	36320527
chr1	36321195	36322609
chr1	36322822	36323794
chr1	36324165	36324706
chr1	36348400	36349172
chr1	36367678	36369797
chr1	36407911	36409533
chr1	36416666	36417460
chr1	36417643	36418485
chr1	36429753	36430745
chr1	36444477	36446062
chr1	36468298	36469151
chr1	36471079	36472014
chr1	36472111	36472941
chr1	36492164	36493027
chr1	36500983	36502340
chr1	36511225	36513583
chr1	36514203	36515245
chr1	36519027	36519677
chr1	36521211	36521787
chr1	36526523	36527515
chr1	36530553	36532662
chr1	36534314	36535178
chr1	36535305	36536166
chr1	36545606	36548004
chr1	36548639	36550465
chr1	36551874	36552452
chr1	36555640	36559398
chr1	36561106	36561606
chr1	36562113	36562801
chr1	36568928	36570797
chr1	36571411	36572095
chr1	36573200	36573968
chr1	36579740	36581263
chr1	36582764	36584958
chr1	36587843	36588288
chr1	36589382	36590269
chr1	36592883	36593761
chr1	36596020	36596634
chr1	36607763	36608985
chr1	36629996	36631163
chr1	36631279	36631907
chr1	36633162	36634464
chr1	36634727	36636115
chr1	36636538	36637130
chr1	36643349	36644810
chr1	36672271	36673634
chr1	36682088	36683716
chr1	36684135	36684610
chr1	36690631	36693282
chr1	36699016	36700782
chr1	36701025	36701637
chr1	36701744	36702469
chr1	36705600	36706706
chr1	36706927	36708530
chr1	36709038	36710534
chr1	36744158	36745266
chr1	36757552	36758290
chr1	36758427	36759343
chr1	36767304	36767952
chr1	36769233	36770370
chr1	36770546	36771529
chr1	36771946	36772397
chr1	36776797	36777357
chr1	36778368	36779574
chr1	36779996	36781494
chr1	36782060	36784037
chr1	36784507	36787071
chr1	36788173	36789100
chr1	36789643	36790268
chr1	36791602	36791989
chr1	36792875	36793651
chr1	36794142	36794664
chr1	36794783	36795798
chr1	36797983	36799122
chr1	36803981	36804918
chr1	36807672	36808642
chr1	36830847	36831980
chr1	36834180	36834570
chr1	36844677	36845682
chr1	36853959	36854560
chr1	36854865	36856084
chr1	36863855	36865600
chr1	36902710	36903315
chr1	36903460	36904033
chr1	36904997	36905714
chr1	36938719	36940520
chr1	36943450	36944200
chr1	36944258	36945331
chr1	36962287	36963464
chr1	36981716	36983225
chr1	36983432	36987783
chr1	36988664	36989109
chr1	37029085	37030182
chr1	37101457	37102310
chr1	37129958	37130432
chr1	37186490	37187434
chr1	37212071	37213521
chr1	37299563	37301072
chr1	37379868	37381124
chr1	37389174	37390295
chr1	37401537	37402774
chr1	37419290	37419786
chr1	37428489	37430839
chr1	37457878	37458733
chr1	37540125	37541730
chr1	37635762	37636248
chr1	37639035	37639795
chr1	37646984	37647646
chr1	37678258	37679145
chr1	37694399	37695213
chr1	37701898	37702649
chr1	37718907	37720319
chr1	37864260	37865631
chr1	37871772	37873004
chr1	37889827	37890792
chr1	37931680	37932233
chr1	37970975	37971791
chr1	37985604	37986863
chr1	37994434	37994978
chr1	37995120	37995935
chr1	37996216	37998975
chr1	38037163	38038002
chr1	38041024	38041709
chr1	38045231	38046286
chr1	38054635	38055631
chr1	38058343	38059185
chr1	38074009	38074948
chr1	38128857	38130324
chr1	38130564	38131480
chr1	38136904	38137797
chr1	38161323	38162267
chr1	38209278	38210366
chr1	38393491	38395368
chr1	38621374	38622275
chr1	38626211	38628164
chr1	38628345	38628868
chr1	38787484	38788193
chr1	38800290	38800900
chr1	38823571	38824478
chr1	38835564	38836924
chr1	38868775	38870222
chr1	38873771	38874399
chr1	38897055	38898360
chr1	38986766	38988186
chr1	39005560	39006852
chr1	39010211	39011311
chr1	39122383	39123253
chr1	39192432	39192801
chr1	39193730	39194936
chr1	39344871	39345877
chr1	39360913	39362791
chr1	39367100	39368626
chr1	39369064	39369637
chr1	39370139	39370860
chr1	39372448	39372960
chr1	39375069	39375727
chr1	39376267	39377217
chr1	39378963	39379778
chr1	39380818	39381526
chr1	39384086	39385520
chr1	39390573	39391462
chr1	39391605	39392607
chr1	39399178	39399851
chr1	39417460	39418862
chr1	39477118	39479113
chr1	39527094	39528045
chr1	39529984	39530849
chr1	39532907	39534361
chr1	39534613	39536552
chr1	39576353	39578063
chr1	39614432	39615370
chr1	39650405	39651595
chr1	39761154	39761723
chr1	39761892	39762570
chr1	39772365	39773006
chr1	39854093	39855126
chr1	39859138	39859674
chr1	39895017	39897232
chr1	39899918	39902458
chr1	39902578	39903372
chr1	39906007	39906391
chr1	39906703	39907319
chr1	39923393	39924366
chr1	39930308	39932371
chr1	39932555	39934045
chr1	39934298	39935365
chr1	39936239	39936850
chr1	39940341	39941159
chr1	39944513	39945457
chr1	39949186	39950610
chr1	39957746	39958402
chr1	39961884	39962917
chr1	39969740	39970345
chr1	39992889	39994263
chr1	40000453	40001334
chr1	40002016	40003037
chr1	40006007	40007123
chr1	40010336	40011443
chr1	40024314	40025223
chr1	40026681	40027788
chr1	40028057	40028753
chr1	40029727	40030542
chr1	40030702	40031642
chr1	40058515	40059508
chr1	40265979	40267278
chr1	40325766	40326450
chr1	40680552	40682679
chr1	40790204	40791083
chr1	41130450	41131889
chr1	41389957	41390846
chr1	41984696	41985377
chr1	42057512	42059102
chr1	42257460	42258269
chr1	42436473	42437102
chr1	42490957	42492321
chr1	42591385	42592335
chr1	42684087	42685087
chr1	42685987	42687198
chr1	42693402	42695249
chr1	42695561	42697023
chr1	42697244	42699273
chr1	42713112	42713964
chr1	42850720	42851908
chr1	42864489	42865825
chr1	42887746	42888877
chr1	42890731	42892198
chr1	42906114	42908157
chr1	42909189	42909991
chr1	42910406	42912661
chr1	42917783	42918873
chr1	42922581	42924361
chr1	42950617	42951211
chr1	42951687	42952304
chr1	42952482	42953893
chr1	43051402	43052174
chr1	43052953	43054037
chr1	43091621	43093119
chr1	43098027	43099311
chr1	43163248	43164869
chr1	43186279	43186847
chr1	43444667	43447356
chr1	43447717	43448431
chr1	43511109	43512202
chr1	43570543	43571604
chr1	43730373	43731252
chr1	43738154	43738967
chr1	43739131	43739970
chr1	43754170	43755329
chr1	43762443	43763436
chr1	43809256	43809748
chr1	43826653	43828573
chr1	43882225	43883383
chr1	43898100	43900048
chr1	43933017	43934798
chr1	43964252	43964783
chr1	43967800	43968739
chr1	43993731	43994412
chr1	44017169	44018105
chr1	44026905	44028586
chr1	44034726	44036543
chr1	44041203	44042611
chr1	44091650	44092514
chr1	44100670	44102855
chr1	44118150	44120583
chr1	44121970	44122801
chr1	44147165	44148563
chr1	44160165	44160903
chr1	44164036	44165161
chr1	44174025	44175328
chr1	44244647	44245370
chr1	44331402	44332263
chr1	44333377	44334519
chr1	44551084	44552837
chr1	44612595	44614052
chr1	44920431	44921783
chr1	45264005	45264959
chr1	45285590	45286709
chr1	45315435	45316350
chr1	45357520	45359506
chr1	45379724	45380511
chr1	45574875	45575658
chr1	45587367	45588417
chr1	45709461	45710008
chr1	45723553	45724410
chr1	45769090	45769868
chr1	45794710	45796365
chr1	45818291	45819360
chr1	45825070	45825604
chr1	45890835	45891803
chr1	45924972	45927341
chr1	46066481	46067304
chr1	46425422	46425898
chr1	46818911	46819519
chr1	46849744	46850573
chr1	46852132	46855077
chr1	46857845	46858736
chr1	46863288	46864033
chr1	46864297	46864872
chr1	46894278	46895046
chr1	46921451	46922003
chr1	46934822	46935972
chr1	46997898	46998527
chr1	47076207	47076965
chr1	47090251	47091112
chr1	47138891	47139801
chr1	47326799	47327381
chr1	47407684	47408753
chr1	47742743	47743532
chr1	47846936	47847983
chr1	47914015	47914586
chr1	47914712	47915707
chr1	48141376	48142272
chr1	48167278	48168445
chr1	48380053	48380775
chr1	48479417	48480727
chr1	48697637	48699291
chr1	48839743	48840867
chr1	48874590	48875800
chr1	49231617	49233211
chr1	49260525	49261524
chr1	49442219	49443342
chr1	49708398	49709375
chr1	49750304	49750976
chr1	49810645	49811530
chr1	49838961	49839641
chr1	49934705	49935152
chr1	49983980	49984648
chr1	50189542	50190048
chr1	50400069	50401493
chr1	50584701	50585675
chr1	50625533	50626188
chr1	50670803	50671773
chr1	50906356	50907189
chr1	50926289	50928580
chr1	51281815	51282761
chr1	51288992	51290833
chr1	51477049	51479098
chr1	51479232	51480421
chr1	51508890	51509600
chr1	51536173	51536860
chr1	51597091	51597705
chr1	51746640	51747987
chr1	51760489	51761710
chr1	51798003	51798979
chr1	51853267	51853984
chr1	51865268	51866906
chr1	51879102	51880217
chr1	51895709	51897016
chr1	51914703	51917058
chr1	51931376	51931924
chr1	52008193	52009396
chr1	52009540	52010082
chr1	52024365	52026139
chr1	52039105	52040551
chr1	52113086	52114306
chr1	52115004	52115901
chr1	52118231	52118888
chr1	52119033	52120226
chr1	52127188	52128010
chr1	52143390	52144045
chr1	52147512	52148510
chr1	52149988	52150391
chr1	52151308	52152088
chr1	52154967	52155984
chr1	52156256	52157055
chr1	52164077	52164944
chr1	52166282	52167273
chr1	52167510	52168437
chr1	52169395	52171763
chr1	52180072	52180640
chr1	52231888	52234275
chr1	52499369	52501074
chr1	52525545	52526347
chr1	52630322	52631593
chr1	52638362	52639857
chr1	52725830	52727751
chr1	52816575	52817974
chr1	52844077	52846076
chr1	52916331	52917105
chr1	52951606	52954342
chr1	52954428	52955498
chr1	52963261	52964266
chr1	52964545	52965178
chr1	53053434	53054126
chr1	53182375	53182937
chr1	53186867	53188629
chr1	53209541	53210442
chr1	53223339	53225011
chr1	53296528	53297881
chr1	53313070	53314096
chr1	53352245	53353035
chr1	53581283	53581940
chr1	53613290	53613857
chr1	53706296	53707137
chr1	53749962	53750506
chr1	53751018	53751586
chr1	53784260	53786131
chr1	53786189	53787170
chr1	53821667	53822650
chr1	53823636	53824760
chr1	53867023	53868135
chr1	53925283	53926169
chr1	54094904	54095820
chr1	54104922	54105833
chr1	54185332	54186014
chr1	54193900	54195401
chr1	54249892	54252189
chr1	54373677	54374626
chr1	54380640	54382143
chr1	54384215	54384715
chr1	54438333	54439415
chr1	54479140	54480265
chr1	54484307	54485601
chr1	54538759	54539489
chr1	54551588	54552308
chr1	54556786	54558498
chr1	54584463	54586329
chr1	54676663	54677507
chr1	54806525	54807521
chr1	54867997	54869203
chr1	54912201	54913046
chr1	54925410	54927224
chr1	54974419	54975409
chr1	54979263	54980658
chr1	54982514	54983885
chr1	54984034	54984770
chr1	54991509	54992481
chr1	55026434	55028102
chr1	55028776	55029949
chr1	55031104	55032283
chr1	55042328	55043754
chr1	55045383	55046314
chr1	55051950	55053722
chr1	55056104	55056834
chr1	55075794	55076192
chr1	55076371	55077507
chr1	55085474	55086174
chr1	55086225	55088692
chr1	55088780	55089814
chr1	55091554	55093412
chr1	55098638	55099268
chr1	55106290	55107757
chr1	55107838	55110439
chr1	55129163	55130431
chr1	55130651	55132094
chr1	55160905	55162518
chr1	55162628	55163311
chr1	55163839	55164419
chr1	55164571	55165646
chr1	55171651	55172675
chr1	55195045	55196247
chr1	55198313	55199392
chr1	55201340	55202897
chr1	55210683	55211552
chr1	55225958	55226887
chr1	55233810	55234952
chr1	55236825	55239123
chr1	55361561	55364076
chr1	55383174	55383777
chr1	55405070	55407242
chr1	55575758	55576657
chr1	55619332	55620354
chr1	55709948	55711410
chr1	55874103	55875541
chr1	55906343	55907121
chr1	56876195	56876793
chr1	56928432	56929068
chr1	56968937	56970538
chr1	56970647	56973997
chr1	56975389	56976029
chr1	56976151	56976767
chr1	56976858	56978695
chr1	56979937	56981629
chr1	56982933	56983435
chr1	56983815	56985176
chr1	57269153	57270479
chr1	57376760	57379309
chr1	57399497	57400143
chr1	57405977	57407467
chr1	57470343	57471067
chr1	57564183	57565004
chr1	57581393	57583008
chr1	57606979	57608194
chr1	57773930	57775839
chr1	57968856	57970397
chr1	57988753	57989942
chr1	57995638	57996766
chr1	58029679	58031201
chr1	58031452	58032314
chr1	58112730	58113244
chr1	58154047	58154876
chr1	58256459	58257485
chr1	58358939	58359980
chr1	58366569	58367972
chr1	58388277	58388973
chr1	58389289	58389921
chr1	58391133	58391598
chr1	58391680	58394222
chr1	58394504	58395169
chr1	58395688	58397586
chr1	58400088	58401122
chr1	58401207	58402377
chr1	58402434	58403658
chr1	58403822	58405250
chr1	58406451	58412152
chr1	58412294	58413473
chr1	58414479	58415607
chr1	58415709	58417002
chr1	58418173	58418684
chr1	58420825	58421366
chr1	58421637	58422120
chr1	58423159	58425389
chr1	58426962	58428688
chr1	58431392	58431973
chr1	58443570	58444375
chr1	58444655	58446660
chr1	58446845	58448120
chr1	58448980	58450180
chr1	58451028	58451752
chr1	58453776	58455290
chr1	58455948	58456856
chr1	58457107	58457562
chr1	58457734	58458978
chr1	58462401	58464324
chr1	58504032	58505424
chr1	58585254	58586862
chr1	58710985	58711964
chr1	58713144	58714088
chr1	58746554	58747498
chr1	58761249	58762036
chr1	58794599	58796431
chr1	58957872	58958438
chr1	58972877	58974381
chr1	59070816	59071819
chr1	59074031	59074844
chr1	59110831	59111494
chr1	59119568	59120751
chr1	59129982	59130956
chr1	59162754	59163583
chr1	59201494	59203248
chr1	59210948	59211904
chr1	59215605	59216051
chr1	59216198	59216797
chr1	59236504	59238224
chr1	59256124	59257083
chr1	59360648	59361746
chr1	59375647	59378111
chr1	59391568	59392854
chr1	59393734	59394289
chr1	59399456	59400320
chr1	59422059	59423928
chr1	59424686	59425374
chr1	59426362	59427639
chr1	59448103	59450094
chr1	59450233	59451039
chr1	59456908	59457510
chr1	59465743	59466666
chr1	59468888	59469998
chr1	59472073	59472914
chr1	59474260	59475413
chr1	59480929	59485756
chr1	59486978	59488401
chr1	59491544	59492792
chr1	59508430	59509133
chr1	59515986	59516711
chr1	59584020	59585402
chr1	59591623	59592830
chr1	59593333	59594195
chr1	59603814	59604523
chr1	59606189	59607607
chr1	59609544	59610845
chr1	59612916	59614924
chr1	59623344	59624094
chr1	59626496	59627715
chr1	59659384	59660101
chr1	59660654	59661643
chr1	59668185	59669083
chr1	59669631	59672126
chr1	59673923	59674711
chr1	59677848	59678659
chr1	59678980	59680110
chr1	59683702	59684271
chr1	59684386	59686767
chr1	59689331	59690206
chr1	59690784	59691850
chr1	59692902	59693472
chr1	59694758	59695747
chr1	59695983	59696670
chr1	59696903	59697313
chr1	59697407	59699206
chr1	59700342	59701573
chr1	59702326	59703961
chr1	59711319	59712076
chr1	59712283	59712716
chr1	59714627	59715232
chr1	59715325	59718594
chr1	59719047	59721614
chr1	59721759	59722460
chr1	59724380	59726709
chr1	59727658	59729459
chr1	59730703	59731198
chr1	59731680	59733804
chr1	59733817	59735613
chr1	59738960	59740394
chr1	59741101	59742066
chr1	59744684	59745213
chr1	59745312	59745710
chr1	59749160	59749702
chr1	59749888	59750457
chr1	59762087	59765328
chr1	59769153	59770231
chr1	59889359	59890149
chr1	59912400	59914231
chr1	59924144	59924935
chr1	59925848	59927292
chr1	59998622	59999210
chr1	60012162	60012798
chr1	60018319	60019366
chr1	60042348	60043748
chr1	60073395	60074085
chr1	60076200	60077000
chr1	60097270	60099127
chr1	60177605	60178701
chr1	60179973	60181487
chr1	60342647	60344275
chr1	60401737	60402827
chr1	60408708	60410286
chr1	60426467	60427228
chr1	60428666	60429257
chr1	60431946	60433013
chr1	60466385	60466997
chr1	60488333	60488745
chr1	60490577	60490920
chr1	60519268	60520441
chr1	60534847	60535636
chr1	60565211	60567725
chr1	60642874	60643563
chr1	60839012	60839456
chr1	60850795	60851596
chr1	60851773	60854574
chr1	60857271	60858275
chr1	60859351	60860623
chr1	60860705	60861666
chr1	60862885	60863676
chr1	60868067	60869489
chr1	60960060	60960992
chr1	60990030	60991782
chr1	61095428	61095959
chr1	61110226	61110734
chr1	61637593	61640255
chr1	61650937	61651886
chr1	62181277	62182076
chr1	62294665	62295515
chr1	62397799	62399129
chr1	62409435	62410759
chr1	62629252	62630399
chr1	62664741	62665656
chr1	62702699	62704203
chr1	62704699	62705451
chr1	62705689	62707274
chr1	62707405	62709048
chr1	62710033	62710933
chr1	62715701	62716408
chr1	62717245	62718340
chr1	62720000	62721175
chr1	62727946	62729346
chr1	62732390	62733505
chr1	62736022	62738801
chr1	62739117	62740819
chr1	62742466	62744423
chr1	62750388	62751002
chr1	62752699	62753774
chr1	62762477	62763169
chr1	62763565	62764440
chr1	62764754	62765871
chr1	62766253	62767407
chr1	62768311	62768764
chr1	62770253	62772789
chr1	62772879	62773554
chr1	62773577	62774684
chr1	62774933	62775339
chr1	62775977	62776892
chr1	62777138	62778278
chr1	62779309	62781204
chr1	62781779	62784780
chr1	62789523	62790182
chr1	62790285	62791026
chr1	62791694	62793367
chr1	62793532	62795246
chr1	62795491	62796084
chr1	62884772	62885653
chr1	62924037	62925054
chr1	62929099	62929918
chr1	62984151	62984918
chr1	63031174	63032662
chr1	63057621	63058203
chr1	63058304	63059428
chr1	63060822	63061556
chr1	63079845	63080633
chr1	63085597	63086319
chr1	63091672	63092899
chr1	63100301	63101136
chr1	63102042	63102781
chr1	63105734	63107203
chr1	63107676	63108209
chr1	63108483	63109167
chr1	63109533	63111671
chr1	63112207	63115011
chr1	63118034	63118902
chr1	63119573	63121662
chr1	63121888	63123144
chr1	63123388	63124758
chr1	63125227	63125838
chr1	63126094	63126732
chr1	63128384	63129683
chr1	63129924	63132394
chr1	63134514	63135162
chr1	63136147	63137344
chr1	63137744	63139229
chr1	63139451	63140542
chr1	63140621	63141407
chr1	63154186	63155316
chr1	63161483	63162479
chr1	63168441	63169209
chr1	63175477	63179062
chr1	63179938	63181888
chr1	63182213	63184080
chr1	63185180	63185652
chr1	63186968	63187959
chr1	63188363	63189380
chr1	63189543	63190384
chr1	63192299	63192958
chr1	63199758	63200942
chr1	63203261	63203708
chr1	63204314	63205245
chr1	63209812	63211085
chr1	63213884	63214417
chr1	63215574	63216241
chr1	63216285	63217253
chr1	63218624	63219747
chr1	63225678	63226284
chr1	63237397	63240102
chr1	63246943	63248643
chr1	63251962	63253676
chr1	63254992	63256124
chr1	63260724	63261517
chr1	63263377	63264301
chr1	63265962	63267533
chr1	63270796	63272597
chr1	63272742	63273947
chr1	63309024	63309984
chr1	63322153	63322827
chr1	63323468	63324765
chr1	63384669	63385287
chr1	63440945	63443070
chr1	63444885	63446910
chr1	63483929	63484882
chr1	63512000	63512593
chr1	63513879	63514560
chr1	63517740	63518387
chr1	63519971	63521057
chr1	63521386	63521987
chr1	63560700	63561293
chr1	63563935	63564707
chr1	63567455	63567924
chr1	63586723	63587580
chr1	63591665	63592224
chr1	63594086	63595797
chr1	63596667	63597814
chr1	63598443	63598772
chr1	63614348	63615067
chr1	63729848	63730966
chr1	64078592	64080040
chr1	64104933	64105603
chr1	64118607	64119221
chr1	64119983	64120662
chr1	64120931	64123207
chr1	64225867	64226830
chr1	64301196	64302176
chr1	64305096	64306358
chr1	64531681	64533899
chr1	64616679	64618054
chr1	64618630	64619573
chr1	64649068	64650262
chr1	64654656	64655743
chr1	64689932	64691994
chr1	64694773	64695501
chr1	64730770	64731901
chr1	64731982	64732689
chr1	64733029	64734156
chr1	64734421	64739459
chr1	64795154	64796382
chr1	64850599	64851527
chr1	64948560	64949853
chr1	64956305	64957329
chr1	65082031	65083220
chr1	65100270	65101104
chr1	65102175	65102688
chr1	65103056	65103929
chr1	65109633	65110670
chr1	65111126	65111897
chr1	65177665	65180102
chr1	65185852	65187441
chr1	65209769	65211042
chr1	65212884	65213917
chr1	65235191	65236100
chr1	65240554	65241148
chr1	65277238	65278265
chr1	65278868	65279932
chr1	65297730	65298500
chr1	65305638	65306273
chr1	65310904	65312311
chr1	65313972	65315842
chr1	65353130	65354632
chr1	65388023	65388977
chr1	65654477	65655185
chr1	65721035	65721774
chr1	65799786	65800798
chr1	66047230	66048090
chr1	66173095	66174331
chr1	66174577	66176376
chr1	66280525	66281583
chr1	66328438	66329359
chr1	66407333	66408255
chr1	66410550	66411299
chr1	66467556	66469040
chr1	66507108	66508205
chr1	66606439	66607377
chr1	66671067	66672045
chr1	66674608	66675180
chr1	66675244	66676404
chr1	66695298	66696024
chr1	66698798	66701936
chr1	66703596	66704204
chr1	66704394	66704900
chr1	66717068	66717802
chr1	66767272	66768790
chr1	66780821	66781531
chr1	66796632	66797314
chr1	66815787	66818390
chr1	66862462	66863643
chr1	66960069	66961524
chr1	67009024	67009313
chr1	67009498	67010315
chr1	67011032	67011612
chr1	67018492	67019675
chr1	67034447	67035042
chr1	67035543	67036701
chr1	67036851	67037599
chr1	67037771	67040115
chr1	67041845	67042420
chr1	67043719	67044615
chr1	67060406	67062070
chr1	67089780	67090304
chr1	67102180	67102810
chr1	67257551	67259428
chr1	67307252	67307998
chr1	67371017	67371759
chr1	67625742	67626731
chr1	67863648	67864450
chr1	67934973	67936576
chr1	67940813	67941291
chr1	67941538	67942152
chr1	68178597	68180137
chr1	68303150	68303963
chr1	68333598	68334616
chr1	68374159	68374884
chr1	68385764	68386137
chr1	68417676	68418655
chr1	68744309	68744955
chr1	68779788	68780661
chr1	68866415	68867657
chr1	69033385	69033982
chr1	69034214	69034722
chr1	69083573	69084221
chr1	69104779	69109662
chr1	69159351	69160258
chr1	69376508	69378712
chr1	69577551	69578248
chr1	69578369	69578885
chr1	69686645	69688037
chr1	69688772	69689618
chr1	69731357	69732313
chr1	69746846	69747442
chr1	69776855	69777772
chr1	69826642	69827428
chr1	69839759	69841178
chr1	69847606	69849212
chr1	69891130	69892308
chr1	70061038	70061887
chr1	70099071	70100183
chr1	70136832	70137735
chr1	70405765	70407427
chr1	70485606	70486414
chr1	70563785	70564883
chr1	70697772	70698532
chr1	70725086	70726623
chr1	70789633	70790259
chr1	70902211	70903139
chr1	70910215	70911195
chr1	70917880	70918730
chr1	70945793	70946563
chr1	71028579	71029435
chr1	71035101	71035910
chr1	71036758	71037732
chr1	71086130	71086857
chr1	71099861	71100751
chr1	71102059	71104546
chr1	71114998	71115468
chr1	71193886	71194659
chr1	71463109	71463865
chr1	71502422	71504316
chr1	71507262	71508451
chr1	71531514	71532121
chr1	71546965	71548124
chr1	71550506	71551350
chr1	71556547	71557967
chr1	71558134	71558778
chr1	71561058	71561997
chr1	71564186	71564996
chr1	71567763	71568314
chr1	71569943	71570855
chr1	71573745	71574535
chr1	71576191	71577022
chr1	71577932	71579116
chr1	71579428	71580030
chr1	71580119	71581506
chr1	71581752	71584355
chr1	71585603	71587681
chr1	71595309	71596016
chr1	71597163	71597867
chr1	71604322	71605497
chr1	71608223	71610331
chr1	71610703	71612173
chr1	71614574	71615337
chr1	71616694	71617649
chr1	71618110	71619898
chr1	71623496	71624518
chr1	71628733	71629846
chr1	71637828	71638722
chr1	71641617	71642288
chr1	71642860	71644503
chr1	71644926	71646686
chr1	71647466	71648694
chr1	71649406	71649928
chr1	71650922	71651198
chr1	71652346	71654724
chr1	71672379	71673017
chr1	71673360	71674267
chr1	71675093	71676043
chr1	71685736	71686400
chr1	71741013	71741818
chr1	72007629	72008378
chr1	72009053	72009963
chr1	72030705	72031597
chr1	72132896	72133730
chr1	72153249	72154313
chr1	72156520	72157640
chr1	72161547	72162376
chr1	72163833	72164378
chr1	72166093	72167893
chr1	72168473	72169362
chr1	72169659	72170461
chr1	72170949	72173130
chr1	72173269	72173719
chr1	72175812	72176526
chr1	72176988	72179458
chr1	72180066	72180352
chr1	72180726	72181085
chr1	72181635	72184232
chr1	72184340	72185499
chr1	72185900	72187286
chr1	72193413	72194661
chr1	72194753	72196793
chr1	72197001	72201380
chr1	72202025	72203867
chr1	72203976	72206187
chr1	72206442	72208068
chr1	72209351	72209935
chr1	72210491	72211311
chr1	72211395	72212895
chr1	72213635	72215373
chr1	72217596	72218173
chr1	72219176	72219910
chr1	72220005	72220602
chr1	72220844	72222258
chr1	72222547	72228487
chr1	72228780	72229674
chr1	72229822	72230775
chr1	72230965	72231474
chr1	72232846	72233614
chr1	72234347	72235935
chr1	72236015	72239365
chr1	72239918	72240853
chr1	72242226	72246759
chr1	72246842	72247467
chr1	72248584	72249471
chr1	72251712	72252240
chr1	72259585	72260352
chr1	72260469	72261035
chr1	72261539	72263415
chr1	72264561	72266650
chr1	72267003	72267516
chr1	72268134	72269045
chr1	72271388	72272547
chr1	72272787	72274502
chr1	72277006	72278397
chr1	72283181	72284982
chr1	72306857	72308506
chr1	72309214	72310719
chr1	72312359	72313791
chr1	72320236	72321242
chr1	72324288	72324931
chr1	72344923	72345753
chr1	72349001	72349766
chr1	72379861	72380468
chr1	72397218	72398209
chr1	72403067	72404269
chr1	72405918	72407110
chr1	72427819	72428238
chr1	72428536	72428955
chr1	72431982	72433175
chr1	72490720	72491230
chr1	72534452	72535178
chr1	72535680	72537537
chr1	72576269	72576973
chr1	72577409	72577939
chr1	72582800	72583927
chr1	72593359	72594055
chr1	72601339	72602536
chr1	72676119	72676889
chr1	72711117	72712552
chr1	72712651	72713358
chr1	72714072	72714408
chr1	72715572	72716429
chr1	72718666	72719494
chr1	72720038	72721303
chr1	72721609	72722924
chr1	72739115	72740334
chr1	72778481	72779750
chr1	72790109	72791345
chr1	72796091	72796869
chr1	72797064	72797836
chr1	72804144	72807038
chr1	72808932	72809626
chr1	72809724	72810330
chr1	72812810	72814484
chr1	72823465	72825770
chr1	72827381	72828705
chr1	72829809	72830101
chr1	72830367	72831173
chr1	72833339	72834362
chr1	72835125	72835915
chr1	72839640	72840375
chr1	72846870	72847596
chr1	72847770	72848381
chr1	72849088	72849949
chr1	72850511	72851288
chr1	72851382	72853020
chr1	72853577	72855185
chr1	72855633	72857902
chr1	72862449	72862894
chr1	72863121	72864333
chr1	72864499	72865474
chr1	72865594	72866054
chr1	72866170	72866759
chr1	72867330	72868238
chr1	72868619	72869663
chr1	72869963	72872419
chr1	72872505	72873043
chr1	72873536	72874663
chr1	72874809	72875418
chr1	72877654	72879072
chr1	72944601	72945438
chr1	72959790	72960855
chr1	72963181	72964149
chr1	73051599	73052873
chr1	73111223	73112068
chr1	73901096	73902360
chr1	73906893	73907922
chr1	73913506	73914210
chr1	73914363	73914927
chr1	73924735	73925813
chr1	73952530	73953960
chr1	73962509	73963035
chr1	73963166	73964708
chr1	73965556	73967331
chr1	73968488	73969454
chr1	73984771	73986746
chr1	73987824	73989671
chr1	73993964	73994686
chr1	73998119	73998855
chr1	73999041	74000748
chr1	74001328	74001961
chr1	74013675	74014943
chr1	74024517	74025571
chr1	74026490	74027188
chr1	74027238	74028443
chr1	74030835	74031864
chr1	74036367	74037398
chr1	74038511	74039800
chr1	74068176	74069226
chr1	74069313	74070483
chr1	74082247	74082819
chr1	74085127	74085568
chr1	74092147	74093290
chr1	74094270	74095453
chr1	74097980	74099401
chr1	74099495	74100526
chr1	74102340	74103271
chr1	74103805	74104585
chr1	74107965	74108582
chr1	74110857	74112194
chr1	74120256	74121617
chr1	74122960	74123677
chr1	74123837	74125745
chr1	74138034	74139133
chr1	74146580	74147398
chr1	74235938	74237526
chr1	74256413	74257650
chr1	74264016	74265493
chr1	74276041	74276787
chr1	74277054	74277399
chr1	74277496	74282099
chr1	74282641	74283411
chr1	74283632	74286900
chr1	74287977	74289948
chr1	74291850	74293056
chr1	74294908	74298566
chr1	74303486	74304740
chr1	74307363	74309142
chr1	74330210	74331321
chr1	74331675	74333692
chr1	74334936	74335440
chr1	74335597	74336024
chr1	74337335	74337952
chr1	74339364	74340998
chr1	74342502	74343949
chr1	74344319	74344898
chr1	74346719	74347224
chr1	74347327	74347947
chr1	74348234	74350322
chr1	74350586	74351109
chr1	74351715	74352326
chr1	74353773	74354133
chr1	74357680	74358649
chr1	74361764	74362298
chr1	74362478	74363578
chr1	74366846	74367593
chr1	74367975	74368700
chr1	74375258	74376120
chr1	74376501	74377332
chr1	74379138	74380293
chr1	74382950	74384194
chr1	74384345	74385344
chr1	74386422	74387452
chr1	74389190	74389991
chr1	74390073	74395644
chr1	74397110	74398761
chr1	74400696	74402652
chr1	74408395	74409556
chr1	74414809	74416282
chr1	74417785	74420240
chr1	74423431	74424136
chr1	74425690	74426667
chr1	74427071	74428483
chr1	74428958	74431035
chr1	74431105	74432900
chr1	74500671	74501397
chr1	74504554	74507473
chr1	74542045	74542970
chr1	74547723	74548348
chr1	74566648	74567367
chr1	74570158	74571729
chr1	74571830	74572435
chr1	74572550	74572993
chr1	74582540	74583091
chr1	74587391	74588665
chr1	74590099	74590551
chr1	74594695	74596133
chr1	74600948	74602151
chr1	74616130	74616858
chr1	74626781	74628898
chr1	74660910	74662761
chr1	74678562	74679375
chr1	74679537	74680305
chr1	74685323	74686385
chr1	74693867	74694777
chr1	74698212	74699310
chr1	74711627	74712557
chr1	74712933	74714849
chr1	74721947	74723109
chr1	74728075	74729000
chr1	74736393	74737813
chr1	74748277	74749434
chr1	74770196	74772802
chr1	74772949	74773671
chr1	74774103	74774877
chr1	74775196	74776439
chr1	74776928	74777240
chr1	74781972	74782520
chr1	74783515	74784760
chr1	74787131	74789183
chr1	74790875	74792650
chr1	74793212	74793696
chr1	74793913	74795497
chr1	74797545	74798685
chr1	74801623	74802180
chr1	74802862	74803937
chr1	74804306	74806005
chr1	74806315	74808766
chr1	74814776	74815928
chr1	74816464	74817565
chr1	74824358	74825665
chr1	74850531	74851954
chr1	74853060	74856905
chr1	74857224	74859066
chr1	74880599	74883742
chr1	74884307	74886145
chr1	74892393	74893956
chr1	74895687	74897132
chr1	74897847	74898550
chr1	74898752	74899601
chr1	74900270	74901353
chr1	74901912	74902783
chr1	74904191	74905398
chr1	74927457	74928793
chr1	74945457	74947011
chr1	74947567	74950061
chr1	74950161	74952681
chr1	75123991	75126302
chr1	75129124	75130413
chr1	75132466	75134287
chr1	75136026	75136930
chr1	75140813	75143584
chr1	75143827	75144967
chr1	75145868	75146326
chr1	75146597	75147210
chr1	75167990	75170101
[truncated: 123,312 more rows]

## Sheet: Supplementary Table 2c
Chr	Start	End
chr1	3482837	3483307
chr1	3670287	3672702
chr1	4142541	4143129
chr1	4352212	4352762
chr1	4491377	4493872
chr1	4496426	4496807
chr1	4496994	4497732
chr1	4571251	4572181
chr1	4768861	4769596
chr1	4769950	4770525
chr1	4785296	4786146
chr1	4802460	4802869
chr1	4803046	4803432
chr1	4807423	4808356
chr1	4855252	4856285
chr1	4857372	4858651
chr1	4907732	4908259
chr1	4970067	4970959
chr1	5017766	5020133
chr1	5020260	5020581
chr1	5020655	5021628
chr1	5022833	5023893
chr1	5070192	5070628
chr1	5082784	5083651
chr1	5106319	5106957
chr1	5170240	5170565
chr1	5170707	5171162
chr1	5232822	5233380
chr1	5261806	5262132
chr1	5587979	5589035
chr1	5915253	5915879
chr1	5915992	5917538
chr1	6214004	6215536
chr1	6358787	6359792
chr1	6382753	6383203
chr1	6448776	6449480
chr1	6870226	6870830
chr1	7047302	7047864
chr1	7053227	7053841
chr1	7087816	7088264
chr1	7088445	7090059
chr1	7206027	7206542
chr1	7266257	7266789
chr1	7307867	7308371
chr1	7312041	7312981
chr1	7396779	7398655
chr1	7671279	7672327
chr1	7732609	7733376
chr1	7779461	7780007
chr1	8925352	8926045
chr1	9298445	9299074
chr1	9299138	9300339
chr1	9469269	9470453
chr1	9544756	9545737
chr1	9547942	9549071
chr1	9627222	9627961
chr1	9629869	9630584
chr1	9649225	9649739
chr1	9699434	9701177
chr1	9701687	9702392
chr1	9747406	9747740
chr1	9747813	9748878
chr1	9797714	9798792
chr1	9848104	9849120
chr1	9908411	9909521
chr1	9943687	9944601
chr1	9966713	9968518
chr1	9991014	9991527
chr1	10008950	10009527
chr1	10031378	10032323
chr1	10037263	10038422
chr1	10038674	10040458
chr1	10231513	10233735
chr1	10284649	10285575
chr1	10880239	10880678
chr1	10993387	10994030
chr1	11277717	11278357
chr1	11330066	11330538
chr1	11395385	11396289
chr1	11400869	11401610
chr1	11413623	11414992
chr1	12690658	12691296
chr1	12691787	12692761
chr1	12711263	12712022
chr1	12717948	12718456
chr1	12718592	12718796
chr1	12744467	12745535
chr1	12807852	12808425
chr1	12808609	12809090
chr1	12835992	12836378
chr1	12864916	12865507
chr1	12865635	12865963
chr1	12989509	12991577
chr1	12991972	12993571
chr1	13069355	13069955
chr1	13074503	13075075
chr1	13080652	13081489
chr1	13083803	13084344
chr1	13084455	13086020
chr1	13103162	13104585
chr1	13124375	13126096
chr1	13126475	13126806
chr1	13127028	13128666
chr1	13133196	13133972
chr1	13134078	13134678
chr1	13142102	13142824
chr1	13151219	13152307
chr1	13372047	13374950
chr1	13426359	13427222
chr1	13589096	13590486
chr1	13619388	13619817
chr1	13659116	13661425
chr1	13789313	13789970
chr1	14292082	14292739
chr1	14309453	14310463
chr1	14506198	14507718
chr1	14631728	14632279
chr1	14739676	14740077
chr1	14740151	14740575
chr1	14754974	14757431
chr1	14918730	14919046
chr1	15017572	15018244
chr1	15285947	15287406
chr1	15758165	15759508
chr1	15791177	15791514
chr1	15791632	15792202
chr1	15805293	15806496
chr1	15851827	15852944
chr1	15858568	15859098
chr1	15892128	15893112
chr1	15902418	15902874
chr1	16092718	16094052
chr1	16103851	16106708
chr1	16129459	16130759
chr1	16518322	16519613
chr1	16519692	16520170
chr1	16603545	16604470
chr1	16618555	16619828
chr1	16656205	16657706
chr1	16664696	16665968
chr1	16749230	16750169
chr1	17091749	17092341
chr1	17096600	17098268
chr1	17145162	17145868
chr1	17207404	17208086
chr1	17250602	17251296
chr1	17520470	17521566
chr1	17727035	17727890
chr1	18057602	18058911
chr1	18531584	18532221
chr1	19103698	19104136
chr1	19104376	19104962
chr1	19209746	19210636
chr1	19213949	19214484
chr1	19233777	19234302
chr1	19234851	19235166
chr1	19236218	19237204
chr1	19241367	19241716
chr1	20788409	20788925
chr1	20792825	20793535
chr1	20804986	20806076
chr1	20811652	20812305
chr1	20819845	20820725
chr1	20867417	20867952
chr1	20868253	20868640
chr1	20890318	20891162
chr1	20891513	20891779
chr1	20935297	20935725
chr1	20951066	20952240
chr1	21002484	21003112
chr1	21014430	21015117
chr1	21078611	21079891
chr1	21166187	21166862
chr1	21218413	21218990
chr1	21255538	21257205
chr1	21960528	21962747
chr1	22293987	22294308
chr1	22533055	22534326
chr1	22804969	22806459
chr1	23061853	23062442
chr1	23255804	23257078
chr1	23382541	23383713
chr1	23760736	23761301
chr1	23761393	23763600
chr1	23826798	23827552
chr1	23921507	23922683
chr1	24005419	24005827
chr1	24099429	24100856
chr1	24245827	24246405
chr1	24585848	24587705
chr1	24678234	24679299
chr1	25012604	25013293
chr1	25181962	25182493
chr1	25228548	25229055
chr1	25829697	25831036
chr1	26229480	26230066
chr1	26524511	26525558
chr1	26686845	26687778
chr1	26687970	26688338
chr1	30719622	30720024
chr1	30795455	30795952
chr1	30801634	30802290
chr1	30804649	30805092
chr1	30807891	30808345
chr1	30867761	30868164
chr1	30872724	30874569
chr1	30874629	30875155
chr1	30875864	30876503
chr1	30937519	30938335
chr1	30948421	30950424
chr1	31233484	31234054
chr1	32172056	32173314
chr1	32972206	32972780
chr1	33555450	33556795
chr1	33635895	33637164
chr1	33637565	33638424
chr1	33669326	33670876
chr1	33680491	33681346
chr1	33714848	33715280
chr1	33719454	33720579
chr1	33721786	33722805
chr1	33732899	33733404
chr1	33739269	33739632
chr1	33741254	33742205
chr1	33742603	33743302
chr1	33745620	33746303
chr1	33746820	33747472
chr1	33747882	33748562
chr1	33748862	33749404
chr1	33757094	33758142
chr1	33812765	33813759
chr1	33814020	33814854
chr1	33903527	33903854
chr1	33907309	33908376
chr1	33909114	33909760
chr1	33944829	33945485
chr1	33963185	33964026
chr1	34005629	34006171
chr1	34006228	34008194
chr1	34011041	34012243
chr1	34017500	34017892
chr1	34041139	34041706
chr1	34067638	34068191
chr1	34073485	34074447
chr1	34074453	34075374
chr1	34076917	34077888
chr1	34103290	34104437
chr1	34106869	34107514
chr1	34109980	34110574
chr1	34127751	34128183
chr1	34139053	34139975
chr1	34140150	34140587
chr1	34140648	34141130
chr1	34199865	34200923
chr1	34218174	34218638
chr1	34235978	34236942
chr1	34432758	34433681
chr1	34434652	34435383
chr1	34439078	34440265
chr1	34443487	34444590
chr1	34459347	34460613
chr1	34462207	34463321
chr1	34467987	34468794
chr1	34471802	34472351
chr1	34472698	34474101
chr1	34485659	34486297
chr1	34511042	34511305
chr1	34536497	34537631
chr1	34579248	34580040
chr1	34677257	34678424
chr1	34750339	34751203
chr1	34801606	34802443
chr1	34805885	34806709
chr1	34809518	34810795
chr1	34842401	34843385
chr1	34849759	34850273
chr1	34861382	34862054
chr1	34929894	34930310
chr1	34930499	34930912
chr1	35231990	35233009
chr1	35697702	35698353
chr1	35762978	35763771
chr1	35869263	35870353
chr1	35943853	35945248
chr1	36013607	36014597
chr1	36016793	36017648
chr1	36018159	36019384
chr1	36054618	36055609
chr1	36064358	36065447
chr1	36066029	36066574
chr1	36067686	36070041
chr1	36070159	36071061
chr1	36074642	36075736
chr1	36080511	36080934
chr1	36081009	36081332
chr1	36089539	36089937
chr1	36090650	36091047
chr1	36095743	36096300
chr1	36103396	36104815
chr1	36138970	36139857
chr1	36149343	36149854
chr1	36239299	36240583
chr1	36243764	36244647
chr1	36251337	36251756
chr1	36268823	36269952
chr1	36303736	36304154
chr1	36307354	36308290
chr1	36308571	36308871
chr1	36314301	36315307
chr1	36315481	36316499
chr1	36319766	36320351
chr1	36320808	36321789
chr1	36322791	36323841
chr1	36367757	36369792
chr1	36408851	36409494
chr1	36444564	36445720
chr1	36470948	36472905
chr1	36500218	36500998
chr1	36501110	36501551
chr1	36511320	36513173
chr1	36520812	36521830
chr1	36526487	36527210
chr1	36530676	36531417
chr1	36531485	36532582
chr1	36534646	36535784
chr1	36536112	36536408
chr1	36546200	36548567
chr1	36551558	36552542
chr1	36555687	36556164
chr1	36556273	36558620
chr1	36560599	36561986
chr1	36570292	36570930
chr1	36579717	36581110
chr1	36582735	36583882
chr1	36589140	36590867
chr1	36632722	36634304
chr1	36673047	36673512
chr1	36682533	36683667
chr1	36683946	36684569
chr1	36690808	36692373
chr1	36699404	36700186
chr1	36702140	36702919
chr1	36706882	36707388
chr1	36707637	36708191
chr1	36709272	36710643
chr1	36743907	36744925
chr1	36758595	36759209
chr1	36770505	36771645
chr1	36772102	36772563
chr1	36778130	36778526
chr1	36778759	36779534
chr1	36780559	36780897
chr1	36781019	36781919
chr1	36782147	36782617
chr1	36782857	36784092
chr1	36784594	36785746
chr1	36785842	36786768
chr1	36794249	36795103
chr1	36798065	36799010
chr1	36807742	36808186
chr1	36844972	36845540
chr1	36853855	36854621
chr1	36864515	36865151
chr1	36903024	36904445
chr1	36905082	36905607
chr1	36938764	36940490
chr1	36982129	36983225
chr1	36983580	36984100
chr1	36984278	36984835
chr1	36985429	36986316
chr1	36986651	36987217
chr1	36987498	36987835
chr1	36988089	36988971
chr1	37029012	37029788
chr1	37101621	37102249
chr1	37129791	37130377
chr1	37186633	37187498
chr1	37299517	37300609
chr1	37401666	37403027
chr1	37429362	37430967
chr1	37540346	37541697
chr1	37694319	37694814
chr1	37702091	37702567
chr1	37719245	37720305
chr1	37864391	37865625
chr1	37871744	37872803
chr1	37890083	37890782
chr1	37931764	37932166
chr1	37970614	37971395
chr1	37985623	37986725
chr1	37996216	37997663
chr1	37997723	37998724
chr1	38058348	38059040
chr1	38128864	38130564
chr1	38131213	38131590
chr1	38209992	38210550
chr1	38394379	38395227
chr1	38626423	38628140
chr1	38628436	38628698
chr1	38823777	38824480
chr1	38835579	38836787
chr1	38897239	38897699
chr1	38897767	38898293
chr1	38986979	38988243
chr1	39010636	39011052
chr1	39122492	39123131
chr1	39192270	39194739
chr1	39367587	39368583
chr1	39376264	39377459
chr1	39384250	39385288
chr1	39390808	39391518
chr1	39477724	39479153
chr1	39527379	39527892
chr1	39530250	39530957
chr1	39532511	39533171
chr1	39533445	39534353
chr1	39535396	39536397
chr1	39576282	39577933
chr1	39649965	39650986
chr1	39651090	39651430
chr1	39761961	39762536
chr1	39772023	39772992
chr1	39859211	39860179
chr1	39899973	39901669
chr1	39902692	39903385
chr1	39905920	39906468
chr1	39906933	39907766
chr1	39933450	39934705
chr1	39949846	39950579
chr1	39993864	39994583
chr1	40000499	40001052
chr1	40002081	40002663
chr1	40058479	40059541
chr1	40266465	40267014
chr1	40325844	40326396
chr1	40680921	40682138
chr1	40790361	40791096
chr1	41131345	41131864
chr1	42058258	42058855
chr1	42591719	42592299
chr1	42684243	42685254
chr1	42686157	42687102
chr1	42693897	42694330
chr1	42694444	42695260
chr1	42695575	42696198
chr1	42696399	42697018
chr1	42697297	42698904
chr1	42713211	42713622
chr1	42713707	42714069
chr1	42850951	42851725
chr1	42909245	42909888
chr1	42952515	42953725
chr1	43051407	43052335
chr1	43091836	43093229
chr1	43098305	43099199
chr1	43163079	43163504
chr1	43163589	43164404
chr1	43445037	43446912
chr1	43571055	43571575
chr1	43730461	43731030
chr1	43754833	43755343
chr1	43826624	43828205
chr1	43882742	43883351
chr1	43897602	43898362
chr1	43933441	43934716
chr1	44034864	44035805
chr1	44101624	44102819
chr1	44118339	44120696
chr1	44147517	44148420
chr1	44551346	44552781
chr1	45794830	45795944
chr1	45925060	45925861
chr1	45926031	45926642
chr1	46066589	46067193
chr1	46425407	46425865
chr1	46852527	46854330
chr1	46894186	46895071
chr1	47076432	47077049
chr1	47914350	47915285
chr1	48379978	48380604
chr1	48480031	48480502
chr1	50671327	50671891
chr1	50926198	50928317
chr1	51288994	51289991
chr1	51477316	51479001
chr1	51509012	51509425
chr1	51747442	51747950
chr1	51878966	51879836
chr1	51914808	51916278
chr1	51931554	51931985
chr1	52008360	52008989
chr1	52009107	52009380
chr1	52113451	52114077
chr1	52118950	52120159
chr1	52149978	52150370
chr1	52170064	52170363
chr1	52170972	52171685
chr1	52231964	52233876
chr1	52499624	52501101
chr1	52630406	52631348
chr1	52726262	52727838
chr1	52816997	52818093
chr1	52844508	52845628
chr1	52952215	52954115
chr1	52954148	52955427
chr1	52964513	52965020
chr1	53296573	53297561
chr1	53313273	53314014
chr1	53352285	53352924
chr1	53581229	53581987
chr1	53613268	53613840
chr1	53706298	53707077
chr1	53784540	53785602
chr1	53823768	53824072
chr1	53925267	53926023
chr1	54194181	54195373
chr1	54250276	54251228
chr1	54380775	54382025
chr1	54438331	54439250
chr1	54484762	54485322
chr1	54556972	54558264
chr1	54584352	54585816
chr1	54925492	54927063
chr1	54979452	54980457
chr1	55026762	55027873
chr1	55052071	55053508
chr1	55086875	55088687
chr1	55088776	55089191
chr1	55091904	55092250
chr1	55107031	55107806
chr1	55108151	55109467
chr1	55130818	55132006
chr1	55163781	55164490
chr1	55171838	55172273
chr1	55195514	55196109
chr1	55198552	55199356
chr1	55210323	55211511
chr1	55234489	55235460
chr1	55236832	55237974
chr1	55362261	55364233
chr1	55405409	55407469
chr1	55575778	55576565
chr1	55874179	55875076
chr1	56969283	56970331
chr1	56970621	56971270
chr1	56971360	56971787
chr1	56971996	56973974
chr1	56976365	56977002
chr1	56977156	56978580
chr1	56982284	56983382
chr1	57377184	57378466
chr1	57406059	57407532
chr1	57774102	57775877
chr1	57969512	57970440
chr1	57995618	57996187
chr1	57996276	57996736
chr1	58029228	58030518
chr1	58154284	58155095
chr1	58359403	58359879
chr1	58366537	58367481
chr1	58392422	58394111
chr1	58408127	58408626
chr1	58410575	58411128
chr1	58423010	58424490
chr1	58424650	58425630
chr1	58444476	58446174
chr1	58448362	58449246
chr1	58504101	58505246
chr1	58585548	58586876
chr1	58711397	58711899
chr1	58713285	58713777
chr1	58795370	58796299
chr1	58972719	58974386
chr1	59070708	59071641
chr1	59119518	59120651
chr1	59129978	59130580
chr1	59162618	59163311
chr1	59236617	59237753
chr1	59256517	59257294
chr1	59375859	59376993
chr1	59377176	59377715
chr1	59422418	59423904
chr1	59426954	59427454
chr1	59448219	59449881
chr1	59450526	59451316
chr1	59481196	59484076
chr1	59484935	59485367
chr1	59487615	59488045
chr1	59515744	59516933
chr1	59584655	59585002
chr1	59603803	59604420
chr1	59606391	59607457
chr1	59613584	59614079
chr1	59614419	59614910
chr1	59623389	59623907
chr1	59669963	59671448
chr1	59684570	59686075
chr1	59696864	59697396
chr1	59697852	59698378
chr1	59715461	59716113
chr1	59717469	59718378
chr1	59720680	59721610
chr1	59721934	59722309
chr1	59722376	59722802
chr1	59725519	59726119
chr1	59728594	59728865
chr1	59729076	59729451
chr1	59762117	59764250
chr1	59764351	59765060
chr1	59912281	59914303
chr1	59925863	59927624
chr1	60042305	60043527
chr1	60097384	60098785
chr1	60180031	60181349
chr1	60342956	60343989
chr1	60408956	60410378
chr1	60432543	60432970
chr1	60565221	60565733
chr1	60565927	60567530
chr1	60839257	60839554
chr1	60850906	60851508
chr1	60852624	60854421
chr1	60857473	60858315
chr1	61638488	61639492
chr1	61639565	61640085
chr1	62181418	62182297
chr1	62397671	62398798
chr1	62664830	62665309
chr1	62665396	62665809
chr1	62702637	62703960
chr1	62704691	62705459
chr1	62705781	62707190
chr1	62707405	62708335
chr1	62708438	62708776
chr1	62710106	62710556
chr1	62735962	62736444
chr1	62736696	62737186
chr1	62737904	62738677
chr1	62741907	62742935
chr1	62743048	62743903
chr1	62762540	62763261
chr1	62765403	62765841
chr1	62766212	62766557
chr1	62766667	62767190
chr1	62771649	62772785
chr1	62773366	62774112
chr1	62775984	62776669
chr1	62778698	62779444
chr1	62781856	62782988
chr1	62783110	62785335
chr1	62794030	62794922
chr1	62795377	62796096
chr1	62984379	62984977
chr1	63031201	63031662
chr1	63032057	63032767
chr1	63058522	63059084
chr1	63092051	63092529
chr1	63107669	63108216
chr1	63109966	63110399
chr1	63110599	63110812
chr1	63110986	63111135
chr1	63112944	63114362
chr1	63114435	63114799
chr1	63118135	63119043
chr1	63123968	63124508
chr1	63125160	63126117
chr1	63130051	63130841
chr1	63131364	63132102
chr1	63138044	63139535
chr1	63139698	63140542
chr1	63176114	63177961
chr1	63178052	63178638
chr1	63179902	63180991
chr1	63181049	63181866
chr1	63182265	63182508
chr1	63183654	63183934
chr1	63200033	63200795
chr1	63204131	63204748
chr1	63210025	63210731
chr1	63213378	63214341
chr1	63225930	63226239
chr1	63239321	63239930
chr1	63247043	63247367
chr1	63248002	63249278
chr1	63252295	63253353
chr1	63272726	63274043
chr1	63309466	63309861
chr1	63322241	63322730
chr1	63323424	63324142
chr1	63441035	63441581
chr1	63442261	63442794
chr1	63445188	63446922
chr1	63614237	63614860
chr1	64120411	64120922
chr1	64121033	64122580
chr1	64225925	64226626
chr1	64301165	64302224
chr1	64305087	64305993
chr1	64531803	64534120
chr1	64616687	64618061
chr1	64689886	64692030
chr1	64694710	64695499
chr1	64731316	64731887
chr1	64732151	64733341
chr1	64733431	64733824
chr1	64733887	64734326
chr1	64734663	64739255
chr1	64956383	64957118
chr1	65109800	65110482
chr1	65177992	65179675
chr1	65185255	65185885
chr1	65186330	65187228
chr1	65311105	65311939
chr1	65388273	65389146
chr1	66174564	66175807
chr1	66407487	66407992
chr1	66467823	66468981
chr1	66606478	66607015
chr1	66700075	66700455
chr1	66700515	66701462
chr1	66704403	66704841
chr1	66816465	66816739
chr1	66816911	66818243
chr1	66862545	66863484
chr1	67038414	67039016
chr1	67307616	67308103
chr1	69105654	69106703
chr1	69106854	69108373
chr1	69108492	69108898
chr1	69376609	69378608
chr1	69687004	69688015
chr1	69776992	69777487
chr1	69826691	69827370
chr1	70725489	70726141
chr1	71035456	71035894
chr1	71099786	71100480
chr1	71102143	71103449
chr1	71507233	71507933
chr1	71531605	71532143
chr1	71556576	71557748
chr1	71576307	71577161
chr1	71586935	71587860
chr1	71609165	71609924
chr1	71610904	71611463
chr1	71629312	71630101
chr1	71643210	71643996
chr1	71644919	71645887
chr1	71646074	71646499
chr1	71650627	71651211
chr1	71652503	71654276
chr1	71673361	71674477
chr1	72132724	72133376
chr1	72153168	72154679
chr1	72161655	72162445
chr1	72163667	72164661
chr1	72166549	72167297
chr1	72170901	72172026
chr1	72172808	72173111
chr1	72173716	72174204
chr1	72178801	72179383
chr1	72179694	72180589
chr1	72182968	72183554
chr1	72183619	72184281
chr1	72184340	72185494
chr1	72185649	72187068
chr1	72193312	72194477
chr1	72194912	72195855
chr1	72195873	72196731
chr1	72197042	72197518
chr1	72199392	72199882
chr1	72202228	72202775
chr1	72203175	72203381
chr1	72204854	72205995
chr1	72207117	72207738
chr1	72210777	72211167
chr1	72211486	72213094
chr1	72213643	72214961
chr1	72216636	72217881
chr1	72219228	72219604
chr1	72220000	72220590
chr1	72220725	72221527
chr1	72221646	72222257
chr1	72222475	72222926
chr1	72223801	72224464
chr1	72224545	72224964
chr1	72225131	72226234
chr1	72226321	72227502
chr1	72227597	72228391
chr1	72229000	72229440
chr1	72229987	72230578
chr1	72232832	72233381
chr1	72236070	72236940
chr1	72237271	72237924
chr1	72238127	72238753
chr1	72242407	72243474
chr1	72243656	72245149
chr1	72246038	72246591
chr1	72251437	72252073
chr1	72259630	72260166
chr1	72262013	72262742
chr1	72262985	72263526
chr1	72272794	72273532
chr1	72283917	72284614
chr1	72307029	72307817
chr1	72312289	72312600
chr1	72313123	72313738
chr1	72428406	72428945
chr1	72490707	72491323
chr1	72534414	72535441
chr1	72535808	72537535
chr1	72582758	72583750
chr1	72593430	72593872
chr1	72601320	72602297
chr1	72711214	72711996
chr1	72712583	72713316
chr1	72718250	72719578
chr1	72720446	72720756
chr1	72720959	72721371
chr1	72739266	72739907
chr1	72805612	72806664
chr1	72812798	72813235
chr1	72823702	72825091
chr1	72825311	72825629
chr1	72827754	72828343
chr1	72852385	72852851
chr1	72854014	72854586
chr1	72854827	72855196
chr1	72856263	72857186
chr1	72862293	72862559
chr1	72862696	72863467
chr1	72864283	72865302
chr1	72865597	72866237
chr1	72870904	72871349
chr1	72872566	72872841
chr1	72873484	72875509
chr1	72960107	72960916
chr1	72963169	72964202
chr1	73901124	73901971
chr1	73962533	73963392
chr1	73966290	73967438
chr1	74024817	74025582
chr1	74027476	74028365
chr1	74036298	74037567
chr1	74068191	74069098
chr1	74069191	74069857
chr1	74082288	74083269
chr1	74092366	74092626
chr1	74092710	74093203
chr1	74094492	74094876
chr1	74094947	74095184
chr1	74095434	74096198
chr1	74097970	74099285
chr1	74099808	74100325
chr1	74102866	74104518
chr1	74110852	74111998
chr1	74123062	74123644
chr1	74124088	74124977
chr1	74125218	74125680
chr1	74147277	74147947
chr1	74235939	74237730
chr1	74256877	74257321
chr1	74264242	74264986
chr1	74277054	74278330
chr1	74278465	74278844
chr1	74279085	74279768
chr1	74279940	74281706
chr1	74281839	74282404
chr1	74284123	74285895
chr1	74286513	74287227
chr1	74288542	74289254
chr1	74292156	74292854
chr1	74294783	74296423
chr1	74296501	74297047
chr1	74297117	74297769
chr1	74303504	74304637
chr1	74307466	74308669
chr1	74332232	74332900
chr1	74333056	74333445
chr1	74335094	74335572
chr1	74347225	74347573
chr1	74347691	74348016
chr1	74351783	74352864
chr1	74361839	74362242
chr1	74362678	74363544
chr1	74366087	74367267
chr1	74367567	74368661
chr1	74384461	74384821
chr1	74384889	74385530
chr1	74386636	74387439
chr1	74389549	74390004
chr1	74390123	74390283
chr1	74390941	74393354
chr1	74394710	74395359
chr1	74397228	74398510
chr1	74408544	74409849
chr1	74414908	74415305
chr1	74415831	74416183
chr1	74420149	74420955
chr1	74423514	74424096
chr1	74424815	74426274
chr1	74427311	74428358
chr1	74432321	74432854
chr1	74505136	74507262
chr1	74542591	74543270
chr1	74571027	74571513
chr1	74587099	74588665
chr1	74588898	74590451
chr1	74600737	74601861
chr1	74661335	74662770
chr1	74712699	74714226
chr1	74727964	74728716
chr1	74748605	74749121
chr1	74749234	74749710
chr1	74769823	74770455
chr1	74770919	74771440
chr1	74771591	74772451
chr1	74772884	74773725
chr1	74775794	74776241
chr1	74776881	74777324
chr1	74781787	74783420
chr1	74783635	74784762
chr1	74787967	74788281
chr1	74788643	74789221
chr1	74791002	74792534
chr1	74792787	74793686
chr1	74793961	74794405
chr1	74794571	74795377
chr1	74802522	74804120
chr1	74804379	74804918
chr1	74805267	74805958
chr1	74806148	74808726
chr1	74815096	74815505
chr1	74816330	74817521
chr1	74824435	74825389
chr1	74850209	74850695
chr1	74851368	74851774
chr1	74853652	74854139
chr1	74854367	74856716
chr1	74857231	74857511
chr1	74858098	74859075
chr1	74880760	74881124
chr1	74881707	74882714
chr1	74884213	74884898
chr1	74884965	74886025
chr1	74892432	74894039
chr1	74896591	74897118
chr1	74900409	74901577
chr1	74902777	74903327
chr1	74926734	74927918
chr1	74947288	74947877
chr1	74948070	74949327
chr1	74949575	74952316
chr1	75124454	75125309
chr1	75125666	75126213
chr1	75132761	75133314
chr1	75133666	75134108
chr1	75135411	75136106
chr1	75140859	75142223
chr1	75142269	75143370
chr1	75143725	75144486
chr1	75168053	75169243
chr1	75169511	75169945
chr1	75179302	75180585
chr1	75182341	75182731
chr1	75182846	75183448
chr1	75184237	75184562
chr1	75185011	75185472
chr1	75185811	75187297
chr1	75190754	75191242
chr1	75191331	75192741
chr1	75208929	75209871
chr1	75210366	75211347
chr1	75211459	75212022
chr1	75214393	75214803
chr1	75214933	75215427
chr1	75218050	75220139
chr1	75231237	75232239
chr1	75235957	75237829
chr1	75238171	75239341
chr1	75243520	75243948
chr1	75244135	75245347
chr1	75248126	75248767
chr1	75250555	75251145
chr1	75251346	75252500
chr1	75252622	75254898
chr1	75255070	75255399
chr1	75257844	75258638
chr1	75262888	75263890
chr1	75263944	75264633
chr1	75276940	75277843
chr1	75315032	75315780
chr1	75315940	75316272
chr1	75316364	75318473
chr1	75343926	75344969
chr1	75345079	75345432
chr1	75345548	75346512
chr1	75347401	75347923
chr1	75359743	75361017
chr1	75374256	75376033
chr1	75380617	75381241
chr1	75381336	75383180
chr1	75384044	75385465
chr1	75386953	75390112
chr1	75398785	75400426
chr1	75403606	75404901
chr1	75415285	75415844
chr1	75418237	75418963
chr1	75421492	75422443
chr1	75422543	75422789
chr1	75422881	75423605
chr1	75426711	75427847
chr1	75428927	75429529
chr1	75431053	75431748
chr1	75435642	75436463
chr1	75440948	75442085
chr1	75442222	75442903
chr1	75445328	75445697
chr1	75445798	75446026
chr1	75446592	75448483
chr1	75448760	75449988
chr1	75450084	75450829
chr1	75450927	75451159
chr1	75451291	75451795
chr1	75456735	75457793
chr1	75458144	75458907
chr1	75469093	75469999
chr1	75472118	75473401
chr1	75473892	75474565
chr1	75475067	75475393
chr1	75475544	75476159
chr1	75476306	75476866
chr1	75477122	75478356
chr1	75478750	75480383
chr1	75480621	75481608
chr1	75482520	75483259
chr1	75484161	75484815
chr1	75486796	75488238
chr1	75488384	75489350
chr1	75489417	75489966
chr1	75490655	75491706
chr1	75491735	75493214
chr1	75495042	75496075
chr1	75502900	75503899
chr1	75505135	75506750
chr1	75506976	75507525
chr1	75509359	75510605
chr1	75518026	75518461
chr1	75521104	75522019
chr1	75524510	75525612
chr1	75528742	75529253
chr1	75529632	75530692
chr1	75545412	75545738
chr1	75545849	75546974
chr1	75547203	75548589
chr1	75551105	75551431
chr1	75551513	75551830
chr1	75552722	75553281
chr1	75553359	75554234
chr1	75556554	75558108
chr1	75558456	75559908
chr1	75587758	75589642
chr1	75704872	75705208
chr1	75888235	75888658
chr1	77446413	77447421
chr1	77473318	77473635
chr1	77473997	77474229
chr1	77496715	77497170
chr1	77513253	77513952
chr1	77514041	77514826
chr1	77514906	77516890
chr1	77711394	77712402
chr1	77972205	77972614
chr1	78189290	78190119
chr1	78196416	78197456
chr1	78215733	78218496
chr1	78309982	78311442
chr1	78412439	78412941
chr1	78488135	78489578
chr1	78511518	78512172
chr1	78602005	78602610
chr1	78657214	78658955
chr1	79439756	79440469
chr1	79450283	79450998
chr1	79581125	79581883
chr1	79671394	79672533
chr1	79760798	79761122
chr1	79761181	79762030
chr1	79775777	79776522
chr1	79858116	79859440
chr1	80150478	80151762
chr1	80237032	80237741
chr1	80314531	80315130
chr1	80339258	80341534
chr1	80504910	80505547
chr1	80757697	80759056
chr1	81554135	81555763
chr1	81593318	81594286
chr1	82282810	82283815
chr1	82286939	82287685
chr1	82288371	82288825
chr1	82289210	82292182
chr1	82292783	82293451
chr1	82316034	82317126
chr1	82523045	82523647
chr1	82586476	82587533
chr1	82724713	82725676
chr1	82772422	82773152
chr1	82834361	82834848
chr1	82838574	82840635
chr1	82924583	82925396
chr1	82948684	82949857
chr1	83038023	83038716
chr1	83159592	83160162
chr1	83275639	83276553
chr1	83406585	83407696
chr1	83408045	83408833
chr1	83922538	83923239
chr1	84279895	84280496
chr1	84283880	84285034
chr1	84286526	84287148
chr1	84404724	84405526
chr1	84405740	84406221
chr1	84406929	84407584
chr1	84622849	84623451
chr1	84694568	84696796
chr1	84721988	84722631
chr1	84837487	84840777
chr1	84848471	84849295
chr1	84849976	84850595
chr1	84850766	84851156
chr1	84860591	84861573
chr1	84866306	84868356
chr1	84868719	84870014
chr1	84871512	84871806
chr1	84872040	84872781
chr1	84879578	84880097
chr1	84881353	84882968
chr1	84883029	84883462
chr1	84887265	84888117
chr1	84889129	84890958
chr1	84892734	84893124
chr1	84895789	84896699
chr1	84899522	84900461
chr1	84933594	84934097
chr1	84934213	84935380
chr1	85703400	85703868
chr1	85792951	85794742
chr1	85894237	85894828
chr1	85894953	85895940
chr1	85907427	85908388
chr1	86018175	86019092
chr1	86032225	86033142
chr1	86045829	86046829
chr1	86046915	86047184
chr1	86048014	86049013
chr1	86059376	86060052
chr1	86060277	86061114
chr1	86062552	86063595
chr1	86063720	86065448
chr1	86143337	86144584
chr1	86150654	86151344
chr1	86151677	86152576
chr1	86153904	86155131
chr1	86156202	86156853
chr1	86171563	86172219
chr1	86178464	86178824
chr1	86178894	86179281
chr1	86186597	86187463
chr1	86188693	86189844
chr1	86214214	86214973
chr1	86236247	86237193
chr1	86286509	86286873
chr1	86294304	86295097
chr1	86297412	86297902
chr1	86300624	86301288
chr1	86301436	86302147
chr1	86302914	86304525
chr1	86305070	86305686
chr1	86306317	86306889
chr1	86307758	86308640
chr1	86308713	86310014
chr1	86310503	86311881
chr1	86313367	86314191
chr1	86336318	86337091
chr1	86337658	86338780
chr1	86339010	86340514
chr1	86358489	86360996
chr1	86378866	86379811
chr1	86380872	86381888
chr1	86387190	86388133
chr1	86389113	86390010
chr1	86415487	86416032
chr1	86421054	86421485
chr1	86425087	86425679
chr1	86425778	86426492
chr1	86427022	86428186
chr1	86429263	86430474
chr1	86432437	86433070
chr1	86433927	86435233
chr1	86436365	86437173
chr1	86437846	86438939
chr1	86439553	86441042
chr1	86441506	86444803
chr1	86449950	86450465
chr1	86450580	86451081
chr1	86467067	86467943
chr1	86470516	86471401
chr1	86471425	86471999
chr1	86472082	86473180
chr1	86480621	86481443
chr1	86481586	86482085
chr1	86487025	86488340
chr1	86488716	86489253
chr1	86491738	86492852
chr1	86496765	86497659
chr1	86497690	86498537
chr1	86498611	86499295
chr1	86499571	86500499
chr1	86500953	86501856
chr1	86502204	86502910
chr1	86505412	86506033
chr1	86506111	86507070
chr1	86507290	86508357
chr1	86508827	86510095
chr1	86510223	86510604
chr1	86511204	86511600
chr1	86511709	86512413
chr1	86518708	86519207
chr1	86519361	86519813
chr1	86519889	86520779
chr1	86521642	86521979
chr1	86522048	86523022
chr1	86523827	86524113
chr1	86529595	86529973
chr1	86530848	86531340
chr1	86531509	86533004
chr1	86533184	86534188
chr1	86535235	86536070
chr1	86536304	86536763
chr1	86537642	86538706
chr1	86543310	86544210
chr1	86581735	86583103
chr1	86586519	86587609
chr1	86647488	86648004
chr1	86653042	86653972
chr1	86668685	86669249
chr1	86669538	86670192
chr1	86670276	86670936
chr1	86703256	86704275
chr1	87041140	87041703
chr1	87070627	87071394
chr1	87098108	87099179
chr1	87126963	87128000
chr1	87152016	87152879
chr1	87153441	87157599
chr1	87172171	87173134
chr1	87173602	87173998
chr1	87174113	87174911
chr1	87175586	87176586
chr1	87180614	87181459
chr1	87185503	87188094
chr1	87190444	87191642
chr1	87201629	87202666
chr1	87205257	87205763
chr1	87206158	87207030
chr1	87207190	87208365
chr1	87208865	87209375
chr1	87209908	87210753
chr1	87210955	87211554
chr1	87213193	87214864
chr1	87214936	87215186
chr1	87217800	87218675
chr1	87225803	87226947
chr1	87229888	87230359
chr1	87230580	87231205
chr1	87245946	87246712
chr1	87258427	87258844
chr1	87263852	87265132
chr1	87265282	87265671
chr1	87326390	87327971
chr1	87379902	87380707
chr1	87470138	87470639
chr1	87471775	87472449
chr1	87474857	87475910
chr1	87480170	87481195
chr1	87508900	87510735
chr1	87550781	87551644
chr1	87667736	87669058
chr1	87676085	87676417
chr1	87689724	87690400
chr1	87755802	87756676
chr1	87790088	87790912
chr1	87791748	87792344
chr1	87852867	87854524
chr1	88007852	88008947
chr1	88205180	88206052
chr1	88212239	88212745
chr1	88215964	88216339
chr1	88216592	88216870
chr1	88218028	88218479
chr1	88220340	88220938
chr1	88221041	88221445
chr1	88223098	88223535
chr1	88223599	88224367
chr1	88225347	88226118
chr1	88226433	88227148
chr1	88227536	88228847
chr1	88229090	88230987
chr1	88231370	88232527
chr1	88232787	88233707
chr1	88234425	88235884
chr1	88236643	88237774
chr1	88238530	88239974
chr1	88240040	88242049
chr1	88243914	88244295
chr1	88244343	88244758
chr1	88247842	88248240
chr1	88248300	88249029
chr1	88252064	88252739
chr1	88252811	88254045
chr1	88254645	88256883
chr1	88257110	88258839
chr1	88259248	88261620
chr1	88261765	88263323
chr1	88266088	88266877
chr1	88267034	88268069
chr1	88268108	88268593
chr1	88268706	88270423
chr1	88271301	88272132
chr1	88272505	88273237
chr1	88274712	88275213
chr1	88275548	88276130
chr1	88276273	88278654
chr1	88279191	88279906
chr1	88280027	88280709
chr1	88283159	88284003
chr1	88284099	88285436
chr1	88286361	88287096
chr1	88287724	88288366
chr1	88291065	88291988
chr1	88295705	88296577
chr1	88297925	88298487
chr1	88299833	88301848
chr1	88302047	88302823
chr1	88303694	88304792
chr1	88309097	88309636
chr1	88310407	88311010
chr1	88464020	88465025
chr1	88465594	88466180
chr1	88466632	88467352
chr1	88605489	88606488
chr1	88608270	88608690
chr1	88668297	88669698
chr1	88700489	88700819
chr1	88700926	88702793
chr1	88705671	88706741
chr1	88745292	88745713
chr1	88800484	88801023
chr1	88807046	88807562
chr1	89068906	89071001
chr1	89071206	89071761
chr1	89093619	89094312
chr1	89095755	89096964
chr1	89102234	89102875
chr1	89103979	89104989
chr1	89130605	89131735
chr1	89131791	89132313
chr1	89132995	89134415
chr1	89137063	89137756
chr1	89182829	89183898
chr1	89191103	89192223
chr1	89453994	89455203
chr1	89457626	89458089
chr1	89525022	89526111
chr1	89568517	89569272
chr1	89576718	89577469
chr1	89579873	89581655
chr1	89581749	89582056
chr1	89626938	89627728
chr1	89634087	89634616
chr1	89688954	89689498
chr1	89756376	89756988
chr1	89763789	89764269
chr1	89872661	89873403
chr1	89876018	89877028
chr1	89921800	89922686
chr1	89922749	89923027
chr1	89923214	89924180
chr1	89926018	89926541
chr1	89928645	89929046
chr1	89929746	89931742
chr1	89933760	89934299
chr1	89935465	89936460
chr1	89939305	89939728
chr1	89939916	89940706
chr1	89941595	89942496
chr1	89967623	89968871
chr1	89992069	89993316
chr1	90153146	90153690
chr1	90202123	90203176
chr1	90203701	90204340
chr1	90424101	90424845
chr1	90524593	90525193
chr1	90603073	90603793
chr1	90901534	90902335
chr1	90914655	90915227
chr1	90928011	90929085
chr1	90961215	90961786
chr1	90969236	90969549
chr1	90998525	90999560
chr1	91052318	91054212
chr1	91144777	91145544
chr1	91178977	91179682
chr1	91179791	91180647
chr1	91249605	91251120
chr1	91297814	91298601
chr1	91318957	91319612
chr1	91321599	91322701
chr1	91325873	91327355
chr1	91342192	91342864
chr1	91343801	91344586
chr1	91345100	91345786
chr1	91346396	91347164
chr1	91360060	91360548
chr1	91364594	91365575
chr1	91365736	91367418
chr1	91367527	91367853
chr1	91368661	91369424
chr1	91369855	91370782
chr1	91371088	91371854
chr1	91373087	91373454
chr1	91398004	91399277
chr1	91411631	91413824
chr1	91413887	91414703
chr1	91419692	91420575
chr1	91423525	91424553
chr1	91427766	91428431
chr1	91458012	91459964
chr1	91460584	91461006
chr1	91493721	91494987
chr1	91495071	91495607
chr1	91533674	91535024
chr1	91537569	91538430
chr1	91539547	91541357
chr1	91600576	91601360
chr1	91800075	91800583
chr1	91801330	91802391
chr1	91802489	91802812
chr1	91816555	91817300
chr1	91919379	91920651
chr1	91922208	91923080
chr1	91925758	91926308
chr1	91928902	91929607
chr1	91930373	91930935
chr1	91978281	91979161
chr1	92176888	92177979
chr1	92179573	92182295
chr1	92183211	92184146
chr1	92348306	92349146
chr1	92359493	92360893
chr1	92431322	92431911
chr1	92432102	92432561
chr1	92436188	92437029
chr1	92437439	92438188
chr1	92473285	92474659
chr1	92641715	92642520
chr1	92648596	92649132
chr1	92790282	92791779
chr1	92829301	92829764
chr1	92829960	92830454
chr1	92830672	92833039
chr1	92833674	92834389
chr1	92835708	92836760
chr1	92839900	92840647
chr1	92844420	92844838
chr1	92848448	92848957
chr1	92849723	92850678
chr1	92853152	92853936
chr1	92854836	92855886
chr1	92858054	92859147
chr1	92895123	92895480
chr1	92902692	92903084
chr1	92903142	92903410
chr1	92906811	92907714
chr1	92907891	92908399
chr1	92908458	92909013
chr1	92911627	92913188
chr1	92914102	92914783
chr1	92915525	92915925
chr1	92917161	92917401
chr1	92918094	92920784
chr1	92920989	92921833
chr1	92933806	92935157
chr1	92939313	92940266
chr1	92941444	92942855
chr1	92944562	92945546
chr1	92945800	92946824
chr1	92951500	92952552
chr1	92977642	92978369
chr1	92978586	92979708
chr1	93008253	93009271
chr1	93022542	93023038
chr1	93024075	93024418
chr1	93076798	93077677
chr1	93097349	93098088
chr1	93114941	93115743
chr1	93160020	93161361
chr1	93172656	93173552
chr1	93173834	93175035
chr1	93175217	93176197
chr1	93176353	93177623
chr1	93192767	93193566
chr1	93210115	93210565
chr1	93214010	93215171
chr1	93217523	93218792
chr1	93223266	93223726
chr1	93223904	93224422
chr1	93227285	93228024
chr1	93235422	93236833
chr1	93236972	93237413
chr1	93284328	93285023
chr1	93305509	93306136
chr1	93342445	93343972
chr1	93373838	93374647
chr1	93394938	93395512
chr1	93396113	93396710
chr1	93399613	93400048
chr1	93408216	93409352
chr1	93430233	93430684
chr1	93430854	93431527
chr1	93444770	93446124
chr1	93477875	93480143
chr1	93511020	93512926
chr1	93607106	93608173
chr1	93634771	93635988
chr1	93636052	93636492
chr1	93667714	93668297
chr1	93668675	93669507
chr1	93685422	93686178
chr1	93686225	93687257
chr1	93687312	93687915
chr1	93688325	93688698
chr1	93689073	93689499
chr1	93690387	93690853
chr1	93694718	93695403
chr1	93696063	93696922
chr1	93697588	93698641
chr1	93725058	93725561
chr1	93726494	93727642
chr1	93753492	93755544
chr1	93784124	93785014
chr1	93786438	93787306
chr1	93787986	93788743
chr1	93803475	93804889
chr1	93805949	93806234
chr1	93806694	93807159
chr1	93810561	93811301
chr1	93811358	93812584
chr1	93816227	93817340
chr1	93817486	93818300
chr1	93818546	93818996
chr1	93819105	93819468
chr1	93820912	93821445
chr1	93822740	93823402
chr1	93823776	93824245
chr1	93824301	93826964
chr1	93827600	93828259
chr1	93834611	93835840
chr1	93837331	93838274
chr1	94034865	94035620
chr1	94040098	94040777
chr1	94051800	94052461
chr1	94079055	94079621
chr1	95310043	95310577
chr1	95313422	95314560
chr1	95667163	95668290
chr1	96614147	96614808
chr1	96871510	96872676
chr1	97660608	97662349
chr1	97726850	97727443
chr1	97768738	97770753
chr1	97976622	97977589
chr1	98094517	98096258
chr1	99772149	99772647
chr1	100509858	100510315
chr1	100878091	100878521
chr1	102825010	102825474
chr1	103471101	103472034
chr1	104768559	104769492
chr1	104993799	104994540
chr1	105012689	105013689
chr1	105355576	105357530
chr1	105488539	105489455
chr1	105491119	105492065
chr1	105522260	105523483
chr1	105662897	105664878
chr1	105780231	105782087
chr1	105844427	105845095
chr1	105880839	105881422
chr1	105907959	105908896
chr1	105981098	105981446
chr1	105989676	105992288
chr1	105993633	105994275
chr1	106034452	106035318
chr1	106036812	106037836
chr1	106038454	106039396
chr1	106170778	106173703
chr1	106392027	106393002
chr1	106394835	106395887
chr1	106407157	106407769
chr1	106514251	106514596
chr1	106629452	106630138
chr1	106711846	106712479
chr1	106712574	106712830
chr1	106713575	106714944
chr1	106715491	106715911
chr1	106721844	106722500
chr1	106758495	106760087
chr1	106795910	106796956
chr1	106816655	106817490
chr1	108377216	108377848
chr1	109982262	109983632
chr1	110699528	110700265
chr1	110790453	110791032
chr1	111144428	111145291
chr1	111864065	111865417
chr1	112416491	112417289
chr1	113963985	113964352
chr1	113964476	113965043
chr1	114288064	114288751
chr1	114849484	114850115
chr1	114905858	114906603
chr1	115560187	115560851
chr1	115684401	115684943
chr1	117457692	117458114
chr1	118257544	118258050
chr1	118268518	118269139
chr1	118292434	118292906
chr1	118293214	118293477
chr1	118293802	118294666
chr1	118310792	118311731
chr1	118320823	118321345
chr1	118321437	118323002
chr1	118328245	118328689
chr1	118388410	118390337
chr1	118422095	118423235
chr1	118445676	118446165
chr1	118452261	118452920
chr1	118456155	118456621
chr1	118457435	118457808
chr1	118458036	118458576
chr1	118458731	118460145
chr1	118460957	118461386
chr1	118498261	118498638
chr1	118625832	118626829
chr1	118627445	118628731
chr1	118630288	118630643
chr1	118642580	118644171
chr1	118645448	118646207
chr1	118649063	118649416
chr1	118649782	118650864
chr1	118652204	118653103
chr1	118670056	118670648
chr1	118682538	118682968
chr1	118686795	118688436
chr1	118690765	118691501
chr1	118691635	118692324
chr1	118695553	118696309
chr1	118756284	118757113
chr1	118772285	118772694
chr1	118824130	118826201
chr1	118836616	118838372
chr1	118864445	118865386
chr1	118865869	118866846
chr1	118872592	118874195
chr1	118946199	118947315
chr1	118954496	118954993
chr1	118968781	118969863
chr1	118972116	118972694
chr1	118976313	118977416
chr1	118981511	118982081
chr1	119003991	119004439
chr1	119004672	119005144
chr1	119010229	119011074
chr1	119019585	119020205
chr1	119029859	119030349
chr1	119036159	119036735
chr1	119047477	119048238
chr1	119048464	119048788
chr1	119048853	119049252
chr1	119051309	119051773
chr1	119051831	119054423
chr1	119064108	119064670
chr1	119065092	119065521
chr1	119066161	119066867
chr1	119074883	119075815
chr1	119075889	119076371
chr1	119076834	119077598
chr1	119077862	119078550
chr1	119081977	119082839
chr1	119083557	119083912
chr1	119084029	119084280
chr1	119084668	119085254
chr1	119088934	119089839
chr1	119119753	119120570
chr1	119136443	119136977
chr1	119143180	119144275
chr1	119166081	119166962
chr1	119167331	119168168
chr1	119189446	119190062
chr1	119292137	119292892
chr1	119299088	119300409
chr1	119301101	119301604
chr1	119301792	119303294
chr1	119304177	119304936
chr1	119329613	119330404
chr1	119345223	119345889
chr1	119347395	119347880
chr1	119348105	119348754
chr1	119348827	119349890
chr1	119388733	119390167
chr1	119390580	119391679
chr1	119397414	119398484
chr1	119398517	119399415
chr1	119404315	119405369
chr1	119408461	119409649
chr1	119416696	119418085
chr1	119419416	119423098
chr1	119423195	119424021
chr1	119424386	119424854
chr1	119443013	119444371
chr1	119451027	119452253
chr1	119453741	119454227
chr1	119496867	119498002
chr1	119504155	119505327
chr1	119524791	119525246
chr1	119525607	119526867
chr1	119532232	119533871
chr1	119537645	119538213
chr1	119540674	119541418
chr1	119548238	119549220
chr1	119634714	119635155
chr1	119642223	119642686
chr1	119648317	119649260
chr1	119836678	119838068
chr1	119912955	119913672
chr1	119965904	119966406
chr1	119996894	119997531
chr1	120006335	120007746
chr1	120032811	120033578
chr1	120071060	120071722
chr1	120073486	120074655
chr1	120074785	120075510
chr1	120083768	120084442
chr1	120085556	120086249
chr1	120086477	120087339
chr1	120090346	120090929
chr1	120094004	120094473
chr1	120119703	120120432
chr1	120120921	120121640
chr1	120197206	120197599
chr1	120235218	120235769
chr1	120258422	120259050
chr1	120264146	120265754
chr1	120338622	120339261
chr1	120340082	120342805
chr1	120468854	120469303
chr1	120582097	120582549
chr1	120595735	120596784
chr1	120596857	120597187
chr1	120602697	120604125
chr1	120604524	120605587
chr1	120613911	120615170
chr1	120644116	120645078
chr1	121082755	121083310
chr1	121087096	121087589
chr1	121177750	121178296
chr1	121327050	121328476
chr1	121430797	121432056
chr1	121440412	121441012
chr1	121441100	121441473
chr1	121527493	121528241
chr1	121528383	121528800
chr1	121567496	121568360
chr1	121702684	121703625
chr1	122041373	122041897
chr1	122554000	122554704
chr1	122607340	122608061
chr1	124044937	124045595
chr1	124045688	124046353
chr1	125434569	125436424
chr1	125508634	125509074
chr1	125509422	125509729
chr1	125560112	125562174
chr1	125676072	125676493
chr1	125676654	125677214
chr1	125729464	125729996
chr1	125911185	125912806
chr1	125912870	125913380
chr1	126149939	126150610
chr1	126492460	126493218
chr1	127204716	127205576
chr1	127205785	127206770
chr1	127238798	127239303
chr1	127424241	127425058
chr1	127461850	127462579
chr1	127482464	127482975
chr1	127484075	127484493
chr1	127484786	127485480
chr1	127569192	127569728
chr1	127676578	127678369
chr1	127773461	127774806
chr1	127796459	127797095
chr1	127802855	127803619
chr1	127868627	127869316
chr1	127904706	127905220
chr1	127990153	127990939
chr1	128099720	128100916
chr1	128102178	128104101
chr1	128243611	128245365
chr1	128303790	128304524
chr1	128304648	128305305
chr1	128313378	128313847
chr1	128328404	128329358
chr1	128358870	128360194
chr1	128362005	128363279
chr1	128392009	128392952
chr1	128416629	128418005
chr1	128471971	128473305
chr1	128589412	128589892
chr1	128590889	128591952
chr1	128592115	128592681
chr1	128592951	128593776
chr1	128859945	128860802
chr1	129106864	129107070
chr1	129107195	129107781
chr1	129272650	129274241
chr1	130369897	130370997
chr1	130422662	130423341
chr1	130462376	130463354
chr1	130715534	130716654
chr1	130716798	130718066
chr1	130731565	130732256
chr1	130737345	130738166
chr1	130741241	130741941
chr1	130786938	130787410
chr1	130788910	130789326
chr1	130789410	130790204
chr1	130877751	130878577
chr1	131051435	131051983
chr1	131052673	131053607
chr1	131057007	131058301
chr1	131059891	131060685
chr1	131096641	131098216
chr1	131107475	131108624
chr1	131119940	131120984
chr1	131122776	131123492
chr1	131128571	131129899
chr1	131137700	131139139
chr1	131139253	131139867
chr1	131149186	131149952
chr1	131152990	131153512
chr1	131160694	131161826
chr1	131163994	131164591
chr1	131179844	131180392
chr1	131181374	131181910
chr1	131182884	131183743
chr1	131232509	131234721
chr1	131244425	131246158
chr1	131258906	131259680
chr1	131260262	131260885
chr1	131269474	131270540
chr1	131274847	131275551
chr1	131275775	131276698
chr1	131278883	131279781
chr1	131286786	131287236
chr1	131287391	131287628
chr1	131289258	131289851
chr1	131381955	131382482
chr1	131525086	131528499
chr1	131528622	131529169
chr1	131598827	131599630
chr1	131613440	131613806
chr1	131658035	131658480
chr1	131690489	131691128
chr1	131714476	131715299
chr1	131719063	131719580
chr1	131745302	131746247
chr1	131746678	131747052
chr1	131747120	131747518
chr1	131747599	131748357
chr1	131765366	131766310
chr1	131797192	131797741
chr1	131827048	131827475
chr1	131827565	131828938
chr1	131829884	131830882
chr1	131867006	131867538
chr1	131867866	131868402
chr1	131890077	131891222
chr1	131909723	131911977
chr1	131940663	131941377
chr1	131945417	131945824
chr1	131945982	131946462
chr1	131947856	131948502
chr1	131953096	131953750
chr1	131962557	131964211
chr1	131969997	131971791
chr1	131976191	131977282
chr1	131977726	131978477
chr1	131981550	131982460
chr1	132007230	132008750
chr1	132067182	132068384
chr1	132104270	132104628
chr1	132104770	132104986
chr1	132110091	132111166
chr1	132116236	132116885
chr1	132118045	132118701
chr1	132118832	132119342
chr1	132121129	132121822
chr1	132121886	132122585
chr1	132137836	132138407
chr1	132139408	132140496
chr1	132151006	132152272
chr1	132155495	132156030
chr1	132156099	132156487
chr1	132157085	132157855
chr1	132158150	132158636
chr1	132159445	132159897
chr1	132189604	132192616
chr1	132195518	132195960
chr1	132196258	132196724
chr1	132196905	132197240
chr1	132197360	132198131
chr1	132198671	132199286
chr1	132199903	132202027
chr1	132204746	132205155
chr1	132206922	132207864
chr1	132211790	132212847
chr1	132233208	132233874
chr1	132237651	132238237
chr1	132263753	132264555
chr1	132264630	132265829
chr1	132268623	132269584
chr1	132281596	132282698
chr1	132288094	132288862
chr1	132292764	132293414
chr1	132297758	132299523
chr1	132304536	132305233
chr1	132315105	132316849
chr1	132322628	132323296
chr1	132341898	132342399
chr1	132353324	132353729
chr1	132354632	132355328
chr1	132358567	132359310
chr1	132360182	132360574
chr1	132360820	132361290
chr1	132366726	132367166
chr1	132380412	132381484
chr1	132389877	132390266
chr1	132391377	132392173
chr1	132417199	132418365
chr1	132476674	132477266
chr1	132477343	132477682
chr1	132514651	132515172
chr1	132515684	132516439
chr1	132518205	132519438
chr1	132520164	132520729
chr1	132520801	132521016
chr1	132521629	132522016
chr1	132523187	132523882
chr1	132525620	132526797
chr1	132528087	132529358
chr1	132533023	132533472
chr1	132533601	132534462
chr1	132534549	132535866
chr1	132540722	132541759
chr1	132541880	132543272
chr1	132586361	132587341
chr1	132602091	132602616
chr1	132703425	132704082
chr1	132738835	132739549
chr1	132740312	132740967
chr1	132741439	132742024
chr1	132758586	132759364
chr1	132812629	132814050
chr1	132850582	132851417
chr1	132878452	132879292
chr1	132879560	132881603
chr1	132881743	132882191
chr1	132920760	132922292
chr1	132934901	132935232
chr1	132936807	132937936
chr1	132938173	132939482
chr1	132977119	132977931
chr1	132978488	132979382
chr1	132980626	132980890
chr1	132982422	132982751
chr1	132982820	132983037
chr1	132983368	132983727
[truncated: 66,483 more rows]

## Sheet: Supplementary Table 2d
Chr	Start	End	Sort
chr1	3670287	3672702	Active
chr1	4491377	4493872	Active
chr1	4785296	4786146	Active
chr1	4807423	4808356	Active
chr1	4855252	4856285	Active
chr1	4857372	4858651	Active
chr1	5017766	5020133	Active
chr1	5020260	5020581	Active
chr1	5020655	5021628	Active
chr1	5082784	5083651	Active
chr1	6214004	6215536	Active
chr1	6358787	6359792	Active
chr1	7087816	7088264	Active
chr1	7088445	7090059	Active
chr1	9298445	9299074	Active
chr1	9299138	9300339	Active
chr1	9544756	9545737	Active
chr1	9547942	9549071	Active
chr1	9629869	9630584	Active
chr1	9699434	9701177	Active
chr1	9701687	9702392	Active
chr1	9747406	9747740	Active
chr1	9747813	9748878	Active
chr1	9797714	9798792	Active
chr1	9848104	9849120	Active
chr1	9908411	9909521	Active
chr1	9943687	9944601	Active
chr1	9966713	9968518	Active
chr1	10008950	10009527	Active
chr1	10037263	10038422	Active
chr1	10038674	10040458	Active
chr1	10231513	10233735	Active
chr1	10993387	10994030	Active
chr1	11413623	11414992	Active
chr1	12690658	12691296	Active
chr1	12691787	12692761	Active
chr1	12717948	12718456	Active
chr1	12718592	12718796	Active
chr1	12989509	12991577	Active
chr1	12991972	12993571	Active
chr1	13124375	13126096	Active
chr1	13126475	13126806	Active
chr1	13127028	13128666	Active
chr1	13372047	13374950	Active
chr1	13589096	13590486	Active
chr1	13659116	13661425	Active
chr1	14309453	14310463	Active
chr1	14754974	14757431	Active
chr1	14918730	14919046	Active
chr1	15285947	15287406	Active
chr1	15805293	15806496	Active
chr1	15892128	15893112	Active
chr1	16092718	16094052	Active
chr1	16103851	16106708	Active
chr1	16518322	16519613	Active
chr1	16519692	16520170	Active
chr1	16618555	16619828	Active
chr1	16656205	16657706	Active
chr1	16664696	16665968	Active
chr1	17096600	17098268	Active
chr1	17727035	17727890	Active
chr1	19209746	19210636	Active
chr1	20819845	20820725	Active
chr1	20890318	20891162	Active
chr1	20891513	20891779	Active
chr1	20951066	20952240	Active
chr1	21078611	21079891	Active
chr1	21218413	21218990	Active
chr1	21960528	21962747	Active
chr1	22804969	22806459	Active
chr1	23382541	23383713	Active
chr1	23761393	23763600	Active
chr1	23921507	23922683	Active
chr1	24005419	24005827	Active
chr1	24099429	24100856	Active
chr1	24678234	24679299	Active
chr1	25829697	25831036	Active
chr1	30948421	30950424	Active
chr1	32172056	32173314	Active
chr1	33669326	33670876	Active
chr1	33719454	33720579	Active
chr1	33721786	33722805	Active
chr1	33757094	33758142	Active
chr1	33812765	33813759	Active
chr1	33814020	33814854	Active
chr1	33907309	33908376	Active
chr1	33909114	33909760	Active
chr1	34011041	34012243	Active
chr1	34432758	34433681	Active
chr1	34434652	34435383	Active
chr1	34439078	34440265	Active
chr1	34459347	34460613	Active
chr1	34536497	34537631	Active
chr1	34579248	34580040	Active
chr1	34677257	34678424	Active
chr1	34801606	34802443	Active
chr1	34842401	34843385	Active
chr1	34849759	34850273	Active
chr1	36067686	36070041	Active
chr1	36070159	36071061	Active
chr1	36243764	36244647	Active
chr1	36307354	36308290	Active
chr1	36308571	36308871	Active
chr1	36367757	36369792	Active
chr1	36444564	36445720	Active
chr1	36470948	36472905	Active
chr1	36511320	36513173	Active
chr1	36546200	36548567	Active
chr1	36555687	36556164	Active
chr1	36556273	36558620	Active
chr1	36682533	36683667	Active
chr1	36683946	36684569	Active
chr1	36690808	36692373	Active
chr1	36707637	36708191	Active
chr1	36709272	36710643	Active
chr1	36778759	36779534	Active
chr1	36938764	36940490	Active
chr1	37029012	37029788	Active
chr1	37299517	37300609	Active
chr1	37429362	37430967	Active
chr1	37540346	37541697	Active
chr1	37719245	37720305	Active
chr1	37864391	37865625	Active
chr1	37871744	37872803	Active
chr1	37890083	37890782	Active
chr1	37996216	37997663	Active
chr1	37997723	37998724	Active
chr1	38128864	38130564	Active
chr1	38131213	38131590	Active
chr1	38626423	38628140	Active
chr1	38628436	38628698	Active
chr1	38835579	38836787	Active
chr1	38897239	38897699	Active
chr1	38897767	38898293	Active
chr1	38986979	38988243	Active
chr1	39192270	39194739	Active
chr1	39367587	39368583	Active
chr1	39477724	39479153	Active
chr1	39533445	39534353	Active
chr1	39535396	39536397	Active
chr1	39576282	39577933	Active
chr1	39649965	39650986	Active
chr1	39651090	39651430	Active
chr1	39899973	39901669	Active
chr1	39902692	39903385	Active
chr1	40266465	40267014	Active
chr1	40325844	40326396	Active
chr1	40680921	40682138	Active
chr1	40790361	40791096	Active
chr1	42696399	42697018	Active
chr1	42697297	42698904	Active
chr1	42850951	42851725	Active
chr1	42952515	42953725	Active
chr1	43091836	43093229	Active
chr1	43098305	43099199	Active
chr1	43163079	43163504	Active
chr1	43163589	43164404	Active
chr1	43445037	43446912	Active
chr1	43730461	43731030	Active
chr1	43826624	43828205	Active
chr1	43933441	43934716	Active
chr1	44101624	44102819	Active
chr1	44118339	44120696	Active
chr1	44147517	44148420	Active
chr1	44551346	44552781	Active
chr1	45794830	45795944	Active
chr1	45925060	45925861	Active
chr1	45926031	45926642	Active
chr1	46066589	46067193	Active
chr1	46852527	46854330	Active
chr1	50926198	50928317	Active
chr1	51477316	51479001	Active
chr1	51914808	51916278	Active
chr1	52008360	52008989	Active
chr1	52009107	52009380	Active
chr1	52118950	52120159	Active
chr1	52231964	52233876	Active
chr1	52499624	52501101	Active
chr1	52630406	52631348	Active
chr1	52726262	52727838	Active
chr1	52816997	52818093	Active
chr1	52844508	52845628	Active
chr1	52952215	52954115	Active
chr1	52954148	52955427	Active
chr1	52964513	52965020	Active
chr1	53296573	53297561	Active
chr1	53313273	53314014	Active
chr1	53352285	53352924	Active
chr1	53706298	53707077	Active
chr1	53784540	53785602	Active
chr1	54194181	54195373	Active
chr1	54250276	54251228	Active
chr1	54438331	54439250	Active
chr1	54556972	54558264	Active
chr1	54925492	54927063	Active
chr1	55026762	55027873	Active
chr1	55052071	55053508	Active
chr1	55086875	55088687	Active
chr1	55088776	55089191	Active
chr1	55130818	55132006	Active
chr1	55234489	55235460	Active
chr1	55236832	55237974	Active
chr1	55362261	55364233	Active
chr1	55405409	55407469	Active
chr1	56969283	56970331	Active
chr1	56970621	56971270	Active
chr1	56971360	56971787	Active
chr1	56971996	56973974	Active
chr1	57377184	57378466	Active
chr1	57406059	57407532	Active
chr1	57774102	57775877	Active
chr1	57969512	57970440	Active
chr1	57995618	57996187	Active
chr1	57996276	57996736	Active
chr1	58029228	58030518	Active
chr1	58392422	58394111	Active
chr1	58423010	58424490	Active
chr1	58424650	58425630	Active
chr1	58444476	58446174	Active
chr1	58504101	58505246	Active
chr1	58585548	58586876	Active
chr1	58711397	58711899	Active
chr1	58713285	58713777	Active
chr1	58795370	58796299	Active
chr1	58972719	58974386	Active
chr1	59119518	59120651	Active
chr1	59162618	59163311	Active
chr1	59236617	59237753	Active
chr1	59256517	59257294	Active
chr1	59481196	59484076	Active
chr1	59515744	59516933	Active
chr1	59669963	59671448	Active
chr1	59684570	59686075	Active
chr1	59762117	59764250	Active
chr1	59764351	59765060	Active
chr1	59912281	59914303	Active
chr1	60042305	60043527	Active
chr1	60097384	60098785	Active
chr1	60180031	60181349	Active
chr1	60342956	60343989	Active
chr1	60408956	60410378	Active
chr1	60565221	60565733	Active
chr1	60565927	60567530	Active
chr1	61638488	61639492	Active
chr1	61639565	61640085	Active
chr1	62702637	62703960	Active
chr1	62704691	62705459	Active
chr1	62705781	62707190	Active
chr1	62707405	62708335	Active
chr1	62794030	62794922	Active
chr1	62795377	62796096	Active
chr1	63112944	63114362	Active
chr1	63114435	63114799	Active
chr1	63176114	63177961	Active
chr1	63178052	63178638	Active
chr1	63179902	63180991	Active
chr1	63181049	63181866	Active
chr1	63200033	63200795	Active
chr1	63210025	63210731	Active
chr1	63213378	63214341	Active
chr1	63272726	63274043	Active
chr1	63445188	63446922	Active
chr1	64120411	64120922	Active
chr1	64121033	64122580	Active
chr1	64531803	64534120	Active
chr1	64616687	64618061	Active
chr1	64689886	64692030	Active
chr1	64734663	64739255	Active
chr1	64956383	64957118	Active
chr1	65177992	65179675	Active
chr1	65185255	65185885	Active
chr1	65186330	65187228	Active
chr1	65311105	65311939	Active
chr1	66174564	66175807	Active
chr1	66467823	66468981	Active
chr1	66700075	66700455	Active
chr1	66700515	66701462	Active
chr1	66816465	66816739	Active
chr1	66816911	66818243	Active
chr1	66862545	66863484	Active
chr1	67038414	67039016	Active
chr1	69105654	69106703	Active
chr1	69106854	69108373	Active
chr1	69108492	69108898	Active
chr1	69687004	69688015	Active
chr1	69826691	69827370	Active
chr1	71102143	71103449	Active
chr1	71556576	71557748	Active
chr1	72210777	72211167	Active
chr1	72211486	72213094	Active
chr1	72242407	72243474	Active
chr1	72243656	72245149	Active
chr1	72283917	72284614	Active
chr1	72307029	72307817	Active
chr1	72582758	72583750	Active
chr1	72711214	72711996	Active
chr1	72712583	72713316	Active
chr1	72823702	72825091	Active
chr1	72825311	72825629	Active
chr1	72827754	72828343	Active
chr1	72872566	72872841	Active
chr1	72873484	72875509	Active
chr1	74124088	74124977	Active
chr1	74125218	74125680	Active
chr1	74235939	74237730	Active
chr1	74279085	74279768	Active
chr1	74284123	74285895	Active
chr1	74303504	74304637	Active
chr1	74332232	74332900	Active
chr1	74333056	74333445	Active
chr1	74361839	74362242	Active
chr1	74362678	74363544	Active
chr1	74389549	74390004	Active
chr1	74390123	74390283	Active
chr1	74390941	74393354	Active
chr1	74408544	74409849	Active
chr1	74505136	74507262	Active
chr1	74587099	74588665	Active
chr1	74588898	74590451	Active
chr1	74600737	74601861	Active
chr1	74661335	74662770	Active
chr1	74712699	74714226	Active
chr1	74748605	74749121	Active
chr1	74771591	74772451	Active
chr1	74772884	74773725	Active
chr1	74854367	74856716	Active
chr1	74858098	74859075	Active
chr1	75140859	75142223	Active
chr1	75142269	75143370	Active
chr1	75168053	75169243	Active
chr1	75169511	75169945	Active
chr1	75179302	75180585	Active
chr1	75190754	75191242	Active
chr1	75191331	75192741	Active
chr1	75208929	75209871	Active
chr1	75210366	75211347	Active
chr1	75211459	75212022	Active
chr1	75218050	75220139	Active
chr1	75235957	75237829	Active
chr1	75262888	75263890	Active
chr1	75263944	75264633	Active
chr1	75315032	75315780	Active
chr1	75315940	75316272	Active
chr1	75316364	75318473	Active
chr1	75359743	75361017	Active
chr1	75374256	75376033	Active
chr1	75381336	75383180	Active
chr1	75435642	75436463	Active
chr1	75477122	75478356	Active
chr1	75478750	75480383	Active
chr1	75505135	75506750	Active
chr1	75521104	75522019	Active
chr1	75545849	75546974	Active
chr1	75547203	75548589	Active
chr1	77496715	77497170	Active
chr1	77513253	77513952	Active
chr1	77514041	77514826	Active
chr1	77514906	77516890	Active
chr1	78309982	78311442	Active
chr1	78488135	78489578	Active
chr1	78511518	78512172	Active
chr1	78657214	78658955	Active
chr1	79671394	79672533	Active
chr1	79760798	79761122	Active
chr1	79761181	79762030	Active
chr1	79775777	79776522	Active
chr1	79858116	79859440	Active
chr1	80339258	80341534	Active
chr1	80757697	80759056	Active
chr1	82289210	82292182	Active
chr1	82292783	82293451	Active
chr1	82316034	82317126	Active
chr1	82586476	82587533	Active
chr1	82724713	82725676	Active
chr1	82838574	82840635	Active
chr1	83038023	83038716	Active
chr1	83159592	83160162	Active
chr1	84283880	84285034	Active
chr1	84694568	84696796	Active
chr1	84837487	84840777	Active
chr1	84933594	84934097	Active
chr1	84934213	84935380	Active
chr1	85792951	85794742	Active
chr1	85894237	85894828	Active
chr1	85894953	85895940	Active
chr1	86045829	86046829	Active
chr1	86046915	86047184	Active
chr1	86062552	86063595	Active
chr1	86063720	86065448	Active
chr1	86153904	86155131	Active
chr1	86300624	86301288	Active
chr1	86301436	86302147	Active
chr1	86302914	86304525	Active
chr1	86305070	86305686	Active
chr1	86306317	86306889	Active
chr1	86307758	86308640	Active
chr1	86308713	86310014	Active
chr1	86310503	86311881	Active
chr1	86358489	86360996	Active
chr1	86425087	86425679	Active
chr1	86425778	86426492	Active
chr1	86427022	86428186	Active
chr1	86523827	86524113	Active
chr1	86529595	86529973	Active
chr1	86581735	86583103	Active
chr1	86669538	86670192	Active
chr1	86670276	86670936	Active
chr1	86703256	86704275	Active
chr1	87153441	87157599	Active
chr1	87190444	87191642	Active
chr1	87263852	87265132	Active
chr1	87326390	87327971	Active
chr1	87508900	87510735	Active
chr1	87755802	87756676	Active
chr1	87852867	87854524	Active
chr1	88007852	88008947	Active
chr1	88205180	88206052	Active
chr1	88275548	88276130	Active
chr1	88276273	88278654	Active
chr1	88700489	88700819	Active
chr1	88700926	88702793	Active
chr1	89068906	89071001	Active
chr1	89071206	89071761	Active
chr1	89453994	89455203	Active
chr1	89926018	89926541	Active
chr1	89928645	89929046	Active
chr1	89929746	89931742	Active
chr1	89935465	89936460	Active
chr1	90153146	90153690	Active
chr1	90202123	90203176	Active
chr1	90203701	90204340	Active
chr1	90603073	90603793	Active
chr1	90914655	90915227	Active
chr1	90969236	90969549	Active
chr1	90998525	90999560	Active
chr1	91052318	91054212	Active
chr1	91179791	91180647	Active
chr1	91249605	91251120	Active
chr1	91297814	91298601	Active
chr1	91365736	91367418	Active
chr1	91398004	91399277	Active
chr1	91411631	91413824	Active
chr1	91413887	91414703	Active
chr1	91458012	91459964	Active
chr1	91493721	91494987	Active
chr1	91495071	91495607	Active
chr1	91539547	91541357	Active
chr1	91800075	91800583	Active
chr1	91801330	91802391	Active
chr1	91802489	91802812	Active
chr1	92179573	92182295	Active
chr1	92473285	92474659	Active
chr1	92641715	92642520	Active
chr1	92830672	92833039	Active
chr1	92848448	92848957	Active
chr1	92902692	92903084	Active
chr1	92903142	92903410	Active
chr1	92906811	92907714	Active
chr1	92907891	92908399	Active
chr1	92911627	92913188	Active
chr1	92933806	92935157	Active
chr1	92978586	92979708	Active
chr1	93160020	93161361	Active
chr1	93235422	93236833	Active
chr1	93236972	93237413	Active
chr1	93305509	93306136	Active
chr1	93342445	93343972	Active
chr1	93444770	93446124	Active
chr1	93477875	93480143	Active
chr1	93511020	93512926	Active
chr1	93634771	93635988	Active
chr1	93636052	93636492	Active
chr1	93685422	93686178	Active
chr1	93686225	93687257	Active
chr1	93753492	93755544	Active
chr1	93803475	93804889	Active
chr1	93824301	93826964	Active
chr1	95313422	95314560	Active
chr1	95667163	95668290	Active
chr1	96871510	96872676	Active
chr1	97660608	97662349	Active
chr1	97768738	97770753	Active
chr1	98094517	98096258	Active
chr1	104768559	104769492	Active
chr1	105355576	105357530	Active
chr1	105662897	105664878	Active
chr1	105780231	105782087	Active
chr1	105989676	105992288	Active
chr1	105993633	105994275	Active
chr1	106170778	106173703	Active
chr1	106713575	106714944	Active
chr1	106758495	106760087	Active
chr1	106795910	106796956	Active
chr1	109982262	109983632	Active
chr1	111864065	111865417	Active
chr1	112416491	112417289	Active
chr1	118310792	118311731	Active
chr1	118320823	118321345	Active
chr1	118321437	118323002	Active
chr1	118388410	118390337	Active
chr1	118457435	118457808	Active
chr1	118458036	118458576	Active
chr1	118458731	118460145	Active
chr1	118625832	118626829	Active
chr1	118627445	118628731	Active
chr1	119048853	119049252	Active
chr1	119051309	119051773	Active
chr1	119051831	119054423	Active
chr1	119419416	119423098	Active
chr1	119423195	119424021	Active
chr1	119504155	119505327	Active
chr1	119524791	119525246	Active
chr1	119525607	119526867	Active
chr1	119537645	119538213	Active
chr1	119648317	119649260	Active
chr1	119836678	119838068	Active
chr1	119912955	119913672	Active
chr1	119996894	119997531	Active
chr1	120073486	120074655	Active
chr1	120074785	120075510	Active
chr1	120119703	120120432	Active
chr1	120120921	120121640	Active
chr1	120264146	120265754	Active
chr1	120602697	120604125	Active
chr1	121087096	121087589	Active
chr1	121327050	121328476	Active
chr1	121430797	121432056	Active
chr1	121567496	121568360	Active
chr1	124044937	124045595	Active
chr1	124045688	124046353	Active
chr1	125434569	125436424	Active
chr1	125560112	125562174	Active
chr1	125676654	125677214	Active
chr1	125911185	125912806	Active
chr1	125912870	125913380	Active
chr1	126492460	126493218	Active
chr1	127204716	127205576	Active
chr1	127205785	127206770	Active
chr1	127676578	127678369	Active
chr1	127773461	127774806	Active
chr1	127868627	127869316	Active
chr1	128102178	128104101	Active
chr1	128243611	128245365	Active
chr1	128358870	128360194	Active
chr1	128416629	128418005	Active
chr1	128590889	128591952	Active
chr1	128592115	128592681	Active
chr1	128592951	128593776	Active
chr1	129272650	129274241	Active
chr1	130462376	130463354	Active
chr1	130715534	130716654	Active
chr1	130716798	130718066	Active
chr1	130731565	130732256	Active
chr1	131096641	131098216	Active
chr1	131137700	131139139	Active
chr1	131139253	131139867	Active
chr1	131152990	131153512	Active
chr1	131244425	131246158	Active
chr1	131525086	131528499	Active
chr1	131528622	131529169	Active
chr1	131797192	131797741	Active
chr1	131827048	131827475	Active
chr1	131827565	131828938	Active
chr1	131867006	131867538	Active
chr1	131867866	131868402	Active
chr1	131909723	131911977	Active
chr1	131962557	131964211	Active
chr1	131969997	131971791	Active
chr1	132007230	132008750	Active
chr1	132137836	132138407	Active
chr1	132139408	132140496	Active
chr1	132189604	132192616	Active
chr1	132297758	132299523	Active
chr1	132315105	132316849	Active
chr1	132389877	132390266	Active
chr1	132391377	132392173	Active
chr1	132417199	132418365	Active
chr1	132476674	132477266	Active
chr1	132477343	132477682	Active
chr1	132540722	132541759	Active
chr1	132541880	132543272	Active
chr1	132740312	132740967	Active
chr1	132741439	132742024	Active
chr1	132878452	132879292	Active
chr1	132879560	132881603	Active
chr1	132881743	132882191	Active
chr1	133024791	133025971	Active
chr1	133045331	133046933	Active
chr1	133130635	133131806	Active
chr1	133131948	133132535	Active
chr1	133363199	133365838	Active
chr1	133422415	133424461	Active
chr1	133609679	133610897	Active
chr1	133660482	133661564	Active
chr1	134077589	134078037	Active
chr1	134078793	134079655	Active
chr1	134233775	134234553	Active
chr1	134234648	134235911	Active
chr1	134290224	134290546	Active
chr1	134361468	134362387	Active
chr1	134405619	134407272	Active
chr1	134407933	134408597	Active
chr1	134414658	134416061	Active
chr1	134417174	134418214	Active
chr1	134454885	134456004	Active
chr1	134494333	134495349	Active
chr1	134646195	134647243	Active
chr1	134647322	134647526	Active
chr1	134708393	134709502	Active
chr1	134709800	134710409	Active
chr1	134954873	134956222	Active
chr1	134962120	134962820	Active
chr1	135104249	135104588	Active
chr1	135104847	135105771	Active
chr1	135105877	135106450	Active
chr1	135130991	135131702	Active
chr1	135132295	135133529	Active
chr1	135146324	135148021	Active
chr1	135258210	135258785	Active
chr1	135259024	135259336	Active
chr1	135283067	135284377	Active
chr1	135313408	135314094	Active
chr1	135324557	135325535	Active
chr1	135373890	135375592	Active
chr1	135430056	135430938	Active
chr1	135583083	135584161	Active
chr1	135584578	135585344	Active
chr1	135585579	135586078	Active
chr1	135728447	135729759	Active
chr1	135765436	135766778	Active
chr1	135766975	135767262	Active
chr1	135818251	135819322	Active
chr1	135918327	135918862	Active
chr1	135918950	135919382	Active
chr1	136017644	136018803	Active
chr1	136130924	136132052	Active
chr1	136231156	136232171	Active
chr1	136232965	136234720	Active
chr1	136259712	136261242	Active
chr1	136344820	136346381	Active
chr1	136346687	136347101	Active
chr1	136414762	136415711	Active
chr1	136465978	136466830	Active
chr1	136624184	136626101	Active
chr1	136683361	136683887	Active
chr1	136694662	136695369	Active
chr1	136695476	136696744	Active
chr1	136951174	136952513	Active
chr1	136952580	136953333	Active
chr1	136953976	136954355	Active
chr1	138617808	138618534	Active
chr1	138618834	138619985	Active
chr1	138620007	138620555	Active
chr1	138856462	138857319	Active
chr1	138962702	138964435	Active
chr1	139379119	139379938	Active
chr1	139421662	139423041	Active
chr1	139453606	139455758	Active
chr1	140245269	140246949	Active
chr1	143702041	143703428	Active
chr1	143738900	143739828	Active
chr1	143740055	143740329	Active
chr1	143776386	143778201	Active
chr1	144003453	144004983	Active
chr1	146497323	146498123	Active
chr1	149960681	149961330	Active
chr1	150099299	150100396	Active
chr1	150392241	150394018	Active
chr1	150993114	150994015	Active
chr1	151343930	151345557	Active
chr1	151427722	151429605	Active
chr1	151500027	151501460	Active
chr1	151570339	151572100	Active
chr1	151754829	151756376	Active
chr1	152088878	152091484	Active
chr1	152386210	152386972	Active
chr1	152399566	152400653	Active
chr1	152624495	152625445	Active
chr1	152765713	152767299	Active
chr1	152901653	152904093	Active
chr1	152904232	152905157	Active
chr1	152954752	152955450	Active
chr1	152955563	152956496	Active
chr1	153185448	153186780	Active
chr1	153331558	153333633	Active
chr1	153424215	153425727	Active
chr1	153488116	153488660	Active
chr1	153549425	153550056	Active
chr1	153652439	153653631	Active
chr1	153739467	153740003	Active
chr1	153740076	153740673	Active
chr1	153740870	153741960	Active
chr1	153898823	153899238	Active
chr1	153899449	153901746	Active
chr1	155082524	155084182	Active
chr1	155097946	155099927	Active
chr1	155158282	155159337	Active
chr1	155243937	155245162	Active
chr1	155416650	155417781	Active
chr1	155557447	155558955	Active
chr1	155740472	155743658	Active
chr1	155812253	155813543	Active
chr1	155972553	155974408	Active
chr1	156035377	156036968	Active
chr1	156040245	156041251	Active
chr1	156204205	156205523	Active
chr1	156302883	156303796	Active
chr1	156420269	156421595	Active
chr1	156473855	156474661	Active
chr1	156558165	156559606	Active
chr1	156672630	156673100	Active
chr1	156673356	156675185	Active
chr1	156718328	156719550	Active
chr1	156938294	156940340	Active
chr1	157411421	157412891	Active
chr1	157458021	157459387	Active
chr1	158355525	158356717	Active
chr1	158362044	158363296	Active
chr1	159231608	159233536	Active
chr1	160044150	160045058	Active
chr1	160194856	160195788	Active
chr1	160209893	160210248	Active
chr1	160212143	160213428	Active
chr1	160791910	160793421	Active
chr1	160905898	160907347	Active
chr1	161033176	161033834	Active
chr1	161033902	161037050	Active
chr1	161070124	161071371	Active
chr1	161130569	161131797	Active
chr1	161142482	161143120	Active
chr1	161160091	161160813	Active
chr1	161249960	161251761	Active
chr1	161251948	161252372	Active
chr1	161875499	161878105	Active
chr1	161968865	161969961	Active
chr1	162547969	162549032	Active
chr1	162570060	162571658	Active
chr1	162739548	162740989	Active
chr1	163311745	163312773	Active
chr1	163402957	163404222	Active
chr1	163779223	163780229	Active
chr1	163928279	163929159	Active
chr1	163929395	163930491	Active
chr1	163993791	163994178	Active
chr1	163994285	163995223	Active
chr1	164151152	164152122	Active
chr1	164247648	164248222	Active
chr1	164248403	164250088	Active
chr1	164275468	164276165	Active
chr1	164306751	164308285	Active
chr1	164457273	164459403	Active
chr1	164502806	164503817	Active
chr1	164503934	164504248	Active
chr1	165193683	165195317	Active
chr1	165236299	165237617	Active
chr1	165459180	165462188	Active
chr1	165633828	165635310	Active
chr1	165707587	165708305	Active
chr1	165763535	165764231	Active
chr1	166001220	166003687	Active
chr1	166126301	166127380	Active
chr1	166238387	166238888	Active
chr1	166253878	166254411	Active
chr1	166378509	166380299	Active
chr1	166409153	166410331	Active
chr1	167000266	167002056	Active
chr1	167002123	167002876	Active
chr1	167283521	167285819	Active
chr1	167289628	167290553	Active
chr1	167308171	167309333	Active
chr1	167349677	167350928	Active
chr1	167392634	167394512	Active
chr1	167394695	167395758	Active
chr1	167598214	167599098	Active
chr1	167599296	167600485	Active
chr1	167687919	167689658	Active
chr1	168431742	168432765	Active
chr1	169530825	169531981	Active
chr1	169968756	169969674	Active
chr1	170173957	170175635	Active
chr1	170214774	170215553	Active
chr1	170588837	170590119	Active
chr1	170644166	170645106	Active
chr1	170867176	170867968	Active
chr1	170868385	170868976	Active
chr1	170884843	170885682	Active
chr1	171149891	171150892	Active
chr1	171195427	171196424	Active
chr1	171219427	171220503	Active
chr1	171220718	171221338	Active
chr1	171221540	171222835	Active
chr1	171233987	171234494	Active
chr1	171246859	171247849	Active
chr1	171247915	171248328	Active
chr1	171248455	171248868	Active
chr1	171250877	171251211	Active
chr1	171252061	171252352	Active
chr1	171252695	171253385	Active
chr1	171271924	171272325	Active
chr1	171280066	171282039	Active
chr1	171286221	171286937	Active
chr1	171287322	171288670	Active
chr1	171294426	171294861	Active
chr1	171328230	171330837	Active
chr1	171344270	171344931	Active
chr1	171345347	171346184	Active
chr1	171360031	171361187	Active
chr1	171361292	171361958	Active
chr1	171370155	171371206	Active
chr1	171388465	171389024	Active
chr1	171389093	171389460	Active
chr1	171389619	171390392	Active
chr1	171410799	171412369	Active
chr1	171413155	171414016	Active
chr1	171418994	171419658	Active
chr1	171419817	171420038	Active
chr1	171437140	171438347	Active
chr1	171441598	171442022	Active
chr1	171500818	171503172	Active
chr1	171503246	171504470	Active
chr1	172026258	172027808	Active
chr1	172082354	172083419	Active
chr1	172126443	172127479	Active
chr1	172147700	172148932	Active
chr1	172204974	172205769	Active
chr1	172205846	172207205	Active
chr1	172218262	172218523	Active
chr1	172218599	172219072	Active
chr1	172219194	172220805	Active
chr1	172340644	172341693	Active
chr1	172376023	172377464	Active
chr1	172480722	172481082	Active
chr1	172481240	172482786	Active
chr1	172482990	172484163	Active
chr1	172499453	172501610	Active
chr1	172501656	172503124	Active
chr1	172503350	172504053	Active
chr1	172520567	172521379	Active
chr1	172521749	172521985	Active
chr1	172550062	172551127	Active
chr1	172632273	172633783	Active
chr1	173365454	173366499	Active
chr1	173366825	173368391	Active
chr1	174172447	174172829	Active
chr1	174501579	174502067	Active
chr1	174502240	174503745	Active
chr1	175491639	175493287	Active
chr1	175624824	175626052	Active
chr1	175691724	175693743	Active
chr1	175879893	175881374	Active
chr1	176274577	176276012	Active
chr1	176813345	176815184	Active
chr1	176834844	176835615	Active
chr1	176835698	176836064	Active
chr1	177441238	177442787	Active
chr1	177443049	177443542	Active
chr1	177795777	177796935	Active
chr1	178187215	178187616	Active
chr1	178318027	178320167	Active
chr1	178320339	178320918	Active
chr1	178320986	178321665	Active
chr1	178405385	178407045	Active
chr1	178527279	178531244	Active
chr1	179516901	179518493	Active
chr1	179545898	179546982	Active
chr1	179667885	179668810	Active
chr1	179802810	179804806	Active
chr1	179958919	179960688	Active
chr1	180195089	180195496	Active
chr1	180195601	180196394	Active
chr1	180255074	180256814	Active
chr1	180330418	180331309	Active
chr1	180331519	180333508	Active
chr1	180482798	180484021	Active
chr1	180568165	180569517	Active
chr1	180570802	180571260	Active
chr1	180571386	180571595	Active
chr1	180640442	180642508	Active
chr1	180725614	180726682	Active
chr1	180812311	180812758	Active
chr1	180812987	180814728	Active
chr1	180847832	180848143	Active
chr1	180848402	180848991	Active
chr1	180849553	180850249	Active
chr1	180850343	180851576	Active
chr1	180892811	180893471	Active
chr1	180893564	180894247	Active
chr1	180902803	180903356	Active
chr1	180903791	180904952	Active
chr1	180905395	180907061	Active
chr1	180933555	180934099	Active
chr1	180934473	180935488	Active
chr1	180941832	180944118	Active
chr1	180944361	180945551	Active
chr1	181015625	181016385	Active
chr1	181016530	181017166	Active
chr1	181018374	181018714	Active
chr1	181143690	181144851	Active
chr1	181150383	181151540	Active
chr1	181210382	181212987	Active
chr1	181352008	181353158	Active
chr1	181353207	181353920	Active
chr1	181841389	181843220	Active
chr1	182018866	182020953	Active
chr1	182124411	182125517	Active
chr1	182281956	182283047	Active
chr1	182340841	182341772	Active
chr1	182408395	182409753	Active
chr1	182516792	182517996	Active
chr1	182763055	182765468	Active
chr1	183221092	183221774	Active
chr1	183296348	183297423	Active
chr1	183297492	183298626	Active
chr1	183368591	183370231	Active
chr1	183388446	183389287	Active
chr1	184033285	184035276	Active
chr1	184731541	184732530	Active
chr1	184810687	184811572	Active
chr1	184845234	184846319	Active
chr1	184846523	184847108	Active
chr1	184882014	184882356	Active
chr1	184882430	184883299	Active
chr1	184999087	185000155	Active
chr1	185000258	185000728	Active
chr1	185203204	185203681	Active
chr1	185203779	185204604	Active
chr1	185328682	185329493	Active
chr1	185329571	185329884	Active
chr1	185331945	185332601	Active
chr1	185362507	185363845	Active
chr1	185454511	185455840	Active
chr1	186116642	186117497	Active
chr1	186704222	186704772	Active
chr1	186705027	186706599	Active
chr1	186748885	186749736	Active
chr1	186967384	186968339	Active
chr1	187215196	187215948	Active
chr1	187608892	187610143	Active
chr1	189006841	189008270	Active
chr1	189343287	189344128	Active
chr1	189687708	189688577	Active
chr1	189727213	189729068	Active
chr1	189729406	189729664	Active
chr1	189729757	189730288	Active
chr1	189921391	189922806	Active
chr1	190168575	190169718	Active
chr1	190169967	190170880	Active
chr1	190910841	190912209	Active
chr1	190928140	190929627	Active
chr1	190978208	190978629	Active
chr1	190978716	190979789	Active
chr1	191024886	191027275	Active
chr1	191062527	191063483	Active
chr1	191098281	191099001	Active
chr1	191181823	191185318	Active
chr1	191223571	191225263	Active
chr1	191317463	191318335	Active
chr1	191325613	191326720	Active
chr1	191395945	191398086	Active
chr1	191574469	191574839	Active
chr1	191575098	191576206	Active
chr1	191717652	191719307	Active
chr1	191820746	191822589	Active
chr1	191905901	191908010	Active
chr1	192091906	192093236	Active
chr1	192136301	192139069	Active
chr1	192189951	192191099	Active
chr1	192191185	192191707	Active
chr1	192770506	192771287	Active
chr1	192833489	192834118	Active
chr1	192834548	192835062	Active
chr1	192835405	192835691	Active
chr1	192854358	192855946	Active
chr1	192856003	192856375	Active
chr1	193034558	193036761	Active
chr1	193129844	193130442	Active
chr1	193130523	193131591	Active
chr1	193152533	193154365	Active
chr1	193172947	193174105	Active
chr1	193272268	193273810	Active
chr1	193301918	193302525	Active
chr1	193507934	193509720	Active
chr1	193509955	193511394	Active
chr1	194619428	194620901	Active
chr1	194938498	194939337	Active
chr1	194975979	194977043	Active
chr1	194977205	194977460	Active
chr1	195091686	195093224	Active
chr1	195130868	195131686	Active
chr1	195176536	195177084	Active
chr2	3117276	3118987	Active
chr2	3282778	3283285	Active
chr2	3283392	3285162	Active
chr2	3331072	3331809	Active
chr2	3331962	3333332	Active
chr2	3335418	3336525	Active
chr2	3418789	3419400	Active
chr2	3423501	3424716	Active
chr2	3473943	3475907	Active
chr2	3511810	3513457	Active
chr2	3713093	3714330	Active
chr2	4400636	4401691	Active
chr2	4558837	4560062	Active
chr2	4651560	4652270	Active
chr2	4717196	4718742	Active
chr2	4880673	4882943	Active
chr2	4918794	4919358	Active
chr2	4919481	4919845	Active
chr2	5010585	5011327	Active
chr2	5012171	5013121	Active
chr2	5063403	5064489	Active
chr2	5137438	5138822	Active
chr2	5712677	5713214	Active
chr2	5713828	5716108	Active
chr2	5844537	5845711	Active
chr2	5894959	5895642	Active
chr2	5942094	5943298	Active
chr2	5950556	5952356	Active
chr2	6129525	6130461	Active
chr2	6212735	6213583	Active
chr2	6322102	6323562	Active
chr2	6871784	6873160	Active
chr2	9876883	9877121	Active
chr2	9877291	9877766	Active
chr2	9880869	9881438	Active
chr2	9882763	9883243	Active
chr2	9883428	9883871	Active
chr2	9888940	9889927	Active
chr2	10047707	10048839	Active
chr2	10079639	10080999	Active
chr2	10153239	10154049	Active
chr2	10369812	10370778	Active
chr2	10371893	10372703	Active
chr2	10372832	10373126	Active
chr2	10373360	10374192	Active
chr2	10374422	10375459	Active
chr2	10375734	10376119	Active
chr2	11172089	11172859	Active
chr2	11500724	11502686	Active
chr2	11502815	11504078	Active
chr2	11553004	11554316	Active
chr2	11601904	11603548	Active
chr2	11705111	11705454	Active
chr2	11705599	11706441	Active
chr2	11776882	11779302	Active
chr2	12301292	12302287	Active
chr2	12418425	12419735	Active
chr2	12923686	12924594	Active
chr2	13009610	13009877	Active
chr2	13009988	13011266	Active
chr2	13011474	13012012	Active
chr2	13270512	13271924	Active
chr2	13544223	13544977	Active
chr2	13573337	13575799	Active
chr2	13792610	13794173	Active
chr2	14054916	14056625	Active
chr2	14073407	14074986	Active
chr2	14603679	14605929	Active
chr2	15048959	15049793	Active
chr2	15054291	15056003	Active
chr2	16355579	16358101	Active
chr2	17730030	17730303	Active
chr2	17730679	17731778	Active
chr2	18025951	18027139	Active
chr2	18028041	18029126	Active
chr2	18031124	18032485	Active
chr2	18046821	18047267	Active
chr2	18047372	18048402	Active
chr2	18056043	18057450	Active
chr2	18057522	18057970	Active
chr2	18063736	18066065	Active
chr2	18391782	18393072	Active
chr2	18671789	18673173	Active
chr2	18676225	18676926	Active
chr2	18677026	18678170	Active
chr2	18996821	18997156	Active
chr2	18997396	18998996	Active
chr2	19199124	19199571	Active
chr2	19371224	19372488	Active
chr2	19444725	19446759	Active
chr2	19553352	19554539	Active
chr2	19657020	19659337	Active
chr2	20519277	20520448	Active
chr2	20967015	20967661	Active
chr2	20967798	20970165	Active
chr2	21205292	21206535	Active
chr2	22227316	22227896	Active
chr2	22621665	22622872	Active
chr2	22622963	22623983	Active
chr2	22774063	22775023	Active
chr2	22895056	22896303	Active
chr2	23039009	23040713	Active
chr2	23067546	23068822	Active
chr2	23068878	23069640	Active
chr2	23155345	23157042	Active
chr2	23571414	23572227	Active
chr2	24367482	24368153	Active
chr2	24385058	24385678	Active
chr2	24474263	24474802	Active
chr2	24474859	24475186	Active
chr2	24760939	24764093	Active
chr2	24918552	24919989	Active
chr2	24933938	24936228	Active
chr2	24949175	24950649	Active
chr2	24962011	24963039	Active
chr2	24974646	24975478	Active
chr2	24975607	24976547	Active
chr2	25054176	25054864	Active
chr2	25179504	25182384	Active
chr2	25194765	25196108	Active
chr2	25196239	25198383	Active
chr2	25209943	25210350	Active
chr2	25210666	25211676	Active
chr2	25212817	25214242	Active
chr2	25223231	25223599	Active
chr2	25223661	25225653	Active
chr2	25236379	25237026	Active
chr2	25240423	25241621	Active
chr2	25243673	25244185	Active
chr2	25254136	25256444	Active
chr2	25261125	25262021	Active
chr2	25262151	25263996	Active
chr2	25264711	25265171	Active
chr2	25271569	25271854	Active
chr2	25272919	25273462	Active
chr2	25332189	25333624	Active
chr2	25354793	25355452	Active
chr2	25355514	25357495	Active
chr2	25364265	25364582	Active
chr2	25365195	25365986	Active
chr2	25371321	25374204	Active
chr2	25395133	25396391	Active
chr2	25402003	25403817	Active
chr2	25425118	25425944	Active
chr2	25428310	25429344	Active
chr2	25459515	25461326	Active
chr2	25500626	25501279	Active
chr2	25501716	25502653	Active
chr2	25546086	25547283	Active
chr2	25557200	25559250	Active
chr2	25575692	25576075	Active
chr2	25576894	25580995	Active
chr2	25607744	25608727	Active
chr2	25621084	25622281	Active
chr2	25706443	25707604	Active
chr2	25877591	25878260	Active
chr2	25982182	25984639	Active
chr2	26021027	26022257	Active
chr2	26090705	26092454	Active
chr2	26121540	26122070	Active
chr2	26122166	26122962	Active
chr2	26139486	26141376	Active
chr2	26236688	26237739	Active
chr2	26315374	26316238	Active
chr2	26352269	26353049	Active
chr2	26380140	26380920	Active
chr2	26388339	26390151	Active
chr2	26407573	26409442	Active
chr2	26444677	26446465	Active
chr2	26446632	26447100	Active
chr2	26500661	26501405	Active
chr2	26501585	26502717	Active
chr2	26502877	26504156	Active
chr2	26504266	26504876	Active
chr2	26581748	26582444	Active
chr2	26585468	26586068	Active
chr2	26586179	26587453	Active
chr2	26587878	26588372	Active
chr2	26602787	26605227	Active
chr2	26627816	26629998	Active
chr2	26636764	26638189	Active
chr2	26638546	26639006	Active
chr2	26639650	26640932	Active
chr2	26901070	26901609	Active
chr2	26901828	26902247	Active
chr2	26902343	26903484	Active
chr2	26907527	26908799	Active
chr2	26910165	26912102	Active
chr2	26912198	26912721	Active
chr2	26913374	26914323	Active
chr2	26914531	26915394	Active
chr2	26917968	26918225	Active
chr2	26932720	26934438	Active
chr2	26964105	26964790	Active
chr2	27009185	27011015	Active
chr2	27027645	27028316	Active
chr2	27141874	27143049	Active
chr2	27425051	27427925	Active
chr2	27428039	27428393	Active
chr2	27441848	27443555	Active
chr2	27472462	27473060	Active
chr2	27473219	27473709	Active
chr2	27474031	27474532	Active
chr2	27474723	27476466	Active
chr2	27514097	27514352	Active
chr2	27514716	27516079	Active
chr2	27675873	27678220	Active
chr2	27885763	27888076	Active
chr2	28192342	28194234	Active
chr2	28204319	28205311	Active
chr2	28205379	28206487	Active
chr2	28446025	28447761	Active
chr2	28465638	28466797	Active
chr2	28467797	28469133	Active
chr2	28512612	28514341	Active
chr2	28514476	28515070	Active
chr2	28515536	28515894	Active
chr2	28532825	28534156	Active
chr2	28582384	28583422	Active
chr2	28583626	28584445	Active
chr2	28640625	28642095	Active
chr2	28699042	28700935	Active
chr2	28839345	28841333	Active
chr2	28908050	28908950	Active
chr2	29054233	29055323	Active
chr2	29060044	29060821	Active
chr2	29124478	29126211	Active
chr2	29251076	29251847	Active
chr2	29251877	29253827	Active
chr2	29346573	29347352	Active
chr2	29619475	29620523	Active
chr2	29750757	29752335	Active
chr2	29787433	29787999	Active
chr2	29788060	29788723	Active
chr2	29802346	29803408	Active
chr2	29803476	29804055	Active
chr2	29826809	29827694	Active
chr2	29845778	29846666	Active
chr2	29868952	29870608	Active
chr2	29888888	29891322	Active
chr2	29891591	29892221	Active
chr2	29934810	29935759	Active
chr2	29965047	29966425	Active
chr2	30048341	30049537	Active
chr2	30060966	30063903	Active
chr2	30076844	30081178	Active
chr2	30090399	30092055	Active
chr2	30092278	30092633	Active
chr2	30093153	30094257	Active
chr2	30094373	30094828	Active
chr2	30123897	30124957	Active
chr2	30133058	30134681	Active
chr2	30171332	30172407	Active
chr2	30177285	30177645	Active
chr2	30177814	30178814	Active
chr2	30205540	30206478	Active
chr2	30237048	30238472	Active
chr2	30265875	30266225	Active
chr2	30285685	30286953	Active
chr2	30358835	30359637	Active
chr2	30363840	30364868	Active
chr2	30365518	30366099	Active
chr2	30391658	30394047	Active
chr2	30415002	30416636	Active
chr2	30441164	30441925	Active
chr2	30442183	30443086	Active
chr2	30443327	30444297	Active
chr2	30471706	30472559	Active
chr2	30721003	30723055	Active
chr2	30800764	30802097	Active
chr2	30807125	30809119	Active
chr2	30826402	30826651	Active
chr2	30844695	30845057	Active
chr2	30845205	30845712	Active
chr2	30901570	30902072	Active
chr2	30902241	30903719	Active
chr2	30952567	30953665	Active
chr2	30966613	30966945	Active
chr2	30967269	30968070	Active
chr2	30981367	30983033	Active
chr2	31093818	31095134	Active
chr2	31140873	31142512	Active
chr2	31151992	31152916	Active
chr2	31244840	31247069	Active
chr2	31469407	31471376	Active
chr2	31471976	31472196	Active
chr2	31570402	31571238	Active
chr2	31571679	31573492	Active
chr2	31634921	31635875	Active
chr2	31635933	31637362	Active
chr2	31670191	31671245	Active
chr2	31687717	31689394	Active
chr2	31759369	31760502	Active
chr2	31809993	31811300	Active
chr2	31845301	31847509	Active
chr2	31949938	31950922	Active
chr2	31973866	31975133	Active
chr2	32082412	32083086	Active
chr2	32083297	32085204	Active
chr2	32095423	32096204	Active
chr2	32150118	32150500	Active
chr2	32151933	32152396	Active
chr2	32152620	32153613	Active
chr2	32235613	32237075	Active
chr2	32237166	32237655	Active
chr2	32258734	32260538	Active
chr2	32287271	32288964	Active
chr2	32316801	32319145	Active
chr2	32352296	32353527	Active
chr2	32361489	32361808	Active
chr2	32362724	32364020	Active
chr2	32380446	32382446	Active
chr2	32395220	32397056	Active
chr2	32423496	32424357	Active
chr2	32450934	32451788	Active
chr2	32451909	32453341	Active
chr2	32534214	32535984	Active
chr2	32536624	32537360	Active
chr2	32537486	32538994	Active
chr2	32570122	32571318	Active
chr2	32575284	32576232	Active
chr2	32586850	32588406	Active
chr2	32606386	32609620	Active
chr2	32624521	32625011	Active
chr2	32627119	32629897	Active
chr2	32630066	32630425	Active
chr2	32630445	32631612	Active
chr2	32646412	32647121	Active
chr2	32692408	32694730	Active
chr2	32711734	32714125	Active
chr2	32714789	32715642	Active
chr2	32727109	32727976	Active
chr2	32741121	32742976	Active
chr2	32756577	32757919	Active
chr2	32775297	32776536	Active
chr2	32776632	32777407	Active
chr2	32779016	32779954	Active
chr2	32846044	32846688	Active
chr2	32846838	32847496	Active
chr2	32875661	32878020	Active
chr2	32958875	32960366	Active
chr2	32960483	32963401	Active
chr2	32982792	32983188	Active
chr2	33128763	33129570	Active
chr2	33129673	33132066	Active
chr2	33215679	33216566	Active
chr2	33216644	33217827	Active
chr2	33370262	33371819	Active
chr2	33430593	33431969	Active
chr2	33467613	33468782	Active
chr2	33886464	33887996	Active
chr2	34371019	34373672	Active
chr2	34406430	34407313	Active
chr2	34753716	34754717	Active
chr2	34771197	34773064	Active
chr2	34799228	34800094	Active
chr2	34825671	34826955	Active
chr2	34870413	34871888	Active
chr2	34873759	34875027	Active
chr2	34912684	34913578	Active
chr2	34913674	34915489	Active
chr2	35108732	35110067	Active
chr2	35132017	35132583	Active
chr2	35200057	35201654	Active
chr2	35256192	35256848	Active
chr2	35264967	35266000	Active
chr2	35336146	35337617	Active
chr2	35460282	35461540	Active
chr2	35461752	35462656	Active
chr2	35581334	35583239	Active
chr2	35619326	35621127	Active
chr2	35621563	35622555	Active
chr2	35622980	35624462	Active
chr2	35691315	35692041	Active
chr2	35692147	35692668	Active
chr2	35978801	35980278	Active
chr2	36048506	36049877	Active
chr2	36104517	36106165	Active
chr2	36136210	36137113	Active
chr2	36230160	36231045	Active
chr2	37358355	37359596	Active
chr2	37359847	37360413	Active
chr2	37360639	37361466	Active
chr2	37422151	37423589	Active
chr2	37430261	37431478	Active
chr2	37442352	37443643	Active
chr2	37451855	37452774	Active
chr2	37452839	37453293	Active
chr2	37516730	37517358	Active
chr2	37775512	37776810	Active
chr2	38286477	38287771	Active
chr2	38287809	38288753	Active
chr2	38339040	38340040	Active
chr2	38350224	38352797	Active
chr2	38511414	38512720	Active
chr2	38643155	38644895	Active
chr2	38924976	38927005	Active
chr2	38927190	38928015	Active
chr2	38931373	38932721	Active
chr2	38996624	38997403	Active
chr2	38997712	38998626	Active
chr2	39004848	39005947	Active
chr2	39006345	39006912	Active
chr2	39007651	39009059	Active
chr2	39064965	39065857	Active
chr2	39189770	39191273	Active
chr2	39225876	39226734	Active
chr2	42652599	42653301	Active
chr2	44926134	44928099	Active
chr2	45108496	45109115	Active
chr2	45109178	45110273	Active
chr2	45110438	45110842	Active
chr2	45116458	45117587	Active
chr2	48813268	48814522	Active
chr2	48948598	48950734	Active
chr2	49450769	49453063	Active
chr2	49618981	49620163	Active
chr2	49787245	49788628	Active
chr2	50065787	50067067	Active
chr2	50295888	50296930	Active
chr2	51146757	51148838	Active
chr2	51148996	51149401	Active
chr2	51934499	51935254	Active
chr2	52071277	52071810	Active
chr2	52071890	52073565	Active
chr2	52073886	52074390	Active
chr2	52424241	52425168	Active
chr2	52674974	52677212	Active
chr2	52741609	52743392	Active
chr2	52857315	52859244	Active
chr2	53190477	53192817	Active
chr2	54084459	54084781	Active
chr2	54084915	54086008	Active
chr2	54435789	54437408	Active
chr2	55435726	55436937	Active
chr2	55437231	55437877	Active
chr2	57114075	57115701	Active
chr2	57116715	57117022	Active
chr2	57123141	57124585	Active
chr2	57181579	57182532	Active
chr2	57237031	57239480	Active
chr2	58356954	58358413	Active
chr2	58566262	58567796	Active
chr2	59159992	59162394	Active
chr2	59384228	59384973	Active
chr2	59385130	59385980	Active
chr2	59611123	59613722	Active
chr2	59882040	59882732	Active
chr2	60124696	60125775	Active
chr2	60209163	60210516	Active
chr2	60210720	60211693	Active
chr2	60283666	60284564	Active
chr2	60382824	60383637	Active
chr2	60552262	60553805	Active
chr2	60880773	60881984	Active
chr2	60961882	60963502	Active
chr2	61592782	61594063	Active
chr2	61711145	61712300	Active
chr2	62411119	62412438	Active
chr2	62663874	62664769	Active
chr2	63183841	63184359	Active
chr2	63184665	63185675	Active
chr2	64097828	64099209	Active
chr2	65021841	65023262	Active
chr2	65237530	65239619	Active
chr2	65845565	65845882	Active
chr2	66123653	66125354	Active
chr2	66255969	66257481	Active
chr2	66439767	66440895	Active
chr2	66634355	66635391	Active
chr2	68470799	68472877	Active
chr2	68860818	68862459	Active
chr2	69205657	69206499	Active
chr2	69584540	69584983	Active
chr2	69585165	69586512	Active
chr2	69586846	69587102	Active
chr2	69587838	69588357	Active
chr2	69646876	69647857	Active
chr2	69712926	69713751	Active
chr2	69722422	69723639	Active
chr2	69788982	69790178	Active
chr2	69790260	69790673	Active
chr2	69822343	69823577	Active
chr2	69860899	69861364	Active
chr2	69861449	69861968	Active
chr2	69885087	69885978	Active
chr2	69896942	69898695	Active
chr2	70473125	70474184	Active
chr2	70474397	70474882	Active
chr2	70475048	70475457	Active
chr2	70475548	70477387	Active
chr2	70508657	70510047	Active
chr2	70560878	70561699	Active
chr2	70563294	70564321	Active
chr2	70661002	70662153	Active
chr2	70824830	70826106	Active
chr2	71055117	71056359	Active
chr2	71117777	71118753	Active
chr2	71211258	71212588	Active
chr2	71366869	71368108	Active
chr2	71387095	71388250	Active
chr2	71388952	71389882	Active
chr2	71452985	71453706	Active
chr2	71528530	71530404	Active
chr2	71530994	71531614	Active
chr2	71540614	71542009	Active
chr2	71545351	71547261	Active
chr2	71718990	71720210	Active
chr2	71786531	71788307	Active
chr2	71872583	71874470	Active
chr2	71874931	71875506	Active
chr2	71980826	71981492	Active
chr2	72285237	72286397	Active
chr2	72475766	72477125	Active
chr2	72978546	72981182	Active
chr2	73213833	73214740	Active
chr2	73272757	73274850	Active
chr2	73311571	73313345	Active
chr2	73385960	73387226	Active
chr2	73484534	73485459	Active
chr2	73528506	73529951	Active
chr2	73585067	73585878	Active
chr2	73774779	73775917	Active
chr2	73891356	73893444	Active
chr2	73910303	73911885	Active
chr2	74578010	74579607	Active
chr2	74654905	74656557	Active
chr2	74667107	74669153	Active
chr2	74681559	74683992	Active
chr2	74696840	74698944	Active
chr2	74704036	74704577	Active
chr2	74704633	74706046	Active
chr2	74711691	74712645	Active
chr2	74752866	74753761	Active
chr2	74762597	74763791	Active
chr2	74825578	74826457	Active
chr2	75657155	75657715	Active
chr2	75657859	75660277	Active
chr2	75660397	75661345	Active
chr2	75703358	75705810	Active
chr2	75831647	75832845	Active
chr2	76338145	76339192	Active
chr2	76359703	76360718	Active
chr2	76369602	76370786	Active
chr2	76405958	76407595	Active
chr2	76647314	76649177	Active
chr2	76672328	76672807	Active
chr2	76672964	76673364	Active
chr2	76674695	76676604	Active
chr2	77169868	77170704	Active
chr2	77171636	77172509	Active
chr2	77279789	77281328	Active
chr2	77816204	77817466	Active
chr2	79255124	79256173	Active
chr2	79428461	79429027	Active
chr2	79454030	79454817	Active
chr2	79456581	79457038	Active
chr2	79634855	79636292	Active
chr2	80315158	80316170	Active
chr2	80446068	80447893	Active
chr2	80448247	80448736	Active
chr2	80580185	80581910	Active
chr2	80616645	80617673	Active
chr2	80638531	80639300	Active
chr2	82052620	82052983	Active
chr2	82053051	82053907	Active
chr2	83643764	83645108	Active
chr2	83723763	83725591	Active
chr2	83812321	83813458	Active
chr2	83940817	83941402	Active
chr2	84473353	84473829	Active
chr2	84474135	84474437	Active
chr2	84474520	84474991	Active
chr2	84504960	84505322	Active
chr2	84650482	84650882	Active
chr2	84658757	84659371	Active
chr2	84669859	84671130	Active
chr2	84677708	84679093	Active
chr2	84714320	84715786	Active
chr2	84715863	84716312	Active
chr2	84726924	84727883	Active
chr2	84733624	84734227	Active
chr2	84734344	84734689	Active
chr2	84739651	84740328	Active
chr2	84740512	84741462	Active
chr2	84741816	84743263	Active
chr2	84744225	84744815	Active
chr2	84774059	84775156	Active
chr2	84797920	84799323	Active
chr2	84826704	84827947	Active
chr2	84838296	84838666	Active
chr2	84839036	84839778	Active
chr2	84839895	84841322	Active
chr2	84886139	84887996	Active
chr2	84936505	84937078	Active
chr2	85036357	85038444	Active
chr2	85049305	85050182	Active
chr2	85050241	85051388	Active
chr2	90579443	90581490	Active
chr2	90744906	90746521	Active
chr2	90782619	90783743	Active
chr2	90846312	90847908	Active
chr2	90885391	90886160	Active
chr2	90904287	90904978	Active
chr2	90916879	90918299	Active
chr2	90939445	90941446	Active
chr2	91053665	91054909	Active
chr2	91068067	91071549	Active
chr2	91096695	91097445	Active
chr2	91182187	91183517	Active
chr2	91184078	91184489	Active
chr2	91194449	91195549	Active
chr2	91202153	91203349	Active
chr2	91236409	91237975	Active
chr2	91255249	91256299	Active
chr2	91256428	91258416	Active
chr2	91263070	91266091	Active
chr2	91444339	91444766	Active
chr2	91456990	91458172	Active
chr2	91458220	91458508	Active
chr2	91458711	91459473	Active
chr2	91526504	91527707	Active
chr2	91635019	91635363	Active
chr2	91635677	91635962	Active
chr2	91636300	91636576	Active
chr2	91648958	91650811	Active
chr2	91709870	91711259	Active
chr2	91729914	91730855	Active
chr2	91920944	91921382	Active
chr2	91930993	91932170	Active
chr2	91932236	91934055	Active
chr2	91934297	91934731	Active
chr2	91949786	91949994	Active
chr2	91950527	91951083	Active
chr2	91961780	91962389	Active
chr2	91962986	91964262	Active
chr2	92023202	92024798	Active
chr2	92182750	92184003	Active
chr2	92185155	92186014	Active
chr2	92370323	92371816	Active
chr2	92371997	92373148	Active
chr2	92373688	92374035	Active
chr2	92374617	92376776	Active
chr2	92387583	92388535	Active
chr2	92388680	92390120	Active
chr2	92391709	92393391	Active
chr2	92433444	92434571	Active
chr2	92459326	92459984	Active
chr2	92460110	92460776	Active
chr2	92914439	92915655	Active
chr2	93045274	93047667	Active
chr2	93187206	93188114	Active
chr2	93188367	93189294	Active
chr2	93333405	93333888	Active
chr2	93333947	93334574	Active
chr2	93462036	93463188	Active
chr2	93642237	93643812	Active
chr2	93821708	93822827	Active
chr2	93849075	93850141	Active
chr2	93868570	93869981	Active
chr2	93954671	93955036	Active
chr2	93955968	93957418	Active
chr2	94010353	94011632	Active
chr2	94157282	94158610	Active
chr2	94405940	94406952	Active
chr2	94437375	94438689	Active
chr2	97465702	97467226	Active
chr2	101628555	101629193	Active
chr2	101678007	101679840	Active
chr2	101795986	101798100	Active
chr2	101885853	101886721	Active
chr2	102185214	102185773	Active
chr2	102185899	102186910	Active
chr2	102400155	102401775	Active
chr2	102450170	102452548	Active
chr2	102549342	102550324	Active
chr2	102658621	102659718	Active
chr2	102900751	102901431	Active
chr2	103072914	103074238	Active
chr2	103484397	103485390	Active
chr2	103565087	103565600	Active
chr2	103565916	103567675	Active
chr2	103760397	103762178	Active
chr2	103795536	103798292	Active
chr2	103810343	103810865	Active
chr2	103969336	103969865	Active
chr2	103969960	103971272	Active
chr2	104027395	104028946	Active
chr2	104069699	104070111	Active
chr2	104095724	104096744	Active
chr2	104122422	104123473	Active
chr2	104409666	104410845	Active
chr2	104492955	104494867	Active
chr2	104588012	104589047	Active
chr2	104589616	104591255	Active
chr2	104711219	104712839	Active
chr2	104815551	104817687	Active
chr2	104847719	104848345	Active
chr2	104849217	104850218	Active
chr2	104851597	104852084	Active
chr2	104885991	104886869	Active
chr2	105016244	105017528	Active
chr2	105122747	105123391	Active
chr2	105125932	105128326	Active
chr2	105133998	105135131	Active
chr2	105224075	105225033	Active
chr2	105398430	105400146	Active
chr2	105659826	105660459	Active
chr2	105660649	105661097	Active
chr2	105668239	105669105	Active
chr2	105669339	105669906	Active
chr2	105669971	105670327	Active
chr2	105671677	105672479	Active
chr2	105673492	105674380	Active
chr2	105674530	105675844	Active
chr2	105675971	105677006	Active
chr2	105677304	105678230	Active
chr2	105680030	105680925	Active
chr2	105681103	105681741	Active
chr2	105903674	105905079	Active
chr2	106002677	106003576	Active
chr2	106650208	106650553	Active
chr2	106692756	106694730	Active
chr2	106694800	106696211	Active
chr2	106973243	106973910	Active
chr2	106974015	106974621	Active
chr2	109277946	109278411	Active
chr2	109280431	109281548	Active
chr2	109673170	109674503	Active
chr2	109674769	109675270	Active
chr2	109675797	109676500	Active
chr2	109676963	109677897	Active
chr2	109677985	109678419	Active
chr2	109692968	109694357	Active
chr2	109694810	109695207	Active
chr2	109723502	109724014	Active
chr2	109890519	109891394	Active
chr2	109913190	109913966	Active
chr2	109916894	109918501	Active
chr2	109918552	109919137	Active
chr2	110017507	110018448	Active
chr2	110362207	110363306	Active
chr2	110949995	110950682	Active
chr2	112239081	112240514	Active
chr2	112261592	112262358	Active
chr2	112264971	112266537	Active
chr2	112284325	112284849	Active
chr2	112367135	112368435	Active
chr2	112375055	112376114	Active
chr2	112377000	112378200	Active
chr2	112378784	112379724	Active
chr2	112454553	112455589	Active
chr2	112492433	112494116	Active
chr2	113216481	113217572	Active
chr2	113327270	113328198	Active
chr2	113440254	113441536	Active
chr2	113828187	113829535	Active
chr2	113847690	113849245	Active
chr2	114012656	114014074	Active
chr2	114174877	114175478	Active
chr2	114200920	114201683	Active
chr2	114654264	114655275	Active
chr2	115581102	115582590	Active
chr2	116062896	116063563	Active
chr2	116063773	116064024	Active
chr2	116064117	116064841	Active
chr2	116065530	116065874	Active
chr2	116066192	116066581	Active
chr2	116066897	116067504	Active
chr2	117118941	117122238	Active
chr2	117249327	117250602	Active
chr2	117341740	117342913	Active
chr2	117343086	117343733	Active
chr2	118109420	118110896	Active
chr2	118110978	118112286	Active
chr2	118256490	118257162	Active
chr2	118372687	118374554	Active
chr2	118388057	118389326	Active
chr2	118478895	118480029	Active
chr2	118544223	118544926	Active
chr2	118545065	118546194	Active
chr2	118548185	118550044	Active
chr2	118597440	118598705	Active
chr2	118662743	118663187	Active
chr2	118663290	118663795	Active
chr2	118663859	118664717	Active
chr2	118676635	118677761	Active
chr2	118701614	118704347	Active
chr2	118745271	118746968	Active
chr2	118761941	118762287	Active
chr2	118764066	118764460	Active
chr2	118813594	118815105	Active
chr2	118861767	118862285	Active
chr2	118899798	118900644	Active
chr2	118901172	118903285	Active
chr2	118926316	118927655	Active
chr2	119028868	119029759	Active
chr2	119034459	119035677	Active
chr2	119046632	119047823	Active
chr2	119112284	119113427	Active
chr2	119156143	119157440	Active
chr2	119166727	119168347	Active
chr2	119207923	119209456	Active
chr2	119236578	119238393	Active
chr2	119238535	119239298	Active
chr2	119270013	119271415	Active
chr2	119288017	119289469	Active
chr2	119321391	119323645	Active
chr2	119350588	119351629	Active
chr2	119353118	119354617	Active
chr2	119476640	119478749	Active
chr2	119546800	119548222	Active
chr2	119593692	119593977	Active
chr2	119594098	119594903	Active
chr2	119617856	119619194	Active
chr2	119662591	119663311	Active
chr2	119674121	119675764	Active
chr2	119740954	119743500	Active
chr2	119744680	119745164	Active
chr2	119757812	119759038	Active
chr2	119759308	119759906	Active
chr2	119787147	119788186	Active
chr2	119799087	119800700	Active
chr2	119800818	119802025	Active
chr2	119896605	119897821	Active
chr2	119897879	119898644	Active
chr2	119972083	119972684	Active
chr2	119972840	119973096	Active
chr2	120026961	120027648	Active
chr2	120027991	120028391	Active
chr2	120153487	120155034	Active
chr2	120352585	120353325	Active
chr2	120403566	120405092	Active
chr2	120563165	120564375	Active
chr2	120567245	120568545	Active
chr2	120608619	120609992	Active
chr2	120628843	120629941	Active
chr2	120729826	120730105	Active
chr2	120730255	120730627	Active
chr2	120730764	120732326	Active
chr2	120849783	120850772	Active
chr2	120850873	120851186	Active
chr2	120970386	120971124	Active
chr2	120976957	120978125	Active
chr2	121007777	121009005	Active
chr2	121139253	121140945	Active
chr2	121170474	121171844	Active
chr2	121270412	121271837	Active
chr2	121289079	121290908	Active
chr2	121294043	121295056	Active
chr2	121295146	121295711	Active
chr2	121357494	121357891	Active
chr2	121357913	121359145	Active
chr2	121413091	121414673	Active
chr2	121441288	121443120	Active
chr2	121447605	121451194	Active
chr2	121456802	121457797	Active
chr2	121509434	121509938	Active
chr2	121806166	121807714	Active
chr2	121866507	121867895	Active
chr2	121955442	121957260	Active
chr2	122027900	122029285	Active
chr2	122029373	122029658	Active
chr2	122117459	122118944	Active
chr2	122147436	122148326	Active
chr2	122186174	122186698	Active
chr2	122234519	122235369	Active
chr2	122367193	122367812	Active
chr2	122368127	122369987	Active
chr2	122370110	122371078	Active
chr2	122467061	122468202	Active
chr2	122610798	122611622	Active
chr2	122630271	122631873	Active
chr2	122637393	122638159	Active
chr2	122701902	122703108	Active
chr2	122738047	122739013	Active
chr2	122764984	122765783	Active
chr2	124609632	124611256	Active
chr2	125123108	125123848	Active
chr2	125124036	125124680	Active
chr2	125125155	125125522	Active
chr2	125246032	125246637	Active
chr2	125247072	125248650	Active
chr2	125505076	125507334	Active
chr2	125624528	125625562	Active
chr2	125672923	125673674	Active
chr2	125723765	125725265	Active
chr2	125781965	125783695	Active
chr2	125858293	125859481	Active
chr2	126151737	126152511	Active
chr2	126552079	126554075	Active
chr2	126674296	126676688	Active
chr2	126706738	126707829	Active
chr2	126875456	126877005	Active
chr2	126932356	126933658	Active
chr2	127008335	127009081	Active
chr2	127070116	127071243	Active
chr2	127133343	127134495	Active
chr2	127141807	127142590	Active
chr2	127143121	127143915	Active
chr2	127207651	127208923	Active
chr2	127246106	127246663	Active
chr2	127246960	127248931	Active
chr2	127269534	127271076	Active
chr2	127335993	127336843	Active
chr2	127362527	127364034	Active
chr2	127364128	127364502	Active
chr2	127425061	127425797	Active
chr2	127444385	127444735	Active
chr2	127480134	127481336	Active
chr2	127481590	127483774	Active
chr2	127521073	127522603	Active
chr2	127541046	127541754	Active
chr2	127584242	127585050	Active
chr2	127586794	127587835	Active
chr2	127788426	127789136	Active
chr2	127790414	127791239	Active
chr2	127792004	127792804	Active
chr2	127831299	127832260	Active
chr2	128123085	128123495	Active
chr2	128125040	128125319	Active
chr2	128125413	128128281	Active
chr2	128427899	128428754	Active
chr2	128686756	128687718	Active
chr2	128697806	128699944	Active
chr2	128817431	128819201	Active
chr2	128863631	128864450	Active
chr2	128943427	128944382	Active
chr2	128966826	128968385	Active
chr2	129065384	129066395	Active
chr2	129066486	129066755	Active
chr2	129100089	129101338	Active
chr2	129129204	129130017	Active
chr2	129130154	129130478	Active
chr2	129197979	129199270	Active
chr2	129199365	129200615	Active
chr2	129296761	129297963	Active
chr2	129592438	129594371	Active
chr2	129799831	129802102	Active
chr2	130178863	130179971	Active
chr2	130273815	130275377	Active
chr2	130276104	130276693	Active
chr2	130276806	130277286	Active
chr2	130277930	130278162	Active
chr2	130278260	130278830	Active
chr2	130283437	130284602	Active
chr2	130294664	130296374	Active
chr2	130296418	130296908	Active
chr2	130396963	130398322	Active
chr2	130423327	130424983	Active
chr2	130449910	130450873	Active
chr2	130563211	130564473	Active
chr2	130629146	130630213	Active
chr2	130642095	130643819	Active
chr2	130662999	130665002	Active
chr2	130667038	130668499	Active
chr2	130696248	130698022	Active
chr2	130698129	130698447	Active
chr2	130698519	130699046	Active
chr2	130838921	130839423	Active
chr2	130839700	130840703	Active
chr2	130906002	130907194	Active
chr2	131040243	131042435	Active
chr2	131044315	131045224	Active
chr2	131126601	131127899	Active
chr2	131158490	131159244	Active
chr2	131159281	131161141	Active
chr2	131177107	131177531	Active
chr2	131177605	131178256	Active
chr2	131178377	131179075	Active
chr2	131179250	131180685	Active
chr2	131186231	131187628	Active
chr2	131209257	131211034	Active
chr2	131233201	131234557	Active
chr2	131261762	131263206	Active
chr2	131352059	131353272	Active
chr2	131491495	131492694	Active
chr2	131561111	131561767	Active
chr2	131561827	131563453	Active
chr2	131846068	131846870	Active
chr2	131847027	131848416	Active
chr2	131909687	131910666	Active
chr2	132027678	132028283	Active
chr2	132028930	132031199	Active
chr2	132144080	132145541	Active
chr2	132145641	132146045	Active
chr2	132246002	132246677	Active
chr2	132247376	132248189	Active
chr2	132252209	132253589	Active
chr2	132262542	132264096	Active
chr2	132284048	132284427	Active
chr2	132285076	132285639	Active
chr2	132286336	132286899	Active
chr2	132577338	132578628	Active
chr2	132686698	132687358	Active
chr2	132690833	132691505	Active
chr2	132781161	132782173	Active
chr2	132815553	132816568	Active
chr2	132846186	132847362	Active
chr2	132878905	132880260	Active
chr2	132880439	132881649	Active
chr2	132944715	132946303	Active
chr2	133551801	133553643	Active
chr2	133554187	133555114	Active
chr2	134643101	134644530	Active
chr2	134785856	134787256	Active
chr2	135657534	135658119	Active
chr2	135658206	135660102	Active
chr2	135764305	135765161	Active
[truncated: 18,742 more rows]

## Sheet: Supplementary Table 2e
Chr	Start	End	Sort
chr1	4571251	4572181	Active
chr1	4802460	4802869	Active
chr1	4803046	4803432	Active
chr1	4855252	4856285	Active
chr1	5232822	5233380	Active
chr1	5261806	5262132	Active
chr1	6382753	6383203	Active
chr1	6448776	6449480	Active
chr1	7047302	7047864	Active
chr1	7053227	7053841	Active
chr1	7206027	7206542	Active
chr1	7312041	7312981	Active
chr1	7671279	7672327	Active
chr1	8925352	8926045	Active
chr1	9469269	9470453	Active
chr1	9966713	9968518	Active
chr1	10031378	10032323	Active
chr1	10284649	10285575	Active
chr1	11277717	11278357	Active
chr1	11330066	11330538	Active
chr1	11395385	11396289	Active
chr1	11400869	11401610	Active
chr1	12690658	12691296	Active
chr1	12711263	12712022	Active
chr1	12744467	12745535	Active
chr1	12807852	12808425	Active
chr1	12808609	12809090	Active
chr1	12835992	12836378	Active
chr1	12864916	12865507	Active
chr1	13069355	13069955	Active
chr1	13074503	13075075	Active
chr1	13080652	13081489	Active
chr1	13083803	13084344	Active
chr1	13084455	13086020	Active
chr1	13103162	13104585	Active
chr1	13133196	13133972	Active
chr1	13134078	13134678	Active
chr1	13426359	13427222	Active
chr1	13619388	13619817	Active
chr1	14292082	14292739	Active
chr1	14506198	14507718	Active
chr1	15285947	15287406	Active
chr1	15791177	15791514	Active
chr1	15791632	15792202	Active
chr1	16129459	16130759	Active
chr1	17207404	17208086	Active
chr1	17250602	17251296	Active
chr1	18057602	18058911	Active
chr1	20867417	20867952	Active
chr1	20868253	20868640	Active
chr1	21255538	21257205	Active
chr1	22533055	22534326	Active
chr1	25012604	25013293	Active
chr1	30867761	30868164	Active
chr1	33635895	33637164	Active
chr1	33637565	33638424	Active
chr1	33741254	33742205	Active
chr1	33742603	33743302	Active
chr1	33903527	33903854	Active
chr1	34041139	34041706	Active
chr1	34067638	34068191	Active
chr1	34073485	34074447	Active
chr1	34074453	34075374	Active
chr1	34076917	34077888	Active
chr1	34103290	34104437	Active
chr1	34106869	34107514	Active
chr1	34109980	34110574	Active
chr1	34139053	34139975	Active
chr1	34140150	34140587	Active
chr1	34140648	34141130	Active
chr1	34235978	34236942	Active
chr1	34432758	34433681	Active
chr1	34434652	34435383	Active
chr1	34467987	34468794	Active
chr1	34750339	34751203	Active
chr1	35231990	35233009	Active
chr1	35697702	35698353	Active
chr1	35943853	35945248	Active
chr1	36013607	36014597	Active
chr1	36016793	36017648	Active
chr1	36018159	36019384	Active
chr1	36054618	36055609	Active
chr1	36064358	36065447	Active
chr1	36066029	36066574	Active
chr1	36074642	36075736	Active
chr1	36089539	36089937	Active
chr1	36103396	36104815	Active
chr1	36314301	36315307	Active
chr1	36315481	36316499	Active
chr1	36579717	36581110	Active
chr1	36784594	36785746	Active
chr1	36844972	36845540	Active
chr1	36853855	36854621	Active
chr1	36903024	36904445	Active
chr1	36982129	36983225	Active
chr1	36983580	36984100	Active
chr1	36984278	36984835	Active
chr1	36985429	36986316	Active
chr1	36986651	36987217	Active
chr1	36987498	36987835	Active
chr1	36988089	36988971	Active
chr1	37101621	37102249	Active
chr1	37129791	37130377	Active
chr1	38058348	38059040	Active
chr1	38823777	38824480	Active
chr1	39527379	39527892	Active
chr1	39530250	39530957	Active
chr1	39761961	39762536	Active
chr1	39772023	39772992	Active
chr1	39859211	39860179	Active
chr1	39905920	39906468	Active
chr1	39906933	39907766	Active
chr1	39949846	39950579	Active
chr1	41131345	41131864	Active
chr1	42058258	42058855	Active
chr1	42684243	42685254	Active
chr1	42686157	42687102	Active
chr1	43571055	43571575	Active
chr1	43882742	43883351	Active
chr1	46894186	46895071	Active
chr1	47076432	47077049	Active
chr1	51509012	51509425	Active
chr1	51747442	51747950	Active
chr1	51878966	51879836	Active
chr1	51931554	51931985	Active
chr1	52113451	52114077	Active
chr1	52149978	52150370	Active
chr1	53581229	53581987	Active
chr1	53823768	53824072	Active
chr1	54584352	54585816	Active
chr1	55107031	55107806	Active
chr1	55108151	55109467	Active
chr1	55163781	55164490	Active
chr1	55198552	55199356	Active
chr1	58366537	58367481	Active
chr1	59375859	59376993	Active
chr1	59377176	59377715	Active
chr1	59422418	59423904	Active
chr1	59426954	59427454	Active
chr1	59448219	59449881	Active
chr1	59450526	59451316	Active
chr1	59487615	59488045	Active
chr1	59584655	59585002	Active
chr1	59603803	59604420	Active
chr1	59606391	59607457	Active
chr1	59696864	59697396	Active
chr1	59697852	59698378	Active
chr1	59728594	59728865	Active
chr1	59729076	59729451	Active
chr1	59912281	59914303	Active
chr1	60432543	60432970	Active
chr1	60839257	60839554	Active
chr1	60850906	60851508	Active
chr1	60852624	60854421	Active
chr1	60857473	60858315	Active
chr1	62181418	62182297	Active
chr1	62397671	62398798	Active
chr1	62664830	62665309	Active
chr1	62665396	62665809	Active
chr1	62704691	62705459	Active
chr1	62705781	62707190	Active
chr1	62707405	62708335	Active
chr1	62708438	62708776	Active
chr1	62710106	62710556	Active
chr1	62735962	62736444	Active
chr1	62736696	62737186	Active
chr1	62737904	62738677	Active
chr1	62741907	62742935	Active
chr1	62743048	62743903	Active
chr1	62773366	62774112	Active
chr1	62775984	62776669	Active
chr1	62778698	62779444	Active
chr1	62781856	62782988	Active
chr1	62783110	62785335	Active
chr1	62794030	62794922	Active
chr1	62795377	62796096	Active
chr1	63107669	63108216	Active
chr1	63109966	63110399	Active
chr1	63110599	63110812	Active
chr1	63110986	63111135	Active
chr1	63118135	63119043	Active
chr1	63130051	63130841	Active
chr1	63138044	63139535	Active
chr1	63139698	63140542	Active
chr1	63204131	63204748	Active
chr1	63210025	63210731	Active
chr1	63225930	63226239	Active
chr1	63247043	63247367	Active
chr1	63248002	63249278	Active
chr1	63322241	63322730	Active
chr1	63323424	63324142	Active
chr1	63441035	63441581	Active
chr1	63442261	63442794	Active
chr1	64225925	64226626	Active
chr1	64301165	64302224	Active
chr1	64305087	64305993	Active
chr1	64694710	64695499	Active
chr1	64731316	64731887	Active
chr1	64732151	64733341	Active
chr1	65109800	65110482	Active
chr1	71035456	71035894	Active
chr1	71609165	71609924	Active
chr1	71610904	71611463	Active
chr1	71643210	71643996	Active
chr1	71644919	71645887	Active
chr1	71646074	71646499	Active
chr1	71673361	71674477	Active
chr1	72172808	72173111	Active
chr1	72173716	72174204	Active
chr1	72182968	72183554	Active
chr1	72202228	72202775	Active
chr1	72203175	72203381	Active
chr1	72204854	72205995	Active
chr1	72207117	72207738	Active
chr1	72216636	72217881	Active
chr1	72219228	72219604	Active
chr1	72220000	72220590	Active
chr1	72232832	72233381	Active
chr1	72312289	72312600	Active
chr1	72313123	72313738	Active
chr1	72490707	72491323	Active
chr1	72593430	72593872	Active
chr1	72805612	72806664	Active
chr1	72812798	72813235	Active
chr1	72870904	72871349	Active
chr1	72960107	72960916	Active
chr1	72963169	72964202	Active
chr1	73966290	73967438	Active
chr1	74027476	74028365	Active
chr1	74068191	74069098	Active
chr1	74092366	74092626	Active
chr1	74092710	74093203	Active
chr1	74097970	74099285	Active
chr1	74102866	74104518	Active
chr1	74110852	74111998	Active
chr1	74256877	74257321	Active
chr1	74294783	74296423	Active
chr1	74296501	74297047	Active
chr1	74297117	74297769	Active
chr1	74367567	74368661	Active
chr1	74386636	74387439	Active
chr1	74397228	74398510	Active
chr1	74783635	74784762	Active
chr1	74806148	74808726	Active
chr1	74816330	74817521	Active
chr1	74824435	74825389	Active
chr1	75214393	75214803	Active
chr1	75214933	75215427	Active
chr1	75244135	75245347	Active
chr1	75248126	75248767	Active
chr1	75250555	75251145	Active
chr1	75251346	75252500	Active
chr1	75343926	75344969	Active
chr1	75345079	75345432	Active
chr1	75345548	75346512	Active
chr1	75347401	75347923	Active
chr1	75386953	75390112	Active
chr1	75426711	75427847	Active
chr1	75442222	75442903	Active
chr1	75458144	75458907	Active
chr1	75486796	75488238	Active
chr1	75491735	75493214	Active
chr1	75518026	75518461	Active
chr1	75558456	75559908	Active
chr1	75587758	75589642	Active
chr1	75704872	75705208	Active
chr1	75888235	75888658	Active
chr1	77446413	77447421	Active
chr1	77473318	77473635	Active
chr1	77473997	77474229	Active
chr1	77496715	77497170	Active
chr1	77514906	77516890	Active
chr1	78215733	78218496	Active
chr1	78602005	78602610	Active
chr1	79581125	79581883	Active
chr1	80237032	80237741	Active
chr1	80314531	80315130	Active
chr1	81593318	81594286	Active
chr1	82282810	82283815	Active
chr1	82286939	82287685	Active
chr1	82834361	82834848	Active
chr1	82948684	82949857	Active
chr1	84404724	84405526	Active
chr1	84848471	84849295	Active
chr1	84849976	84850595	Active
chr1	84850766	84851156	Active
chr1	84860591	84861573	Active
chr1	84866306	84868356	Active
chr1	84868719	84870014	Active
chr1	84871512	84871806	Active
chr1	84872040	84872781	Active
chr1	84881353	84882968	Active
chr1	84883029	84883462	Active
chr1	84887265	84888117	Active
chr1	84889129	84890958	Active
chr1	85703400	85703868	Active
chr1	86018175	86019092	Active
chr1	86059376	86060052	Active
chr1	86060277	86061114	Active
chr1	86186597	86187463	Active
chr1	86188693	86189844	Active
chr1	86236247	86237193	Active
chr1	86294304	86295097	Active
chr1	86307758	86308640	Active
chr1	86308713	86310014	Active
chr1	86310503	86311881	Active
chr1	86313367	86314191	Active
chr1	86421054	86421485	Active
chr1	86429263	86430474	Active
chr1	86432437	86433070	Active
chr1	86433927	86435233	Active
chr1	86436365	86437173	Active
chr1	86437846	86438939	Active
chr1	86439553	86441042	Active
chr1	86441506	86444803	Active
chr1	86449950	86450465	Active
chr1	86450580	86451081	Active
chr1	86467067	86467943	Active
chr1	86480621	86481443	Active
chr1	86481586	86482085	Active
chr1	86487025	86488340	Active
chr1	86488716	86489253	Active
chr1	86491738	86492852	Active
chr1	86496765	86497659	Active
chr1	86497690	86498537	Active
chr1	86498611	86499295	Active
chr1	86499571	86500499	Active
chr1	86500953	86501856	Active
chr1	86502204	86502910	Active
chr1	86505412	86506033	Active
chr1	86506111	86507070	Active
chr1	86507290	86508357	Active
chr1	86508827	86510095	Active
chr1	86510223	86510604	Active
chr1	86511204	86511600	Active
chr1	86511709	86512413	Active
chr1	86519889	86520779	Active
chr1	86521642	86521979	Active
chr1	86530848	86531340	Active
chr1	86531509	86533004	Active
chr1	86647488	86648004	Active
chr1	87225803	87226947	Active
chr1	87229888	87230359	Active
chr1	87230580	87231205	Active
chr1	88464020	88465025	Active
chr1	88465594	88466180	Active
chr1	88466632	88467352	Active
chr1	88605489	88606488	Active
chr1	88608270	88608690	Active
chr1	88668297	88669698	Active
chr1	88705671	88706741	Active
chr1	89093619	89094312	Active
chr1	89095755	89096964	Active
chr1	89102234	89102875	Active
chr1	89103979	89104989	Active
chr1	89182829	89183898	Active
chr1	89191103	89192223	Active
chr1	89576718	89577469	Active
chr1	89579873	89581655	Active
chr1	89581749	89582056	Active
chr1	89756376	89756988	Active
chr1	89763789	89764269	Active
chr1	89872661	89873403	Active
chr1	89876018	89877028	Active
chr1	89921800	89922686	Active
chr1	89923214	89924180	Active
chr1	89935465	89936460	Active
chr1	89939305	89939728	Active
chr1	89939916	89940706	Active
chr1	89941595	89942496	Active
chr1	89967623	89968871	Active
chr1	90424101	90424845	Active
chr1	91533674	91535024	Active
chr1	91537569	91538430	Active
chr1	91600576	91601360	Active
chr1	91816555	91817300	Active
chr1	91919379	91920651	Active
chr1	91928902	91929607	Active
chr1	92348306	92349146	Active
chr1	92431322	92431911	Active
chr1	92432102	92432561	Active
chr1	92436188	92437029	Active
chr1	92437439	92438188	Active
chr1	92854836	92855886	Active
chr1	93173834	93175035	Active
chr1	93176353	93177623	Active
chr1	93210115	93210565	Active
chr1	93223904	93224422	Active
chr1	93227285	93228024	Active
chr1	93667714	93668297	Active
chr1	93668675	93669507	Active
chr1	93834611	93835840	Active
chr1	94034865	94035620	Active
chr1	97768738	97770753	Active
chr1	105012689	105013689	Active
chr1	105522260	105523483	Active
chr1	106407157	106407769	Active
chr1	114849484	114850115	Active
chr1	117457692	117458114	Active
chr1	118642580	118644171	Active
chr1	118645448	118646207	Active
chr1	118649063	118649416	Active
chr1	118649782	118650864	Active
chr1	118652204	118653103	Active
chr1	118686795	118688436	Active
chr1	118981511	118982081	Active
chr1	119003991	119004439	Active
chr1	119004672	119005144	Active
chr1	119010229	119011074	Active
chr1	119047477	119048238	Active
chr1	119048464	119048788	Active
chr1	119064108	119064670	Active
chr1	119065092	119065521	Active
chr1	119074883	119075815	Active
chr1	119075889	119076371	Active
chr1	119076834	119077598	Active
chr1	119077862	119078550	Active
chr1	119081977	119082839	Active
chr1	119083557	119083912	Active
chr1	119166081	119166962	Active
chr1	119299088	119300409	Active
chr1	119301101	119301604	Active
chr1	119301792	119303294	Active
chr1	119304177	119304936	Active
chr1	119345223	119345889	Active
chr1	119347395	119347880	Active
chr1	119348105	119348754	Active
chr1	119348827	119349890	Active
chr1	119388733	119390167	Active
chr1	119397414	119398484	Active
chr1	119398517	119399415	Active
chr1	119404315	119405369	Active
chr1	119453741	119454227	Active
chr1	119496867	119498002	Active
chr1	119634714	119635155	Active
chr1	119996894	119997531	Active
chr1	120083768	120084442	Active
chr1	120085556	120086249	Active
chr1	120086477	120087339	Active
chr1	120258422	120259050	Active
chr1	120644116	120645078	Active
chr1	121177750	121178296	Active
chr1	122607340	122608061	Active
chr1	125729464	125729996	Active
chr1	127238798	127239303	Active
chr1	127904706	127905220	Active
chr1	127990153	127990939	Active
chr1	128099720	128100916	Active
chr1	128392009	128392952	Active
chr1	128471971	128473305	Active
chr1	128859945	128860802	Active
chr1	130737345	130738166	Active
chr1	131107475	131108624	Active
chr1	131149186	131149952	Active
chr1	131160694	131161826	Active
chr1	131658035	131658480	Active
chr1	131690489	131691128	Active
chr1	131890077	131891222	Active
chr1	131977726	131978477	Active
chr1	132151006	132152272	Active
chr1	132157085	132157855	Active
chr1	132158150	132158636	Active
chr1	132159445	132159897	Active
chr1	132211790	132212847	Active
chr1	132237651	132238237	Active
chr1	132263753	132264555	Active
chr1	132264630	132265829	Active
chr1	132268623	132269584	Active
chr1	132288094	132288862	Active
chr1	132292764	132293414	Active
chr1	132322628	132323296	Active
chr1	132354632	132355328	Active
chr1	132586361	132587341	Active
chr1	132703425	132704082	Active
chr1	132850582	132851417	Active
chr1	132980626	132980890	Active
chr1	132982422	132982751	Active
chr1	133018806	133019807	Active
chr1	133020203	133020785	Active
chr1	133079672	133080518	Active
chr1	133083817	133084758	Active
chr1	133163692	133164515	Active
chr1	133180926	133182127	Active
chr1	133182239	133182988	Active
chr1	133366506	133367127	Active
chr1	133367335	133368276	Active
chr1	133368447	133368812	Active
chr1	133379467	133380169	Active
chr1	133382597	133383837	Active
chr1	133384316	133384685	Active
chr1	133385438	133385825	Active
chr1	133385900	133386241	Active
chr1	133386319	133387455	Active
chr1	133387797	133388203	Active
chr1	133392760	133393381	Active
chr1	133393493	133394220	Active
chr1	133397378	133398106	Active
chr1	133398675	133399067	Active
chr1	133413637	133414638	Active
chr1	133415339	133415820	Active
chr1	133418051	133418640	Active
chr1	133433939	133434897	Active
chr1	133434972	133435446	Active
chr1	133448290	133448852	Active
chr1	133492430	133493856	Active
chr1	133663732	133664477	Active
chr1	133664666	133665121	Active
chr1	133667550	133668103	Active
chr1	133669906	133670833	Active
chr1	133695035	133695491	Active
chr1	133695882	133696239	Active
chr1	133709210	133710392	Active
chr1	133712672	133713245	Active
chr1	134060755	134061781	Active
chr1	134062987	134063840	Active
chr1	134067223	134067554	Active
chr1	134067865	134068282	Active
chr1	134092817	134093467	Active
chr1	134093926	134094450	Active
chr1	134095658	134096210	Active
chr1	134098530	134100220	Active
chr1	134210017	134211426	Active
chr1	134269969	134270450	Active
chr1	134325989	134327957	Active
chr1	134341925	134342600	Active
chr1	134343384	134345166	Active
chr1	134381677	134382464	Active
chr1	134432284	134433194	Active
chr1	134433316	134433788	Active
chr1	134491912	134493433	Active
chr1	134513236	134514002	Active
chr1	134534627	134536056	Active
chr1	134539070	134539731	Active
chr1	134555211	134555973	Active
chr1	134556070	134557604	Active
chr1	134570590	134571224	Active
chr1	135108294	135109681	Active
chr1	135109736	135110357	Active
chr1	135110504	135110849	Active
chr1	135153918	135155025	Active
chr1	135183299	135183725	Active
chr1	135184068	135184528	Active
chr1	135193616	135194453	Active
chr1	135198400	135200104	Active
chr1	135204647	135205193	Active
chr1	135217270	135218515	Active
chr1	135368064	135369880	Active
chr1	135472560	135473105	Active
chr1	135631654	135632611	Active
chr1	135637093	135637531	Active
chr1	135637714	135638081	Active
chr1	135659268	135659714	Active
chr1	135659815	135660134	Active
chr1	135675396	135676503	Active
chr1	135676610	135677503	Active
chr1	135698952	135699913	Active
chr1	135759613	135760792	Active
chr1	135770311	135771582	Active
chr1	135790789	135791501	Active
chr1	135791586	135791941	Active
chr1	135793345	135794195	Active
chr1	135794623	135795323	Active
chr1	135812737	135813320	Active
chr1	136105008	136106259	Active
chr1	136136321	136137502	Active
chr1	136139956	136140600	Active
chr1	136142441	136143144	Active
chr1	136173705	136174712	Active
chr1	136427522	136428159	Active
chr1	136473493	136474160	Active
chr1	136564898	136565371	Active
chr1	136566502	136566878	Active
chr1	136569041	136570016	Active
chr1	136570077	136570575	Active
chr1	136571132	136571494	Active
chr1	136594054	136594863	Active
chr1	136596494	136597224	Active
chr1	136644257	136645202	Active
chr1	136658544	136659015	Active
chr1	136660144	136660416	Active
chr1	136661301	136661781	Active
chr1	136661938	136662224	Active
chr1	136669294	136671044	Active
chr1	136671510	136672114	Active
chr1	136672499	136673150	Active
chr1	136674230	136675132	Active
chr1	136675381	136675718	Active
chr1	136676136	136676751	Active
chr1	136680091	136680678	Active
chr1	136683361	136683887	Active
chr1	136686626	136687189	Active
chr1	136689966	136690496	Active
chr1	136690559	136691497	Active
chr1	136692409	136692813	Active
chr1	136693424	136693749	Active
chr1	136706671	136708681	Active
chr1	136710983	136711735	Active
chr1	136727002	136727368	Active
chr1	136727877	136728280	Active
chr1	136730616	136731667	Active
chr1	136737937	136738551	Active
chr1	137173903	137174716	Active
chr1	137323938	137324511	Active
chr1	139494040	139495188	Active
chr1	139495287	139495737	Active
chr1	143733917	143734600	Active
chr1	150496634	150497345	Active
chr1	151177414	151178178	Active
chr1	151496590	151497696	Active
chr1	151515690	151516099	Active
chr1	151545004	151545899	Active
chr1	151685854	151686334	Active
chr1	151878418	151879168	Active
chr1	151879366	151880337	Active
chr1	152084524	152085100	Active
chr1	152555990	152556697	Active
chr1	152572860	152573831	Active
chr1	152790133	152790628	Active
chr1	152791034	152791994	Active
chr1	152792991	152793489	Active
chr1	152793568	152794097	Active
chr1	152814153	152815734	Active
chr1	152831713	152832646	Active
chr1	152832927	152833566	Active
chr1	152914964	152915505	Active
chr1	153009190	153009948	Active
chr1	153010680	153011936	Active
chr1	153031069	153031822	Active
chr1	153032921	153033659	Active
chr1	153047264	153047786	Active
chr1	153047874	153048434	Active
chr1	153076705	153077238	Active
chr1	153084274	153085269	Active
chr1	153090841	153091423	Active
chr1	153091955	153092894	Active
chr1	153094141	153094800	Active
chr1	153095144	153096749	Active
chr1	153098524	153099165	Active
chr1	153101039	153101774	Active
chr1	153104344	153104795	Active
chr1	153216865	153217312	Active
chr1	153287543	153288384	Active
chr1	153316288	153316841	Active
chr1	153376303	153376904	Active
chr1	153493237	153493879	Active
chr1	153493999	153494331	Active
chr1	153495364	153496380	Active
chr1	153501663	153502762	Active
chr1	153532326	153532891	Active
chr1	153641381	153642575	Active
chr1	153733167	153734291	Active
chr1	153740870	153741960	Active
chr1	155029117	155029411	Active
chr1	155053217	155053702	Active
chr1	155070663	155071969	Active
chr1	155215054	155215694	Active
chr1	155215914	155216444	Active
chr1	155243937	155245162	Active
chr1	155249831	155251043	Active
chr1	156072234	156072849	Active
chr1	156073136	156073782	Active
chr1	156076197	156077184	Active
chr1	156420269	156421595	Active
chr1	156604785	156605177	Active
chr1	156605643	156606011	Active
chr1	156614049	156614613	Active
chr1	156615228	156616106	Active
chr1	156654823	156655684	Active
chr1	156658845	156659386	Active
chr1	156659738	156660361	Active
chr1	156660385	156660727	Active
chr1	156660875	156661428	Active
chr1	156663160	156663793	Active
chr1	156665625	156666388	Active
chr1	156666581	156667377	Active
chr1	156667413	156668169	Active
chr1	156668311	156670157	Active
chr1	156676192	156677316	Active
chr1	156956271	156957054	Active
chr1	156961864	156962330	Active
chr1	156994815	156995527	Active
chr1	156997944	156998401	Active
chr1	157048407	157049420	Active
chr1	157085973	157087152	Active
chr1	157443140	157443813	Active
chr1	159419293	159420008	Active
chr1	159812592	159813484	Active
chr1	160734458	160735181	Active
chr1	161004700	161005814	Active
chr1	161139614	161140747	Active
chr1	161170633	161171140	Active
chr1	161444663	161445252	Active
chr1	161918577	161919045	Active
chr1	162567202	162568030	Active
chr1	162832529	162833237	Active
chr1	163163539	163164003	Active
chr1	164020324	164021125	Active
chr1	164319633	164320251	Active
chr1	164376982	164377593	Active
chr1	164449399	164449733	Active
chr1	164449829	164450281	Active
chr1	164452352	164453655	Active
chr1	164994168	164994614	Active
chr1	165018664	165019077	Active
chr1	165119771	165120360	Active
chr1	165281288	165283513	Active
chr1	165641355	165642155	Active
chr1	165642290	165643311	Active
chr1	165653461	165654123	Active
chr1	165771417	165772075	Active
chr1	165840761	165841289	Active
chr1	166045178	166045473	Active
chr1	166045705	166046023	Active
chr1	166055300	166055774	Active
chr1	166056017	166056817	Active
chr1	166124563	166125777	Active
chr1	166134806	166135391	Active
chr1	166135464	166135897	Active
chr1	166142337	166142933	Active
chr1	166151719	166152519	Active
chr1	166153477	166153767	Active
chr1	166154109	166154402	Active
chr1	166154579	166155346	Active
chr1	166155518	166156135	Active
chr1	166158066	166159630	Active
chr1	166159894	166161386	Active
chr1	166282612	166283268	Active
chr1	167045850	167046662	Active
chr1	167230823	167231964	Active
chr1	167267828	167268149	Active
chr1	167268255	167269026	Active
chr1	167269247	167271836	Active
chr1	167272065	167272551	Active
chr1	167273652	167274440	Active
chr1	167278811	167279911	Active
chr1	167289628	167290553	Active
chr1	167497092	167498908	Active
chr1	167802910	167804001	Active
chr1	167914978	167915482	Active
chr1	167915692	167916203	Active
chr1	168213581	168214636	Active
chr1	168220813	168221585	Active
chr1	168382459	168383281	Active
chr1	168416788	168417402	Active
chr1	170477642	170478519	Active
chr1	170521550	170522029	Active
chr1	170871218	170872133	Active
chr1	170889085	170889579	Active
chr1	170889812	170890108	Active
chr1	170989781	170990464	Active
chr1	171032575	171034586	Active
chr1	171037916	171038665	Active
chr1	171046529	171047322	Active
chr1	171089874	171090386	Active
chr1	171101722	171102420	Active
chr1	171102486	171102883	Active
chr1	171102981	171103881	Active
chr1	171110589	171111745	Active
chr1	171111806	171112285	Active
chr1	171238589	171238953	Active
chr1	171319509	171320623	Active
chr1	171321909	171322428	Active
chr1	171372769	171373248	Active
chr1	171373289	171374549	Active
chr1	171375540	171376283	Active
chr1	171470884	171471611	Active
chr1	171477833	171478779	Active
chr1	171499811	171500750	Active
chr1	171500818	171503172	Active
chr1	172012728	172013459	Active
chr1	172018937	172019195	Active
chr1	172019365	172020199	Active
chr1	172024318	172024743	Active
chr1	172052798	172053185	Active
chr1	172201241	172201515	Active
chr1	172216891	172217492	Active
chr1	172302807	172303608	Active
chr1	172317288	172317724	Active
chr1	172350454	172351132	Active
chr1	172364579	172365202	Active
chr1	172426493	172427046	Active
chr1	172489657	172490990	Active
chr1	172505003	172505463	Active
chr1	172510280	172511185	Active
chr1	172512813	172513585	Active
chr1	172514020	172514558	Active
chr1	172514921	172516204	Active
chr1	172525026	172525752	Active
chr1	172525848	172526561	Active
chr1	172657202	172657965	Active
chr1	173348610	173349308	Active
chr1	175028575	175029252	Active
chr1	176834844	176835615	Active
chr1	176993132	176993631	Active
chr1	176994691	176995735	Active
chr1	177008642	177009344	Active
chr1	177322532	177323320	Active
chr1	177702300	177703562	Active
chr1	177717134	177718313	Active
chr1	177719042	177719446	Active
chr1	178357675	178359037	Active
chr1	178359767	178360736	Active
chr1	178368360	178369820	Active
chr1	178543879	178544426	Active
chr1	178544572	178545220	Active
chr1	179087403	179088290	Active
chr1	179198729	179199230	Active
chr1	179462347	179462915	Active
chr1	179847573	179848536	Active
chr1	179958919	179960688	Active
chr1	180225267	180226716	Active
chr1	180249691	180250988	Active
chr1	180312837	180313440	Active
chr1	180313664	180314452	Active
chr1	180365089	180365741	Active
chr1	180387146	180387933	Active
chr1	180407050	180407644	Active
chr1	180548788	180549605	Active
chr1	180604328	180605189	Active
chr1	180605224	180605823	Active
chr1	180606667	180606999	Active
chr1	180607255	180607680	Active
chr1	180762281	180763702	Active
chr1	180767251	180769177	Active
chr1	180777143	180778809	Active
chr1	180792957	180794540	Active
chr1	180873701	180874767	Active
chr1	180883545	180884245	Active
chr1	180884354	180884685	Active
chr1	180886615	180887207	Active
chr1	180924432	180925604	Active
chr1	181015625	181016385	Active
chr1	181163322	181163730	Active
chr1	181163819	181164179	Active
chr1	181230579	181230955	Active
chr1	181231882	181232905	Active
chr1	181234070	181234961	Active
chr1	181256239	181257325	Active
chr1	181860425	181861124	Active
chr1	181863423	181864129	Active
chr1	181865149	181866037	Active
chr1	181921530	181922706	Active
chr1	181923391	181923852	Active
chr1	181953458	181954061	Active
chr1	182028110	182028873	Active
chr1	182030122	182030882	Active
chr1	182063506	182064412	Active
chr1	182081887	182082381	Active
chr1	182094525	182095134	Active
chr1	182095226	182095815	Active
chr1	182102643	182103043	Active
chr1	182103179	182103904	Active
chr1	182487534	182489126	Active
chr1	182506280	182507099	Active
chr1	182527654	182528954	Active
chr1	182959865	182960820	Active
chr1	182983073	182983577	Active
chr1	184019132	184019661	Active
chr1	184496614	184497372	Active
chr1	185099048	185099868	Active
chr1	185104451	185105798	Active
chr1	185207644	185208655	Active
chr1	185209534	185210326	Active
chr1	186510370	186510837	Active
chr1	186609576	186610511	Active
chr1	186721862	186722328	Active
chr1	186833331	186834782	Active
chr1	188660320	188660828	Active
chr1	189012818	189013855	Active
chr1	189142256	189143251	Active
chr1	189744825	189745348	Active
chr1	189754859	189755445	Active
chr1	189830431	189831445	Active
chr1	189882980	189883358	Active
chr1	189883552	189884662	Active
chr1	190174782	190175832	Active
chr1	191125795	191126523	Active
chr1	191216200	191216709	Active
chr1	191312108	191312938	Active
chr1	191660522	191661395	Active
chr1	191802163	191803372	Active
chr1	191926622	191929080	Active
chr1	191964254	191964727	Active
chr1	191964791	191965579	Active
chr1	191989864	191990469	Active
chr1	192794476	192795916	Active
chr1	192825749	192826732	Active
chr1	193382590	193383051	Active
chr1	193513680	193514940	Active
chr1	193538481	193539575	Active
chr1	193588950	193589445	Active
chr1	194610496	194611021	Active
chr1	194879245	194880040	Active
chr1	195241480	195241983	Active
chr2	4221325	4222423	Active
chr2	4539618	4540237	Active
chr2	4573528	4574785	Active
chr2	4574966	4575633	Active
chr2	4596963	4597654	Active
chr2	4983308	4984599	Active
chr2	4984906	4985480	Active
chr2	5014325	5015039	Active
chr2	5613692	5614139	Active
chr2	5614636	5615279	Active
chr2	5724812	5725633	Active
chr2	5809634	5810620	Active
chr2	5812389	5812924	Active
chr2	6061125	6061539	Active
chr2	6070875	6071525	Active
chr2	6071581	6072430	Active
chr2	6098850	6099339	Active
chr2	6100074	6101812	Active
chr2	6403467	6403998	Active
chr2	6458558	6460200	Active
chr2	6871784	6873160	Active
chr2	9985928	9986507	Active
chr2	10263785	10264214	Active
chr2	10264271	10264936	Active
chr2	10275540	10275978	Active
chr2	10276119	10276529	Active
chr2	10300663	10301255	Active
chr2	10301573	10302381	Active
chr2	10311642	10312591	Active
chr2	10364682	10365407	Active
chr2	10365627	10365913	Active
chr2	11535275	11536103	Active
chr2	11570808	11571534	Active
chr2	13258665	13259087	Active
chr2	13370553	13371052	Active
chr2	13371329	13372800	Active
chr2	13413516	13414159	Active
chr2	13767348	13767895	Active
chr2	15925108	15925921	Active
chr2	16811974	16812579	Active
chr2	17741608	17741910	Active
chr2	17742450	17742810	Active
chr2	17898935	17900342	Active
chr2	17932378	17932876	Active
chr2	17942080	17942598	Active
chr2	17942693	17943876	Active
chr2	17988951	17989544	Active
chr2	18688684	18690907	Active
chr2	18766621	18767604	Active
chr2	19160778	19161307	Active
chr2	19380307	19380786	Active
chr2	20209320	20210160	Active
chr2	20493767	20494172	Active
chr2	20496262	20496939	Active
chr2	20525718	20526580	Active
chr2	20546428	20547166	Active
chr2	20651562	20652072	Active
chr2	20654203	20655935	Active
chr2	20659546	20660050	Active
chr2	20663004	20663741	Active
chr2	20664930	20665614	Active
chr2	20667543	20668425	Active
chr2	20668888	20669409	Active
chr2	20669504	20669870	Active
chr2	20669960	20670677	Active
chr2	20671654	20674080	Active
chr2	20690689	20691473	Active
chr2	20692217	20692764	Active
chr2	20767306	20768360	Active
chr2	20894141	20894662	Active
chr2	20936449	20937254	Active
chr2	20943279	20943944	Active
chr2	20944006	20944675	Active
chr2	21392706	21393361	Active
chr2	21918071	21918784	Active
chr2	23002435	23003269	Active
chr2	23015164	23015665	Active
chr2	23457404	23457877	Active
chr2	23458025	23458291	Active
chr2	24405243	24406013	Active
chr2	24521697	24522350	Active
chr2	24912094	24912918	Active
chr2	24926716	24927600	Active
chr2	25162299	25163687	Active
chr2	25167679	25168397	Active
chr2	25185112	25186875	Active
chr2	25226747	25227787	Active
chr2	25228053	25229076	Active
chr2	25267811	25268555	Active
chr2	25568774	25569579	Active
chr2	26118364	26118842	Active
chr2	26118992	26119536	Active
chr2	26128896	26130152	Active
chr2	26132198	26135028	Active
chr2	26296909	26297873	Active
chr2	26297986	26299336	Active
chr2	26299642	26300023	Active
chr2	26300301	26300582	Active
chr2	26330006	26330816	Active
chr2	26446632	26447100	Active
chr2	26461730	26462663	Active
chr2	26485989	26486763	Active
chr2	26571422	26572119	Active
chr2	26609871	26610462	Active
chr2	26611051	26611476	Active
chr2	26632178	26634441	Active
chr2	26634653	26636592	Active
chr2	27288945	27289358	Active
chr2	27375617	27376575	Active
chr2	27377482	27379220	Active
chr2	27413717	27414131	Active
chr2	27468874	27469488	Active
chr2	27739892	27740971	Active
chr2	27741330	27741641	Active
chr2	27746004	27746486	Active
chr2	28479100	28479604	Active
chr2	28479760	28479981	Active
chr2	28516711	28518946	Active
chr2	28520466	28521140	Active
chr2	28521619	28522422	Active
chr2	28523410	28524313	Active
chr2	28524416	28526639	Active
chr2	28539092	28539945	Active
chr2	28611311	28611779	Active
chr2	28612487	28613289	Active
chr2	28908050	28908950	Active
chr2	28973706	28974074	Active
chr2	28974368	28975169	Active
chr2	29066303	29067004	Active
chr2	29099353	29100332	Active
chr2	29551890	29552256	Active
chr2	29552356	29552893	Active
chr2	29624714	29625502	Active
chr2	29628224	29628677	Active
chr2	29628746	29629818	Active
chr2	29643317	29644096	Active
chr2	29653075	29653552	Active
chr2	29691073	29692237	Active
chr2	29707420	29708794	Active
chr2	29709838	29710672	Active
chr2	29711311	29711677	Active
chr2	29711766	29712128	Active
chr2	29712299	29712786	Active
chr2	29728197	29728964	Active
chr2	29729360	29730587	Active
chr2	29750757	29752335	Active
chr2	29835109	29835588	Active
chr2	29835683	29835993	Active
chr2	29856565	29857842	Active
chr2	30073092	30073511	Active
chr2	30073941	30075183	Active
chr2	30084778	30085110	Active
chr2	30118313	30119623	Active
chr2	30119707	30120250	Active
chr2	30242441	30242943	Active
chr2	30251674	30252177	Active
chr2	30252679	30253701	Active
chr2	30336201	30337729	Active
chr2	30397756	30398466	Active
chr2	30398706	30399186	Active
chr2	30399351	30400398	Active
chr2	30439545	30439884	Active
chr2	30441164	30441925	Active
chr2	30442183	30443086	Active
chr2	30443327	30444297	Active
chr2	30444693	30445063	Active
chr2	30445229	30446081	Active
chr2	30462883	30464409	Active
chr2	30495525	30496861	Active
chr2	30544420	30545623	Active
chr2	30546937	30547226	Active
chr2	30547879	30548236	Active
chr2	30553868	30554796	Active
chr2	30604539	30606026	Active
chr2	30657773	30659240	Active
chr2	30659697	30660638	Active
chr2	30691071	30692194	Active
chr2	30692259	30693124	Active
chr2	30693312	30694046	Active
chr2	30706926	30709012	Active
chr2	30709125	30710139	Active
chr2	30711522	30712743	Active
chr2	30725344	30726474	Active
chr2	30753099	30753747	Active
chr2	30756249	30756835	Active
chr2	30757860	30759304	Active
chr2	30759583	30760431	Active
chr2	30771072	30772390	Active
chr2	30777808	30780647	Active
chr2	30784369	30785298	Active
chr2	30794419	30795010	Active
chr2	30796285	30796823	Active
chr2	30864629	30865705	Active
chr2	30870869	30871575	Active
chr2	30891162	30891736	Active
chr2	30917454	30918499	Active
chr2	30937725	30938319	Active
chr2	30938583	30939122	Active
chr2	30942618	30943449	Active
chr2	30985154	30985740	Active
chr2	31024549	31025784	Active
chr2	31027225	31028089	Active
chr2	31057475	31058304	Active
chr2	31060759	31061185	Active
chr2	31061341	31061814	Active
chr2	31066936	31067646	Active
chr2	31067714	31068617	Active
chr2	31068791	31069897	Active
chr2	31090850	31091674	Active
chr2	31129927	31130186	Active
chr2	31130450	31131398	Active
chr2	31162843	31164720	Active
chr2	31166419	31167591	Active
chr2	31238538	31240028	Active
chr2	31255924	31257016	Active
chr2	31258639	31260157	Active
chr2	31452971	31453508	Active
chr2	31494219	31495325	Active
chr2	31499818	31502232	Active
chr2	31528057	31529011	Active
chr2	31611272	31611936	Active
chr2	31612155	31613302	Active
chr2	31613443	31613807	Active
chr2	31617546	31618235	Active
chr2	31634921	31635875	Active
chr2	31749127	31749713	Active
chr2	31901626	31902481	Active
chr2	32072546	32073201	Active
chr2	32078096	32078934	Active
chr2	32127683	32128738	Active
chr2	32133934	32134813	Active
chr2	32137515	32138262	Active
chr2	32139036	32139828	Active
chr2	32140151	32141133	Active
chr2	32157016	32157240	Active
chr2	32157446	32157694	Active
chr2	32158377	32159347	Active
chr2	32161466	32162664	Active
chr2	32162786	32163100	Active
chr2	32163193	32163575	Active
chr2	32164474	32165823	Active
chr2	32166589	32167476	Active
chr2	32167774	32168150	Active
chr2	32168841	32169806	Active
chr2	32170813	32171639	Active
chr2	32173908	32174807	Active
chr2	32175078	32176025	Active
chr2	32176792	32177402	Active
chr2	32177663	32178801	Active
chr2	32180188	32180853	Active
chr2	32311938	32313461	Active
chr2	32328505	32329781	Active
chr2	32361489	32361808	Active
chr2	32401794	32402395	Active
chr2	32501536	32502375	Active
chr2	32554938	32555503	Active
chr2	32602362	32603083	Active
chr2	32679877	32680770	Active
chr2	32680864	32682020	Active
chr2	32682302	32682550	Active
chr2	32684524	32685531	Active
chr2	32689043	32689936	Active
chr2	32691084	32691710	Active
chr2	32780962	32781529	Active
chr2	32859013	32860051	Active
chr2	32860671	32861386	Active
chr2	32870020	32870645	Active
chr2	32870704	32871550	Active
chr2	32895979	32898532	Active
chr2	32908172	32908770	Active
chr2	32908855	32909629	Active
chr2	32911334	32912164	Active
chr2	32912223	32912796	Active
chr2	32913947	32915465	Active
chr2	32917425	32918084	Active
chr2	32928049	32928809	Active
chr2	32939533	32939867	Active
chr2	32940043	32940472	Active
chr2	32965636	32966075	Active
chr2	32966277	32968732	Active
chr2	32971187	32971581	Active
chr2	33159412	33160888	Active
chr2	33436138	33437521	Active
chr2	33438251	33438864	Active
chr2	33439497	33440216	Active
chr2	33440335	33441433	Active
chr2	33575035	33576241	Active
chr2	33581930	33582292	Active
chr2	33594820	33595759	Active
chr2	33615942	33616899	Active
chr2	33631079	33633051	Active
chr2	33876519	33876934	Active
chr2	34249279	34250342	Active
chr2	34627068	34627620	Active
chr2	34627789	34628151	Active
chr2	34643766	34645410	Active
chr2	34645709	34646728	Active
chr2	34646846	34647709	Active
chr2	34668414	34669809	Active
chr2	34671651	34671965	Active
chr2	34919914	34920827	Active
chr2	34944695	34945893	Active
chr2	35445502	35445774	Active
chr2	35446460	35446741	Active
chr2	35486528	35487264	Active
chr2	35487683	35488059	Active
chr2	35539290	35539926	Active
chr2	35608845	35609711	Active
chr2	35609717	35610872	Active
chr2	35611245	35612012	Active
chr2	35613056	35614775	Active
chr2	35615231	35615874	Active
chr2	35615990	35616392	Active
chr2	35660585	35662395	Active
chr2	35662517	35663497	Active
chr2	35677080	35677887	Active
chr2	35677946	35678335	Active
chr2	35679694	35680533	Active
chr2	35714377	35715140	Active
chr2	35729417	35730334	Active
chr2	36010636	36012021	Active
chr2	36090720	36091907	Active
chr2	36198145	36199308	Active
chr2	37360639	37361466	Active
chr2	37765185	37765539	Active
chr2	37768260	37768966	Active
chr2	37771087	37772252	Active
chr2	38052161	38052776	Active
chr2	38539653	38540230	Active
chr2	38541170	38541850	Active
chr2	38546232	38547172	Active
chr2	38548054	38548441	Active
chr2	38555389	38557048	Active
chr2	38560078	38561105	Active
chr2	38561187	38561756	Active
chr2	38578183	38579704	Active
chr2	38585159	38585672	Active
chr2	38658410	38658765	Active
chr2	38689416	38689749	Active
chr2	38986930	38988565	Active
chr2	44525261	44526011	Active
chr2	44556662	44557395	Active
chr2	49364070	49364354	Active
chr2	49364550	49365050	Active
chr2	49366932	49367783	Active
chr2	49570481	49571038	Active
chr2	49571102	49572676	Active
chr2	49744520	49744950	Active
chr2	49745011	49745812	Active
chr2	50265127	50265986	Active
chr2	50687219	50687763	Active
chr2	51049743	51050179	Active
chr2	51139336	51139929	Active
chr2	51140400	51140949	Active
chr2	52078574	52079092	Active
chr2	52378452	52379412	Active
chr2	52635446	52636291	Active
chr2	52913261	52914083	Active
chr2	52958022	52958615	Active
chr2	52958881	52959797	Active
chr2	53007206	53007740	Active
chr2	57229527	57230308	Active
chr2	57253253	57253768	Active
chr2	57256488	57256895	Active
chr2	58515894	58516291	Active
chr2	58532278	58532886	Active
chr2	58551471	58552486	Active
chr2	58625313	58626211	Active
chr2	58627883	58628370	Active
chr2	58699780	58700534	Active
chr2	59239652	59240356	Active
chr2	59350040	59350555	Active
chr2	59470343	59471079	Active
chr2	59523547	59523858	Active
chr2	59523928	59524345	Active
chr2	59622385	59623080	Active
chr2	59623715	59624409	Active
chr2	59627371	59628810	Active
chr2	59629310	59630272	Active
chr2	59633651	59634264	Active
chr2	59636940	59637789	Active
chr2	59670197	59671111	Active
chr2	59675338	59676960	Active
chr2	59697853	59698634	Active
chr2	59736198	59736960	Active
chr2	59769252	59769773	Active
chr2	59772343	59772688	Active
chr2	59775037	59775539	Active
chr2	59829915	59830907	Active
chr2	59878029	59878680	Active
chr2	60021032	60021462	Active
chr2	60414226	60414852	Active
chr2	60693378	60694101	Active
chr2	60870769	60871384	Active
chr2	61403028	61403495	Active
chr2	61656371	61657071	Active
chr2	61810550	61812763	Active
chr2	61815539	61816387	Active
chr2	63542222	63543110	Active
chr2	63702266	63703019	Active
chr2	64591478	64592525	Active
chr2	65414326	65414644	Active
chr2	65414785	65415469	Active
chr2	67564853	67566259	Active
chr2	67566562	67567499	Active
chr2	68291969	68292864	Active
chr2	68825356	68826034	Active
chr2	68873579	68874943	Active
chr2	69049148	69050116	Active
chr2	69584540	69584983	Active
chr2	69640046	69640487	Active
chr2	70278470	70279223	Active
chr2	70340204	70340936	Active
chr2	70550694	70551120	Active
chr2	70568589	70569095	Active
chr2	70689538	70691554	Active
chr2	70708975	70709602	Active
chr2	70802604	70802974	Active
chr2	70805827	70806401	Active
chr2	70808597	70809277	Active
chr2	70830668	70831288	Active
chr2	71336216	71336549	Active
chr2	71336651	71337221	Active
chr2	71349537	71350043	Active
chr2	71350108	71350500	Active
chr2	71353264	71354458	Active
chr2	71375889	71376852	Active
chr2	71580929	71581431	Active
chr2	71629106	71629627	Active
chr2	71629784	71630125	Active
chr2	71651983	71652972	Active
chr2	71655062	71655468	Active
chr2	71655535	71656558	Active
chr2	71801427	71802094	Active
chr2	71805764	71806553	Active
chr2	71815184	71815635	Active
chr2	71866325	71867365	Active
chr2	72018356	72019288	Active
chr2	72136676	72137219	Active
chr2	72137252	72137790	Active
chr2	73003778	73004191	Active
chr2	73004468	73005015	Active
chr2	73023608	73024434	Active
chr2	73037388	73039002	Active
chr2	73053960	73054593	Active
chr2	73280572	73281572	Active
chr2	73791842	73793000	Active
chr2	74654905	74656557	Active
chr2	75609551	75610942	Active
chr2	75680477	75681256	Active
chr2	75681319	75681635	Active
chr2	75682454	75683830	Active
chr2	75695660	75696871	Active
chr2	75696965	75697640	Active
chr2	75768099	75768974	Active
chr2	75869183	75870263	Active
chr2	75873692	75874476	Active
chr2	75960208	75960554	Active
chr2	75960620	75960919	Active
chr2	75990826	75991334	Active
chr2	75991677	75992568	Active
chr2	76050035	76050572	Active
chr2	76070415	76070765	Active
chr2	76699149	76700148	Active
chr2	77146262	77147912	Active
chr2	77176365	77176817	Active
chr2	77177448	77177905	Active
chr2	77336847	77337114	Active
chr2	77343622	77344209	Active
chr2	77586663	77587376	Active
chr2	79458467	79459904	Active
chr2	79566644	79566969	Active
chr2	81848847	81849431	Active
chr2	83692711	83693150	Active
chr2	84504960	84505322	Active
chr2	84624020	84624936	Active
chr2	84635536	84636063	Active
chr2	84810862	84811324	Active
chr2	84851017	84851693	Active
chr2	84865602	84866821	Active
chr2	85059782	85060667	Active
chr2	85060779	85061705	Active
chr2	87534733	87535368	Active
chr2	90474766	90475448	Active
chr2	90559564	90559971	Active
chr2	90560114	90560751	Active
chr2	90889039	90891178	Active
chr2	91042699	91043912	Active
chr2	91044720	91045080	Active
chr2	91045174	91045849	Active
chr2	91061943	91062506	Active
chr2	91078102	91079502	Active
chr2	91114897	91115680	Active
chr2	91537593	91538290	Active
chr2	91656746	91657333	Active
chr2	91657637	91658640	Active
chr2	91705527	91706104	Active
chr2	91957080	91958374	Active
chr2	91958813	91960915	Active
chr2	91967815	91968680	Active
chr2	91983118	91983668	Active
chr2	91984150	91985617	Active
chr2	92006386	92007243	Active
chr2	92007328	92007635	Active
chr2	92008110	92009345	Active
chr2	92012455	92013386	Active
chr2	92055275	92055788	Active
chr2	92055881	92056188	Active
chr2	92143591	92144635	Active
chr2	92366778	92367922	Active
chr2	92387583	92388535	Active
chr2	92388680	92390120	Active
chr2	92390457	92391011	Active
chr2	92422477	92423175	Active
chr2	92423761	92424338	Active
chr2	92805684	92806041	Active
chr2	92945836	92946726	Active
chr2	92947885	92948749	Active
chr2	92967118	92967655	Active
chr2	92987150	92989735	Active
chr2	93176579	93177615	Active
chr2	93198245	93200378	Active
chr2	93470054	93470860	Active
chr2	93872755	93873172	Active
chr2	93890788	93891687	Active
chr2	93975125	93975941	Active
chr2	93976310	93977235	Active
chr2	94001386	94001819	Active
chr2	94178176	94179248	Active
chr2	94271917	94274897	Active
chr2	101754780	101755791	Active
chr2	101755985	101756503	Active
chr2	101905384	101906724	Active
chr2	102116233	102117524	Active
chr2	102119357	102120066	Active
chr2	102121228	102121733	Active
chr2	102121922	102122593	Active
chr2	102130106	102130989	Active
chr2	102131160	102132198	Active
chr2	102137206	102137737	Active
chr2	102165402	102166058	Active
chr2	102166318	102167515	Active
chr2	103435990	103436767	Active
chr2	103655805	103656417	Active
chr2	103992873	103993389	Active
chr2	104098794	104099456	Active
chr2	104145633	104146372	Active
chr2	104604672	104605066	Active
chr2	104855701	104856073	Active
chr2	104856382	104856696	Active
chr2	105113929	105114473	Active
chr2	105122747	105123391	Active
chr2	105152897	105153680	Active
chr2	105370434	105371106	Active
chr2	105510655	105511503	Active
chr2	105610943	105611627	Active
chr2	105659826	105660459	Active
chr2	105671677	105672479	Active
chr2	105680030	105680925	Active
chr2	105681103	105681741	Active
chr2	105687803	105688180	Active
chr2	105689965	105690249	Active
chr2	105690358	105690686	Active
chr2	106455534	106456494	Active
chr2	106526986	106527473	Active
chr2	106561477	106562193	Active
chr2	106677272	106677961	Active
chr2	106855849	106856320	Active
chr2	106856367	106857168	Active
chr2	107082864	107083684	Active
chr2	109942087	109942560	Active
chr2	112250957	112252299	Active
chr2	112497704	112498442	Active
chr2	113538067	113538476	Active
chr2	114177512	114178886	Active
chr2	115723280	115724068	Active
chr2	116021034	116021514	Active
chr2	116942263	116942936	Active
chr2	116972412	116972917	Active
chr2	116973421	116974345	Active
chr2	116974933	116976365	Active
chr2	116976890	116977565	Active
chr2	116978630	116979374	Active
chr2	116979696	116980319	Active
chr2	117018431	117018803	Active
chr2	117018901	117019437	Active
chr2	117194214	117194849	Active
chr2	117210619	117211204	Active
chr2	118510284	118511312	Active
chr2	118587033	118588098	Active
chr2	118619836	118621015	Active
chr2	118640062	118640960	Active
chr2	118658931	118659832	Active
chr2	118882994	118883708	Active
chr2	118972678	118973141	Active
chr2	118975741	118976820	Active
chr2	119145075	119145825	Active
chr2	119147028	119147772	Active
chr2	119188850	119189353	Active
chr2	119189409	119189786	Active
chr2	119250163	119251131	Active
chr2	119251203	119251428	Active
chr2	119299444	119300461	Active
chr2	119300597	119301564	Active
chr2	119304836	119305293	Active
chr2	119337418	119338411	Active
chr2	119463773	119464201	Active
chr2	119804094	119805103	Active
chr2	119808533	119809512	Active
chr2	119843590	119844718	Active
chr2	119857410	119858145	Active
chr2	120044051	120044395	Active
chr2	120268481	120269518	Active
chr2	121509434	121509938	Active
chr2	121548650	121549668	Active
chr2	121621186	121621722	Active
chr2	122125556	122126695	Active
chr2	122127733	122128204	Active
chr2	122347892	122349674	Active
chr2	122375131	122376655	Active
chr2	122377227	122377640	Active
chr2	122377700	122378156	Active
chr2	122378657	122379067	Active
chr2	124145316	124146063	Active
chr2	124640715	124641341	Active
chr2	125301861	125302687	Active
chr2	125731668	125732459	Active
chr2	126521620	126522856	Active
chr2	126780048	126781192	Active
chr2	126787530	126788581	Active
chr2	127136873	127137433	Active
chr2	128211008	128212481	Active
chr2	128264059	128266285	Active
chr2	128266655	128267231	Active
chr2	128273430	128274434	Active
chr2	129038965	129039333	Active
chr2	129205441	129206032	Active
chr2	129226255	129226901	Active
chr2	129227082	129227640	Active
chr2	129240318	129241447	Active
chr2	129242062	129242826	Active
chr2	129244224	129245189	Active
chr2	129587245	129588493	Active
chr2	129695743	129696478	Active
chr2	130633627	130636705	Active
chr2	130693893	130695099	Active
chr2	131044315	131045224	Active
chr2	131096187	131096374	Active
chr2	131096464	131096795	Active
chr2	131150995	131152205	Active
chr2	131170859	131171710	Active
chr2	131253870	131254596	Active
chr2	131422733	131423382	Active
chr2	131498739	131499380	Active
chr2	131509674	131510313	Active
chr2	131510486	131510756	Active
chr2	132135904	132136659	Active
chr2	132234053	132235179	Active
chr2	132235318	132236550	Active
chr2	132284048	132284427	Active
chr2	132285076	132285639	Active
chr2	132286336	132286899	Active
chr2	132290981	132291589	Active
chr2	132292207	132292612	Active
chr2	132652475	132652877	Active
chr2	132701481	132702053	Active
chr2	134960334	134961156	Active
chr2	135072486	135072916	Active
chr2	135072982	135073363	Active
chr2	135439639	135440261	Active
chr2	135558456	135558995	Active
chr2	135559379	135559641	Active
chr2	135559938	135560634	Active
chr2	135562189	135562903	Active
chr2	135614711	135615136	Active
chr2	135717273	135718234	Active
chr2	135764305	135765161	Active
chr2	135769993	135770496	Active
chr2	136677490	136678125	Active
chr2	136678528	136679281	Active
chr2	136679836	136680414	Active
chr2	136680638	136681045	Active
chr2	137095719	137096288	Active
chr2	137096617	137096856	Active
chr2	137098219	137099120	Active
chr2	137100843	137101408	Active
chr2	137109423	137110241	Active
chr2	138265019	138265495	Active
chr2	138265580	138266093	Active
chr2	139873616	139874450	Active
chr2	140077409	140078122	Active
chr2	140676657	140677811	Active
chr2	141266476	141267175	Active
chr2	143117226	143117904	Active
chr2	143118139	143118655	Active
chr2	143889698	143890548	Active
chr2	143890947	143891518	Active
chr2	143909275	143909895	Active
chr2	143923861	143924972	Active
chr2	144077479	144078325	Active
chr2	144084677	144085552	Active
chr2	144085974	144086665	Active
chr2	144156633	144157122	Active
chr2	144158194	144158417	Active
chr2	144159986	144161672	Active
chr2	144164987	144165969	Active
chr2	144166170	144166826	Active
chr2	144274217	144275189	Active
chr2	144310236	144310713	Active
chr2	144416232	144417597	Active
chr2	144417655	144418491	Active
chr2	144714744	144715896	Active
chr2	144716045	144716724	Active
chr2	144717234	144717946	Active
chr2	144718135	144718851	Active
chr2	145860287	145860770	Active
chr2	145887995	145889109	Active
chr2	146045434	146045850	Active
chr2	146061826	146062447	Active
chr2	146062542	146062903	Active
chr2	146496970	146497510	Active
chr2	146630719	146631600	Active
chr2	146833788	146834081	Active
chr2	146834313	146835630	Active
chr2	146920477	146920987	Active
chr2	147292337	147292999	Active
chr2	147293325	147294020	Active
chr2	147968660	147969217	Active
chr2	148122502	148122922	Active
chr2	148706536	148707465	Active
chr2	148902142	148902810	Active
chr2	149573172	149574067	Active
chr2	149932799	149933835	Active
chr2	149982370	149983872	Active
chr2	150311026	150311703	Active
chr2	150637640	150638858	Active
chr2	150650606	150651187	Active
chr2	150949380	150950333	Active
chr2	150954019	150954552	Active
chr2	150954950	150956035	Active
chr2	151575773	151576417	Active
chr2	151576525	151577033	Active
chr2	151604811	151605912	Active
chr2	151970279	151971388	Active
chr2	151990749	151991362	Active
chr2	151991737	151992436	Active
chr2	152006809	152007187	Active
chr2	152007769	152008619	Active
chr2	152011444	152011710	Active
chr2	152011817	152012107	Active
chr2	152012222	152012469	Active
chr2	152012641	152012927	Active
chr2	152013055	152013526	Active
chr2	152023800	152024184	Active
chr2	152025018	152025584	Active
chr2	152029062	152030399	Active
chr2	152047896	152049356	Active
chr2	152092865	152094086	Active
chr2	152094844	152096823	Active
chr2	152096983	152097967	Active
chr2	152111403	152112617	Active
chr2	152114057	152115633	Active
chr2	152176359	152178215	Active
chr2	152178329	152179005	Active
chr2	152179940	152180881	Active
chr2	152189123	152190167	Active
chr2	152190282	152190731	Active
chr2	152197009	152197738	Active
chr2	152348511	152350328	Active
chr2	152350492	152351167	Active
chr2	152360247	152361269	Active
chr2	152363450	152364316	Active
chr2	152366980	152368215	Active
chr2	152390919	152391245	Active
chr2	152392173	152393191	Active
chr2	152405980	152407300	Active
chr2	152410470	152411356	Active
chr2	152411442	152411816	Active
chr2	152437245	152437917	Active
chr2	152703274	152703925	Active
chr2	152703992	152704316	Active
chr2	152705032	152706772	Active
chr2	152706998	152708331	Active
chr2	152723725	152724466	Active
chr2	152727886	152729077	Active
chr2	152741428	152742116	Active
chr2	152764476	152764899	Active
chr2	152766367	152766815	Active
chr2	152767432	152768285	Active
chr2	152804254	152804991	Active
chr2	152805075	152805427	Active
chr2	152805878	152806754	Active
chr2	152816095	152816792	Active
chr2	152819930	152821031	Active
chr2	152821194	152821679	Active
chr2	152913945	152914847	Active
chr2	153071720	153072280	Active
chr2	153167753	153168613	Active
chr2	153203891	153204405	Active
chr2	153309168	153309758	Active
chr2	153370800	153371419	Active
chr2	153436468	153437708	Active
chr2	153509122	153509411	Active
chr2	153522435	153522964	Active
chr2	153523060	153523597	Active
chr2	153560354	153561131	Active
chr2	153580576	153581099	Active
chr2	153582999	153583835	Active
chr2	153584290	153584896	Active
chr2	153586259	153587138	Active
chr2	153592014	153592903	Active
chr2	153593209	153593876	Active
chr2	153597092	153598450	Active
chr2	153599915	153600824	Active
chr2	153608969	153609417	Active
chr2	153610804	153611547	Active
chr2	153612576	153613465	Active
chr2	153622478	153623207	Active
chr2	153642307	153643446	Active
chr2	154335467	154335852	Active
chr2	154417071	154417572	Active
chr2	154419089	154419583	Active
chr2	154419822	154420342	Active
chr2	154420726	154421207	Active
chr2	154421360	154421909	Active
chr2	154426075	154426996	Active
chr2	154427175	154427489	Active
chr2	154427550	154428624	Active
chr2	154507430	154507879	Active
chr2	154507942	154508549	Active
chr2	154648177	154648812	Active
chr2	154676773	154678149	Active
chr2	154693106	154694376	Active
chr2	155050230	155051507	Active
chr2	155585366	155585869	Active
chr2	155811648	155812992	Active
chr2	156344739	156345639	Active
chr2	156400897	156401809	Active
chr2	156407003	156407551	Active
chr2	156425159	156426483	Active
chr2	156428701	156429484	Active
chr2	156429804	156430326	Active
chr2	156431554	156432618	Active
chr2	156432743	156433467	Active
chr2	156440139	156441048	Active
chr2	156603725	156604512	Active
chr2	156640703	156641101	Active
chr2	156642372	156643676	Active
chr2	156643863	156644918	Active
chr2	156664696	156665289	Active
chr2	156690076	156691514	Active
chr2	156693321	156694054	Active
chr2	156717231	156717662	Active
chr2	156725207	156725566	Active
chr2	156725707	156727560	Active
chr2	156729850	156731142	Active
chr2	156731872	156732624	Active
chr2	156748450	156750220	Active
chr2	156780647	156781589	Active
chr2	156781803	156782172	Active
chr2	156782254	156782715	Active
chr2	156882283	156882972	Active
chr2	157054417	157054872	Active
chr2	157054956	157055378	Active
chr2	157057758	157059700	Active
chr2	157099690	157100726	Active
chr2	157247814	157248480	Active
chr2	157327801	157328130	Active
chr2	157328360	157328969	Active
chr2	157329185	157330019	Active
chr2	157340205	157340826	Active
chr2	157341464	157342247	Active
chr2	157375726	157376761	Active
chr2	157389044	157389585	Active
chr2	157389703	157390452	Active
chr2	157392051	157393017	Active
chr2	157396686	157397603	Active
chr2	157397702	157398350	Active
chr2	157429619	157430111	Active
chr2	157432251	157432903	Active
chr2	157434396	157435683	Active
chr2	157436217	157436888	Active
chr2	157437057	157437511	Active
chr2	157456485	157456834	Active
chr2	157458335	157459629	Active
chr2	157459644	157460878	Active
chr2	157469594	157471061	Active
chr2	157475091	157476481	Active
chr2	157506508	157507482	Active
chr2	157568534	157569672	Active
chr2	157590754	157591097	Active
chr2	157591419	157592001	Active
chr2	157674843	157675359	Active
chr2	157676686	157677682	Active
chr2	157840498	157841076	Active
chr2	157927328	157928009	Active
chr2	157928185	157928737	Active
chr2	157941096	157941653	Active
chr2	157943296	157944943	Active
chr2	157966476	157967393	Active
chr2	157974196	157975034	Active
chr2	157975109	157975929	Active
chr2	158153790	158155455	Active
chr2	158179049	158180003	Active
chr2	158369728	158370092	Active
chr2	158370310	158370934	Active
chr2	158789131	158789857	Active
chr2	158800140	158801179	Active
chr2	159234328	159235661	Active
chr2	160359764	160360227	Active
chr2	160421259	160421974	Active
chr2	160451319	160451898	Active
chr2	160452033	160452618	Active
chr2	160655882	160656992	Active
chr2	161339216	161339680	Active
chr2	161340196	161342302	Active
chr2	162922691	162923191	Active
chr2	162927866	162928615	Active
chr2	162928786	162929749	Active
chr2	162973328	162974106	Active
chr2	162998452	162999590	Active
chr2	163031312	163032967	Active
chr2	163048127	163048540	Active
chr2	163063627	163064019	Active
chr2	163067876	163069170	Active
chr2	163071412	163072044	Active
chr2	163072918	163073230	Active
chr2	163073576	163074081	Active
chr2	163074346	163075884	Active
chr2	163075943	163077073	Active
chr2	163084129	163084874	Active
chr2	163338671	163340098	Active
chr2	163375221	163376428	Active
chr2	163386585	163387291	Active
chr2	163534997	163535432	Active
chr2	163895308	163896154	Active
chr2	163914202	163914590	Active
chr2	164430447	164430967	Active
chr2	164431128	164432224	Active
chr2	164432511	164433682	Active
chr2	164436372	164437333	Active
chr2	164520741	164521406	Active
chr2	164788991	164789373	Active
chr2	164792998	164794035	Active
chr2	164816993	164817554	Active
chr2	164817691	164818229	Active
chr2	164854033	164855402	Active
chr2	164866989	164867379	Active
chr2	164868038	164868339	Active
chr2	164874263	164874846	Active
chr2	164875089	164875441	Active
chr2	164917246	164917932	Active
chr2	164918034	164918605	Active
chr2	164955882	164956786	Active
chr2	164957263	164957969	Active
chr2	164997337	164997965	Active
chr2	164998170	164998527	Active
chr2	165070158	165071162	Active
chr2	165135998	165136904	Active
chr2	165137246	165137802	Active
chr2	165397804	165398399	Active
chr2	165563158	165564091	Active
chr2	165716854	165717555	Active
chr2	165740399	165740760	Active
chr2	165741654	165742627	Active
chr2	165784395	165785262	Active
chr2	165785389	165786330	Active
chr2	165791075	165791390	Active
chr2	165792206	165792930	Active
chr2	165805207	165805656	Active
chr2	165806177	165806765	Active
chr2	165807398	165808826	Active
chr2	165809046	165809639	Active
chr2	165809704	165810526	Active
chr2	165810994	165811223	Active
chr2	165811453	165812661	Active
chr2	165827943	165828494	Active
chr2	165828928	165830723	Active
chr2	165831462	165832183	Active
chr2	165852420	165852879	Active
chr2	165914314	165914841	Active
chr2	165922085	165922641	Active
chr2	165967756	165968476	Active
chr2	165968937	165970203	Active
chr2	165981082	165982111	Active
chr2	165982368	165982846	Active
chr2	165982954	165983552	Active
chr2	166008493	166009541	Active
chr2	166066243	166066854	Active
chr2	166073156	166073790	Active
chr2	166074325	166075468	Active
chr2	166075970	166076413	Active
chr2	166078246	166079805	Active
chr2	166080332	166080925	Active
chr2	166081057	166081607	Active
chr2	166125474	166126429	Active
chr2	166137215	166137963	Active
chr2	166138085	166138749	Active
chr2	166144859	166145307	Active
chr2	166145638	166146186	Active
chr2	166146371	166147459	Active
chr2	166161899	166162930	Active
chr2	166174412	166175538	Active
chr2	166194059	166194803	Active
chr2	166195121	166195983	Active
chr2	166646403	166647475	Active
chr2	166674692	166675186	Active
chr2	166675479	166676872	Active
chr2	166786070	166787229	Active
chr2	167058801	167059214	Active
chr2	167071583	167072884	Active
chr2	167073066	167073907	Active
chr2	167078179	167079477	Active
chr2	167128152	167129836	Active
chr2	167155252	167155780	Active
chr2	167155856	167156335	Active
chr2	167211637	167212279	Active
chr2	167220979	167221765	Active
chr2	167222017	167222747	Active
chr2	167299682	167300270	Active
chr2	167343000	167343527	Active
chr2	167399130	167399500	Active
chr2	167399590	167399958	Active
chr2	167445817	167446513	Active
chr2	167477933	167478638	Active
chr2	167539840	167541078	Active
chr2	167541213	167542336	Active
chr2	167542823	167544507	Active
chr2	167559247	167560516	Active
chr2	167578276	167579143	Active
chr2	167588594	167589079	Active
chr2	167589452	167590070	Active
chr2	167595713	167596170	Active
chr2	167621287	167622814	Active
chr2	167708195	167708722	Active
chr2	167764728	167765043	Active
chr2	167765178	167765779	Active
chr2	167765949	167767241	Active
chr2	167924864	167925651	Active
chr2	167941789	167942665	Active
chr2	168049476	168050981	Active
chr2	168058354	168059737	Active
chr2	168066661	168067303	Active
chr2	168114324	168115653	Active
chr2	168116600	168118297	Active
chr2	168128570	168129001	Active
chr2	168158475	168158790	Active
chr2	168158852	168159707	Active
chr2	168159927	168160855	Active
chr2	168161190	168162267	Active
chr2	168166995	168167578	Active
chr2	168167656	168168101	Active
chr2	168168431	168169355	Active
chr2	168169550	168170561	Active
chr2	168205171	168205588	Active
chr2	168213417	168214622	Active
chr2	168252479	168253151	Active
chr2	168524565	168526022	Active
chr2	168677209	168678519	Active
chr2	168683407	168684310	Active
chr2	168687247	168687993	Active
chr2	168688213	168688462	Active
chr2	168755283	168757211	Active
chr2	168761122	168761713	Active
chr2	168775117	168776050	Active
chr2	168780517	168781156	Active
chr2	168791076	168791747	Active
chr2	168893739	168894226	Active
chr2	168894384	168894626	Active
chr2	168911422	168912617	Active
chr2	168913209	168913670	Active
chr2	168919427	168920018	Active
chr2	168925439	168926184	Active
chr2	168926470	168927209	Active
chr2	168934916	168935845	Active
chr2	168951355	168951936	Active
chr2	168952106	168952940	Active
chr2	168962265	168962574	Active
chr2	168979072	168979974	Active
chr2	168980774	168981896	Active
chr2	169004596	169004955	Active
chr2	169006442	169007110	Active
chr2	169089090	169089339	Active
chr2	169728668	169729165	Active
chr2	170045597	170046653	Active
chr2	170094008	170094643	Active
chr2	170103173	170104055	Active
chr2	170183534	170184093	Active
chr2	170184330	170184819	Active
chr2	170185172	170185880	Active
chr2	170201659	170202565	Active
chr2	170205616	170206039	Active
chr2	170206386	170207110	Active
chr2	170209066	170209471	Active
chr2	170246597	170247351	Active
chr2	170257978	170258896	Active
chr2	170261226	170262162	Active
chr2	170318712	170319492	Active
chr2	170323919	170324584	Active
chr2	170469121	170469956	Active
chr2	170529603	170530710	Active
chr2	170772004	170772507	Active
chr2	170838076	170838590	Active
chr2	171231056	171232331	Active
chr2	171878902	171879459	Active
[truncated: 17,727 more rows]

## Sheet: Supplementary Table 2f
Chr	Start	End	Sort
chr1	4328258	4328658	G4_Up
chr1	4674567	4674967	G4_Up
chr1	4802597	4802997	G4_Up
chr1	4810216	4810616	G4_Up
chr1	4848075	4848475	G4_Up
chr1	4855505	4855905	G4_Up
chr1	4911237	4911637	G4_Up
chr1	5232864	5233264	G4_Up
chr1	5261304	5261704	G4_Up
chr1	6984744	6985144	G4_Up
chr1	7047250	7047650	G4_Up
chr1	7201651	7202051	G4_Up
chr1	7388501	7388901	G4_Up
chr1	7502599	7502999	G4_Up
chr1	7542667	7543067	G4_Up
chr1	8187362	8187762	G4_Up
chr1	8936051	8936451	G4_Up
chr1	9187018	9187418	G4_Up
chr1	9545107	9545507	G4_Up
chr1	9601479	9601879	G4_Up
chr1	9941169	9941569	G4_Up
chr1	10226367	10226767	G4_Up
chr1	10878242	10878642	G4_Up
chr1	10880261	10880661	G4_Up
chr1	11277883	11278283	G4_Up
chr1	11395385	11395785	G4_Up
chr1	11564848	11565248	G4_Up
chr1	12636726	12637126	G4_Up
chr1	12905457	12905857	G4_Up
chr1	13074534	13074934	G4_Up
chr1	13178699	13179099	G4_Up
chr1	13364387	13364787	G4_Up
chr1	13434749	13435149	G4_Up
chr1	13543766	13544166	G4_Up
chr1	13808542	13808942	G4_Up
chr1	14420800	14421200	G4_Up
chr1	14631915	14632315	G4_Up
chr1	15852383	15852783	G4_Up
chr1	16824060	16824460	G4_Up
chr1	17931624	17932024	G4_Up
chr1	19300113	19300513	G4_Up
chr1	20589164	20589564	G4_Up
chr1	20809944	20810344	G4_Up
chr1	20867553	20867953	G4_Up
chr1	21067485	21067885	G4_Up
chr1	23047144	23047544	G4_Up
chr1	23058373	23058773	G4_Up
chr1	23520475	23520875	G4_Up
chr1	24100986	24101386	G4_Up
chr1	25228590	25228990	G4_Up
chr1	30794589	30794989	G4_Up
chr1	30832724	30833124	G4_Up
chr1	30881999	30882399	G4_Up
chr1	30949626	30950026	G4_Up
chr1	32503562	32503962	G4_Up
chr1	33484256	33484656	G4_Up
chr1	33636275	33636675	G4_Up
chr1	33637791	33638191	G4_Up
chr1	33926886	33927286	G4_Up
chr1	33966981	33967381	G4_Up
chr1	33989855	33990255	G4_Up
chr1	34038529	34038929	G4_Up
chr1	34072334	34072734	G4_Up
chr1	34077090	34077490	G4_Up
chr1	34106969	34107369	G4_Up
chr1	34108614	34109014	G4_Up
chr1	34112929	34113329	G4_Up
chr1	34138091	34138491	G4_Up
chr1	34143476	34143876	G4_Up
chr1	34228855	34229255	G4_Up
chr1	34233644	34234044	G4_Up
chr1	34251861	34252261	G4_Up
chr1	34434852	34435252	G4_Up
chr1	34513080	34513480	G4_Up
chr1	34749318	34749718	G4_Up
chr1	34862876	34863276	G4_Up
chr1	35115027	35115427	G4_Up
chr1	35923257	35923657	G4_Up
chr1	36054616	36055016	G4_Up
chr1	36059319	36059719	G4_Up
chr1	36066596	36066996	G4_Up
chr1	36082498	36082898	G4_Up
chr1	36105834	36106234	G4_Up
chr1	36149416	36149816	G4_Up
chr1	36254678	36255078	G4_Up
chr1	36303714	36304114	G4_Up
chr1	36326001	36326401	G4_Up
chr1	36539171	36539571	G4_Up
chr1	36582260	36582660	G4_Up
chr1	36611630	36612030	G4_Up
chr1	36805727	36806127	G4_Up
chr1	36856244	36856644	G4_Up
chr1	36864683	36865083	G4_Up
chr1	36883949	36884632	G4_Up
chr1	36905160	36905560	G4_Up
chr1	36985820	36986220	G4_Up
chr1	37130019	37130419	G4_Up
chr1	37474994	37475394	G4_Up
chr1	37542917	37543317	G4_Up
chr1	37694462	37694862	G4_Up
chr1	37696578	37696978	G4_Up
chr1	38001991	38002391	G4_Up
chr1	38003919	38004319	G4_Up
chr1	38132496	38132896	G4_Up
chr1	38394536	38394936	G4_Up
chr1	38854818	38855218	G4_Up
chr1	39292028	39292428	G4_Up
chr1	39922822	39923222	G4_Up
chr1	39931235	39931635	G4_Up
chr1	40030836	40031236	G4_Up
chr1	40057769	40058169	G4_Up
chr1	41016935	41017335	G4_Up
chr1	41140568	41140968	G4_Up
chr1	42524948	42525348	G4_Up
chr1	43292869	43293269	G4_Up
chr1	43578120	43578520	G4_Up
chr1	44039717	44040117	G4_Up
chr1	44331723	44332123	G4_Up
chr1	45575133	45575533	G4_Up
chr1	45796036	45796436	G4_Up
chr1	45868868	45869268	G4_Up
chr1	45934995	45935395	G4_Up
chr1	46048260	46048660	G4_Up
chr1	47007766	47008166	G4_Up
chr1	47119721	47120121	G4_Up
chr1	47217253	47217653	G4_Up
chr1	48170528	48170928	G4_Up
chr1	48592172	48592572	G4_Up
chr1	51423396	51423796	G4_Up
chr1	51879273	51879673	G4_Up
chr1	51913023	51913423	G4_Up
chr1	52007609	52008009	G4_Up
chr1	52233147	52233547	G4_Up
chr1	53352504	53352904	G4_Up
chr1	54040096	54040496	G4_Up
chr1	54052838	54053238	G4_Up
chr1	54251324	54251724	G4_Up
chr1	54484886	54485286	G4_Up
chr1	55082500	55082900	G4_Up
chr1	55130125	55130525	G4_Up
chr1	55198810	55199210	G4_Up
chr1	55957768	55958168	G4_Up
chr1	56955529	56955929	G4_Up
chr1	57470267	57470667	G4_Up
chr1	57758662	57759062	G4_Up
chr1	57938884	57939284	G4_Up
chr1	59696955	59697355	G4_Up
chr1	59739283	59739683	G4_Up
chr1	60408000	60408400	G4_Up
chr1	60850987	60851387	G4_Up
chr1	60853502	60853902	G4_Up
chr1	60857622	60858022	G4_Up
chr1	61121578	61121978	G4_Up
chr1	62637559	62637959	G4_Up
chr1	62702211	62702611	G4_Up
chr1	62736655	62737055	G4_Up
chr1	62752898	62753298	G4_Up
chr1	62767635	62768035	G4_Up
chr1	63058554	63058954	G4_Up
chr1	63175132	63175532	G4_Up
chr1	63203209	63203609	G4_Up
chr1	63213924	63214324	G4_Up
chr1	64301377	64301777	G4_Up
chr1	64531014	64531414	G4_Up
chr1	64614951	64615351	G4_Up
chr1	64732684	64733084	G4_Up
chr1	65277743	65278143	G4_Up
chr1	65340994	65341394	G4_Up
chr1	66700145	66700545	G4_Up
chr1	66845862	66846262	G4_Up
chr1	66867651	66868051	G4_Up
chr1	66868429	66868829	G4_Up
chr1	68891566	68891966	G4_Up
chr1	69886196	69886596	G4_Up
chr1	71103515	71103915	G4_Up
chr1	71641788	71642188	G4_Up
chr1	71672398	71672798	G4_Up
chr1	71741277	71741677	G4_Up
chr1	72158782	72159182	G4_Up
chr1	72172812	72173212	G4_Up
chr1	72213964	72214364	G4_Up
chr1	72228995	72229395	G4_Up
chr1	72232918	72233318	G4_Up
chr1	72243730	72244130	G4_Up
chr1	73668891	73669291	G4_Up
chr1	73995252	73995887	G4_Up
chr1	74330220	74330620	G4_Up
chr1	74389657	74390417	G4_Up
chr1	74555599	74555999	G4_Up
chr1	74571447	74571847	G4_Up
chr1	74759826	74760226	G4_Up
chr1	74824788	74825188	G4_Up
chr1	74946213	74946613	G4_Up
chr1	75180823	75181223	G4_Up
chr1	75315847	75316247	G4_Up
chr1	75366808	75367208	G4_Up
chr1	75423968	75424368	G4_Up
chr1	75551793	75552193	G4_Up
chr1	75660413	75660813	G4_Up
chr1	76077382	76077782	G4_Up
chr1	77441396	77441796	G4_Up
chr1	77447034	77447434	G4_Up
chr1	77711612	77712012	G4_Up
chr1	78182073	78182473	G4_Up
chr1	78199279	78199679	G4_Up
chr1	80377372	80377772	G4_Up
chr1	81593611	81594011	G4_Up
chr1	82787447	82787847	G4_Up
chr1	83558260	83558660	G4_Up
chr1	84129861	84130261	G4_Up
chr1	84834087	84834487	G4_Up
chr1	84848781	84849181	G4_Up
chr1	84859624	84860024	G4_Up
chr1	86057093	86057493	G4_Up
chr1	86072938	86073338	G4_Up
chr1	86088382	86088782	G4_Up
chr1	86357006	86357406	G4_Up
chr1	86365463	86365863	G4_Up
chr1	86465403	86465803	G4_Up
chr1	87099841	87100241	G4_Up
chr1	87511184	87511584	G4_Up
chr1	87568428	87568828	G4_Up
chr1	87669690	87670090	G4_Up
chr1	87676042	87676442	G4_Up
chr1	87700193	87700593	G4_Up
chr1	87714993	87715393	G4_Up
chr1	88213099	88213499	G4_Up
chr1	88223582	88223982	G4_Up
chr1	88299231	88299631	G4_Up
chr1	88839422	88839822	G4_Up
chr1	89092645	89093045	G4_Up
chr1	89112854	89113254	G4_Up
chr1	89114657	89115057	G4_Up
chr1	89183343	89183743	G4_Up
chr1	89235195	89235595	G4_Up
chr1	89465530	89465930	G4_Up
chr1	89480305	89480705	G4_Up
chr1	90063289	90063689	G4_Up
chr1	90268042	90268442	G4_Up
chr1	90431489	90431889	G4_Up
chr1	90524655	90525055	G4_Up
chr1	91310231	91310631	G4_Up
chr1	91319888	91320288	G4_Up
chr1	91337633	91338033	G4_Up
chr1	91963332	91963732	G4_Up
chr1	92437542	92437942	G4_Up
chr1	92708675	92709075	G4_Up
chr1	92846211	92846611	G4_Up
chr1	93039287	93039687	G4_Up
chr1	93053930	93054330	G4_Up
chr1	93128487	93128887	G4_Up
chr1	93151632	93152032	G4_Up
chr1	93275390	93275790	G4_Up
chr1	93621426	93621826	G4_Up
chr1	93687495	93688199	G4_Up
chr1	93759513	93759913	G4_Up
chr1	93761581	93761981	G4_Up
chr1	93785686	93786086	G4_Up
chr1	93818590	93818990	G4_Up
chr1	94021235	94021635	G4_Up
chr1	94039225	94039625	G4_Up
chr1	94081063	94081463	G4_Up
chr1	97634120	97634520	G4_Up
chr1	100661867	100662267	G4_Up
chr1	102412686	102413086	G4_Up
chr1	103095642	103096042	G4_Up
chr1	105013186	105013586	G4_Up
chr1	105238154	105238554	G4_Up
chr1	106496268	106496668	G4_Up
chr1	109032171	109032571	G4_Up
chr1	110774287	110774687	G4_Up
chr1	110774764	110775164	G4_Up
chr1	111115609	111116009	G4_Up
chr1	113150868	113151268	G4_Up
chr1	113956337	113956737	G4_Up
chr1	114849719	114850119	G4_Up
chr1	117487474	117487874	G4_Up
chr1	118422816	118423216	G4_Up
chr1	118460863	118461263	G4_Up
chr1	118531900	118532300	G4_Up
chr1	118863629	118864029	G4_Up
chr1	118867593	118867993	G4_Up
chr1	118873537	118873937	G4_Up
chr1	118880759	118881159	G4_Up
chr1	118917936	118918336	G4_Up
chr1	118973503	118973903	G4_Up
chr1	119048720	119049120	G4_Up
chr1	119077845	119078245	G4_Up
chr1	119085832	119086232	G4_Up
chr1	119202219	119202619	G4_Up
chr1	119209494	119209894	G4_Up
chr1	119265275	119265675	G4_Up
chr1	119391742	119392142	G4_Up
chr1	119400149	119400549	G4_Up
chr1	119425186	119425586	G4_Up
chr1	119523948	119524348	G4_Up
chr1	119634731	119635131	G4_Up
chr1	120042377	120042777	G4_Up
chr1	120050776	120051176	G4_Up
chr1	120265106	120265506	G4_Up
chr1	120390422	120390822	G4_Up
chr1	121588616	121589016	G4_Up
chr1	127370818	127371218	G4_Up
chr1	127771824	127772224	G4_Up
chr1	127988372	127988772	G4_Up
chr1	128000915	128001315	G4_Up
chr1	128298543	128298943	G4_Up
chr1	128400374	128400774	G4_Up
chr1	128441044	128441444	G4_Up
chr1	128593172	128593572	G4_Up
chr1	129106913	129107313	G4_Up
chr1	130804470	130804870	G4_Up
chr1	130838740	130839140	G4_Up
chr1	131161087	131161487	G4_Up
chr1	131229058	131229458	G4_Up
chr1	131238106	131238506	G4_Up
chr1	131290632	131291032	G4_Up
chr1	131820515	131820915	G4_Up
chr1	131834066	131834466	G4_Up
chr1	131890278	131890678	G4_Up
chr1	131914777	131915177	G4_Up
chr1	131981625	131982025	G4_Up
chr1	132029428	132029828	G4_Up
chr1	132541181	132541581	G4_Up
chr1	132606548	132606948	G4_Up
chr1	132899045	132899445	G4_Up
chr1	133033791	133034191	G4_Up
chr1	133068330	133068730	G4_Up
chr1	133075538	133075938	G4_Up
chr1	133148681	133149081	G4_Up
chr1	133162950	133163350	G4_Up
chr1	133176097	133176497	G4_Up
chr1	133356178	133356578	G4_Up
chr1	133367433	133367833	G4_Up
chr1	133406550	133406950	G4_Up
chr1	133527811	133528211	G4_Up
chr1	133662995	133663395	G4_Up
chr1	133664081	133664481	G4_Up
chr1	133741127	133741527	G4_Up
chr1	133745082	133745482	G4_Up
chr1	133874459	133874859	G4_Up
chr1	134047502	134047902	G4_Up
chr1	134076313	134076713	G4_Up
chr1	134399800	134400200	G4_Up
chr1	134536116	134536516	G4_Up
chr1	134566002	134566402	G4_Up
chr1	134593254	134593654	G4_Up
chr1	134854402	134854802	G4_Up
chr1	134971705	134972105	G4_Up
chr1	135140432	135140832	G4_Up
chr1	135167135	135167535	G4_Up
chr1	135198967	135199367	G4_Up
chr1	135256726	135257126	G4_Up
chr1	135585604	135586004	G4_Up
chr1	135672012	135672412	G4_Up
chr1	135746641	135747041	G4_Up
chr1	135770917	135771317	G4_Up
chr1	135845891	135846291	G4_Up
chr1	136017209	136017609	G4_Up
chr1	136061373	136061773	G4_Up
chr1	136084124	136084524	G4_Up
chr1	136162239	136162639	G4_Up
chr1	136166690	136167090	G4_Up
chr1	136485575	136485975	G4_Up
chr1	136605168	136605568	G4_Up
chr1	136675047	136675447	G4_Up
chr1	137223864	137224264	G4_Up
chr1	138990512	138990912	G4_Up
chr1	139161619	139162019	G4_Up
chr1	140429327	140429727	G4_Up
chr1	143265233	143265633	G4_Up
chr1	143555473	143555873	G4_Up
chr1	143733270	143733670	G4_Up
chr1	145113188	145113588	G4_Up
chr1	149730603	149731003	G4_Up
chr1	150010347	150010747	G4_Up
chr1	151086400	151086800	G4_Up
chr1	151471422	151471822	G4_Up
chr1	151649037	151649437	G4_Up
chr1	152822975	152823375	G4_Up
chr1	152845244	152845644	G4_Up
chr1	152915766	152916166	G4_Up
chr1	152917644	152918044	G4_Up
chr1	153009476	153009876	G4_Up
chr1	153300948	153301348	G4_Up
chr1	153513381	153513781	G4_Up
chr1	153902962	153903362	G4_Up
chr1	153999345	153999745	G4_Up
chr1	154474238	154474638	G4_Up
chr1	154493273	154493673	G4_Up
chr1	155112455	155112855	G4_Up
chr1	155388607	155389007	G4_Up
chr1	155781333	155781733	G4_Up
chr1	156615596	156615996	G4_Up
chr1	156620477	156620877	G4_Up
chr1	156724700	156725100	G4_Up
chr1	156770231	156770631	G4_Up
chr1	156983320	156983720	G4_Up
chr1	158621125	158621525	G4_Up
chr1	160058516	160058916	G4_Up
chr1	160309943	160310343	G4_Up
chr1	160650224	160650624	G4_Up
chr1	160652771	160653171	G4_Up
chr1	161160277	161160677	G4_Up
chr1	161172316	161172716	G4_Up
chr1	161246817	161247217	G4_Up
chr1	161248190	161248590	G4_Up
chr1	161400041	161400441	G4_Up
chr1	161962438	161962838	G4_Up
chr1	163277712	163278112	G4_Up
chr1	163494828	163495228	G4_Up
chr1	163905468	163905868	G4_Up
chr1	164184379	164184779	G4_Up
chr1	164373201	164373601	G4_Up
chr1	164377161	164377561	G4_Up
chr1	164503325	164503725	G4_Up
chr1	165182245	165182645	G4_Up
chr1	165651508	165651908	G4_Up
chr1	165652543	165652943	G4_Up
chr1	165824269	165824669	G4_Up
chr1	165883623	165884023	G4_Up
chr1	165994149	165994549	G4_Up
chr1	166295432	166295832	G4_Up
chr1	166296245	166296645	G4_Up
chr1	167264979	167265379	G4_Up
chr1	167270696	167271096	G4_Up
chr1	167289113	167289513	G4_Up
chr1	167466876	167467276	G4_Up
chr1	168395529	168396262	G4_Up
chr1	168405032	168405432	G4_Up
chr1	168434589	168434989	G4_Up
chr1	168490113	168490513	G4_Up
chr1	168772131	168772531	G4_Up
chr1	170111891	170112291	G4_Up
chr1	170692194	170692594	G4_Up
chr1	170871407	170871807	G4_Up
chr1	170963386	170963786	G4_Up
chr1	171044390	171044790	G4_Up
chr1	171046529	171046929	G4_Up
chr1	171283801	171284201	G4_Up
chr1	171318706	171319106	G4_Up
chr1	171333904	171334304	G4_Up
chr1	171341725	171342125	G4_Up
chr1	171416907	171417307	G4_Up
chr1	172028991	172029391	G4_Up
chr1	172030014	172030414	G4_Up
chr1	172134544	172134944	G4_Up
chr1	172311353	172311753	G4_Up
chr1	172466803	172467203	G4_Up
chr1	172485316	172485716	G4_Up
chr1	172556554	172556954	G4_Up
chr1	172630937	172631337	G4_Up
chr1	172748253	172748653	G4_Up
chr1	173981047	173981447	G4_Up
chr1	175040085	175040485	G4_Up
chr1	175891729	175892129	G4_Up
chr1	176071978	176072378	G4_Up
chr1	176268926	176269326	G4_Up
chr1	176853461	176853861	G4_Up
chr1	177134353	177134753	G4_Up
chr1	177984438	177984838	G4_Up
chr1	178277920	178278320	G4_Up
chr1	178309749	178310149	G4_Up
chr1	178366690	178367090	G4_Up
chr1	178572011	178572411	G4_Up
chr1	178762011	178762411	G4_Up
chr1	178910949	178911349	G4_Up
chr1	179042367	179042767	G4_Up
chr1	179093390	179093790	G4_Up
chr1	179198797	179199197	G4_Up
chr1	179441846	179442246	G4_Up
chr1	179513381	179513781	G4_Up
chr1	180283950	180284350	G4_Up
chr1	180387441	180387841	G4_Up
chr1	180413076	180413476	G4_Up
chr1	180413672	180414072	G4_Up
chr1	180548783	180549183	G4_Up
chr1	180571216	180571616	G4_Up
chr1	180577401	180577801	G4_Up
chr1	180859882	180860282	G4_Up
chr1	181459273	181459673	G4_Up
chr1	181948253	181948653	G4_Up
chr1	181967053	181967453	G4_Up
chr1	182032533	182032933	G4_Up
chr1	182138996	182139396	G4_Up
chr1	182149000	182149400	G4_Up
chr1	182500453	182500853	G4_Up
chr1	182918431	182918831	G4_Up
chr1	182946988	182947388	G4_Up
chr1	183095359	183095759	G4_Up
chr1	183669293	183669693	G4_Up
chr1	184565177	184565577	G4_Up
chr1	184672514	184672914	G4_Up
chr1	184972038	184972438	G4_Up
chr1	186510489	186510889	G4_Up
chr1	186743681	186744081	G4_Up
chr1	186922739	186923139	G4_Up
chr1	187125918	187126318	G4_Up
chr1	187348602	187349002	G4_Up
chr1	187620579	187620979	G4_Up
chr1	187917775	187918175	G4_Up
chr1	188218915	188219315	G4_Up
chr1	188418532	188418932	G4_Up
chr1	188854225	188854625	G4_Up
chr1	189739800	189740200	G4_Up
chr1	189762852	189763252	G4_Up
chr1	189767791	189768191	G4_Up
chr1	189778312	189778712	G4_Up
chr1	189852736	189853136	G4_Up
chr1	190279575	190279975	G4_Up
chr1	190517900	190518300	G4_Up
chr1	190849608	190850008	G4_Up
chr1	190860177	190860577	G4_Up
chr1	190926272	190926672	G4_Up
chr1	191085584	191085984	G4_Up
chr1	191338836	191339236	G4_Up
chr1	191419448	191419848	G4_Up
chr1	191576936	191577336	G4_Up
chr1	191834773	191835173	G4_Up
chr1	192741250	192741650	G4_Up
chr1	192847257	192847657	G4_Up
chr1	193156078	193156478	G4_Up
chr1	193418372	193418772	G4_Up
chr1	193508199	193508599	G4_Up
chr1	193513974	193514374	G4_Up
chr1	193539896	193540296	G4_Up
chr1	193550981	193551381	G4_Up
chr1	194056105	194056505	G4_Up
chr1	194505768	194506168	G4_Up
chr1	194616181	194616581	G4_Up
chr1	194626178	194626578	G4_Up
chr1	194809460	194809860	G4_Up
chr1	194816902	194817302	G4_Up
chr1	195018947	195019570	G4_Up
chr2	3099704	3100104	G4_Up
chr2	3743345	3743745	G4_Up
chr2	3754787	3755187	G4_Up
chr2	4542961	4543361	G4_Up
chr2	4602139	4602539	G4_Up
chr2	4909782	4910182	G4_Up
chr2	4989860	4990260	G4_Up
chr2	5027836	5028236	G4_Up
chr2	5246404	5246804	G4_Up
chr2	5810970	5811370	G4_Up
chr2	6075141	6075541	G4_Up
chr2	9646917	9647317	G4_Up
chr2	9872700	9873100	G4_Up
chr2	9935933	9936333	G4_Up
chr2	10362455	10362855	G4_Up
chr2	11949119	11949519	G4_Up
chr2	12423500	12423900	G4_Up
chr2	13372230	13372630	G4_Up
chr2	14041657	14042057	G4_Up
chr2	14702205	14702605	G4_Up
chr2	17704244	17704644	G4_Up
chr2	18461675	18462075	G4_Up
chr2	18608369	18608769	G4_Up
chr2	20597237	20597637	G4_Up
chr2	20666021	20666421	G4_Up
chr2	20737918	20738318	G4_Up
chr2	20923059	20923459	G4_Up
chr2	20961204	20961604	G4_Up
chr2	21261619	21262019	G4_Up
chr2	21793180	21793580	G4_Up
chr2	24774233	24774633	G4_Up
chr2	25157069	25157469	G4_Up
chr2	26167940	26168340	G4_Up
chr2	26207415	26207815	G4_Up
chr2	27044193	27044593	G4_Up
chr2	27448405	27448805	G4_Up
chr2	27710430	27710830	G4_Up
chr2	27734293	27734693	G4_Up
chr2	28242870	28243270	G4_Up
chr2	29064110	29064510	G4_Up
chr2	29260806	29261206	G4_Up
chr2	29563584	29563984	G4_Up
chr2	29628261	29628661	G4_Up
chr2	29783239	29783639	G4_Up
chr2	30094942	30095342	G4_Up
chr2	30244702	30245102	G4_Up
chr2	30339658	30340058	G4_Up
chr2	30418181	30418581	G4_Up
chr2	30441725	30442125	G4_Up
chr2	30479163	30479563	G4_Up
chr2	30698391	30698791	G4_Up
chr2	30918276	30918676	G4_Up
chr2	30985965	30986365	G4_Up
chr2	31087604	31088004	G4_Up
chr2	31144121	31144521	G4_Up
chr2	31147172	31147572	G4_Up
chr2	31158218	31158618	G4_Up
chr2	31485206	31485606	G4_Up
chr2	31537272	31537672	G4_Up
chr2	32004922	32005322	G4_Up
chr2	32064736	32065136	G4_Up
chr2	32103401	32103801	G4_Up
chr2	32200574	32200974	G4_Up
chr2	32257008	32257408	G4_Up
chr2	32388832	32389232	G4_Up
chr2	32537252	32537652	G4_Up
chr2	32799430	32799830	G4_Up
chr2	33444900	33445300	G4_Up
chr2	33614537	33614937	G4_Up
chr2	33816329	33816729	G4_Up
chr2	34911007	34911407	G4_Up
chr2	35398382	35398782	G4_Up
chr2	35496423	35496823	G4_Up
chr2	35507203	35507603	G4_Up
chr2	35634178	35634578	G4_Up
chr2	35664991	35665391	G4_Up
chr2	35698128	35698528	G4_Up
chr2	35706053	35706453	G4_Up
chr2	35723573	35723973	G4_Up
chr2	36044585	36044985	G4_Up
chr2	36322353	36322753	G4_Up
chr2	38375857	38376257	G4_Up
chr2	38585325	38585725	G4_Up
chr2	38593256	38593656	G4_Up
chr2	38983975	38984375	G4_Up
chr2	39261053	39261453	G4_Up
chr2	43732344	43732744	G4_Up
chr2	49611149	49611549	G4_Up
chr2	49790157	49790557	G4_Up
chr2	50127746	50128146	G4_Up
chr2	55422185	55422585	G4_Up
chr2	59121075	59121475	G4_Up
chr2	59227491	59227891	G4_Up
chr2	59631668	59632068	G4_Up
chr2	59633844	59634244	G4_Up
chr2	59784223	59784623	G4_Up
chr2	62018114	62018514	G4_Up
chr2	62408648	62409048	G4_Up
chr2	65248750	65249150	G4_Up
chr2	65410256	65410656	G4_Up
chr2	69132078	69132478	G4_Up
chr2	69895632	69896032	G4_Up
chr2	71167081	71167481	G4_Up
chr2	71690526	71690926	G4_Up
chr2	73054216	73054616	G4_Up
chr2	74066665	74067065	G4_Up
chr2	74673921	74674321	G4_Up
chr2	75697279	75697679	G4_Up
chr2	75861086	75861486	G4_Up
chr2	75869514	75869914	G4_Up
chr2	75991876	75992276	G4_Up
chr2	76442110	76442510	G4_Up
chr2	82054161	82054561	G4_Up
chr2	84473976	84474376	G4_Up
chr2	84579250	84579650	G4_Up
chr2	85046433	85046833	G4_Up
chr2	85061828	85062228	G4_Up
chr2	90499678	90500078	G4_Up
chr2	90560050	90560450	G4_Up
chr2	90982204	90982604	G4_Up
chr2	91048652	91049052	G4_Up
chr2	91161239	91161639	G4_Up
chr2	91619805	91620205	G4_Up
chr2	91667826	91668226	G4_Up
chr2	92372368	92372768	G4_Up
chr2	92429646	92430046	G4_Up
chr2	93190903	93191303	G4_Up
chr2	93422754	93423154	G4_Up
chr2	101961530	101961930	G4_Up
chr2	103310691	103311091	G4_Up
chr2	105665408	105665808	G4_Up
chr2	105680526	105680926	G4_Up
chr2	110008717	110009117	G4_Up
chr2	113239110	113239510	G4_Up
chr2	116980697	116981097	G4_Up
chr2	117323863	117324263	G4_Up
chr2	118629880	118630280	G4_Up
chr2	118883262	118883662	G4_Up
chr2	119051468	119051868	G4_Up
chr2	119290064	119290464	G4_Up
chr2	119463093	119463493	G4_Up
chr2	119486459	119486859	G4_Up
chr2	120010663	120011063	G4_Up
chr2	120058924	120059324	G4_Up
chr2	120301535	120301935	G4_Up
chr2	121302343	121302743	G4_Up
chr2	121379003	121379403	G4_Up
chr2	121624973	121625373	G4_Up
chr2	122286223	122286623	G4_Up
chr2	122355423	122355823	G4_Up
chr2	126595122	126595522	G4_Up
chr2	126619461	126619861	G4_Up
chr2	127123958	127124358	G4_Up
chr2	127300703	127301103	G4_Up
chr2	128209761	128210161	G4_Up
chr2	128211850	128212250	G4_Up
chr2	128373486	128373886	G4_Up
chr2	130306232	130306632	G4_Up
chr2	130393022	130393422	G4_Up
chr2	131036371	131036771	G4_Up
chr2	131297339	131297739	G4_Up
chr2	131483619	131484019	G4_Up
chr2	132206357	132206757	G4_Up
chr2	132270532	132270932	G4_Up
chr2	132271266	132271666	G4_Up
chr2	132302175	132302575	G4_Up
chr2	132880910	132881310	G4_Up
chr2	135334688	135335088	G4_Up
chr2	135559329	135559729	G4_Up
chr2	136884258	136884658	G4_Up
chr2	137100985	137101385	G4_Up
chr2	139937593	139937993	G4_Up
chr2	140037555	140037955	G4_Up
chr2	140763323	140763723	G4_Up
chr2	140830222	140830622	G4_Up
chr2	141975150	141975550	G4_Up
chr2	143117387	143117787	G4_Up
chr2	143118240	143118640	G4_Up
chr2	143679522	143679922	G4_Up
chr2	144078440	144078840	G4_Up
chr2	144177224	144177624	G4_Up
chr2	144859983	144860383	G4_Up
chr2	146063456	146063856	G4_Up
chr2	146303123	146303523	G4_Up
chr2	149751457	149751857	G4_Up
chr2	150023891	150024291	G4_Up
chr2	150978185	150978585	G4_Up
chr2	151959320	151959720	G4_Up
chr2	151967253	151967653	G4_Up
chr2	151970788	151971188	G4_Up
chr2	152013456	152013856	G4_Up
chr2	152685725	152686125	G4_Up
chr2	153168145	153168545	G4_Up
chr2	153587765	153588165	G4_Up
chr2	154467161	154467561	G4_Up
chr2	154904123	154904523	G4_Up
chr2	155493349	155493749	G4_Up
chr2	155499769	155500169	G4_Up
chr2	155985293	155985693	G4_Up
chr2	156016164	156016564	G4_Up
chr2	156194619	156195019	G4_Up
chr2	156406201	156406601	G4_Up
chr2	156406982	156407382	G4_Up
chr2	156726507	156726907	G4_Up
chr2	157422959	157423359	G4_Up
chr2	157558450	157558850	G4_Up
chr2	160220693	160221093	G4_Up
chr2	163042362	163042762	G4_Up
chr2	164746691	164747091	G4_Up
chr2	164761390	164761790	G4_Up
chr2	164807242	164807642	G4_Up
chr2	164942768	164943168	G4_Up
chr2	165159087	165159487	G4_Up
chr2	165286360	165286760	G4_Up
chr2	165296443	165296843	G4_Up
chr2	165823063	165823463	G4_Up
chr2	165859474	165859874	G4_Up
chr2	165906313	165906713	G4_Up
chr2	166075976	166076376	G4_Up
chr2	166488365	166488765	G4_Up
chr2	167211995	167212395	G4_Up
chr2	167530000	167530400	G4_Up
chr2	167686394	167686794	G4_Up
chr2	167779948	167780348	G4_Up
chr2	168004891	168005291	G4_Up
chr2	168275517	168275917	G4_Up
chr2	168425072	168425472	G4_Up
chr2	168527584	168527984	G4_Up
chr2	168681348	168681748	G4_Up
chr2	168780579	168780979	G4_Up
chr2	168989923	168990323	G4_Up
chr2	170354987	170355387	G4_Up
chr2	170469529	170469929	G4_Up
chr2	171714195	171714595	G4_Up
chr2	172703542	172703942	G4_Up
chr2	172778282	172778682	G4_Up
chr2	172998421	172998821	G4_Up
chr2	173025442	173025842	G4_Up
chr2	173225974	173226757	G4_Up
chr2	173232040	173232440	G4_Up
chr2	173594109	173594509	G4_Up
chr2	174261392	174261792	G4_Up
chr2	178552697	178553097	G4_Up
chr2	178632821	178633221	G4_Up
chr2	179523933	179524333	G4_Up
chr2	179903007	179903407	G4_Up
chr2	179979895	179980295	G4_Up
chr2	180030252	180030652	G4_Up
chr2	180085531	180085931	G4_Up
chr2	180296324	180296724	G4_Up
chr2	180914718	180915118	G4_Up
chr2	180953548	180953948	G4_Up
chr2	181384048	181384448	G4_Up
chr2	181463039	181463439	G4_Up
chr2	181522951	181523351	G4_Up
chr3	4532788	4533188	G4_Up
chr3	6047257	6047657	G4_Up
chr3	6100761	6101161	G4_Up
chr3	6173718	6174118	G4_Up
chr3	7367672	7368072	G4_Up
chr3	8763076	8763476	G4_Up
chr3	8925807	8926207	G4_Up
chr3	9244155	9244555	G4_Up
chr3	9567842	9568242	G4_Up
chr3	9601264	9601664	G4_Up
chr3	9844309	9844709	G4_Up
chr3	10342448	10342848	G4_Up
chr3	12603916	12604316	G4_Up
chr3	14871337	14871737	G4_Up
chr3	14999906	15000306	G4_Up
chr3	16198014	16198414	G4_Up
chr3	18617739	18618139	G4_Up
chr3	18827241	18827641	G4_Up
chr3	22990407	22990807	G4_Up
chr3	23547572	23547972	G4_Up
chr3	23939501	23939901	G4_Up
chr3	25450446	25450846	G4_Up
chr3	27598756	27599156	G4_Up
chr3	27968699	27969099	G4_Up
chr3	28091323	28091723	G4_Up
chr3	30646776	30647176	G4_Up
chr3	31001241	31001641	G4_Up
chr3	31031567	31031967	G4_Up
chr3	31093262	31093662	G4_Up
chr3	31145843	31146243	G4_Up
chr3	32337997	32338397	G4_Up
chr3	32725850	32726250	G4_Up
chr3	32822785	32823185	G4_Up
chr3	34007570	34007970	G4_Up
chr3	34446288	34446688	G4_Up
chr3	36175004	36175404	G4_Up
chr3	37657070	37657470	G4_Up
chr3	37687177	37687577	G4_Up
chr3	38226110	38226510	G4_Up
chr3	40453617	40454017	G4_Up
chr3	40728628	40729028	G4_Up
chr3	40829918	40830318	G4_Up
chr3	41605971	41606371	G4_Up
chr3	45681410	45681810	G4_Up
chr3	46744955	46745355	G4_Up
chr3	51117557	51117957	G4_Up
chr3	51373618	51374018	G4_Up
chr3	51590096	51590820	G4_Up
chr3	51739324	51739724	G4_Up
chr3	52046093	52046493	G4_Up
chr3	54564211	54564611	G4_Up
chr3	55763623	55764023	G4_Up
chr3	59264784	59265184	G4_Up
chr3	59271356	59271756	G4_Up
chr3	60855815	60856215	G4_Up
chr3	63312257	63312657	G4_Up
chr3	63842531	63842931	G4_Up
chr3	66666356	66666756	G4_Up
chr3	75112704	75113104	G4_Up
chr3	75288117	75288517	G4_Up
chr3	75830104	75830504	G4_Up
chr3	79066428	79066828	G4_Up
chr3	79452780	79453180	G4_Up
chr3	79479238	79479638	G4_Up
chr3	83286945	83287345	G4_Up
chr3	87763392	87763792	G4_Up
chr3	87801289	87801689	G4_Up
chr3	87858108	87858508	G4_Up
chr3	88120057	88120457	G4_Up
chr3	88133264	88133664	G4_Up
chr3	88195887	88196287	G4_Up
chr3	88344044	88344444	G4_Up
chr3	88396374	88396774	G4_Up
chr3	88549791	88550191	G4_Up
chr3	88573804	88574204	G4_Up
chr3	88646348	88646748	G4_Up
chr3	88754257	88754657	G4_Up
chr3	89422692	89423092	G4_Up
chr3	89826270	89826670	G4_Up
chr3	90512972	90513372	G4_Up
chr3	90594457	90594857	G4_Up
chr3	95627666	95628066	G4_Up
chr3	96443775	96444175	G4_Up
chr3	96463954	96464354	G4_Up
chr3	96581496	96581896	G4_Up
chr3	101280418	101280818	G4_Up
chr3	101327253	101327653	G4_Up
chr3	101464350	101464750	G4_Up
chr3	101803724	101804124	G4_Up
chr3	101806780	101807180	G4_Up
chr3	102055230	102055630	G4_Up
chr3	102245829	102246229	G4_Up
chr3	103078101	103078501	G4_Up
chr3	105977360	105977760	G4_Up
chr3	108089123	108089523	G4_Up
chr3	108429109	108429509	G4_Up
chr3	109766479	109766879	G4_Up
chr3	111092830	111093230	G4_Up
chr3	115902457	115902857	G4_Up
chr3	116535521	116535921	G4_Up
chr3	116635852	116636252	G4_Up
chr3	118743050	118743450	G4_Up
chr3	119239772	119240172	G4_Up
chr3	119875865	119876265	G4_Up
chr3	121575506	121575906	G4_Up
chr3	121845017	121845417	G4_Up
chr3	122085617	122086017	G4_Up
chr3	122464476	122464876	G4_Up
chr3	122565279	122565679	G4_Up
chr3	124602962	124603362	G4_Up
chr3	127451714	127452114	G4_Up
chr3	127794216	127794616	G4_Up
chr3	129238772	129239172	G4_Up
chr3	129544190	129544590	G4_Up
chr3	129810208	129810608	G4_Up
chr3	130864588	130864988	G4_Up
chr3	131102256	131102656	G4_Up
chr3	131156424	131156824	G4_Up
chr3	131227969	131228369	G4_Up
chr3	131297917	131298317	G4_Up
chr3	131298768	131299168	G4_Up
chr3	131474518	131474918	G4_Up
chr3	131587588	131587988	G4_Up
chr3	131975920	131976320	G4_Up
chr3	132457880	132458280	G4_Up
chr3	133081857	133082257	G4_Up
chr3	133509041	133509441	G4_Up
chr3	134146534	134146934	G4_Up
chr3	136115688	136116088	G4_Up
chr3	136555762	136556162	G4_Up
chr3	137212630	137213030	G4_Up
chr3	137743213	137743613	G4_Up
chr3	137833024	137833424	G4_Up
chr3	138675947	138676347	G4_Up
chr3	138815099	138815499	G4_Up
chr3	141931444	141931844	G4_Up
chr3	142396954	142397354	G4_Up
chr3	142762049	142762449	G4_Up
chr3	142839981	142840381	G4_Up
chr3	144165159	144165559	G4_Up
chr3	144574494	144575271	G4_Up
chr3	144599502	144599902	G4_Up
chr3	145158324	145158724	G4_Up
chr3	145614466	145614866	G4_Up
chr3	146136422	146136822	G4_Up
chr3	148353500	148353900	G4_Up
chr3	152116874	152117274	G4_Up
chr3	152165495	152165895	G4_Up
chr3	153631845	153632245	G4_Up
chr3	153699387	153699787	G4_Up
chr3	153913980	153914380	G4_Up
chr3	155035770	155036170	G4_Up
chr3	156953706	156954106	G4_Up
chr3	157321091	157321491	G4_Up
chr3	158723416	158723816	G4_Up
chr4	3836317	3836717	G4_Up
chr4	4731895	4732295	G4_Up
chr4	5805010	5805410	G4_Up
chr4	6592846	6593246	G4_Up
chr4	7919816	7920216	G4_Up
chr4	8912640	8913040	G4_Up
chr4	10726398	10726798	G4_Up
chr4	10750662	10751062	G4_Up
chr4	10912621	10913021	G4_Up
chr4	10920804	10921204	G4_Up
chr4	10955378	10955778	G4_Up
chr4	11151778	11152178	G4_Up
chr4	11564400	11564800	G4_Up
chr4	14874225	14874625	G4_Up
chr4	15943775	15944175	G4_Up
chr4	16087850	16088250	G4_Up
chr4	18395524	18395924	G4_Up
chr4	18527128	18527528	G4_Up
chr4	19335375	19335775	G4_Up
chr4	19865411	19865811	G4_Up
chr4	21766989	21767389	G4_Up
chr4	22047706	22048106	G4_Up
chr4	22667608	22668008	G4_Up
chr4	23622203	23622603	G4_Up
chr4	24176453	24176853	G4_Up
chr4	26944636	26945036	G4_Up
chr4	29091672	29092072	G4_Up
chr4	31418363	31418763	G4_Up
chr4	33382240	33382640	G4_Up
chr4	33905118	33905518	G4_Up
chr4	34615611	34616011	G4_Up
chr4	41048831	41049231	G4_Up
chr4	41237809	41238209	G4_Up
chr4	45419022	45419422	G4_Up
chr4	45850214	45850614	G4_Up
chr4	46077974	46078374	G4_Up
chr4	46169868	46170268	G4_Up
chr4	46182177	46182577	G4_Up
chr4	46554081	46554481	G4_Up
chr4	46604263	46604663	G4_Up
chr4	46802139	46802539	G4_Up
chr4	47604034	47604434	G4_Up
chr4	51868717	51869117	G4_Up
chr4	53884358	53884758	G4_Up
chr4	54986508	54986908	G4_Up
chr4	55079187	55079587	G4_Up
chr4	55676672	55677072	G4_Up
chr4	56858869	56859269	G4_Up
chr4	56892229	56892629	G4_Up
chr4	56932162	56932562	G4_Up
chr4	57296483	57296883	G4_Up
chr4	57770310	57770710	G4_Up
chr4	59884611	59885011	G4_Up
chr4	59963788	59964188	G4_Up
chr4	62706820	62707220	G4_Up
chr4	63409277	63409677	G4_Up
chr4	63420499	63420899	G4_Up
chr4	64898001	64898401	G4_Up
chr4	65242666	65243066	G4_Up
chr4	70105748	70106148	G4_Up
chr4	73518555	73518955	G4_Up
chr4	75300579	75300979	G4_Up
chr4	81173307	81173707	G4_Up
chr4	81669150	81669550	G4_Up
chr4	83436912	83437312	G4_Up
chr4	83917031	83917431	G4_Up
chr4	84224554	84224954	G4_Up
chr4	84229222	84229622	G4_Up
chr4	85256994	85257394	G4_Up
chr4	86183606	86184006	G4_Up
chr4	86280554	86280954	G4_Up
chr4	87859035	87859435	G4_Up
chr4	88065353	88065753	G4_Up
chr4	91205505	91205905	G4_Up
chr4	95157768	95158168	G4_Up
chr4	95684790	95685190	G4_Up
chr4	97769890	97770290	G4_Up
chr4	97773203	97773603	G4_Up
chr4	98321658	98322058	G4_Up
chr4	98369919	98370319	G4_Up
chr4	98702491	98702891	G4_Up
chr4	98801858	98802258	G4_Up
chr4	98847497	98847897	G4_Up
chr4	98923095	98923495	G4_Up
chr4	99317348	99317748	G4_Up
chr4	99442008	99442408	G4_Up
chr4	99445339	99445739	G4_Up
chr4	99636052	99636452	G4_Up
chr4	99675180	99675580	G4_Up
chr4	99832076	99832476	G4_Up
chr4	99941864	99942264	G4_Up
chr4	100108742	100109142	G4_Up
chr4	100419048	100419448	G4_Up
chr4	100756609	100757009	G4_Up
chr4	100760380	100760780	G4_Up
chr4	101001581	101001981	G4_Up
chr4	101049239	101049639	G4_Up
chr4	101187346	101187746	G4_Up
chr4	101187953	101188353	G4_Up
chr4	101365251	101365651	G4_Up
chr4	101464961	101465361	G4_Up
chr4	101469054	101469454	G4_Up
chr4	101497321	101497721	G4_Up
chr4	101574699	101575099	G4_Up
chr4	101717254	101717654	G4_Up
chr4	101889343	101889743	G4_Up
chr4	102504939	102505339	G4_Up
chr4	102976264	102976664	G4_Up
chr4	103064587	103064987	G4_Up
chr4	103174432	103174832	G4_Up
chr4	103316626	103317026	G4_Up
chr4	103347496	103347896	G4_Up
chr4	103693857	103694257	G4_Up
chr4	103721051	103721451	G4_Up
chr4	103891315	103891715	G4_Up
chr4	104065574	104065974	G4_Up
chr4	104381616	104382016	G4_Up
chr4	104463730	104464130	G4_Up
chr4	104685345	104685745	G4_Up
chr4	105181250	105181942	G4_Up
chr4	105204008	105204408	G4_Up
chr4	105214526	105214926	G4_Up
chr4	105460110	105460510	G4_Up
chr4	105566510	105566910	G4_Up
chr4	105922577	105922977	G4_Up
chr4	105937405	105937805	G4_Up
chr4	105942652	105943052	G4_Up
chr4	106245369	106245769	G4_Up
chr4	106313900	106314300	G4_Up
chr4	106441304	106441704	G4_Up
chr4	106442486	106442886	G4_Up
chr4	106455184	106455584	G4_Up
chr4	106479185	106479585	G4_Up
chr4	106588698	106589098	G4_Up
chr4	106598329	106598729	G4_Up
chr4	106641770	106642170	G4_Up
chr4	106660106	106660506	G4_Up
chr4	106796861	106797261	G4_Up
chr4	106838896	106839296	G4_Up
chr4	106847052	106847452	G4_Up
chr4	106868187	106868587	G4_Up
chr4	106954027	106954427	G4_Up
chr4	106958248	106959038	G4_Up
chr4	106976532	106976932	G4_Up
chr4	107008801	107009201	G4_Up
chr4	107043699	107044099	G4_Up
chr4	107054269	107054669	G4_Up
chr4	107094553	107094953	G4_Up
chr4	107299156	107299556	G4_Up
chr4	107417548	107417948	G4_Up
chr4	107847243	107847643	G4_Up
chr4	107900055	107900455	G4_Up
chr4	108007976	108008376	G4_Up
chr4	108017921	108018321	G4_Up
chr4	108044724	108045124	G4_Up
chr4	108145330	108145730	G4_Up
chr4	108163536	108163936	G4_Up
chr4	108219049	108219449	G4_Up
chr4	108458449	108458849	G4_Up
chr4	108847782	108848182	G4_Up
chr4	108883769	108884169	G4_Up
chr4	108902673	108903073	G4_Up
chr4	109027656	109028056	G4_Up
chr4	109060680	109061080	G4_Up
chr4	109134796	109135196	G4_Up
chr4	109147632	109148032	G4_Up
chr4	109159639	109160039	G4_Up
chr4	109166334	109166734	G4_Up
chr4	109428224	109428624	G4_Up
chr4	109495390	109495790	G4_Up
chr4	109537391	109537791	G4_Up
chr4	109717780	109718180	G4_Up
chr4	109964059	109964459	G4_Up
chr4	110020910	110021310	G4_Up
chr4	110087837	110088237	G4_Up
chr4	110156154	110156554	G4_Up
chr4	110312106	110312506	G4_Up
chr4	111869476	111869876	G4_Up
chr4	111963612	111964012	G4_Up
chr4	114457078	114457820	G4_Up
chr4	114459790	114460190	G4_Up
chr4	114501466	114501866	G4_Up
chr4	114522851	114523251	G4_Up
chr4	114601200	114601600	G4_Up
chr4	114637154	114637554	G4_Up
chr4	114648698	114649098	G4_Up
chr4	114662580	114662980	G4_Up
chr4	114671130	114671530	G4_Up
chr4	114706306	114706706	G4_Up
chr4	114730352	114730752	G4_Up
chr4	114876349	114876749	G4_Up
chr4	115030212	115030612	G4_Up
chr4	115089995	115090395	G4_Up
chr4	115725925	115726325	G4_Up
chr4	115830037	115830437	G4_Up
chr4	115888049	115888449	G4_Up
chr4	116086560	116086960	G4_Up
chr4	116174375	116174775	G4_Up
chr4	116588053	116588453	G4_Up
chr4	116626986	116627386	G4_Up
chr4	116651459	116651859	G4_Up
chr4	116769036	116769436	G4_Up
chr4	116780553	116780953	G4_Up
chr4	116807459	116807859	G4_Up
chr4	116844293	116844693	G4_Up
chr4	116994229	116994629	G4_Up
chr4	117229609	117230009	G4_Up
chr4	117295452	117295852	G4_Up
chr4	117349293	117349693	G4_Up
chr4	117360828	117361228	G4_Up
chr4	117362131	117362531	G4_Up
chr4	117367414	117367814	G4_Up
chr4	117415516	117415916	G4_Up
chr4	117416849	117417249	G4_Up
chr4	117437003	117437403	G4_Up
chr4	117480711	117481111	G4_Up
chr4	117485735	117486135	G4_Up
chr4	117500511	117500911	G4_Up
chr4	117649279	117649679	G4_Up
chr4	117803078	117803478	G4_Up
chr4	117847099	117847499	G4_Up
chr4	117872546	117872946	G4_Up
chr4	117916910	117917310	G4_Up
chr4	117974833	117975233	G4_Up
chr4	118019255	118019655	G4_Up
chr4	118039070	118039470	G4_Up
chr4	118108783	118109183	G4_Up
chr4	118122818	118123218	G4_Up
chr4	118135744	118136144	G4_Up
chr4	118149764	118150164	G4_Up
chr4	118198583	118198983	G4_Up
chr4	118204085	118204485	G4_Up
chr4	118217640	118218040	G4_Up
chr4	118237267	118237667	G4_Up
chr4	118249926	118250326	G4_Up
chr4	118265285	118265685	G4_Up
chr4	118268955	118269355	G4_Up
chr4	118382488	118382888	G4_Up
chr4	118437292	118437692	G4_Up
chr4	118613467	118613867	G4_Up
chr4	119111389	119112172	G4_Up
chr4	119119661	119120061	G4_Up
chr4	119668649	119669049	G4_Up
chr4	120011817	120012217	G4_Up
chr4	120097741	120098475	G4_Up
chr4	120105837	120106623	G4_Up
chr4	120128002	120128402	G4_Up
chr4	120131813	120132213	G4_Up
chr4	120177044	120177444	G4_Up
chr4	120232162	120232562	G4_Up
chr4	120290452	120290852	G4_Up
chr4	120389364	120389764	G4_Up
chr4	120616663	120617063	G4_Up
chr4	120635522	120635922	G4_Up
chr4	120665209	120665609	G4_Up
chr4	120702257	120702657	G4_Up
chr4	120730134	120730534	G4_Up
chr4	120749462	120749862	G4_Up
chr4	120987213	120987613	G4_Up
chr4	121025914	121026314	G4_Up
chr4	121050297	121050697	G4_Up
chr4	121215562	121215962	G4_Up
chr4	121982724	121983124	G4_Up
chr4	122837307	122837707	G4_Up
chr4	123001188	123001588	G4_Up
chr4	123004911	123005311	G4_Up
chr4	123026447	123026847	G4_Up
chr4	123042858	123043258	G4_Up
chr4	123139743	123140143	G4_Up
chr4	123314437	123314837	G4_Up
chr4	123343906	123344306	G4_Up
chr4	123526704	123527104	G4_Up
chr4	123527440	123527840	G4_Up
chr4	123529113	123529513	G4_Up
chr4	123588866	123589266	G4_Up
chr4	123616978	123617378	G4_Up
chr4	123622063	123622463	G4_Up
chr4	123634524	123634924	G4_Up
chr4	123655066	123655466	G4_Up
chr4	123676998	123677398	G4_Up
chr4	123881875	123882275	G4_Up
chr4	123918855	123919255	G4_Up
chr4	124110784	124111184	G4_Up
chr4	124149861	124150261	G4_Up
chr4	124352701	124353101	G4_Up
chr4	124451043	124451443	G4_Up
chr4	124464021	124464421	G4_Up
chr4	124485884	124486284	G4_Up
chr4	124674089	124674489	G4_Up
chr4	124835862	124836262	G4_Up
chr4	124838435	124838835	G4_Up
chr4	124985299	124985699	G4_Up
chr4	125001805	125002205	G4_Up
chr4	125083337	125083737	G4_Up
chr4	125085042	125085442	G4_Up
chr4	125089248	125089648	G4_Up
chr4	125099503	125099903	G4_Up
chr4	125280839	125281239	G4_Up
chr4	125313234	125313634	G4_Up
chr4	125534526	125534926	G4_Up
chr4	125536027	125536427	G4_Up
chr4	125546246	125546646	G4_Up
chr4	125570549	125570949	G4_Up
chr4	125587226	125587626	G4_Up
chr4	125604671	125605071	G4_Up
chr4	125651355	125651755	G4_Up
chr4	125651809	125652209	G4_Up
chr4	125658257	125658657	G4_Up
chr4	125691230	125691630	G4_Up
chr4	125704359	125704759	G4_Up
chr4	125705038	125705438	G4_Up
chr4	125711122	125711522	G4_Up
chr4	125729215	125729615	G4_Up
chr4	125806225	125806625	G4_Up
chr4	125849247	125849647	G4_Up
chr4	125903803	125904203	G4_Up
chr4	125920770	125921170	G4_Up
chr4	125932269	125932669	G4_Up
chr4	126003687	126004087	G4_Up
chr4	126027089	126027489	G4_Up
chr4	126068285	126068685	G4_Up
chr4	126125644	126126044	G4_Up
chr4	126167679	126168421	G4_Up
chr4	126222516	126222916	G4_Up
chr4	126238955	126239355	G4_Up
chr4	126241848	126242248	G4_Up
chr4	126252725	126253125	G4_Up
chr4	126259799	126260199	G4_Up
chr4	126602077	126602477	G4_Up
chr4	126616285	126616685	G4_Up
chr4	126659558	126659958	G4_Up
chr4	126710685	126711085	G4_Up
chr4	126740108	126740508	G4_Up
chr4	126863868	126864268	G4_Up
chr4	127017258	127017658	G4_Up
chr4	127054899	127055299	G4_Up
chr4	127064019	127064419	G4_Up
chr4	127177199	127177599	G4_Up
chr4	127190910	127191310	G4_Up
chr4	127200913	127201313	G4_Up
chr4	127201336	127201736	G4_Up
chr4	127345065	127345465	G4_Up
chr4	127363479	127363879	G4_Up
chr4	127369416	127369816	G4_Up
chr4	127527466	127527866	G4_Up
chr4	127602741	127603141	G4_Up
chr4	127906492	127906892	G4_Up
chr4	127989679	127990079	G4_Up
chr4	128072622	128073022	G4_Up
chr4	128098308	128098708	G4_Up
chr4	128163813	128164213	G4_Up
chr4	128449070	128449470	G4_Up
chr4	128546506	128546906	G4_Up
chr4	128715810	128716210	G4_Up
chr4	128737122	128737522	G4_Up
chr4	128807366	128807766	G4_Up
chr4	128879156	128879556	G4_Up
chr4	129013571	129013971	G4_Up
chr4	129141636	129142036	G4_Up
chr4	129223888	129224288	G4_Up
chr4	129235992	129236392	G4_Up
chr4	129247184	129247584	G4_Up
chr4	129364630	129365030	G4_Up
chr4	129388306	129388706	G4_Up
chr4	129455318	129455718	G4_Up
chr4	129471898	129472298	G4_Up
chr4	129578129	129578529	G4_Up
chr4	129578667	129579067	G4_Up
chr4	129591370	129591770	G4_Up
chr4	129607266	129607666	G4_Up
chr4	129610080	129610480	G4_Up
chr4	129624276	129624676	G4_Up
chr4	129639175	129639575	G4_Up
chr4	129689012	129689412	G4_Up
chr4	129702387	129702787	G4_Up
chr4	129740110	129740510	G4_Up
chr4	129742284	129742684	G4_Up
chr4	129793873	129794273	G4_Up
chr4	129970287	129970687	G4_Up
chr4	129984828	129985228	G4_Up
chr4	130021955	130022355	G4_Up
chr4	130056029	130056429	G4_Up
chr4	130102237	130102637	G4_Up
chr4	130311361	130311761	G4_Up
chr4	130312276	130312676	G4_Up
chr4	130714627	130715027	G4_Up
chr4	130856465	130856865	G4_Up
chr4	130915825	130916225	G4_Up
chr4	132088075	132088475	G4_Up
chr4	132583305	132583705	G4_Up
chr4	132649286	132649686	G4_Up
chr4	132720586	132720986	G4_Up
chr4	133427265	133427665	G4_Up
chr4	133431628	133432028	G4_Up
chr4	133578965	133579365	G4_Up
chr4	133595575	133595975	G4_Up
chr4	133739844	133740244	G4_Up
chr4	133896216	133896616	G4_Up
chr4	133993822	133994222	G4_Up
chr4	134094342	134094742	G4_Up
chr4	134762298	134762698	G4_Up
chr4	135468022	135468422	G4_Up
chr4	136422931	136423331	G4_Up
chr4	137597130	137597530	G4_Up
chr4	137882774	137883174	G4_Up
chr4	138219314	138219714	G4_Up
chr4	138452267	138452667	G4_Up
chr4	138755348	138755748	G4_Up
chr4	139199433	139199833	G4_Up
chr4	139225688	139226088	G4_Up
chr4	139455626	139456026	G4_Up
chr4	139903741	139904141	G4_Up
chr4	140247605	140248005	G4_Up
chr4	140258946	140259346	G4_Up
chr4	140366452	140366852	G4_Up
chr4	140616741	140617141	G4_Up
chr4	140721850	140722250	G4_Up
chr4	140729424	140729824	G4_Up
chr4	140974240	140974640	G4_Up
chr4	141164742	141165142	G4_Up
chr4	141186202	141186602	G4_Up
chr4	141557573	141557973	G4_Up
chr4	141609578	141609978	G4_Up
chr4	142138212	142138612	G4_Up
chr4	142208940	142209340	G4_Up
chr4	142232715	142233115	G4_Up
chr4	142234878	142235278	G4_Up
chr4	142333759	142334159	G4_Up
chr4	148172237	148172637	G4_Up
chr4	148386138	148386538	G4_Up
chr4	149325466	149325866	G4_Up
chr4	149800171	149800571	G4_Up
chr4	149889925	149890325	G4_Up
chr4	149966386	149966786	G4_Up
chr4	150887922	150888322	G4_Up
chr4	151953329	151953729	G4_Up
chr4	152141809	152142209	G4_Up
chr4	152509552	152509952	G4_Up
chr4	154082572	154082972	G4_Up
chr4	155462576	155462976	G4_Up
chr4	155478077	155478477	G4_Up
chr4	155733330	155733730	G4_Up
chr5	3591429	3591829	G4_Up
chr5	3677959	3678359	G4_Up
chr5	4105711	4106111	G4_Up
chr5	4303579	4303979	G4_Up
chr5	8660430	8660830	G4_Up
chr5	9111774	9112174	G4_Up
chr5	9157368	9157768	G4_Up
chr5	9633518	9633918	G4_Up
chr5	9786677	9787077	G4_Up
chr5	12137845	12138245	G4_Up
chr5	12872984	12873384	G4_Up
chr5	13974674	13975074	G4_Up
chr5	14032125	14032525	G4_Up
chr5	16425306	16425706	G4_Up
chr5	18916845	18917245	G4_Up
chr5	19222073	19222473	G4_Up
chr5	20930359	20930759	G4_Up
chr5	20967240	20967640	G4_Up
chr5	25099033	25099433	G4_Up
chr5	25108068	25108468	G4_Up
chr5	25526065	25526465	G4_Up
chr5	25672078	25672478	G4_Up
chr5	27819200	27819600	G4_Up
chr5	29777216	29777616	G4_Up
chr5	31187559	31187959	G4_Up
chr5	31193914	31194314	G4_Up
chr5	31487665	31488065	G4_Up
chr5	33275719	33276119	G4_Up
chr5	33518960	33519360	G4_Up
chr5	34502839	34503239	G4_Up
chr5	34581941	34582341	G4_Up
chr5	35073980	35074380	G4_Up
chr5	35101337	35101737	G4_Up
chr5	35177190	35177590	G4_Up
chr5	35390771	35391171	G4_Up
chr5	36546746	36547146	G4_Up
chr5	38015270	38015670	G4_Up
chr5	38520509	38521243	G4_Up
chr5	38702099	38702499	G4_Up
chr5	43156623	43157023	G4_Up
chr5	52118961	52119361	G4_Up
chr5	53387586	53387986	G4_Up
chr5	53555510	53555910	G4_Up
chr5	53581138	53581538	G4_Up
chr5	58884384	58884784	G4_Up
chr5	60391327	60391727	G4_Up
chr5	63936682	63937082	G4_Up
chr5	64256570	64256970	G4_Up
chr5	64431187	64431587	G4_Up
chr5	64647573	64647973	G4_Up
chr5	65392859	65393259	G4_Up
chr5	65425189	65425589	G4_Up
chr5	65689016	65689416	G4_Up
chr5	66019122	66019522	G4_Up
chr5	66151374	66151774	G4_Up
chr5	66215430	66215830	G4_Up
chr5	66720923	66721323	G4_Up
chr5	66745805	66746205	G4_Up
chr5	67492103	67492503	G4_Up
chr5	72145422	72145822	G4_Up
chr5	73158692	73159092	G4_Up
chr5	73193364	73193764	G4_Up
chr5	73217066	73217466	G4_Up
chr5	73232783	73233183	G4_Up
chr5	73963759	73964159	G4_Up
chr5	75084933	75085333	G4_Up
chr5	75518152	75518552	G4_Up
chr5	76285624	76286024	G4_Up
chr5	76912685	76913085	G4_Up
chr5	86407157	86407557	G4_Up
chr5	89526880	89527280	G4_Up
chr5	90235658	90236058	G4_Up
chr5	90647618	90648018	G4_Up
chr5	91556186	91556586	G4_Up
chr5	91866092	91866492	G4_Up
chr5	92101531	92101931	G4_Up
chr5	92683400	92683800	G4_Up
chr5	92698515	92698915	G4_Up
chr5	92797981	92798381	G4_Up
chr5	92905562	92905962	G4_Up
chr5	92923916	92924316	G4_Up
chr5	93126474	93126874	G4_Up
chr5	93296846	93297246	G4_Up
chr5	97226430	97226830	G4_Up
chr5	99477865	99478265	G4_Up
chr5	99775454	99775854	G4_Up
chr5	99962887	99963287	G4_Up
chr5	100213891	100214291	G4_Up
chr5	101298298	101298698	G4_Up
chr5	103724526	103724926	G4_Up
chr5	103774701	103775101	G4_Up
chr5	103782657	103783057	G4_Up
chr5	104432891	104433291	G4_Up
chr5	105551728	105552128	G4_Up
chr5	105575888	105576288	G4_Up
chr5	105932440	105932840	G4_Up
chr5	106463698	106464098	G4_Up
chr5	107001771	107002171	G4_Up
chr5	108313314	108313714	G4_Up
chr5	110083256	110083656	G4_Up
chr5	110266930	110267330	G4_Up
chr5	111273361	111273761	G4_Up
chr5	111761496	111761896	G4_Up
chr5	113431284	113431684	G4_Up
chr5	113489755	113490155	G4_Up
chr5	113610362	113610762	G4_Up
chr5	113746404	113746804	G4_Up
chr5	113959951	113960351	G4_Up
chr5	114056065	114056465	G4_Up
chr5	114275351	114275751	G4_Up
chr5	114596566	114596966	G4_Up
chr5	115444136	115444536	G4_Up
chr5	115958483	115958883	G4_Up
chr5	115983251	115983651	G4_Up
chr5	116797470	116797870	G4_Up
chr5	116979683	116980083	G4_Up
chr5	117549518	117549918	G4_Up
chr5	118319134	118319534	G4_Up
chr5	118347804	118348517	G4_Up
chr5	118772854	118773254	G4_Up
chr5	119310115	119310515	G4_Up
chr5	119613400	119613800	G4_Up
chr5	119681835	119682235	G4_Up
chr5	119685537	119685937	G4_Up
chr5	120510964	120511364	G4_Up
chr5	120567013	120567413	G4_Up
chr5	120590400	120590800	G4_Up
chr5	121122196	121122596	G4_Up
chr5	121333112	121333512	G4_Up
chr5	121534435	121534835	G4_Up
chr5	121540089	121540489	G4_Up
chr5	121820883	121821283	G4_Up
chr5	121850428	121850828	G4_Up
chr5	121855632	121856032	G4_Up
chr5	121871836	121872236	G4_Up
chr5	121941107	121941507	G4_Up
chr5	122348911	122349311	G4_Up
chr5	122453163	122453563	G4_Up
chr5	122788222	122788622	G4_Up
chr5	123168030	123168430	G4_Up
chr5	123376398	123376798	G4_Up
chr5	124176769	124177169	G4_Up
chr5	125287311	125287711	G4_Up
chr5	125327743	125328143	G4_Up
chr5	125481996	125482396	G4_Up
chr5	125511505	125511905	G4_Up
chr5	128973335	128973735	G4_Up
chr5	129361725	129362125	G4_Up
chr5	129862276	129862676	G4_Up
chr5	130266618	130267018	G4_Up
chr5	130369329	130369729	G4_Up
chr5	131422262	131422662	G4_Up
chr5	133601378	133601778	G4_Up
chr5	134102986	134103386	G4_Up
chr5	134168100	134168500	G4_Up
chr5	134648632	134649032	G4_Up
chr5	134705607	134706007	G4_Up
chr5	135165704	135166104	G4_Up
chr5	135191633	135192033	G4_Up
chr5	135404562	135404962	G4_Up
chr5	135451045	135451445	G4_Up
chr5	135736872	135737272	G4_Up
chr5	135753709	135754109	G4_Up
chr5	135910644	135911044	G4_Up
chr5	137616180	137616580	G4_Up
chr5	137805116	137805516	G4_Up
chr5	138286631	138287031	G4_Up
chr5	138759805	138760205	G4_Up
chr5	138974289	138974689	G4_Up
chr5	138991755	138992155	G4_Up
chr5	139035045	139035445	G4_Up
chr5	139377258	139377658	G4_Up
chr5	139724522	139724922	G4_Up
chr5	140258747	140259147	G4_Up
chr5	140737779	140738179	G4_Up
chr5	142194973	142195373	G4_Up
chr5	142964085	142964485	G4_Up
chr5	143234971	143235371	G4_Up
chr5	143290923	143291323	G4_Up
chr5	144366231	144366631	G4_Up
chr5	144806916	144807316	G4_Up
chr5	144898474	144898874	G4_Up
chr5	146842044	146842444	G4_Up
chr5	146892852	146893252	G4_Up
chr5	146954484	146954884	G4_Up
chr5	147588924	147589324	G4_Up
chr5	147912888	147913288	G4_Up
chr5	149170861	149171261	G4_Up
chr5	149523141	149523541	G4_Up
chr5	149851008	149851408	G4_Up
chr5	150196152	150196552	G4_Up
chr5	150670202	150670602	G4_Up
chr6	3875593	3875993	G4_Up
chr6	4557689	4558089	G4_Up
chr6	4677574	4677974	G4_Up
chr6	4876729	4877129	G4_Up
chr6	5482397	5482797	G4_Up
chr6	5576973	5577737	G4_Up
chr6	6070244	6070644	G4_Up
chr6	7690569	7690969	G4_Up
chr6	8741704	8742104	G4_Up
chr6	10969850	10970250	G4_Up
chr6	13818316	13818716	G4_Up
chr6	17692606	17693006	G4_Up
chr6	17696845	17697245	G4_Up
chr6	18170387	18170787	G4_Up
chr6	18308466	18308866	G4_Up
chr6	21087444	21087844	G4_Up
chr6	22287919	22288319	G4_Up
chr6	22442579	22442979	G4_Up
chr6	23886435	23886835	G4_Up
chr6	24055028	24055428	G4_Up
chr6	24622109	24622509	G4_Up
chr6	24657633	24658033	G4_Up
chr6	26301711	26302111	G4_Up
chr6	28550569	28550969	G4_Up
chr6	28850771	28851171	G4_Up
chr6	28949150	28949550	G4_Up
chr6	29128434	29128834	G4_Up
chr6	29232439	29232839	G4_Up
chr6	29336693	29337093	G4_Up
chr6	29504161	29504561	G4_Up
chr6	29524154	29524554	G4_Up
chr6	29546408	29546808	G4_Up
chr6	29994994	29995394	G4_Up
chr6	30029083	30029483	G4_Up
chr6	30158044	30158444	G4_Up
chr6	30178268	30178668	G4_Up
chr6	30298134	30298534	G4_Up
chr6	30355505	30355905	G4_Up
chr6	31567244	31567644	G4_Up
chr6	31596582	31596982	G4_Up
chr6	31618731	31619131	G4_Up
chr6	31639370	31639770	G4_Up
chr6	31642503	31642903	G4_Up
chr6	32796842	32797242	G4_Up
chr6	33562527	33562927	G4_Up
chr6	33870625	33871025	G4_Up
chr6	34187349	34187749	G4_Up
chr6	34709312	34709712	G4_Up
chr6	34866823	34867223	G4_Up
chr6	35976535	35976935	G4_Up
chr6	36788109	36788509	G4_Up
chr6	37400944	37401344	G4_Up
chr6	37424425	37424825	G4_Up
chr6	37442113	37442513	G4_Up
chr6	37688627	37689279	G4_Up
chr6	37936580	37936980	G4_Up
chr6	38207570	38207970	G4_Up
chr6	38626121	38626521	G4_Up
chr6	39117332	39117732	G4_Up
chr6	39198800	39199200	G4_Up
chr6	39278453	39278853	G4_Up
chr6	39314584	39314984	G4_Up
chr6	39373811	39374576	G4_Up
chr6	39440209	39440609	G4_Up
chr6	39811678	39812078	G4_Up
chr6	42351836	42352236	G4_Up
chr6	43349046	43349446	G4_Up
chr6	48085377	48085777	G4_Up
chr6	48535057	48535457	G4_Up
chr6	49141027	49141427	G4_Up
chr6	49209038	49209438	G4_Up
chr6	49471347	49471747	G4_Up
chr6	49822441	49822841	G4_Up
chr6	50565357	50565757	G4_Up
chr6	51060151	51060551	G4_Up
chr6	51416845	51417245	G4_Up
chr6	51553877	51554277	G4_Up
chr6	51732152	51732552	G4_Up
chr6	52084520	52084920	G4_Up
chr6	52202988	52203388	G4_Up
chr6	52220007	52220407	G4_Up
chr6	52554044	52554444	G4_Up
chr6	52652207	52652607	G4_Up
chr6	52713529	52713929	G4_Up
chr6	53197255	53197655	G4_Up
chr6	53200706	53201106	G4_Up
chr6	53201203	53201603	G4_Up
chr6	54096135	54096535	G4_Up
chr6	55285590	55285990	G4_Up
chr6	55288805	55289205	G4_Up
chr6	55379138	55379538	G4_Up
chr6	55444401	55444801	G4_Up
chr6	55520832	55521232	G4_Up
chr6	55791905	55792305	G4_Up
chr6	56901785	56902185	G4_Up
chr6	59168992	59169392	G4_Up
chr6	60662525	60662925	G4_Up
chr6	61074671	61075071	G4_Up
chr6	65021874	65022274	G4_Up
chr6	65796654	65797054	G4_Up
chr6	66529271	66529671	G4_Up
chr6	66903699	66904099	G4_Up
chr6	67111580	67111980	G4_Up
chr6	67127659	67128059	G4_Up
chr6	67157106	67157506	G4_Up
chr6	67160447	67160847	G4_Up
chr6	70838500	70838900	G4_Up
chr6	70847147	70847547	G4_Up
chr6	71269478	71269878	G4_Up
chr6	71293555	71293955	G4_Up
chr6	71839899	71840299	G4_Up
chr6	72348431	72348831	G4_Up
chr6	72699692	72700092	G4_Up
chr6	72753724	72754124	G4_Up
chr6	72843477	72844107	G4_Up
chr6	72869609	72870009	G4_Up
chr6	81819644	81820044	G4_Up
chr6	82020920	82021320	G4_Up
chr6	83179456	83179856	G4_Up
chr6	83190007	83190407	G4_Up
chr6	83356652	83357052	G4_Up
chr6	83609403	83609803	G4_Up
chr6	83689577	83689977	G4_Up
chr6	83748455	83748855	G4_Up
chr6	83774575	83774975	G4_Up
chr6	83797595	83797995	G4_Up
chr6	83914136	83914536	G4_Up
chr6	84070544	84070944	G4_Up
chr6	84419165	84419565	G4_Up
chr6	85074931	85075331	G4_Up
chr6	85160193	85160593	G4_Up
chr6	85264244	85264644	G4_Up
chr6	85286750	85287150	G4_Up
chr6	85339297	85339697	G4_Up
chr6	85451248	85451648	G4_Up
chr6	86499504	86499904	G4_Up
chr6	86522489	86522889	G4_Up
chr6	86523953	86524353	G4_Up
chr6	86640182	86640582	G4_Up
chr6	86652875	86653275	G4_Up
chr6	86950917	86951317	G4_Up
chr6	87672071	87672471	G4_Up
chr6	87887622	87888022	G4_Up
chr6	87891675	87892075	G4_Up
chr6	88037680	88038080	G4_Up
chr6	88042523	88042923	G4_Up
chr6	88110121	88110521	G4_Up
chr6	88137939	88138339	G4_Up
chr6	88167907	88168307	G4_Up
chr6	88203360	88203760	G4_Up
chr6	88225808	88226208	G4_Up
chr6	88239971	88240371	G4_Up
chr6	88254409	88254809	G4_Up
chr6	88469813	88470213	G4_Up
chr6	88784918	88785318	G4_Up
chr6	88810150	88810550	G4_Up
chr6	89008835	89009235	G4_Up
chr6	89354091	89354491	G4_Up
chr6	89594815	89595215	G4_Up
chr6	90435109	90435509	G4_Up
chr6	90546608	90547008	G4_Up
chr6	90622718	90623118	G4_Up
chr6	90735195	90735595	G4_Up
chr6	91014253	91014653	G4_Up
chr6	91681836	91682236	G4_Up
chr6	91701279	91701679	G4_Up
chr6	91796023	91796423	G4_Up
chr6	91852542	91852942	G4_Up
chr6	92495519	92495919	G4_Up
chr6	93629865	93630265	G4_Up
chr6	93648556	93648956	G4_Up
chr6	93829628	93830028	G4_Up
chr6	93950206	93950606	G4_Up
chr6	94750492	94750892	G4_Up
chr6	94944049	94944449	G4_Up
chr6	94986339	94986739	G4_Up
chr6	97519651	97520051	G4_Up
chr6	99009742	99010142	G4_Up
chr6	99033092	99033492	G4_Up
chr6	99211625	99212025	G4_Up
chr6	99526888	99527288	G4_Up
chr6	99742795	99743195	G4_Up
chr6	99892374	99892774	G4_Up
chr6	99914399	99914799	G4_Up
chr6	99974397	99974797	G4_Up
chr6	100124317	100124717	G4_Up
chr6	100219716	100220116	G4_Up
chr6	100390088	100390750	G4_Up
chr6	100435836	100436236	G4_Up
chr6	100498854	100499254	G4_Up
chr6	100538653	100539053	G4_Up
chr6	100659354	100659754	G4_Up
chr6	100778579	100778979	G4_Up
chr6	102833155	102833555	G4_Up
chr6	103221101	103221501	G4_Up
chr6	103296028	103296428	G4_Up
chr6	105875981	105876381	G4_Up
chr6	107058979	107059379	G4_Up
chr6	108110357	108110757	G4_Up
chr6	108448671	108449071	G4_Up
chr6	108507895	108508295	G4_Up
chr6	108670570	108670970	G4_Up
chr6	108705906	108706306	G4_Up
chr6	108848746	108849146	G4_Up
chr6	112388419	112388819	G4_Up
chr6	112949151	112949551	G4_Up
chr6	113169843	113170243	G4_Up
chr6	113309992	113310392	G4_Up
chr6	113335821	113336221	G4_Up
chr6	113391052	113391452	G4_Up
chr6	113441166	113441566	G4_Up
chr6	113896021	113896421	G4_Up
chr6	114440587	114440987	G4_Up
chr6	114861000	114861400	G4_Up
chr6	114931882	114932282	G4_Up
chr6	115681225	115681910	G4_Up
chr6	115718188	115718588	G4_Up
chr6	115919547	115919947	G4_Up
chr6	117678271	117678671	G4_Up
chr6	117862448	117862848	G4_Up
chr6	120665568	120665968	G4_Up
chr6	120855549	120855949	G4_Up
chr6	120987367	120987767	G4_Up
chr6	121144983	121145383	G4_Up
chr6	121336584	121336984	G4_Up
chr6	121373613	121374013	G4_Up
chr6	121456480	121456880	G4_Up
chr6	121463752	121464152	G4_Up
chr6	122397747	122398147	G4_Up
chr6	122689189	122689589	G4_Up
chr6	122690579	122690979	G4_Up
chr6	122732154	122732554	G4_Up
chr6	124056983	124057383	G4_Up
chr6	124786083	124786483	G4_Up
chr6	124819846	124820246	G4_Up
chr6	124862424	124862824	G4_Up
chr6	125133147	125133547	G4_Up
chr6	125413978	125414378	G4_Up
chr6	125447233	125447633	G4_Up
chr6	125463727	125464127	G4_Up
chr6	125484823	125485223	G4_Up
chr6	125486608	125487008	G4_Up
chr6	125529288	125529688	G4_Up
chr6	125962996	125963396	G4_Up
chr6	126849030	126849430	G4_Up
chr6	127363238	127363638	G4_Up
chr6	127997992	127998392	G4_Up
chr6	128118966	128119366	G4_Up
chr6	128140675	128141075	G4_Up
chr6	128661050	128661450	G4_Up
chr6	128994320	128994720	G4_Up
chr6	134044503	134044903	G4_Up
chr6	134163018	134163418	G4_Up
chr6	134222407	134222807	G4_Up
chr6	134265952	134266352	G4_Up
chr6	134578037	134578437	G4_Up
chr6	134804993	134805393	G4_Up
chr6	135006134	135006534	G4_Up
chr6	136086733	136087133	G4_Up
chr6	136130450	136130850	G4_Up
chr6	137513432	137513832	G4_Up
chr6	137764381	137764781	G4_Up
chr6	140087985	140088385	G4_Up
chr6	140304087	140304487	G4_Up
chr6	140426889	140427289	G4_Up
chr6	140603386	140603786	G4_Up
chr6	140642699	140643099	G4_Up
chr6	140656792	140657192	G4_Up
chr6	140897147	140897547	G4_Up
chr6	141458953	141459353	G4_Up
chr6	141459641	141460041	G4_Up
chr6	141684462	141684862	G4_Up
chr6	142962378	142962778	G4_Up
chr6	143008865	143009265	G4_Up
chr6	143162153	143162553	G4_Up
chr6	144250807	144251207	G4_Up
chr6	144454323	144454723	G4_Up
chr6	145061382	145061782	G4_Up
chr6	145066182	145066582	G4_Up
chr6	145251701	145252101	G4_Up
chr6	146608859	146609259	G4_Up
chr6	146832317	146832717	G4_Up
chr6	146843337	146843737	G4_Up
chr6	147083423	147083823	G4_Up
chr6	148294489	148294889	G4_Up
chr6	148935009	148935409	G4_Up
chr7	3184387	3184787	G4_Up
chr7	3351300	3351700	G4_Up
chr7	3390047	3390447	G4_Up
chr7	4620008	4620408	G4_Up
chr7	4820912	4821312	G4_Up
chr7	4902336	4902736	G4_Up
chr7	4942591	4942991	G4_Up
chr7	5004089	5004489	G4_Up
chr7	6385614	6386014	G4_Up
chr7	6825765	6826165	G4_Up
chr7	12787241	12787641	G4_Up
chr7	12929943	12930343	G4_Up
chr7	13012732	13013132	G4_Up
chr7	13306574	13306974	G4_Up
chr7	13398185	13398585	G4_Up
chr7	16004465	16004865	G4_Up
chr7	16195194	16195594	G4_Up
chr7	16913592	16913992	G4_Up
chr7	17061107	17061507	G4_Up
chr7	18900823	18901223	G4_Up
chr7	18948164	18948564	G4_Up
chr7	19073443	19073843	G4_Up
chr7	19184695	19185095	G4_Up
chr7	19354967	19355367	G4_Up
chr7	19459545	19459945	G4_Up
chr7	19712439	19712839	G4_Up
chr7	19853504	19853904	G4_Up
chr7	24499310	24499710	G4_Up
chr7	24947239	24947639	G4_Up
chr7	25269690	25270090	G4_Up
chr7	25349071	25349471	G4_Up
chr7	25647619	25648019	G4_Up
chr7	27491819	27492219	G4_Up
chr7	27644449	27644849	G4_Up
chr7	27726672	27727072	G4_Up
chr7	28694941	28695341	G4_Up
chr7	29894852	29895252	G4_Up
chr7	29941012	29941412	G4_Up
chr7	29991414	29991814	G4_Up
chr7	30038838	30039238	G4_Up
chr7	30425291	30425691	G4_Up
chr7	30534035	30534435	G4_Up
chr7	30626004	30626404	G4_Up
chr7	34226725	34227125	G4_Up
chr7	35765419	35765819	G4_Up
chr7	38030134	38030892	G4_Up
chr7	38271149	38271549	G4_Up
chr7	40898122	40898522	G4_Up
chr7	43167540	43167940	G4_Up
chr7	43462871	43463271	G4_Up
chr7	43490101	43490501	G4_Up
chr7	44291357	44291757	G4_Up
chr7	44405641	44406041	G4_Up
chr7	45350030	45350430	G4_Up
chr7	45364593	45364993	G4_Up
chr7	45519341	45519741	G4_Up
chr7	46449057	46449457	G4_Up
chr7	48321770	48322170	G4_Up
chr7	48721306	48721706	G4_Up
chr7	48960092	48960492	G4_Up
chr7	48995139	48995539	G4_Up
chr7	49272435	49272835	G4_Up
chr7	49522509	49522909	G4_Up
chr7	49622241	49622641	G4_Up
chr7	60934685	60935085	G4_Up
chr7	63084362	63084762	G4_Up
chr7	63206773	63207173	G4_Up
chr7	63697114	63697514	G4_Up
chr7	63767150	63767550	G4_Up
chr7	63958307	63958707	G4_Up
chr7	64720849	64721249	G4_Up
chr7	65430422	65430822	G4_Up
chr7	65981032	65981432	G4_Up
chr7	67385126	67385526	G4_Up
chr7	67482632	67483032	G4_Up
chr7	68219116	68219516	G4_Up
chr7	68357879	68358279	G4_Up
chr7	68637927	68638327	G4_Up
chr7	68823216	68823616	G4_Up
chr7	70016636	70017036	G4_Up
chr7	70624737	70625137	G4_Up
chr7	70788954	70789354	G4_Up
chr7	73145432	73145832	G4_Up
chr7	73572794	73573194	G4_Up
chr7	75998550	75998950	G4_Up
chr7	77079389	77079789	G4_Up
chr7	79120300	79120700	G4_Up
chr7	79213970	79214370	G4_Up
chr7	79615002	79615402	G4_Up
chr7	79654215	79654615	G4_Up
chr7	79770774	79771174	G4_Up
chr7	80015158	80015558	G4_Up
chr7	80071819	80072219	G4_Up
chr7	80201066	80201466	G4_Up
chr7	80204329	80204729	G4_Up
chr7	80207339	80207739	G4_Up
chr7	80499150	80499550	G4_Up
chr7	80823191	80823591	G4_Up
chr7	81333269	81333669	G4_Up
chr7	81480804	81481204	G4_Up
chr7	82402427	82402827	G4_Up
chr7	83540989	83541389	G4_Up
chr7	83810320	83810720	G4_Up
chr7	84806237	84806637	G4_Up
chr7	90303116	90303516	G4_Up
chr7	95480232	95480632	G4_Up
chr7	96981572	96981972	G4_Up
chr7	97480720	97481120	G4_Up
chr7	97536572	97536972	G4_Up
chr7	97830714	97831114	G4_Up
chr7	97977466	97977866	G4_Up
chr7	98491282	98491682	G4_Up
chr7	98670827	98671227	G4_Up
chr7	98811874	98812274	G4_Up
chr7	98885521	98885921	G4_Up
chr7	98922647	98923047	G4_Up
chr7	99329006	99329406	G4_Up
chr7	99813549	99813949	G4_Up
chr7	100582729	100583129	G4_Up
chr7	100816755	100817155	G4_Up
chr7	101999286	101999686	G4_Up
chr7	104114012	104114412	G4_Up
chr7	107238471	107238871	G4_Up
chr7	107391653	107392053	G4_Up
chr7	108716966	108717366	G4_Up
chr7	108972437	108972837	G4_Up
chr7	109012161	109012561	G4_Up
chr7	109630018	109630418	G4_Up
chr7	110058332	110058732	G4_Up
chr7	110116766	110117166	G4_Up
chr7	112711982	112712382	G4_Up
chr7	113039250	113039650	G4_Up
chr7	113186337	113186737	G4_Up
chr7	113297103	113297503	G4_Up
chr7	114053418	114053818	G4_Up
[truncated: 17,736 more rows]

## Sheet: Supplementary Table 2g
G-loop-associated differential genes	G4-associated differential genes	R-loop-associated differential genes
ENSMUSG00000021095	ENSMUSG00000042699	ENSMUSG00000000544
ENSMUSG00000021835	ENSMUSG00000029304	ENSMUSG00000000708
ENSMUSG00000040859	ENSMUSG00000028645	ENSMUSG00000000753
ENSMUSG00000026380	ENSMUSG00000017466	ENSMUSG00000000805
ENSMUSG00000048402	ENSMUSG00000034101	ENSMUSG00000000861
ENSMUSG00000037035	ENSMUSG00000031700	ENSMUSG00000000938
ENSMUSG00000016526	ENSMUSG00000033295	ENSMUSG00000001119
ENSMUSG00000042349	ENSMUSG00000027326	ENSMUSG00000001120
ENSMUSG00000042268	ENSMUSG00000038729	ENSMUSG00000001418
ENSMUSG00000042115	ENSMUSG00000018593	ENSMUSG00000001751
ENSMUSG00000026443	ENSMUSG00000001985	ENSMUSG00000001930
ENSMUSG00000033722	ENSMUSG00000037035	ENSMUSG00000001943
ENSMUSG00000045515	ENSMUSG00000027082	ENSMUSG00000001985
ENSMUSG00000005501	ENSMUSG00000028581	ENSMUSG00000002602
ENSMUSG00000007805	ENSMUSG00000021835	ENSMUSG00000002731
ENSMUSG00000074657	ENSMUSG00000012396	ENSMUSG00000002980
ENSMUSG00000040249	ENSMUSG00000061887	ENSMUSG00000003033
ENSMUSG00000035852	ENSMUSG00000031523	ENSMUSG00000003279
ENSMUSG00000047712	ENSMUSG00000017548	ENSMUSG00000003411
ENSMUSG00000044937	ENSMUSG00000032291	ENSMUSG00000003469
ENSMUSG00000039450	ENSMUSG00000029701	ENSMUSG00000003534
ENSMUSG00000046417	ENSMUSG00000048402	ENSMUSG00000003746
ENSMUSG00000020882	ENSMUSG00000061186	ENSMUSG00000004035
ENSMUSG00000021278	ENSMUSG00000026463	ENSMUSG00000004105
ENSMUSG00000037336	ENSMUSG00000026398	ENSMUSG00000004113
ENSMUSG00000021604	ENSMUSG00000034168	ENSMUSG00000004359
ENSMUSG00000033730	ENSMUSG00000028798	ENSMUSG00000004748
ENSMUSG00000022018	ENSMUSG00000005672	ENSMUSG00000005087
ENSMUSG00000018126	ENSMUSG00000044393	ENSMUSG00000005237
ENSMUSG00000052316	ENSMUSG00000028530	ENSMUSG00000005501
ENSMUSG00000024039	ENSMUSG00000029763	ENSMUSG00000005672
ENSMUSG00000000708	ENSMUSG00000025856	ENSMUSG00000005892
ENSMUSG00000024164	ENSMUSG00000026042	ENSMUSG00000006014
ENSMUSG00000024140	ENSMUSG00000004535	ENSMUSG00000006386
ENSMUSG00000036918	ENSMUSG00000033365	ENSMUSG00000006395
ENSMUSG00000024526	ENSMUSG00000029761	ENSMUSG00000006435
ENSMUSG00000034006	ENSMUSG00000032870	ENSMUSG00000006527
ENSMUSG00000024738	ENSMUSG00000034610	ENSMUSG00000007805
ENSMUSG00000047604	ENSMUSG00000027660	ENSMUSG00000008136
ENSMUSG00000006435	ENSMUSG00000033306	ENSMUSG00000008575
ENSMUSG00000025064	ENSMUSG00000047281	ENSMUSG00000009614
ENSMUSG00000027463	ENSMUSG00000031865	ENSMUSG00000009640
ENSMUSG00000074647	ENSMUSG00000054753	ENSMUSG00000009739
ENSMUSG00000050556	ENSMUSG00000069806	ENSMUSG00000010175
ENSMUSG00000046470	ENSMUSG00000028677	ENSMUSG00000011263
ENSMUSG00000078202	ENSMUSG00000021678	ENSMUSG00000012017
ENSMUSG00000048038	ENSMUSG00000036928	ENSMUSG00000012282
ENSMUSG00000044647	ENSMUSG00000028601	ENSMUSG00000013236
ENSMUSG00000038354	ENSMUSG00000029313	ENSMUSG00000013275
ENSMUSG00000028517	ENSMUSG00000020097	ENSMUSG00000014075
ENSMUSG00000044254	ENSMUSG00000026626	ENSMUSG00000014198
ENSMUSG00000061887	ENSMUSG00000026883	ENSMUSG00000014602
ENSMUSG00000028610	ENSMUSG00000029776	ENSMUSG00000015053
ENSMUSG00000028677	ENSMUSG00000026288	ENSMUSG00000015202
ENSMUSG00000006395	ENSMUSG00000026586	ENSMUSG00000015599
ENSMUSG00000032998	ENSMUSG00000033998	ENSMUSG00000015843
ENSMUSG00000028657	ENSMUSG00000022438	ENSMUSG00000015846
ENSMUSG00000046093	ENSMUSG00000026483	ENSMUSG00000015947
ENSMUSG00000028894	ENSMUSG00000003534	ENSMUSG00000015981
ENSMUSG00000042677	ENSMUSG00000039633	ENSMUSG00000016018
ENSMUSG00000001985	ENSMUSG00000022892	ENSMUSG00000016179
ENSMUSG00000073758	ENSMUSG00000037111	ENSMUSG00000016526
ENSMUSG00000029055	ENSMUSG00000048612	ENSMUSG00000016624
ENSMUSG00000023153	ENSMUSG00000028622	ENSMUSG00000016758
ENSMUSG00000029061	ENSMUSG00000026873	ENSMUSG00000017417
ENSMUSG00000039158	ENSMUSG00000028646	ENSMUSG00000017446
ENSMUSG00000040254	ENSMUSG00000041444	ENSMUSG00000017493
ENSMUSG00000037428	ENSMUSG00000031119	ENSMUSG00000017639
ENSMUSG00000029570	ENSMUSG00000036390	ENSMUSG00000017817
ENSMUSG00000029151	ENSMUSG00000040690	ENSMUSG00000018008
ENSMUSG00000034648	ENSMUSG00000048087	ENSMUSG00000018126
ENSMUSG00000030339	ENSMUSG00000022900	ENSMUSG00000018474
ENSMUSG00000030351	ENSMUSG00000050737	ENSMUSG00000018924
ENSMUSG00000000938	ENSMUSG00000062115	ENSMUSG00000019124
ENSMUSG00000091625	ENSMUSG00000041359	ENSMUSG00000019779
ENSMUSG00000037621	ENSMUSG00000068923	ENSMUSG00000019838
ENSMUSG00000063415	ENSMUSG00000027985	ENSMUSG00000019899
ENSMUSG00000035199	ENSMUSG00000026674	ENSMUSG00000020067
ENSMUSG00000043017	ENSMUSG00000041112	ENSMUSG00000020108
ENSMUSG00000002980	ENSMUSG00000036030	ENSMUSG00000020176
ENSMUSG00000037469	ENSMUSG00000053414	ENSMUSG00000020181
ENSMUSG00000030525	ENSMUSG00000056427	ENSMUSG00000020228
ENSMUSG00000031891	ENSMUSG00000055322	ENSMUSG00000020354
ENSMUSG00000039509	ENSMUSG00000068115	ENSMUSG00000020423
ENSMUSG00000031849	ENSMUSG00000040859	ENSMUSG00000020455
ENSMUSG00000003033	ENSMUSG00000033684	ENSMUSG00000020467
ENSMUSG00000034684	ENSMUSG00000026198	ENSMUSG00000020614
ENSMUSG00000025804	ENSMUSG00000032826	ENSMUSG00000020657
ENSMUSG00000079592	ENSMUSG00000024140	ENSMUSG00000020792
ENSMUSG00000031434	ENSMUSG00000025041	ENSMUSG00000020882
ENSMUSG00000026389	ENSMUSG00000000708	ENSMUSG00000020901
ENSMUSG00000042414	ENSMUSG00000079471	ENSMUSG00000021055
ENSMUSG00000053024	ENSMUSG00000028559	ENSMUSG00000021095
ENSMUSG00000070645	ENSMUSG00000036402	ENSMUSG00000021186
ENSMUSG00000041801	ENSMUSG00000041801	ENSMUSG00000021187
ENSMUSG00000097113	ENSMUSG00000026764	ENSMUSG00000021278
ENSMUSG00000026594	ENSMUSG00000042195	ENSMUSG00000021313
ENSMUSG00000026575	ENSMUSG00000049382	ENSMUSG00000021567
ENSMUSG00000059498	ENSMUSG00000026575	ENSMUSG00000021583
ENSMUSG00000026500	ENSMUSG00000026278	ENSMUSG00000021604
ENSMUSG00000026494	ENSMUSG00000028847	ENSMUSG00000021636
ENSMUSG00000025978	ENSMUSG00000028538	ENSMUSG00000021678
ENSMUSG00000073633	ENSMUSG00000028121	ENSMUSG00000021798
ENSMUSG00000026288	ENSMUSG00000026604	ENSMUSG00000021835
ENSMUSG00000020053	ENSMUSG00000071454	ENSMUSG00000021838
ENSMUSG00000019302	ENSMUSG00000020528	ENSMUSG00000021895
ENSMUSG00000020160	ENSMUSG00000026594	ENSMUSG00000021947
ENSMUSG00000064057	ENSMUSG00000026442	ENSMUSG00000021950
ENSMUSG00000085628	ENSMUSG00000100826	ENSMUSG00000021990
ENSMUSG00000021185	ENSMUSG00000028943	ENSMUSG00000021994
ENSMUSG00000041359	ENSMUSG00000013275	ENSMUSG00000022018
ENSMUSG00000071454	ENSMUSG00000008398	ENSMUSG00000022037
ENSMUSG00000021055	ENSMUSG00000028796	ENSMUSG00000022095
ENSMUSG00000021313	ENSMUSG00000028517	ENSMUSG00000022139
ENSMUSG00000006179	ENSMUSG00000024594	ENSMUSG00000022270
ENSMUSG00000022139	ENSMUSG00000030352	ENSMUSG00000022286
ENSMUSG00000025370	ENSMUSG00000081044	ENSMUSG00000022425
ENSMUSG00000022236	ENSMUSG00000062444	ENSMUSG00000022505
ENSMUSG00000022146	ENSMUSG00000054256	ENSMUSG00000022519
ENSMUSG00000022438	ENSMUSG00000030083	ENSMUSG00000022623
ENSMUSG00000065979	ENSMUSG00000055044	ENSMUSG00000022641
ENSMUSG00000022900	ENSMUSG00000023903	ENSMUSG00000022847
ENSMUSG00000053414	ENSMUSG00000028657	ENSMUSG00000023039
ENSMUSG00000023913	ENSMUSG00000057440	ENSMUSG00000023153
ENSMUSG00000044393	ENSMUSG00000020423	ENSMUSG00000023942
ENSMUSG00000012282	ENSMUSG00000021994	ENSMUSG00000023987
ENSMUSG00000102543	ENSMUSG00000026389	ENSMUSG00000024039
ENSMUSG00000033016	ENSMUSG00000035105	ENSMUSG00000024054
ENSMUSG00000048612	ENSMUSG00000036622	ENSMUSG00000024059
ENSMUSG00000025041	ENSMUSG00000035021	ENSMUSG00000024074
ENSMUSG00000047658	ENSMUSG00000019302	ENSMUSG00000024087
ENSMUSG00000027168	ENSMUSG00000042414	ENSMUSG00000024140
ENSMUSG00000027326	ENSMUSG00000036882	ENSMUSG00000024164
ENSMUSG00000085631	ENSMUSG00000038368	ENSMUSG00000024172
ENSMUSG00000050737	ENSMUSG00000031028	ENSMUSG00000024228
ENSMUSG00000000247	ENSMUSG00000040972	ENSMUSG00000024261
ENSMUSG00000045319	ENSMUSG00000014602	ENSMUSG00000024424
ENSMUSG00000027082	ENSMUSG00000031979	ENSMUSG00000024431
ENSMUSG00000027985	ENSMUSG00000063455	ENSMUSG00000024526
ENSMUSG00000037111	ENSMUSG00000020086	ENSMUSG00000024558
ENSMUSG00000046317	ENSMUSG00000061979	ENSMUSG00000024578
ENSMUSG00000043572	ENSMUSG00000030551	ENSMUSG00000024621
ENSMUSG00000003411	ENSMUSG00000046402	ENSMUSG00000024731
ENSMUSG00000078588	ENSMUSG00000033735	ENSMUSG00000024738
ENSMUSG00000028631	ENSMUSG00000042677	ENSMUSG00000024922
ENSMUSG00000028646	ENSMUSG00000039254	ENSMUSG00000024940
ENSMUSG00000028863	ENSMUSG00000015846	ENSMUSG00000024965
ENSMUSG00000028847	ENSMUSG00000073018	ENSMUSG00000024985
ENSMUSG00000028796	ENSMUSG00000006435	ENSMUSG00000025064
ENSMUSG00000041000	ENSMUSG00000027347	ENSMUSG00000025171
ENSMUSG00000047281	ENSMUSG00000021281	ENSMUSG00000025194
ENSMUSG00000040972	ENSMUSG00000022139	ENSMUSG00000025255
ENSMUSG00000066113	ENSMUSG00000009640	ENSMUSG00000025395
ENSMUSG00000028573	ENSMUSG00000031608	ENSMUSG00000025405
ENSMUSG00000028565	ENSMUSG00000032586	ENSMUSG00000025413
ENSMUSG00000029313	ENSMUSG00000036086	ENSMUSG00000025612
ENSMUSG00000042002	ENSMUSG00000008489	ENSMUSG00000025789
ENSMUSG00000025856	ENSMUSG00000001039	ENSMUSG00000025804
ENSMUSG00000005107	ENSMUSG00000028557	ENSMUSG00000025902
ENSMUSG00000037736	ENSMUSG00000025612	ENSMUSG00000025927
ENSMUSG00000030302	ENSMUSG00000052713	ENSMUSG00000025937
ENSMUSG00000029761	ENSMUSG00000051154	ENSMUSG00000026031
ENSMUSG00000063455	ENSMUSG00000004113	ENSMUSG00000026073
ENSMUSG00000004535	ENSMUSG00000028073	ENSMUSG00000026185
ENSMUSG00000036390	ENSMUSG00000038151	ENSMUSG00000026211
ENSMUSG00000073018	ENSMUSG00000030956	ENSMUSG00000026249
ENSMUSG00000030051	ENSMUSG00000037370	ENSMUSG00000026288
ENSMUSG00000055403	ENSMUSG00000005124	ENSMUSG00000026380
ENSMUSG00000030956	ENSMUSG00000024743	ENSMUSG00000026389
ENSMUSG00000054555	ENSMUSG00000035873	ENSMUSG00000026395
ENSMUSG00000030411	ENSMUSG00000037138	ENSMUSG00000026398
ENSMUSG00000023467	ENSMUSG00000065979	ENSMUSG00000026442
ENSMUSG00000062444	ENSMUSG00000028863	ENSMUSG00000026443
ENSMUSG00000046589	ENSMUSG00000025608	ENSMUSG00000026450
ENSMUSG00000040813	ENSMUSG00000035069	ENSMUSG00000026458
ENSMUSG00000031965	ENSMUSG00000005125	ENSMUSG00000026473
ENSMUSG00000042195	ENSMUSG00000046694	ENSMUSG00000026482
ENSMUSG00000032911	ENSMUSG00000035275	ENSMUSG00000026494
ENSMUSG00000037681	ENSMUSG00000029664	ENSMUSG00000026572
ENSMUSG00000031373	ENSMUSG00000026443	ENSMUSG00000026575
ENSMUSG00000081044	ENSMUSG00000028982	ENSMUSG00000026604
ENSMUSG00000037375	ENSMUSG00000026824	ENSMUSG00000026632
ENSMUSG00000035557	ENSMUSG00000030411	ENSMUSG00000026649
ENSMUSG00000020695	ENSMUSG00000032911	ENSMUSG00000026674
ENSMUSG00000000567	ENSMUSG00000029838	ENSMUSG00000026687
ENSMUSG00000020811	ENSMUSG00000020427	ENSMUSG00000026725
ENSMUSG00000021803	ENSMUSG00000067786	ENSMUSG00000026748
ENSMUSG00000022464	ENSMUSG00000078202	ENSMUSG00000026765
ENSMUSG00000022508	ENSMUSG00000030830	ENSMUSG00000026773
ENSMUSG00000041831	ENSMUSG00000022018	ENSMUSG00000026837
ENSMUSG00000027457	ENSMUSG00000045160	ENSMUSG00000026856
ENSMUSG00000040969	ENSMUSG00000040813	ENSMUSG00000026879
ENSMUSG00000028173	ENSMUSG00000068740	ENSMUSG00000026883
ENSMUSG00000005045	ENSMUSG00000030351	ENSMUSG00000026979
ENSMUSG00000015224	ENSMUSG00000062729	ENSMUSG00000027030
ENSMUSG00000029522	ENSMUSG00000025521	ENSMUSG00000027068
ENSMUSG00000030083	ENSMUSG00000055435	ENSMUSG00000027070
ENSMUSG00000030772	ENSMUSG00000023913	ENSMUSG00000027204
ENSMUSG00000043456	ENSMUSG00000020908	ENSMUSG00000027215
ENSMUSG00000030739	ENSMUSG00000035000	ENSMUSG00000027221
ENSMUSG00000056972	ENSMUSG00000028519	ENSMUSG00000027326
ENSMUSG00000031673	ENSMUSG00000022146	ENSMUSG00000027347
ENSMUSG00000014782	ENSMUSG00000028550	ENSMUSG00000027351
ENSMUSG00000041949	ENSMUSG00000020455	ENSMUSG00000027358
ENSMUSG00000097393	ENSMUSG00000028031	ENSMUSG00000027368
ENSMUSG00000063049	ENSMUSG00000028496	ENSMUSG00000027430
ENSMUSG00000094443	ENSMUSG00000028023	ENSMUSG00000027435
ENSMUSG00000034518	ENSMUSG00000085412	ENSMUSG00000027463
ENSMUSG00000031789	ENSMUSG00000050069	ENSMUSG00000027478
ENSMUSG00000056220	ENSMUSG00000084883	ENSMUSG00000027499
ENSMUSG00000026715	ENSMUSG00000037161	ENSMUSG00000027660
ENSMUSG00000039377	ENSMUSG00000022550	ENSMUSG00000027692
ENSMUSG00000026211	ENSMUSG00000061132	ENSMUSG00000027947
ENSMUSG00000035873	ENSMUSG00000034744	ENSMUSG00000028019
ENSMUSG00000020183	ENSMUSG00000053559	ENSMUSG00000028023
ENSMUSG00000090191	ENSMUSG00000031373	ENSMUSG00000028064
ENSMUSG00000040258	ENSMUSG00000021209	ENSMUSG00000028073
ENSMUSG00000025395	ENSMUSG00000049109	ENSMUSG00000028121
ENSMUSG00000040653	ENSMUSG00000066113	ENSMUSG00000028179
ENSMUSG00000038602	ENSMUSG00000028795	ENSMUSG00000028337
ENSMUSG00000047669	ENSMUSG00000043336	ENSMUSG00000028339
ENSMUSG00000020086	ENSMUSG00000033060	ENSMUSG00000028517
ENSMUSG00000001119	ENSMUSG00000027463	ENSMUSG00000028519
ENSMUSG00000020331	ENSMUSG00000054555	ENSMUSG00000028530
ENSMUSG00000051067	ENSMUSG00000012282	ENSMUSG00000028538
ENSMUSG00000015312	ENSMUSG00000029428	ENSMUSG00000028550
ENSMUSG00000035041	ENSMUSG00000061894	ENSMUSG00000028551
ENSMUSG00000096856	ENSMUSG00000056602	ENSMUSG00000028555
ENSMUSG00000020037	ENSMUSG00000036523	ENSMUSG00000028556
ENSMUSG00000008398	ENSMUSG00000015189	ENSMUSG00000028557
ENSMUSG00000019326	ENSMUSG00000028565	ENSMUSG00000028559
ENSMUSG00000034936	ENSMUSG00000024985	ENSMUSG00000028567
ENSMUSG00000034768	ENSMUSG00000034858	ENSMUSG00000028600
ENSMUSG00000045532	ENSMUSG00000056220	ENSMUSG00000028601
ENSMUSG00000034255	ENSMUSG00000018217	ENSMUSG00000028609
ENSMUSG00000020689	ENSMUSG00000007989	ENSMUSG00000028610
ENSMUSG00000087259	ENSMUSG00000020053	ENSMUSG00000028614
ENSMUSG00000018727	ENSMUSG00000015501	ENSMUSG00000028619
ENSMUSG00000041598	ENSMUSG00000028573	ENSMUSG00000028621
ENSMUSG00000039989	ENSMUSG00000040289	ENSMUSG00000028622
ENSMUSG00000004748	ENSMUSG00000021313	ENSMUSG00000028631
ENSMUSG00000044352	ENSMUSG00000059498	ENSMUSG00000028634
ENSMUSG00000087165	ENSMUSG00000039158	ENSMUSG00000028645
ENSMUSG00000037335	ENSMUSG00000026494	ENSMUSG00000028646
ENSMUSG00000041046	ENSMUSG00000003949	ENSMUSG00000028656
ENSMUSG00000020902	ENSMUSG00000021895	ENSMUSG00000028657
ENSMUSG00000089669	ENSMUSG00000006906	ENSMUSG00000028677
ENSMUSG00000005951	ENSMUSG00000038167	ENSMUSG00000028683
ENSMUSG00000017639	ENSMUSG00000044254	ENSMUSG00000028698
ENSMUSG00000018698	ENSMUSG00000037681	ENSMUSG00000028700
ENSMUSG00000034449	ENSMUSG00000033066	ENSMUSG00000028702
ENSMUSG00000034156	ENSMUSG00000026656	ENSMUSG00000028717
ENSMUSG00000001506	ENSMUSG00000026638	ENSMUSG00000028760
ENSMUSG00000038976	ENSMUSG00000008136	ENSMUSG00000028772
ENSMUSG00000047415	ENSMUSG00000001156	ENSMUSG00000028776
ENSMUSG00000099759	ENSMUSG00000058966	ENSMUSG00000028789
ENSMUSG00000020653	ENSMUSG00000030051	ENSMUSG00000028796
ENSMUSG00000035799	ENSMUSG00000025993	ENSMUSG00000028798
ENSMUSG00000020661	ENSMUSG00000034684	ENSMUSG00000028833
ENSMUSG00000021136	ENSMUSG00000038331	ENSMUSG00000028836
ENSMUSG00000021636	ENSMUSG00000078570	ENSMUSG00000028894
ENSMUSG00000021359	ENSMUSG00000073755	ENSMUSG00000028909
ENSMUSG00000050002	ENSMUSG00000001943	ENSMUSG00000028982
ENSMUSG00000043157	ENSMUSG00000053626	ENSMUSG00000029049
ENSMUSG00000023045	ENSMUSG00000053024	ENSMUSG00000029055
ENSMUSG00000001281	ENSMUSG00000043572	ENSMUSG00000029061
ENSMUSG00000022489	ENSMUSG00000015053	ENSMUSG00000029126
ENSMUSG00000005124	ENSMUSG00000024664	ENSMUSG00000029151
ENSMUSG00000047591	ENSMUSG00000056900	ENSMUSG00000029313
ENSMUSG00000071715	ENSMUSG00000037492	ENSMUSG00000029359
ENSMUSG00000022432	ENSMUSG00000050556	ENSMUSG00000029410
ENSMUSG00000022619	ENSMUSG00000063430	ENSMUSG00000029570
ENSMUSG00000022623	ENSMUSG00000007805	ENSMUSG00000029602
ENSMUSG00000043144	ENSMUSG00000028370	ENSMUSG00000029603
ENSMUSG00000023017	ENSMUSG00000026765	ENSMUSG00000029650
ENSMUSG00000022683	ENSMUSG00000102543	ENSMUSG00000029701
ENSMUSG00000022750	ENSMUSG00000039461	ENSMUSG00000029762
ENSMUSG00000071632	ENSMUSG00000020814	ENSMUSG00000029763
ENSMUSG00000052133	ENSMUSG00000031284	ENSMUSG00000029810
ENSMUSG00000022519	ENSMUSG00000037375	ENSMUSG00000029838
ENSMUSG00000050762	ENSMUSG00000042190	ENSMUSG00000029919
ENSMUSG00000019320	ENSMUSG00000047658	ENSMUSG00000029925
ENSMUSG00000048731	ENSMUSG00000018819	ENSMUSG00000029999
ENSMUSG00000062591	ENSMUSG00000027249	ENSMUSG00000030022
ENSMUSG00000024228	ENSMUSG00000026535	ENSMUSG00000030060
ENSMUSG00000052397	ENSMUSG00000038463	ENSMUSG00000030074
ENSMUSG00000003279	ENSMUSG00000039782	ENSMUSG00000030083
ENSMUSG00000024059	ENSMUSG00000001930	ENSMUSG00000030095
ENSMUSG00000024063	ENSMUSG00000043668	ENSMUSG00000030108
ENSMUSG00000024066	ENSMUSG00000002324	ENSMUSG00000030170
ENSMUSG00000103472	ENSMUSG00000020623	ENSMUSG00000030208
ENSMUSG00000102428	ENSMUSG00000028337	ENSMUSG00000030214
ENSMUSG00000049090	ENSMUSG00000025085	ENSMUSG00000030223
ENSMUSG00000035179	ENSMUSG00000025938	ENSMUSG00000030339
ENSMUSG00000048832	ENSMUSG00000073633	ENSMUSG00000030351
ENSMUSG00000038155	ENSMUSG00000042002	ENSMUSG00000030352
ENSMUSG00000024851	ENSMUSG00000022508	ENSMUSG00000030519
ENSMUSG00000005986	ENSMUSG00000045930	ENSMUSG00000030525
ENSMUSG00000059326	ENSMUSG00000040570	ENSMUSG00000030549
ENSMUSG00000032841	ENSMUSG00000032363	ENSMUSG00000030592
ENSMUSG00000061186	ENSMUSG00000030525	ENSMUSG00000030745
ENSMUSG00000057234	ENSMUSG00000010461	ENSMUSG00000030830
ENSMUSG00000074923	ENSMUSG00000021185	ENSMUSG00000030839
ENSMUSG00000060131	ENSMUSG00000044197	ENSMUSG00000030851
ENSMUSG00000079056	ENSMUSG00000042873	ENSMUSG00000031026
ENSMUSG00000027356	ENSMUSG00000042616	ENSMUSG00000031028
ENSMUSG00000057914	ENSMUSG00000047497	ENSMUSG00000031434
ENSMUSG00000037025	ENSMUSG00000026500	ENSMUSG00000031530
ENSMUSG00000059361	ENSMUSG00000021095	ENSMUSG00000031538
ENSMUSG00000042745	ENSMUSG00000046314	ENSMUSG00000031586
ENSMUSG00000062175	ENSMUSG00000003279	ENSMUSG00000031605
ENSMUSG00000044349	ENSMUSG00000002769	ENSMUSG00000031608
ENSMUSG00000037754	ENSMUSG00000035799	ENSMUSG00000031626
ENSMUSG00000074622	ENSMUSG00000070469	ENSMUSG00000031633
ENSMUSG00000038400	ENSMUSG00000066607	ENSMUSG00000031688
ENSMUSG00000027525	ENSMUSG00000055403	ENSMUSG00000031734
ENSMUSG00000027570	ENSMUSG00000038390	ENSMUSG00000031849
ENSMUSG00000015085	ENSMUSG00000030302	ENSMUSG00000031865
ENSMUSG00000079499	ENSMUSG00000054362	ENSMUSG00000031891
ENSMUSG00000047250	ENSMUSG00000024232	ENSMUSG00000031963
ENSMUSG00000026765	ENSMUSG00000040037	ENSMUSG00000031990
ENSMUSG00000049044	ENSMUSG00000022754	ENSMUSG00000032011
ENSMUSG00000027107	ENSMUSG00000085631	ENSMUSG00000032012
ENSMUSG00000027075	ENSMUSG00000022122	ENSMUSG00000032014
ENSMUSG00000040310	ENSMUSG00000030276	ENSMUSG00000032047
ENSMUSG00000075023	ENSMUSG00000074575	ENSMUSG00000032172
ENSMUSG00000068740	ENSMUSG00000059900	ENSMUSG00000032239
ENSMUSG00000053965	ENSMUSG00000033016	ENSMUSG00000032267
ENSMUSG00000028023	ENSMUSG00000001323	ENSMUSG00000032291
ENSMUSG00000027994	ENSMUSG00000027499	ENSMUSG00000032313
ENSMUSG00000037161	ENSMUSG00000070604	ENSMUSG00000032359
ENSMUSG00000036334	ENSMUSG00000010175	ENSMUSG00000032363
ENSMUSG00000046999	ENSMUSG00000025927	ENSMUSG00000032368
ENSMUSG00000027955	ENSMUSG00000025804	ENSMUSG00000032373
ENSMUSG00000027993	ENSMUSG00000001655	ENSMUSG00000032380
ENSMUSG00000028078	ENSMUSG00000042349	ENSMUSG00000032415
ENSMUSG00000096935	ENSMUSG00000011008	ENSMUSG00000032419
ENSMUSG00000028109	ENSMUSG00000034813	ENSMUSG00000032440
ENSMUSG00000049097	ENSMUSG00000052135	ENSMUSG00000032625
ENSMUSG00000094595	ENSMUSG00000096935	ENSMUSG00000032702
ENSMUSG00000050966	ENSMUSG00000043017	ENSMUSG00000032724
ENSMUSG00000028834	ENSMUSG00000000861	ENSMUSG00000032850
ENSMUSG00000006218	ENSMUSG00000090958	ENSMUSG00000032870
ENSMUSG00000028602	ENSMUSG00000007944	ENSMUSG00000032878
ENSMUSG00000028982	ENSMUSG00000037509	ENSMUSG00000032998
ENSMUSG00000039838	ENSMUSG00000046997	ENSMUSG00000033016
ENSMUSG00000028943	ENSMUSG00000037463	ENSMUSG00000033060
ENSMUSG00000029049	ENSMUSG00000035279	ENSMUSG00000033207
ENSMUSG00000028289	ENSMUSG00000021506	ENSMUSG00000033253
ENSMUSG00000028435	ENSMUSG00000045319	ENSMUSG00000033295
ENSMUSG00000028459	ENSMUSG00000020160	ENSMUSG00000033306
ENSMUSG00000028480	ENSMUSG00000029641	ENSMUSG00000033326
ENSMUSG00000044813	ENSMUSG00000045034	ENSMUSG00000033350
ENSMUSG00000035551	ENSMUSG00000002699	ENSMUSG00000033365
ENSMUSG00000066152	ENSMUSG00000031965	ENSMUSG00000033423
ENSMUSG00000008489	ENSMUSG00000025370	ENSMUSG00000033450
ENSMUSG00000013495	ENSMUSG00000006179	ENSMUSG00000033453
ENSMUSG00000054675	ENSMUSG00000033967	ENSMUSG00000033596
ENSMUSG00000042010	ENSMUSG00000004631	ENSMUSG00000033615
ENSMUSG00000029544	ENSMUSG00000067653	ENSMUSG00000033676
ENSMUSG00000043913	ENSMUSG00000020447	ENSMUSG00000033684
ENSMUSG00000029359	ENSMUSG00000032807	ENSMUSG00000033722
ENSMUSG00000029603	ENSMUSG00000089804	ENSMUSG00000033730
ENSMUSG00000029420	ENSMUSG00000058571	ENSMUSG00000033735
ENSMUSG00000043614	ENSMUSG00000039153	ENSMUSG00000033752
ENSMUSG00000006143	ENSMUSG00000073627	ENSMUSG00000033768
ENSMUSG00000005057	ENSMUSG00000029771	ENSMUSG00000033967
ENSMUSG00000036687	ENSMUSG00000035104	ENSMUSG00000033985
ENSMUSG00000050822	ENSMUSG00000037990	ENSMUSG00000034006
ENSMUSG00000029651	ENSMUSG00000064247	ENSMUSG00000034042
ENSMUSG00000036596	ENSMUSG00000022847	ENSMUSG00000034101
ENSMUSG00000037822	ENSMUSG00000050447	ENSMUSG00000034145
ENSMUSG00000029231	ENSMUSG00000069171	ENSMUSG00000034168
ENSMUSG00000053030	ENSMUSG00000059022	ENSMUSG00000034295
ENSMUSG00000030170	ENSMUSG00000048915	ENSMUSG00000034371
ENSMUSG00000038527	ENSMUSG00000033847	ENSMUSG00000034391
ENSMUSG00000038167	ENSMUSG00000074340	ENSMUSG00000034452
ENSMUSG00000029816	ENSMUSG00000078588	ENSMUSG00000034486
ENSMUSG00000049553	ENSMUSG00000027559	ENSMUSG00000034591
ENSMUSG00000071341	ENSMUSG00000026668	ENSMUSG00000034648
ENSMUSG00000015053	ENSMUSG00000028631	ENSMUSG00000034684
ENSMUSG00000047767	ENSMUSG00000017446	ENSMUSG00000034813
ENSMUSG00000007946	ENSMUSG00000048217	ENSMUSG00000035000
ENSMUSG00000030882	ENSMUSG00000031137	ENSMUSG00000035069
ENSMUSG00000030770	ENSMUSG00000023467	ENSMUSG00000035104
ENSMUSG00000095115	ENSMUSG00000027360	ENSMUSG00000035179
ENSMUSG00000052301	ENSMUSG00000094985	ENSMUSG00000035199
ENSMUSG00000041836	ENSMUSG00000029650	ENSMUSG00000035212
ENSMUSG00000010476	ENSMUSG00000079499	ENSMUSG00000035275
ENSMUSG00000078566	ENSMUSG00000044352	ENSMUSG00000035852
ENSMUSG00000018819	ENSMUSG00000032368	ENSMUSG00000036030
ENSMUSG00000049848	ENSMUSG00000028327	ENSMUSG00000036295
ENSMUSG00000074277	ENSMUSG00000046367	ENSMUSG00000036334
ENSMUSG00000040907	ENSMUSG00000033730	ENSMUSG00000036377
ENSMUSG00000002602	ENSMUSG00000003411	ENSMUSG00000036390
ENSMUSG00000030584	ENSMUSG00000064057	ENSMUSG00000036402
ENSMUSG00000036560	ENSMUSG00000027168	ENSMUSG00000036699
ENSMUSG00000030494	ENSMUSG00000073652	ENSMUSG00000036863
ENSMUSG00000030492	ENSMUSG00000038239	ENSMUSG00000036918
ENSMUSG00000030491	ENSMUSG00000050035	ENSMUSG00000037035
ENSMUSG00000047085	ENSMUSG00000025551	ENSMUSG00000037138
ENSMUSG00000038670	ENSMUSG00000026357	ENSMUSG00000037169
ENSMUSG00000044562	ENSMUSG00000028555	ENSMUSG00000037206
ENSMUSG00000003271	ENSMUSG00000024512	ENSMUSG00000037336
ENSMUSG00000040212	ENSMUSG00000074136	ENSMUSG00000037375
ENSMUSG00000053367	ENSMUSG00000040254	ENSMUSG00000037428
ENSMUSG00000030551	ENSMUSG00000024347	ENSMUSG00000037469
ENSMUSG00000025104	ENSMUSG00000058589	ENSMUSG00000037606
ENSMUSG00000090958	ENSMUSG00000021055	ENSMUSG00000037621
ENSMUSG00000014837	ENSMUSG00000073758	ENSMUSG00000037679
ENSMUSG00000038872	ENSMUSG00000042078	ENSMUSG00000037685
ENSMUSG00000001672	ENSMUSG00000005107	ENSMUSG00000037747
ENSMUSG00000033763	ENSMUSG00000021070	ENSMUSG00000037868
ENSMUSG00000031750	ENSMUSG00000001823	ENSMUSG00000037989
ENSMUSG00000012519	ENSMUSG00000006395	ENSMUSG00000037990
ENSMUSG00000055435	ENSMUSG00000097113	ENSMUSG00000038037
ENSMUSG00000031758	ENSMUSG00000045053	ENSMUSG00000038058
ENSMUSG00000034330	ENSMUSG00000024784	ENSMUSG00000038074
ENSMUSG00000031841	ENSMUSG00000016179	ENSMUSG00000038244
ENSMUSG00000031837	ENSMUSG00000041000	ENSMUSG00000038331
ENSMUSG00000024266	ENSMUSG00000034413	ENSMUSG00000038349
ENSMUSG00000031828	ENSMUSG00000027833	ENSMUSG00000038354
ENSMUSG00000031826	ENSMUSG00000033308	ENSMUSG00000038403
ENSMUSG00000046714	ENSMUSG00000040380	ENSMUSG00000038463
ENSMUSG00000061410	ENSMUSG00000030616	ENSMUSG00000038578
ENSMUSG00000025318	ENSMUSG00000085622	ENSMUSG00000038600
ENSMUSG00000040263	ENSMUSG00000097624	ENSMUSG00000038608
ENSMUSG00000035569	ENSMUSG00000030549	ENSMUSG00000038665
ENSMUSG00000034796	ENSMUSG00000085316	ENSMUSG00000038668
ENSMUSG00000033594	ENSMUSG00000103711	ENSMUSG00000038729
ENSMUSG00000032815	ENSMUSG00000085415	ENSMUSG00000038777
ENSMUSG00000039960	ENSMUSG00000025978	ENSMUSG00000038860
ENSMUSG00000019478	ENSMUSG00000030650	ENSMUSG00000039153
ENSMUSG00000050751	ENSMUSG00000032083	ENSMUSG00000039158
ENSMUSG00000031983	ENSMUSG00000037736	ENSMUSG00000039242
ENSMUSG00000036913	ENSMUSG00000043144	ENSMUSG00000039254
ENSMUSG00000031984	ENSMUSG00000038236	ENSMUSG00000039286
ENSMUSG00000031853	ENSMUSG00000061126	ENSMUSG00000039316
ENSMUSG00000085795	ENSMUSG00000057137	ENSMUSG00000039376
ENSMUSG00000039661	ENSMUSG00000046589	ENSMUSG00000039419
ENSMUSG00000031530	ENSMUSG00000000247	ENSMUSG00000039450
ENSMUSG00000031523	ENSMUSG00000044080	ENSMUSG00000039461
ENSMUSG00000031594	ENSMUSG00000015957	ENSMUSG00000039462
ENSMUSG00000064125	ENSMUSG00000022236	ENSMUSG00000039509
ENSMUSG00000070044	ENSMUSG00000052920	ENSMUSG00000039607
ENSMUSG00000038102	ENSMUSG00000028600	ENSMUSG00000039716
ENSMUSG00000031563	ENSMUSG00000045709	ENSMUSG00000039860
ENSMUSG00000031608	ENSMUSG00000028717	ENSMUSG00000040013
ENSMUSG00000054648	ENSMUSG00000085628	ENSMUSG00000040046
ENSMUSG00000002341	ENSMUSG00000063919	ENSMUSG00000040061
ENSMUSG00000087408	ENSMUSG00000020704	ENSMUSG00000040136
ENSMUSG00000049988	ENSMUSG00000023153	ENSMUSG00000040213
ENSMUSG00000000791	ENSMUSG00000047415	ENSMUSG00000040249
ENSMUSG00000007721	ENSMUSG00000026073	ENSMUSG00000040254
ENSMUSG00000031803	ENSMUSG00000039661	ENSMUSG00000040276
ENSMUSG00000070000	ENSMUSG00000046317	ENSMUSG00000040310
ENSMUSG00000062007	ENSMUSG00000070645	ENSMUSG00000040447
ENSMUSG00000044600	ENSMUSG00000043592	ENSMUSG00000040690
ENSMUSG00000034472	ENSMUSG00000028864	ENSMUSG00000040723
ENSMUSG00000036990	ENSMUSG00000096929	ENSMUSG00000040828
ENSMUSG00000054191	ENSMUSG00000085843	ENSMUSG00000040856
ENSMUSG00000053693	ENSMUSG00000079022	ENSMUSG00000040859
ENSMUSG00000005161	ENSMUSG00000000317	ENSMUSG00000040907
ENSMUSG00000074194	ENSMUSG00000000567	ENSMUSG00000040972
ENSMUSG00000031700	ENSMUSG00000000738	ENSMUSG00000041000
ENSMUSG00000043668	ENSMUSG00000000791	ENSMUSG00000041298
ENSMUSG00000031734	ENSMUSG00000001119	ENSMUSG00000041359
ENSMUSG00000031751	ENSMUSG00000001227	ENSMUSG00000041362
ENSMUSG00000031757	ENSMUSG00000001281	ENSMUSG00000041444
ENSMUSG00000031770	ENSMUSG00000001482	ENSMUSG00000041544
ENSMUSG00000090206	ENSMUSG00000001506	ENSMUSG00000041598
ENSMUSG00000031790	ENSMUSG00000001672	ENSMUSG00000041757
ENSMUSG00000031796	ENSMUSG00000001802	ENSMUSG00000041801
ENSMUSG00000031672	ENSMUSG00000001901	ENSMUSG00000042010
ENSMUSG00000039716	ENSMUSG00000001910	ENSMUSG00000042115
ENSMUSG00000032492	ENSMUSG00000002341	ENSMUSG00000042190
ENSMUSG00000086596	ENSMUSG00000002602	ENSMUSG00000042268
ENSMUSG00000039607	ENSMUSG00000002908	ENSMUSG00000042349
ENSMUSG00000092212	ENSMUSG00000002910	ENSMUSG00000042363
ENSMUSG00000032182	ENSMUSG00000003033	ENSMUSG00000042386
ENSMUSG00000032033	ENSMUSG00000003271	ENSMUSG00000042408
ENSMUSG00000032083	ENSMUSG00000003545	ENSMUSG00000042414
ENSMUSG00000032068	ENSMUSG00000003812	ENSMUSG00000042453
ENSMUSG00000038264	ENSMUSG00000003824	ENSMUSG00000042541
ENSMUSG00000032297	ENSMUSG00000004105	ENSMUSG00000042647
ENSMUSG00000033491	ENSMUSG00000004730	ENSMUSG00000042677
ENSMUSG00000032419	ENSMUSG00000004748	ENSMUSG00000042745
ENSMUSG00000097195	ENSMUSG00000005045	ENSMUSG00000042793
ENSMUSG00000032363	ENSMUSG00000005057	ENSMUSG00000042797
ENSMUSG00000054667	ENSMUSG00000005161	ENSMUSG00000042828
ENSMUSG00000031284	ENSMUSG00000005374	ENSMUSG00000042873
ENSMUSG00000041688	ENSMUSG00000005493	ENSMUSG00000043017
ENSMUSG00000025272	ENSMUSG00000005823	ENSMUSG00000043051
ENSMUSG00000067878	ENSMUSG00000005951	ENSMUSG00000043079
ENSMUSG00000031163	ENSMUSG00000005986	ENSMUSG00000043144
ENSMUSG00000026442	ENSMUSG00000006143	ENSMUSG00000043259
ENSMUSG00000026398	ENSMUSG00000006218	ENSMUSG00000043456
ENSMUSG00000026656	ENSMUSG00000006235	ENSMUSG00000043592
ENSMUSG00000026520	ENSMUSG00000006356	ENSMUSG00000044017
ENSMUSG00000054702	ENSMUSG00000007721	ENSMUSG00000044024
ENSMUSG00000020181	ENSMUSG00000007946	ENSMUSG00000044217
ENSMUSG00000020228	ENSMUSG00000010051	ENSMUSG00000044254
ENSMUSG00000025351	ENSMUSG00000010122	ENSMUSG00000044320
ENSMUSG00000040624	ENSMUSG00000010476	ENSMUSG00000044393
ENSMUSG00000038151	ENSMUSG00000011751	ENSMUSG00000044461
ENSMUSG00000020108	ENSMUSG00000012519	ENSMUSG00000044629
ENSMUSG00000051652	ENSMUSG00000013495	ENSMUSG00000044647
ENSMUSG00000045912	ENSMUSG00000014158	ENSMUSG00000044681
ENSMUSG00000003341	ENSMUSG00000014329	ENSMUSG00000044813
ENSMUSG00000078640	ENSMUSG00000014782	ENSMUSG00000044937
ENSMUSG00000050288	ENSMUSG00000014837	ENSMUSG00000045004
ENSMUSG00000020623	ENSMUSG00000015016	ENSMUSG00000045160
ENSMUSG00000000202	ENSMUSG00000015085	ENSMUSG00000045211
ENSMUSG00000043857	ENSMUSG00000015224	ENSMUSG00000045268
ENSMUSG00000017718	ENSMUSG00000015312	ENSMUSG00000045319
ENSMUSG00000039963	ENSMUSG00000015542	ENSMUSG00000045362
ENSMUSG00000039208	ENSMUSG00000015568	ENSMUSG00000045515
ENSMUSG00000032878	ENSMUSG00000015843	ENSMUSG00000045629
ENSMUSG00000023764	ENSMUSG00000015942	ENSMUSG00000045658
ENSMUSG00000018899	ENSMUSG00000017307	ENSMUSG00000045709
ENSMUSG00000020908	ENSMUSG00000017493	ENSMUSG00000045930
ENSMUSG00000023781	ENSMUSG00000017639	ENSMUSG00000045954
ENSMUSG00000069835	ENSMUSG00000017868	ENSMUSG00000046093
ENSMUSG00000018750	ENSMUSG00000018008	ENSMUSG00000046186
ENSMUSG00000044367	ENSMUSG00000018169	ENSMUSG00000046367
ENSMUSG00000000317	ENSMUSG00000018698	ENSMUSG00000046417
ENSMUSG00000017631	ENSMUSG00000018727	ENSMUSG00000046470
ENSMUSG00000001095	ENSMUSG00000019320	ENSMUSG00000046694
ENSMUSG00000017548	ENSMUSG00000019326	ENSMUSG00000046743
ENSMUSG00000046442	ENSMUSG00000019478	ENSMUSG00000046806
ENSMUSG00000034177	ENSMUSG00000020037	ENSMUSG00000046982
ENSMUSG00000003949	ENSMUSG00000020108	ENSMUSG00000046997
ENSMUSG00000020541	ENSMUSG00000020183	ENSMUSG00000047013
ENSMUSG00000038967	ENSMUSG00000020303	ENSMUSG00000047221
ENSMUSG00000018666	ENSMUSG00000020331	ENSMUSG00000047246
ENSMUSG00000017417	ENSMUSG00000020598	ENSMUSG00000047415
ENSMUSG00000017400	ENSMUSG00000020646	ENSMUSG00000047604
ENSMUSG00000017493	ENSMUSG00000020653	ENSMUSG00000047669
ENSMUSG00000021209	ENSMUSG00000020661	ENSMUSG00000047712
ENSMUSG00000040867	ENSMUSG00000020689	ENSMUSG00000047767
ENSMUSG00000037679	ENSMUSG00000020695	ENSMUSG00000047793
ENSMUSG00000006360	ENSMUSG00000020776	ENSMUSG00000047945
ENSMUSG00000049036	ENSMUSG00000020785	ENSMUSG00000047989
ENSMUSG00000048562	ENSMUSG00000020811	ENSMUSG00000048022
ENSMUSG00000020589	ENSMUSG00000020902	ENSMUSG00000048038
ENSMUSG00000020646	ENSMUSG00000020937	ENSMUSG00000048217
ENSMUSG00000019256	ENSMUSG00000021047	ENSMUSG00000048240
ENSMUSG00000020598	ENSMUSG00000021087	ENSMUSG00000048251
ENSMUSG00000035105	ENSMUSG00000021118	ENSMUSG00000048402
ENSMUSG00000060499	ENSMUSG00000021136	ENSMUSG00000048485
ENSMUSG00000073000	ENSMUSG00000021186	ENSMUSG00000048562
ENSMUSG00000034145	ENSMUSG00000021278	ENSMUSG00000048612
ENSMUSG00000047414	ENSMUSG00000021359	ENSMUSG00000048899
ENSMUSG00000021638	ENSMUSG00000021567	ENSMUSG00000048915
ENSMUSG00000021624	ENSMUSG00000021604	ENSMUSG00000049090
ENSMUSG00000021696	ENSMUSG00000021636	ENSMUSG00000049109
ENSMUSG00000021301	ENSMUSG00000021798	ENSMUSG00000049553
ENSMUSG00000041324	ENSMUSG00000021803	ENSMUSG00000049823
ENSMUSG00000021314	ENSMUSG00000021943	ENSMUSG00000049892
ENSMUSG00000069302	ENSMUSG00000021950	ENSMUSG00000050052
ENSMUSG00000053216	ENSMUSG00000022270	ENSMUSG00000050069
ENSMUSG00000048978	ENSMUSG00000022361	ENSMUSG00000050234
ENSMUSG00000054889	ENSMUSG00000022432	ENSMUSG00000050357
ENSMUSG00000034891	ENSMUSG00000022464	ENSMUSG00000050370
ENSMUSG00000052981	ENSMUSG00000022475	ENSMUSG00000050556
ENSMUSG00000069171	ENSMUSG00000022489	ENSMUSG00000050700
ENSMUSG00000069170	ENSMUSG00000022519	ENSMUSG00000050737
ENSMUSG00000033083	ENSMUSG00000022595	ENSMUSG00000050751
ENSMUSG00000025551	ENSMUSG00000022619	ENSMUSG00000050822
ENSMUSG00000021733	ENSMUSG00000022623	ENSMUSG00000050856
ENSMUSG00000058317	ENSMUSG00000022683	ENSMUSG00000050989
ENSMUSG00000040726	ENSMUSG00000022750	ENSMUSG00000051067
ENSMUSG00000021798	ENSMUSG00000022952	ENSMUSG00000051236
ENSMUSG00000022176	ENSMUSG00000023017	ENSMUSG00000051331
ENSMUSG00000079197	ENSMUSG00000023039	ENSMUSG00000051652
ENSMUSG00000023411	ENSMUSG00000023045	ENSMUSG00000051726
ENSMUSG00000075592	ENSMUSG00000023868	ENSMUSG00000051855
ENSMUSG00000000365	ENSMUSG00000024039	ENSMUSG00000051951
ENSMUSG00000021990	ENSMUSG00000024059	ENSMUSG00000052133
ENSMUSG00000021930	ENSMUSG00000024063	ENSMUSG00000052135
ENSMUSG00000046204	ENSMUSG00000024066	ENSMUSG00000052316
ENSMUSG00000022003	ENSMUSG00000024087	ENSMUSG00000052353
ENSMUSG00000049382	ENSMUSG00000024164	ENSMUSG00000052374
ENSMUSG00000001656	ENSMUSG00000024228	ENSMUSG00000052572
ENSMUSG00000005125	ENSMUSG00000024266	ENSMUSG00000052713
ENSMUSG00000016552	ENSMUSG00000024424	ENSMUSG00000052889
ENSMUSG00000049687	ENSMUSG00000024459	ENSMUSG00000052981
ENSMUSG00000036298	ENSMUSG00000024526	ENSMUSG00000053024
ENSMUSG00000036273	ENSMUSG00000024851	ENSMUSG00000053338
ENSMUSG00000072235	ENSMUSG00000024905	ENSMUSG00000053799
ENSMUSG00000023484	ENSMUSG00000024940	ENSMUSG00000053930
ENSMUSG00000043391	ENSMUSG00000025064	ENSMUSG00000054136
ENSMUSG00000022887	ENSMUSG00000025069	ENSMUSG00000054702
ENSMUSG00000035629	ENSMUSG00000025104	ENSMUSG00000055003
ENSMUSG00000022837	ENSMUSG00000025219	ENSMUSG00000055044
ENSMUSG00000052917	ENSMUSG00000025272	ENSMUSG00000055322
ENSMUSG00000052504	ENSMUSG00000025318	ENSMUSG00000055421
ENSMUSG00000053062	ENSMUSG00000025328	ENSMUSG00000055435
ENSMUSG00000025612	ENSMUSG00000025351	ENSMUSG00000055447
ENSMUSG00000022969	ENSMUSG00000025395	ENSMUSG00000055780
ENSMUSG00000097624	ENSMUSG00000025420	ENSMUSG00000055874
ENSMUSG00000025736	ENSMUSG00000025743	ENSMUSG00000056220
ENSMUSG00000025732	ENSMUSG00000025876	ENSMUSG00000056258
ENSMUSG00000055202	ENSMUSG00000026211	ENSMUSG00000056427
ENSMUSG00000003534	ENSMUSG00000026482	ENSMUSG00000056602
ENSMUSG00000073406	ENSMUSG00000026649	ENSMUSG00000056665
ENSMUSG00000086930	ENSMUSG00000026687	ENSMUSG00000056698
ENSMUSG00000043592	ENSMUSG00000026715	ENSMUSG00000057191
ENSMUSG00000039316	ENSMUSG00000026976	ENSMUSG00000057278
ENSMUSG00000039481	ENSMUSG00000027030	ENSMUSG00000057375
ENSMUSG00000048915	ENSMUSG00000027075	ENSMUSG00000057751
ENSMUSG00000062327	ENSMUSG00000027107	ENSMUSG00000057914
ENSMUSG00000034295	ENSMUSG00000027201	ENSMUSG00000058006
ENSMUSG00000024376	ENSMUSG00000027204	ENSMUSG00000058099
ENSMUSG00000044719	ENSMUSG00000027223	ENSMUSG00000058135
ENSMUSG00000024232	ENSMUSG00000027239	ENSMUSG00000058586
ENSMUSG00000056130	ENSMUSG00000027356	ENSMUSG00000058589
ENSMUSG00000019647	ENSMUSG00000027368	ENSMUSG00000059089
ENSMUSG00000043079	ENSMUSG00000027457	ENSMUSG00000059900
ENSMUSG00000024558	ENSMUSG00000027525	ENSMUSG00000059991
ENSMUSG00000034371	ENSMUSG00000027570	ENSMUSG00000060224
ENSMUSG00000058624	ENSMUSG00000027674	ENSMUSG00000060288
ENSMUSG00000052920	ENSMUSG00000027947	ENSMUSG00000060969
ENSMUSG00000050370	ENSMUSG00000027955	ENSMUSG00000061126
ENSMUSG00000025203	ENSMUSG00000027993	ENSMUSG00000061132
ENSMUSG00000025069	ENSMUSG00000027994	ENSMUSG00000061186
ENSMUSG00000024784	ENSMUSG00000027996	ENSMUSG00000061601
ENSMUSG00000033768	ENSMUSG00000028078	ENSMUSG00000061887
ENSMUSG00000024970	ENSMUSG00000028109	ENSMUSG00000061894
ENSMUSG00000027347	ENSMUSG00000028173	ENSMUSG00000062327
ENSMUSG00000027238	ENSMUSG00000028224	ENSMUSG00000062960
ENSMUSG00000027200	ENSMUSG00000028289	ENSMUSG00000062980
ENSMUSG00000027400	ENSMUSG00000028369	ENSMUSG00000063415
ENSMUSG00000027273	ENSMUSG00000028435	ENSMUSG00000063430
ENSMUSG00000068115	ENSMUSG00000028459	ENSMUSG00000064080
ENSMUSG00000074682	ENSMUSG00000028480	ENSMUSG00000064289
ENSMUSG00000039648	ENSMUSG00000028602	ENSMUSG00000066060
ENSMUSG00000038718	ENSMUSG00000028785	ENSMUSG00000066113
ENSMUSG00000026873	ENSMUSG00000028834	ENSMUSG00000066607
ENSMUSG00000046618	ENSMUSG00000028909	ENSMUSG00000067071
ENSMUSG00000026668	ENSMUSG00000028937	ENSMUSG00000067586
ENSMUSG00000026950	ENSMUSG00000029049	ENSMUSG00000067786
ENSMUSG00000054580	ENSMUSG00000029055	ENSMUSG00000068115
ENSMUSG00000035000	ENSMUSG00000029126	ENSMUSG00000068196
ENSMUSG00000026893	ENSMUSG00000029151	ENSMUSG00000068323
ENSMUSG00000034848	ENSMUSG00000029231	ENSMUSG00000068373
ENSMUSG00000056436	ENSMUSG00000029359	ENSMUSG00000068551
ENSMUSG00000027221	ENSMUSG00000029419	ENSMUSG00000068663
ENSMUSG00000027215	ENSMUSG00000029420	ENSMUSG00000069170
ENSMUSG00000044468	ENSMUSG00000029423	ENSMUSG00000069581
ENSMUSG00000068762	ENSMUSG00000029484	ENSMUSG00000070473
ENSMUSG00000054426	ENSMUSG00000029522	ENSMUSG00000070732
ENSMUSG00000028121	ENSMUSG00000029544	ENSMUSG00000070737
ENSMUSG00000028031	ENSMUSG00000029556	ENSMUSG00000070942
ENSMUSG00000005493	ENSMUSG00000029570	ENSMUSG00000071454
ENSMUSG00000028179	ENSMUSG00000029603	ENSMUSG00000072949
ENSMUSG00000074653	ENSMUSG00000029651	ENSMUSG00000073018
ENSMUSG00000037892	ENSMUSG00000029699	ENSMUSG00000073633
ENSMUSG00000027800	ENSMUSG00000029816	ENSMUSG00000073652
ENSMUSG00000027499	ENSMUSG00000030170	ENSMUSG00000073678
ENSMUSG00000042766	ENSMUSG00000030491	ENSMUSG00000073755
ENSMUSG00000028042	ENSMUSG00000030492	ENSMUSG00000073758
ENSMUSG00000041912	ENSMUSG00000030494	ENSMUSG00000074647
ENSMUSG00000038403	ENSMUSG00000030499	ENSMUSG00000074657
ENSMUSG00000028655	ENSMUSG00000030519	ENSMUSG00000074916
ENSMUSG00000028909	ENSMUSG00000030584	ENSMUSG00000074923
ENSMUSG00000086290	ENSMUSG00000030739	ENSMUSG00000074968
ENSMUSG00000028661	ENSMUSG00000030770	ENSMUSG00000075023
ENSMUSG00000078234	ENSMUSG00000030772	ENSMUSG00000075304
ENSMUSG00000028976	ENSMUSG00000030839	ENSMUSG00000075394
ENSMUSG00000062064	ENSMUSG00000030849	ENSMUSG00000076441
ENSMUSG00000028972	ENSMUSG00000030882	ENSMUSG00000078190
ENSMUSG00000058006	ENSMUSG00000031163	ENSMUSG00000078202
ENSMUSG00000045083	ENSMUSG00000031530	ENSMUSG00000079056
ENSMUSG00000038578	ENSMUSG00000031563	ENSMUSG00000079484
ENSMUSG00000028370	ENSMUSG00000031586	ENSMUSG00000079592
ENSMUSG00000038368	ENSMUSG00000031594	ENSMUSG00000079654
ENSMUSG00000043753	ENSMUSG00000031605	ENSMUSG00000084883
ENSMUSG00000057315	ENSMUSG00000031616	ENSMUSG00000084989
ENSMUSG00000050856	ENSMUSG00000031672	ENSMUSG00000085628
ENSMUSG00000097767	ENSMUSG00000031673	ENSMUSG00000085631
ENSMUSG00000042190	ENSMUSG00000031709	ENSMUSG00000085795
ENSMUSG00000048163	ENSMUSG00000031730	ENSMUSG00000085843
ENSMUSG00000029602	ENSMUSG00000031734	ENSMUSG00000086859
ENSMUSG00000061979	ENSMUSG00000031736	ENSMUSG00000087236
ENSMUSG00000040751	ENSMUSG00000031750	ENSMUSG00000087259
ENSMUSG00000049551	ENSMUSG00000031751	ENSMUSG00000087408
ENSMUSG00000039860	ENSMUSG00000031757	ENSMUSG00000087651
ENSMUSG00000038859	ENSMUSG00000031758	ENSMUSG00000090053
ENSMUSG00000041298	ENSMUSG00000031770	ENSMUSG00000090564
ENSMUSG00000050010	ENSMUSG00000031789	ENSMUSG00000090958
ENSMUSG00000036256	ENSMUSG00000031790	ENSMUSG00000091625
ENSMUSG00000037605	ENSMUSG00000031796	ENSMUSG00000096370
ENSMUSG00000059900	ENSMUSG00000031803	ENSMUSG00000097624
ENSMUSG00000038521	ENSMUSG00000031826	ENSMUSG00000097639
ENSMUSG00000072772	ENSMUSG00000031828	ENSMUSG00000097772
ENSMUSG00000098318	ENSMUSG00000031837	ENSMUSG00000097929
ENSMUSG00000029762	ENSMUSG00000031841	ENSMUSG00000000202
ENSMUSG00000029664	ENSMUSG00000031849	ENSMUSG00000000317
ENSMUSG00000037826	ENSMUSG00000031853	ENSMUSG00000000365
ENSMUSG00000033735	ENSMUSG00000031860	ENSMUSG00000000567
ENSMUSG00000029999	ENSMUSG00000031875	ENSMUSG00000000738
ENSMUSG00000030966	ENSMUSG00000031891	ENSMUSG00000000791
ENSMUSG00000048782	ENSMUSG00000031910	ENSMUSG00000001095
ENSMUSG00000042105	ENSMUSG00000031958	ENSMUSG00000001131
ENSMUSG00000030849	ENSMUSG00000031959	ENSMUSG00000001348
ENSMUSG00000091002	ENSMUSG00000031974	ENSMUSG00000001472
ENSMUSG00000041309	ENSMUSG00000031983	ENSMUSG00000001482
ENSMUSG00000038745	ENSMUSG00000031984	ENSMUSG00000001656
ENSMUSG00000054065	ENSMUSG00000031987	ENSMUSG00000001672
ENSMUSG00000025509	ENSMUSG00000032033	ENSMUSG00000001802
ENSMUSG00000010760	ENSMUSG00000032068	ENSMUSG00000001870
ENSMUSG00000003545	ENSMUSG00000032172	ENSMUSG00000001911
ENSMUSG00000002043	ENSMUSG00000032177	ENSMUSG00000002043
ENSMUSG00000058741	ENSMUSG00000032182	ENSMUSG00000002847
ENSMUSG00000011751	ENSMUSG00000032297	ENSMUSG00000002910
ENSMUSG00000037463	ENSMUSG00000032419	ENSMUSG00000003341
ENSMUSG00000030592	ENSMUSG00000032477	ENSMUSG00000003410
ENSMUSG00000037166	ENSMUSG00000032492	ENSMUSG00000003545
ENSMUSG00000036892	ENSMUSG00000032511	ENSMUSG00000003657
ENSMUSG00000054753	ENSMUSG00000032548	ENSMUSG00000003812
ENSMUSG00000001802	ENSMUSG00000032815	ENSMUSG00000003949
ENSMUSG00000023072	ENSMUSG00000032839	ENSMUSG00000004038
ENSMUSG00000055809	ENSMUSG00000032841	ENSMUSG00000004730
ENSMUSG00000038239	ENSMUSG00000032878	ENSMUSG00000005045
ENSMUSG00000042918	ENSMUSG00000033316	ENSMUSG00000005057
ENSMUSG00000055978	ENSMUSG00000033491	ENSMUSG00000005125
ENSMUSG00000040231	ENSMUSG00000033594	ENSMUSG00000005267
ENSMUSG00000025324	ENSMUSG00000033596	ENSMUSG00000005493
ENSMUSG00000025726	ENSMUSG00000033752	ENSMUSG00000005583
ENSMUSG00000030616	ENSMUSG00000033763	ENSMUSG00000005803
ENSMUSG00000052572	ENSMUSG00000033768	ENSMUSG00000006179
ENSMUSG00000031875	ENSMUSG00000034116	ENSMUSG00000006360
ENSMUSG00000048371	ENSMUSG00000034156	ENSMUSG00000006567
ENSMUSG00000033249	ENSMUSG00000034161	ENSMUSG00000007594
ENSMUSG00000014786	ENSMUSG00000034255	ENSMUSG00000008398
ENSMUSG00000050357	ENSMUSG00000034330	ENSMUSG00000008489
ENSMUSG00000031906	ENSMUSG00000034336	ENSMUSG00000008540
ENSMUSG00000003657	ENSMUSG00000034449	ENSMUSG00000009687
ENSMUSG00000033596	ENSMUSG00000034472	ENSMUSG00000010760
ENSMUSG00000031958	ENSMUSG00000034486	ENSMUSG00000011751
ENSMUSG00000055835	ENSMUSG00000034518	ENSMUSG00000013495
ENSMUSG00000031953	ENSMUSG00000034522	ENSMUSG00000014782
ENSMUSG00000031952	ENSMUSG00000034591	ENSMUSG00000014786
ENSMUSG00000046844	ENSMUSG00000034648	ENSMUSG00000015224
ENSMUSG00000052557	ENSMUSG00000034768	ENSMUSG00000016552
ENSMUSG00000031832	ENSMUSG00000034796	ENSMUSG00000017400
ENSMUSG00000040010	ENSMUSG00000034845	ENSMUSG00000017548
ENSMUSG00000000738	ENSMUSG00000034908	ENSMUSG00000017631
ENSMUSG00000019278	ENSMUSG00000034936	ENSMUSG00000017718
ENSMUSG00000001472	ENSMUSG00000035041	ENSMUSG00000017868
ENSMUSG00000001482	ENSMUSG00000035131	ENSMUSG00000018217
ENSMUSG00000031970	ENSMUSG00000035179	ENSMUSG00000018569
ENSMUSG00000031971	ENSMUSG00000035314	ENSMUSG00000018666
ENSMUSG00000043068	ENSMUSG00000035547	ENSMUSG00000018750
ENSMUSG00000031985	ENSMUSG00000035551	ENSMUSG00000018899
ENSMUSG00000093904	ENSMUSG00000035557	ENSMUSG00000019256
ENSMUSG00000037492	ENSMUSG00000035569	ENSMUSG00000019278
ENSMUSG00000052906	ENSMUSG00000035914	ENSMUSG00000019647
ENSMUSG00000031586	ENSMUSG00000036298	ENSMUSG00000020020
ENSMUSG00000050271	ENSMUSG00000036334	ENSMUSG00000020160
ENSMUSG00000039633	ENSMUSG00000036377	ENSMUSG00000020277
ENSMUSG00000039620	ENSMUSG00000036560	ENSMUSG00000020303
ENSMUSG00000039478	ENSMUSG00000036596	ENSMUSG00000020427
ENSMUSG00000039470	ENSMUSG00000036661	ENSMUSG00000020541
ENSMUSG00000038069	ENSMUSG00000036687	ENSMUSG00000020589
ENSMUSG00000039396	ENSMUSG00000036862	ENSMUSG00000020598
ENSMUSG00000058056	ENSMUSG00000036913	ENSMUSG00000020604
ENSMUSG00000053626	ENSMUSG00000036990	ENSMUSG00000020623
ENSMUSG00000025521	ENSMUSG00000037025	ENSMUSG00000020646
ENSMUSG00000036306	ENSMUSG00000037104	ENSMUSG00000020661
ENSMUSG00000079038	ENSMUSG00000037139	ENSMUSG00000020689
ENSMUSG00000031861	ENSMUSG00000037280	ENSMUSG00000020695
ENSMUSG00000071078	ENSMUSG00000037335	ENSMUSG00000020704
ENSMUSG00000038508	ENSMUSG00000037754	ENSMUSG00000020811
ENSMUSG00000031848	ENSMUSG00000037822	ENSMUSG00000020844
ENSMUSG00000031842	ENSMUSG00000037843	ENSMUSG00000020865
ENSMUSG00000031833	ENSMUSG00000037989	ENSMUSG00000020908
ENSMUSG00000002910	ENSMUSG00000038102	ENSMUSG00000020953
ENSMUSG00000046718	ENSMUSG00000038155	ENSMUSG00000021047
ENSMUSG00000045248	ENSMUSG00000038156	ENSMUSG00000021209
ENSMUSG00000048148	ENSMUSG00000038244	ENSMUSG00000021301
ENSMUSG00000031688	ENSMUSG00000038264	ENSMUSG00000021314
ENSMUSG00000047747	ENSMUSG00000038400	ENSMUSG00000021375
ENSMUSG00000031709	ENSMUSG00000038527	ENSMUSG00000021587
ENSMUSG00000047986	ENSMUSG00000038578	ENSMUSG00000021624
ENSMUSG00000053226	ENSMUSG00000038602	ENSMUSG00000021638
ENSMUSG00000003812	ENSMUSG00000038665	ENSMUSG00000021696
ENSMUSG00000036934	ENSMUSG00000038668	ENSMUSG00000021699
ENSMUSG00000031660	ENSMUSG00000038670	ENSMUSG00000021732
ENSMUSG00000031661	ENSMUSG00000038745	ENSMUSG00000021733
ENSMUSG00000056608	ENSMUSG00000038860	ENSMUSG00000021803
ENSMUSG00000031740	ENSMUSG00000038872	ENSMUSG00000021930
ENSMUSG00000031754	ENSMUSG00000038976	ENSMUSG00000021983
ENSMUSG00000031775	ENSMUSG00000039059	ENSMUSG00000022003
ENSMUSG00000046556	ENSMUSG00000039208	ENSMUSG00000022054
ENSMUSG00000036598	ENSMUSG00000039377	ENSMUSG00000022176
ENSMUSG00000032477	ENSMUSG00000039419	ENSMUSG00000022237
ENSMUSG00000063488	ENSMUSG00000039457	ENSMUSG00000022422
ENSMUSG00000003410	ENSMUSG00000039470	ENSMUSG00000022464
ENSMUSG00000001348	ENSMUSG00000039607	ENSMUSG00000022483
ENSMUSG00000041624	ENSMUSG00000039623	ENSMUSG00000022489
ENSMUSG00000032047	ENSMUSG00000039716	ENSMUSG00000022490
ENSMUSG00000035200	ENSMUSG00000039838	ENSMUSG00000022508
ENSMUSG00000049556	ENSMUSG00000039960	ENSMUSG00000022543
ENSMUSG00000032192	ENSMUSG00000039963	ENSMUSG00000022629
ENSMUSG00000097574	ENSMUSG00000039976	ENSMUSG00000022837
ENSMUSG00000031314	ENSMUSG00000039989	ENSMUSG00000022887
ENSMUSG00000086370	ENSMUSG00000040102	ENSMUSG00000022900
ENSMUSG00000049929	ENSMUSG00000040212	ENSMUSG00000022952
ENSMUSG00000025257	ENSMUSG00000040249	ENSMUSG00000022969
ENSMUSG00000071665	ENSMUSG00000040258	ENSMUSG00000023017
ENSMUSG00000001131	ENSMUSG00000040263	ENSMUSG00000023022
ENSMUSG00000036699	ENSMUSG00000040310	ENSMUSG00000023072
ENSMUSG00000031146	ENSMUSG00000040412	ENSMUSG00000023349
ENSMUSG00000025059	ENSMUSG00000040447	ENSMUSG00000023411
	ENSMUSG00000040653	ENSMUSG00000023484
	ENSMUSG00000040875	ENSMUSG00000023764
	ENSMUSG00000040907	ENSMUSG00000023781
	ENSMUSG00000040969	ENSMUSG00000023903
	ENSMUSG00000041046	ENSMUSG00000023927
	ENSMUSG00000041193	ENSMUSG00000024232
	ENSMUSG00000041237	ENSMUSG00000024376
	ENSMUSG00000041598	ENSMUSG00000024697
	ENSMUSG00000041688	ENSMUSG00000024778
	ENSMUSG00000041729	ENSMUSG00000024784
	ENSMUSG00000041831	ENSMUSG00000024810
	ENSMUSG00000041836	ENSMUSG00000024887
	ENSMUSG00000041949	ENSMUSG00000024970
	ENSMUSG00000042010	ENSMUSG00000025002
	ENSMUSG00000042115	ENSMUSG00000025041
	ENSMUSG00000042213	ENSMUSG00000025059
	ENSMUSG00000042286	ENSMUSG00000025069
	ENSMUSG00000042345	ENSMUSG00000025083
	ENSMUSG00000042377	ENSMUSG00000025203
	ENSMUSG00000042745	ENSMUSG00000025318
	ENSMUSG00000042793	ENSMUSG00000025324
	ENSMUSG00000043051	ENSMUSG00000025351
	ENSMUSG00000043099	ENSMUSG00000025408
	ENSMUSG00000043157	ENSMUSG00000025509
	ENSMUSG00000043456	ENSMUSG00000025521
	ENSMUSG00000043614	ENSMUSG00000025537
	ENSMUSG00000043913	ENSMUSG00000025551
	ENSMUSG00000044006	ENSMUSG00000025591
	ENSMUSG00000044017	ENSMUSG00000025726
	ENSMUSG00000044026	ENSMUSG00000025732
	ENSMUSG00000044338	ENSMUSG00000025736
	ENSMUSG00000044349	ENSMUSG00000025856
	ENSMUSG00000044461	ENSMUSG00000025887
	ENSMUSG00000044562	ENSMUSG00000026278
	ENSMUSG00000044600	ENSMUSG00000026357
	ENSMUSG00000044813	ENSMUSG00000026520
	ENSMUSG00000044976	ENSMUSG00000026535
	ENSMUSG00000045211	ENSMUSG00000026656
	ENSMUSG00000045532	ENSMUSG00000026668
	ENSMUSG00000045912	ENSMUSG00000026824
	ENSMUSG00000045932	ENSMUSG00000026873
	ENSMUSG00000046186	ENSMUSG00000026893
	ENSMUSG00000046323	ENSMUSG00000026950
	ENSMUSG00000046408	ENSMUSG00000026994
	ENSMUSG00000046714	ENSMUSG00000027168
	ENSMUSG00000046982	ENSMUSG00000027200
	ENSMUSG00000046999	ENSMUSG00000027210
	ENSMUSG00000047085	ENSMUSG00000027238
	ENSMUSG00000047250	ENSMUSG00000027273
	ENSMUSG00000047586	ENSMUSG00000027356
	ENSMUSG00000047591	ENSMUSG00000027400
	ENSMUSG00000047669	ENSMUSG00000027457
	ENSMUSG00000047747	ENSMUSG00000027520
	ENSMUSG00000047767	ENSMUSG00000027525
	ENSMUSG00000047793	ENSMUSG00000027800
	ENSMUSG00000047986	ENSMUSG00000027868
	ENSMUSG00000047989	ENSMUSG00000027977
	ENSMUSG00000048038	ENSMUSG00000027985
	ENSMUSG00000048096	ENSMUSG00000028031
	ENSMUSG00000048138	ENSMUSG00000028042
	ENSMUSG00000048583	ENSMUSG00000028173
	ENSMUSG00000048731	ENSMUSG00000028370
	ENSMUSG00000048832	ENSMUSG00000028496
	ENSMUSG00000049044	ENSMUSG00000028565
	ENSMUSG00000049090	ENSMUSG00000028573
	ENSMUSG00000049097	ENSMUSG00000028655
	ENSMUSG00000049553	ENSMUSG00000028661
	ENSMUSG00000049848	ENSMUSG00000028864
	ENSMUSG00000049907	ENSMUSG00000028937
	ENSMUSG00000049988	ENSMUSG00000028940
	ENSMUSG00000050002	ENSMUSG00000028972
	ENSMUSG00000050751	ENSMUSG00000028976
	ENSMUSG00000050762	ENSMUSG00000029093
	ENSMUSG00000050822	ENSMUSG00000029108
	ENSMUSG00000050908	ENSMUSG00000029423
	ENSMUSG00000050966	ENSMUSG00000029522
	ENSMUSG00000050989	ENSMUSG00000029632
	ENSMUSG00000051067	ENSMUSG00000029641
	ENSMUSG00000051279	ENSMUSG00000029651
	ENSMUSG00000051455	ENSMUSG00000029664
	ENSMUSG00000051652	ENSMUSG00000029715
	ENSMUSG00000052085	ENSMUSG00000030047
	ENSMUSG00000052117	ENSMUSG00000030110
	ENSMUSG00000052133	ENSMUSG00000030255
	ENSMUSG00000052301	ENSMUSG00000030329
	ENSMUSG00000052369	ENSMUSG00000030350
	ENSMUSG00000052397	ENSMUSG00000030492
	ENSMUSG00000052504	ENSMUSG00000030494
	ENSMUSG00000052557	ENSMUSG00000030551
	ENSMUSG00000052889	ENSMUSG00000030584
	ENSMUSG00000053030	ENSMUSG00000030616
	ENSMUSG00000053063	ENSMUSG00000030669
	ENSMUSG00000053367	ENSMUSG00000030739
	ENSMUSG00000053693	ENSMUSG00000030752
	ENSMUSG00000053930	ENSMUSG00000030757
	ENSMUSG00000053965	ENSMUSG00000030772
	ENSMUSG00000054065	ENSMUSG00000030849
	ENSMUSG00000054191	ENSMUSG00000030882
	ENSMUSG00000054648	ENSMUSG00000030911
	ENSMUSG00000054667	ENSMUSG00000030930
	ENSMUSG00000054675	ENSMUSG00000030966
	ENSMUSG00000054728	ENSMUSG00000031129
	ENSMUSG00000055447	ENSMUSG00000031146
	ENSMUSG00000055865	ENSMUSG00000031163
	ENSMUSG00000056185	ENSMUSG00000031169
	ENSMUSG00000056608	ENSMUSG00000031217
	ENSMUSG00000056758	ENSMUSG00000031284
	ENSMUSG00000056812	ENSMUSG00000031314
	ENSMUSG00000056972	ENSMUSG00000031523
	ENSMUSG00000057234	ENSMUSG00000031558
	ENSMUSG00000057315	ENSMUSG00000031563
	ENSMUSG00000057914	ENSMUSG00000031616
	ENSMUSG00000058183	ENSMUSG00000031647
	ENSMUSG00000058441	ENSMUSG00000031660
	ENSMUSG00000059326	ENSMUSG00000031661
	ENSMUSG00000059361	ENSMUSG00000031672
	ENSMUSG00000059456	ENSMUSG00000031673
	ENSMUSG00000060131	ENSMUSG00000031700
	ENSMUSG00000060499	ENSMUSG00000031709
	ENSMUSG00000060572	ENSMUSG00000031740
	ENSMUSG00000061086	ENSMUSG00000031751
	ENSMUSG00000061410	ENSMUSG00000031754
	ENSMUSG00000062007	ENSMUSG00000031758
	ENSMUSG00000062151	ENSMUSG00000031770
	ENSMUSG00000062175	ENSMUSG00000031775
	ENSMUSG00000062393	ENSMUSG00000031789
	ENSMUSG00000062591	ENSMUSG00000031790
	ENSMUSG00000063049	ENSMUSG00000031796
	ENSMUSG00000063605	ENSMUSG00000031803
	ENSMUSG00000063672	ENSMUSG00000031832
	ENSMUSG00000064125	ENSMUSG00000031833
	ENSMUSG00000066152	ENSMUSG00000031841
	ENSMUSG00000067578	ENSMUSG00000031842
	ENSMUSG00000067878	ENSMUSG00000031843
	ENSMUSG00000067889	ENSMUSG00000031848
	ENSMUSG00000069302	ENSMUSG00000031853
	ENSMUSG00000069920	ENSMUSG00000031861
	ENSMUSG00000070000	ENSMUSG00000031870
	ENSMUSG00000070044	ENSMUSG00000031875
	ENSMUSG00000070576	ENSMUSG00000031879
	ENSMUSG00000070980	ENSMUSG00000031906
	ENSMUSG00000071341	ENSMUSG00000031952
	ENSMUSG00000071632	ENSMUSG00000031953
	ENSMUSG00000071715	ENSMUSG00000031958
	ENSMUSG00000073805	ENSMUSG00000031959
	ENSMUSG00000074194	ENSMUSG00000031970
	ENSMUSG00000074277	ENSMUSG00000031971
	ENSMUSG00000074622	ENSMUSG00000031983
	ENSMUSG00000074647	ENSMUSG00000031985
	ENSMUSG00000074652	ENSMUSG00000032192
	ENSMUSG00000074653	ENSMUSG00000032477
	ENSMUSG00000074676	ENSMUSG00000032482
	ENSMUSG00000074916	ENSMUSG00000032548
	ENSMUSG00000074923	ENSMUSG00000032558
	ENSMUSG00000074971	ENSMUSG00000032854
	ENSMUSG00000075023	ENSMUSG00000032899
	ENSMUSG00000075592	ENSMUSG00000033083
	ENSMUSG00000078566	ENSMUSG00000033249
	ENSMUSG00000079056	ENSMUSG00000033308
	ENSMUSG00000085795	ENSMUSG00000033491
	ENSMUSG00000086596	ENSMUSG00000033510
	ENSMUSG00000086841	ENSMUSG00000034116
	ENSMUSG00000087165	ENSMUSG00000034177
	ENSMUSG00000087259	ENSMUSG00000034255
	ENSMUSG00000087408	ENSMUSG00000034330
	ENSMUSG00000089669	ENSMUSG00000034413
	ENSMUSG00000090191	ENSMUSG00000034472
	ENSMUSG00000090206	ENSMUSG00000034488
	ENSMUSG00000092212	ENSMUSG00000034518
	ENSMUSG00000094443	ENSMUSG00000034687
	ENSMUSG00000094595	ENSMUSG00000034848
	ENSMUSG00000095115	ENSMUSG00000034891
	ENSMUSG00000096188	ENSMUSG00000035105
	ENSMUSG00000096856	ENSMUSG00000035131
	ENSMUSG00000097195	ENSMUSG00000035183
	ENSMUSG00000097393	ENSMUSG00000035200
	ENSMUSG00000099759	ENSMUSG00000035299
	ENSMUSG00000102428	ENSMUSG00000035557
	ENSMUSG00000103472	ENSMUSG00000035569
	ENSMUSG00000104445	ENSMUSG00000035629
		ENSMUSG00000035799
		ENSMUSG00000035873
		ENSMUSG00000036009
		ENSMUSG00000036103
		ENSMUSG00000036256
		ENSMUSG00000036273
		ENSMUSG00000036298
		ENSMUSG00000036306
		ENSMUSG00000036466
		ENSMUSG00000036560
		ENSMUSG00000036598
		ENSMUSG00000036622
		ENSMUSG00000036766
		ENSMUSG00000036782
		ENSMUSG00000036834
		ENSMUSG00000036892
		ENSMUSG00000036913
		ENSMUSG00000036934
		ENSMUSG00000036990
		ENSMUSG00000037025
		ENSMUSG00000037085
		ENSMUSG00000037166
		ENSMUSG00000037455
		ENSMUSG00000037463
		ENSMUSG00000037492
		ENSMUSG00000037605
		ENSMUSG00000037826
		ENSMUSG00000037892
		ENSMUSG00000037940
		ENSMUSG00000037999
		ENSMUSG00000038011
		ENSMUSG00000038065
		ENSMUSG00000038069
		ENSMUSG00000038147
		ENSMUSG00000038151
		ENSMUSG00000038155
		ENSMUSG00000038156
		ENSMUSG00000038167
		ENSMUSG00000038214
		ENSMUSG00000038239
		ENSMUSG00000038296
		ENSMUSG00000038368
		ENSMUSG00000038508
		ENSMUSG00000038521
		ENSMUSG00000038527
		ENSMUSG00000038718
		ENSMUSG00000038745
		ENSMUSG00000038859
		ENSMUSG00000038872
		ENSMUSG00000038884
		ENSMUSG00000038967
		ENSMUSG00000039114
		ENSMUSG00000039208
		ENSMUSG00000039396
		ENSMUSG00000039470
		ENSMUSG00000039478
		ENSMUSG00000039481
		ENSMUSG00000039620
		ENSMUSG00000039633
		ENSMUSG00000039648
		ENSMUSG00000039661
		ENSMUSG00000039683
		ENSMUSG00000039747
		ENSMUSG00000039838
		ENSMUSG00000039943
		ENSMUSG00000039960
		ENSMUSG00000039963
		ENSMUSG00000039989
		ENSMUSG00000040010
		ENSMUSG00000040037
		ENSMUSG00000040231
		ENSMUSG00000040258
		ENSMUSG00000040263
		ENSMUSG00000040322
		ENSMUSG00000040624
		ENSMUSG00000040653
		ENSMUSG00000040694
		ENSMUSG00000040726
		ENSMUSG00000040751
		ENSMUSG00000040867
		ENSMUSG00000040875
		ENSMUSG00000040969
		ENSMUSG00000040990
		ENSMUSG00000041046
		ENSMUSG00000041112
		ENSMUSG00000041309
		ENSMUSG00000041324
		ENSMUSG00000041440
		ENSMUSG00000041609
		ENSMUSG00000041624
		ENSMUSG00000041741
		ENSMUSG00000041831
		ENSMUSG00000041912
		ENSMUSG00000041949
		ENSMUSG00000042105
		ENSMUSG00000042284
		ENSMUSG00000042379
		ENSMUSG00000042699
		ENSMUSG00000042705
		ENSMUSG00000042766
		ENSMUSG00000042918
		ENSMUSG00000042942
		ENSMUSG00000043068
		ENSMUSG00000043391
		ENSMUSG00000043441
		ENSMUSG00000043668
		ENSMUSG00000043753
		ENSMUSG00000043857
		ENSMUSG00000044349
		ENSMUSG00000044367
		ENSMUSG00000044468
		ENSMUSG00000044719
		ENSMUSG00000044934
		ENSMUSG00000045034
		ENSMUSG00000045083
		ENSMUSG00000045092
		ENSMUSG00000045248
		ENSMUSG00000045871
		ENSMUSG00000045912
		ENSMUSG00000046204
		ENSMUSG00000046314
		ENSMUSG00000046442
		ENSMUSG00000046618
		ENSMUSG00000046718
		ENSMUSG00000046844
		ENSMUSG00000046999
		ENSMUSG00000047022
		ENSMUSG00000047414
		ENSMUSG00000047591
		ENSMUSG00000047747
		ENSMUSG00000047986
		ENSMUSG00000048070
		ENSMUSG00000048120
		ENSMUSG00000048148
		ENSMUSG00000048163
		ENSMUSG00000048371
		ENSMUSG00000048388
		ENSMUSG00000048752
		ENSMUSG00000048782
		ENSMUSG00000048978
		ENSMUSG00000049036
		ENSMUSG00000049382
		ENSMUSG00000049493
		ENSMUSG00000049511
		ENSMUSG00000049551
		ENSMUSG00000049556
		ENSMUSG00000049676
		ENSMUSG00000049687
		ENSMUSG00000049721
		ENSMUSG00000049848
		ENSMUSG00000049871
		ENSMUSG00000049929
		ENSMUSG00000050010
		ENSMUSG00000050035
		ENSMUSG00000050271
		ENSMUSG00000050288
		ENSMUSG00000050295
		ENSMUSG00000050315
		ENSMUSG00000050447
		ENSMUSG00000050549
		ENSMUSG00000050762
		ENSMUSG00000050966
		ENSMUSG00000052117
		ENSMUSG00000052397
		ENSMUSG00000052407
		ENSMUSG00000052504
		ENSMUSG00000052516
		ENSMUSG00000052557
		ENSMUSG00000052906
		ENSMUSG00000052917
		ENSMUSG00000052920
		ENSMUSG00000052997
		ENSMUSG00000053030
		ENSMUSG00000053062
		ENSMUSG00000053216
		ENSMUSG00000053226
		ENSMUSG00000053626
		ENSMUSG00000054065
		ENSMUSG00000054162
		ENSMUSG00000054426
		ENSMUSG00000054555
		ENSMUSG00000054580
		ENSMUSG00000054648
		ENSMUSG00000054753
		ENSMUSG00000054871
		ENSMUSG00000054889
		ENSMUSG00000055202
		ENSMUSG00000055254
		ENSMUSG00000055373
		ENSMUSG00000055493
		ENSMUSG00000055809
		ENSMUSG00000055835
		ENSMUSG00000055978
		ENSMUSG00000056130
		ENSMUSG00000056436
		ENSMUSG00000056608
		ENSMUSG00000056738
		ENSMUSG00000056900
		ENSMUSG00000056972
		ENSMUSG00000057228
		ENSMUSG00000057234
		ENSMUSG00000057315
		ENSMUSG00000057454
		ENSMUSG00000058056
		ENSMUSG00000058317
		ENSMUSG00000058571
		ENSMUSG00000058624
		ENSMUSG00000058715
		ENSMUSG00000058741
		ENSMUSG00000059326
		ENSMUSG00000060499
		ENSMUSG00000061410
		ENSMUSG00000061979
		ENSMUSG00000062064
		ENSMUSG00000062151
		ENSMUSG00000062380
		ENSMUSG00000063049
		ENSMUSG00000063488
		ENSMUSG00000064247
		ENSMUSG00000064329
		ENSMUSG00000066152
		ENSMUSG00000066952
		ENSMUSG00000068762
		ENSMUSG00000069171
		ENSMUSG00000069302
		ENSMUSG00000069835
		ENSMUSG00000070000
		ENSMUSG00000071078
		ENSMUSG00000071665
		ENSMUSG00000072235
		ENSMUSG00000072772
		ENSMUSG00000073000
		ENSMUSG00000073406
		ENSMUSG00000073968
		ENSMUSG00000074136
		ENSMUSG00000074277
		ENSMUSG00000074340
		ENSMUSG00000074622
		ENSMUSG00000074653
		ENSMUSG00000074682
		ENSMUSG00000074971
		ENSMUSG00000074994
		ENSMUSG00000075592
		ENSMUSG00000078234
		ENSMUSG00000078640
		ENSMUSG00000078922
		ENSMUSG00000079012
		ENSMUSG00000079022
		ENSMUSG00000079038
		ENSMUSG00000079197
		ENSMUSG00000084941
		ENSMUSG00000085396
		ENSMUSG00000085622
		ENSMUSG00000086290
		ENSMUSG00000086370
		ENSMUSG00000086930
		ENSMUSG00000090693
		ENSMUSG00000091002
		ENSMUSG00000091779
		ENSMUSG00000093904
		ENSMUSG00000094443
		ENSMUSG00000095026
		ENSMUSG00000096188
		ENSMUSG00000097393
		ENSMUSG00000097574
		ENSMUSG00000097767
		ENSMUSG00000098318

## Sheet: Supplementary Table 2h
Chr	Start	End
chr1	3670315	3672667
chr1	4491528	4493916
chr1	4571239	4572073
chr1	4784963	4786028
chr1	4802544	4803540
chr1	4807361	4808771
chr1	4851489	4852343
chr1	4854674	4856703
chr1	4857102	4858889
chr1	4865590	4866901
chr1	5017912	5020861
chr1	5022431	5023904
chr1	5070157	5070894
chr1	5082838	5083710
chr1	5588315	5589319
chr1	5915963	5917966
chr1	6213919	6215718
chr1	6358894	6359782
chr1	6448796	6449565
chr1	7087753	7090047
chr1	7206237	7207133
chr1	7397416	7398636
chr1	9299206	9300147
chr1	9469180	9470360
chr1	9544868	9545608
chr1	9547999	9549163
chr1	9699430	9701310
chr1	9747293	9748896
chr1	9768453	9769225
chr1	9797873	9798875
chr1	9848178	9848746
chr1	9938612	9940332
chr1	9940770	9941871
chr1	9942622	9943235
chr1	9943657	9944759
chr1	9966890	9968412
chr1	10008531	10009912
chr1	10031347	10032316
chr1	10037096	10038343
chr1	10039387	10040400
chr1	10231791	10233546
chr1	10993210	10994023
chr1	11329222	11330538
chr1	11395434	11396366
chr1	11400864	11401593
chr1	11413709	11414859
chr1	12691857	12692754
chr1	12711189	12712154
chr1	12717867	12718738
chr1	12744565	12745468
chr1	12833601	12835397
chr1	12835772	12836896
chr1	12864911	12865642
chr1	12989748	12993431
chr1	13052093	13052561
chr1	13067051	13068035
chr1	13084623	13085671
chr1	13103803	13104956
chr1	13125483	13127669
chr1	13143894	13144775
chr1	13371831	13374860
chr1	13588979	13590397
chr1	13659852	13660981
chr1	14309620	14310364
chr1	14506234	14507358
chr1	14755152	14756357
chr1	15286317	15287803
chr1	15791054	15792161
chr1	15804868	15806818
chr1	15891712	15893104
chr1	16092754	16093880
chr1	16097771	16098697
chr1	16103616	16106637
chr1	16129896	16130622
chr1	16518372	16519595
chr1	16519689	16520455
chr1	16618422	16619910
chr1	16639849	16641555
chr1	16656133	16657811
chr1	16665007	16665936
chr1	16688376	16689050
chr1	16823929	16824580
chr1	17096584	17098314
chr1	17145280	17145979
chr1	17250456	17251447
chr1	17727087	17727930
chr1	18057810	18059016
chr1	20786715	20787793
chr1	20791208	20801591
chr1	20803010	20804429
chr1	20804589	20805395
chr1	20806909	20808806
chr1	20809257	20810890
chr1	20811473	20812742
chr1	20812907	20813966
chr1	20819908	20820807
chr1	20867347	20868680
chr1	20890024	20892064
chr1	20951044	20952189
chr1	21078441	21079915
chr1	21080249	21081075
chr1	21165966	21166915
chr1	21218363	21218982
chr1	21256144	21257202
chr1	21271412	21272433
chr1	21960639	21962377
chr1	22532993	22534321
chr1	22805196	22806647
chr1	23255802	23257287
chr1	23382500	23383938
chr1	23761383	23763605
chr1	23921428	23922711
chr1	23934787	23935588
chr1	24005144	24005910
chr1	24099550	24100920
chr1	24586477	24587434
chr1	24678161	24679478
chr1	25829674	25831192
chr1	30804541	30805165
chr1	30832714	30833157
chr1	30847239	30848255
chr1	30872620	30874302
chr1	30948355	30950575
chr1	32172221	32173303
chr1	33271342	33272146
chr1	33555369	33556700
chr1	33565494	33566489
chr1	33621881	33622361
chr1	33635834	33637239
chr1	33637563	33638411
chr1	33669342	33670881
chr1	33714877	33715598
chr1	33719471	33720712
chr1	33732858	33733594
chr1	33736610	33737329
chr1	33738626	33739765
chr1	33741672	33742271
chr1	33742586	33743489
chr1	33747555	33748426
chr1	33748839	33749617
chr1	33756841	33759126
chr1	33813440	33815528
chr1	33903378	33904001
chr1	33906817	33908838
chr1	33909186	33909845
chr1	33914255	33914847
chr1	33943845	33944255
chr1	33944821	33945694
chr1	33964074	33965310
chr1	33966105	33967038
chr1	33968994	33969772
chr1	33974318	33975059
chr1	34005134	34008026
chr1	34010748	34012456
chr1	34038338	34039000
chr1	34040643	34041797
chr1	34060475	34061547
chr1	34067638	34068970
chr1	34070086	34070878
chr1	34073034	34075294
chr1	34076845	34077790
chr1	34093560	34094608
chr1	34102669	34104416
chr1	34104918	34105334
chr1	34106715	34107653
chr1	34107929	34110514
chr1	34110898	34111605
chr1	34138961	34140803
chr1	34144450	34145765
chr1	34164075	34165371
chr1	34177364	34178790
chr1	34179225	34179931
chr1	34189482	34190580
chr1	34192092	34192558
chr1	34236060	34236990
chr1	34246262	34246842
chr1	34270782	34271362
chr1	34292639	34293734
chr1	34302395	34303127
chr1	34432530	34433674
chr1	34433736	34434614
chr1	34434717	34435499
chr1	34438939	34440642
chr1	34443149	34444810
chr1	34450766	34451963
chr1	34459017	34460515
chr1	34462559	34463934
chr1	34467894	34468843
chr1	34471298	34473482
chr1	34485263	34486245
chr1	34497964	34498719
chr1	34536521	34537491
chr1	34578805	34580384
chr1	34642355	34643064
chr1	34677716	34679016
chr1	34749014	34751322
chr1	34801302	34802854
chr1	34805614	34807475
chr1	34811347	34812628
chr1	34842163	34843898
chr1	35697884	35698475
chr1	35869613	35870155
chr1	36003455	36004486
chr1	36013344	36014638
chr1	36017124	36017543
chr1	36018155	36019082
chr1	36059729	36062634
chr1	36062707	36063944
chr1	36064103	36066162
chr1	36067832	36069937
chr1	36073872	36074818
chr1	36075754	36077346
chr1	36079538	36080725
chr1	36083929	36085087
chr1	36087358	36091800
chr1	36092996	36094678
chr1	36094932	36096288
chr1	36097883	36099254
chr1	36102955	36105810
chr1	36135420	36137181
chr1	36137709	36138541
chr1	36139516	36140988
chr1	36143206	36144808
chr1	36154113	36155142
chr1	36239436	36240996
chr1	36243542	36244665
chr1	36251203	36252241
chr1	36254251	36255934
chr1	36261014	36261663
chr1	36269093	36270072
chr1	36271091	36272078
chr1	36272185	36274046
chr1	36277180	36278134
chr1	36279139	36279754
chr1	36296165	36296688
chr1	36303277	36303745
chr1	36307030	36308274
chr1	36314292	36318634
chr1	36321445	36322847
chr1	36325345	36326684
chr1	36368512	36369711
chr1	36414998	36415892
chr1	36416835	36418289
chr1	36444257	36445950
chr1	36467647	36468426
chr1	36470633	36472392
chr1	36492348	36493687
chr1	36499179	36499810
chr1	36501006	36502074
chr1	36506978	36508068
chr1	36511165	36513451
chr1	36514532	36515214
chr1	36518185	36519442
chr1	36520929	36523258
chr1	36529889	36534565
chr1	36545511	36547911
chr1	36551998	36553264
chr1	36555016	36559201
chr1	36560483	36561723
chr1	36567696	36570729
chr1	36579773	36581917
chr1	36583262	36584143
chr1	36588278	36589156
chr1	36589570	36590315
chr1	36596006	36596611
chr1	36630551	36631914
chr1	36634907	36635460
chr1	36643956	36645153
chr1	36660326	36661181
chr1	36665191	36666119
chr1	36672908	36673968
chr1	36682213	36684808
chr1	36690989	36692428
chr1	36698081	36699378
chr1	36706899	36710607
chr1	36744344	36745053
chr1	36770532	36772890
chr1	36778568	36779936
chr1	36782112	36783531
chr1	36784497	36786507
chr1	36789041	36790938
chr1	36791378	36792405
chr1	36804206	36805233
chr1	36805713	36807515
chr1	36830649	36831864
chr1	36834201	36835020
chr1	36844986	36845604
chr1	36854115	36854723
chr1	36856891	36857444
chr1	36864413	36865388
chr1	36902633	36903298
chr1	36938832	36940394
chr1	36943344	36944205
chr1	36982001	36983047
chr1	36983294	36988206
chr1	36988393	36989302
chr1	37028992	37029710
chr1	37101171	37102261
chr1	37218473	37219036
chr1	37299517	37300817
chr1	37401430	37402770
chr1	37409680	37410632
chr1	37412564	37413406
chr1	37419147	37420036
chr1	37429250	37430819
chr1	37540118	37541639
chr1	37623726	37624816
chr1	37635776	37636154
chr1	37638879	37639762
chr1	37670057	37670944
chr1	37674666	37676264
chr1	37678180	37678765
chr1	37687608	37688177
chr1	37719197	37720338
chr1	37864372	37865777
chr1	37871587	37872921
chr1	37889201	37890773
chr1	37931581	37932300
chr1	37965329	37966260
chr1	37985728	37986813
chr1	37996473	37998752
chr1	38031283	38032513
chr1	38049560	38050901
chr1	38058305	38059029
chr1	38069487	38070205
chr1	38088041	38088691
chr1	38128311	38130457
chr1	38131125	38131672
chr1	38132175	38133387
chr1	38209534	38210485
chr1	38626352	38628831
chr1	38770080	38770891
chr1	38823664	38824424
chr1	38835199	38837037
chr1	38868807	38870460
chr1	38897088	38898318
chr1	38986846	38988340
chr1	39192295	39195275
chr1	39335672	39336265
chr1	39361525	39362896
chr1	39367358	39368747
chr1	39371984	39372818
chr1	39373170	39373818
chr1	39373941	39375658
chr1	39390741	39391612
chr1	39456323	39456801
chr1	39477387	39479143
chr1	39526556	39527982
chr1	39534655	39536492
chr1	39576149	39578093
chr1	39650423	39651425
chr1	39720663	39721561
chr1	39761231	39762159
chr1	39859211	39859778
chr1	39869052	39870388
chr1	39900032	39902019
chr1	39902504	39903338
chr1	39922680	39924010
chr1	39936264	39936756
chr1	39949912	39950622
chr1	39958734	39960028
chr1	40000065	40001419
chr1	40002178	40003005
chr1	40030277	40031570
chr1	40055171	40056034
chr1	40057032	40057691
chr1	40085584	40086213
chr1	40265936	40267063
chr1	40325170	40326649
chr1	40680171	40682440
chr1	40790200	40790950
chr1	41390222	41390828
chr1	42695504	42698828
chr1	42713047	42714913
chr1	42850670	42851735
chr1	42888024	42889103
chr1	42952534	42953686
chr1	43091874	43093335
chr1	43098019	43099328
chr1	43139522	43140229
chr1	43163486	43164626
chr1	43167854	43168545
chr1	43444857	43447108
chr1	43570639	43571747
chr1	43730240	43731303
chr1	43826624	43828479
chr1	43898865	43900312
chr1	43933335	43934808
chr1	43964128	43964786
chr1	44034771	44035963
chr1	44101677	44102855
chr1	44118097	44120366
chr1	44147379	44148796
chr1	44173221	44174305
chr1	44198253	44199100
chr1	44551389	44552787
chr1	45794831	45795919
chr1	45925303	45926727
chr1	46066471	46067166
chr1	46425394	46425868
chr1	46852480	46854406
chr1	50926785	50928278
chr1	51477211	51479136
chr1	51536020	51536957
chr1	51747477	51748126
chr1	51879317	51880111
chr1	51914930	51916550
chr1	52007777	52009319
chr1	52113129	52114112
chr1	52118900	52120143
chr1	52170246	52171793
chr1	52174232	52174952
chr1	52231893	52233887
chr1	52499381	52501146
chr1	52630307	52631238
chr1	52726098	52727795
chr1	52816721	52818141
chr1	52844354	52846126
chr1	52927577	52928156
chr1	52952117	52954225
chr1	53296590	53297574
chr1	53313275	53314096
chr1	53352245	53352891
chr1	53706256	53707077
chr1	53751010	53751540
chr1	53784297	53785882
chr1	53823484	53824392
chr1	54193882	54195401
chr1	54249982	54251539
chr1	54438540	54439289
chr1	54484581	54485575
chr1	54556869	54558301
chr1	54925510	54926980
chr1	54979315	54979790
chr1	54983045	54984092
chr1	54993033	54994083
chr1	55026322	55027899
chr1	55029811	55030464
chr1	55052062	55053751
chr1	55070567	55071540
chr1	55075485	55077827
chr1	55079073	55079923
chr1	55086459	55089379
chr1	55102654	55103675
chr1	55106687	55107767
chr1	55108376	55109928
chr1	55130772	55132011
chr1	55162717	55164414
chr1	55198505	55199368
chr1	55201618	55203053
chr1	55236636	55237961
chr1	55362413	55364197
chr1	55405260	55407214
chr1	56969228	56970214
chr1	56971996	56973984
chr1	56976013	56976841
chr1	56977075	56978380
chr1	57205374	57205860
chr1	57376975	57378446
chr1	57405831	57407530
chr1	57773763	57775831
chr1	57969286	57970453
chr1	57995641	57996796
chr1	58029038	58030858
chr1	58031017	58031623
chr1	58366487	58367400
chr1	58382450	58383197
chr1	58391174	58392172
chr1	58392326	58394403
chr1	58395911	58396954
chr1	58397294	58398264
chr1	58400420	58402233
chr1	58402366	58403415
chr1	58403616	58405178
chr1	58406471	58411720
chr1	58412180	58415039
chr1	58415843	58417271
chr1	58417637	58419361
chr1	58421007	58422240
chr1	58423301	58425517
chr1	58443768	58445934
chr1	58448220	58449255
chr1	58456580	58458169
chr1	58461038	58462439
chr1	58462534	58463406
chr1	58484432	58485082
chr1	58503261	58506028
chr1	58534127	58534767
chr1	58585691	58586834
chr1	58711103	58711940
chr1	58712239	58712826
chr1	58746719	58747546
chr1	58761322	58762020
chr1	58795226	58796122
chr1	58802316	58803149
chr1	58972853	58974437
chr1	59070696	59072120
chr1	59119474	59120689
chr1	59162560	59163771
chr1	59236480	59238497
chr1	59256210	59257241
chr1	59315174	59315629
chr1	59367711	59368440
chr1	59375823	59377911
chr1	59421896	59424056
chr1	59426329	59427555
chr1	59447524	59449858
chr1	59472101	59474477
chr1	59480680	59485586
chr1	59487039	59488128
chr1	59508309	59509144
chr1	59515886	59517170
chr1	59523237	59524658
chr1	59584592	59584992
chr1	59591359	59592737
chr1	59603697	59604418
chr1	59605939	59607637
chr1	59613248	59614499
chr1	59629118	59629695
chr1	59659736	59661494
chr1	59668393	59669175
chr1	59669729	59671970
chr1	59683906	59684355
chr1	59684834	59687058
chr1	59687409	59688129
chr1	59689309	59690124
chr1	59693163	59694945
chr1	59695371	59695967
chr1	59696638	59699882
chr1	59700268	59701048
chr1	59701184	59701738
chr1	59711509	59712215
chr1	59714518	59723958
chr1	59724234	59726671
chr1	59727656	59731039
chr1	59731742	59733288
chr1	59733871	59734909
chr1	59738782	59740132
chr1	59749123	59750393
chr1	59762161	59765116
chr1	59912459	59914181
chr1	59926229	59926952
chr1	60007348	60008208
chr1	60042211	60043705
chr1	60054417	60055226
chr1	60076272	60077112
chr1	60097406	60098915
chr1	60179833	60181315
chr1	60342406	60344388
chr1	60408828	60410438
chr1	60428531	60429221
chr1	60432216	60433052
chr1	60565175	60567804
chr1	60822826	60823527
chr1	60852655	60854298
chr1	61638367	61640164
chr1	62181421	62182264
chr1	62398072	62398986
chr1	62701120	62701823
chr1	62702791	62704175
chr1	62704714	62708610
chr1	62736110	62737782
chr1	62738009	62738704
chr1	62741926	62743706
chr1	62766247	62768553
chr1	62772161	62772820
chr1	62782569	62784765
chr1	62793824	62795130
chr1	62795358	62796329
chr1	63057567	63059141
chr1	63085642	63086277
chr1	63089884	63090685
chr1	63091759	63092520
chr1	63107590	63109417
chr1	63109659	63111147
chr1	63112709	63114968
chr1	63115172	63116383
chr1	63123326	63124767
chr1	63130020	63130947
chr1	63131597	63132358
chr1	63134450	63135368
chr1	63136269	63140544
chr1	63175735	63179079
chr1	63179890	63181945
chr1	63182060	63184076
chr1	63199214	63200880
chr1	63203141	63205049
chr1	63209807	63210677
chr1	63213806	63214436
chr1	63218946	63219684
chr1	63222748	63223557
chr1	63225888	63226283
chr1	63236855	63237768
chr1	63238936	63240141
chr1	63246891	63248953
chr1	63256779	63257884
chr1	63263330	63264188
chr1	63272178	63274187
chr1	63302558	63304145
chr1	63307752	63309243
chr1	63309357	63310210
chr1	63440902	63442995
chr1	63444830	63446922
chr1	63609644	63610265
chr1	63614156	63615154
chr1	63667257	63667941
chr1	63729943	63731047
chr1	64115589	64116364
chr1	64120940	64122661
chr1	64225922	64226646
chr1	64305223	64306061
chr1	64531850	64533727
chr1	64578381	64578996
chr1	64615344	64616532
chr1	64616825	64618330
chr1	64649168	64650201
chr1	64689881	64691786
chr1	64717289	64718200
chr1	64732869	64733791
chr1	64734481	64739421
chr1	64956320	64957258
chr1	65109649	65110803
[truncated: 54,360 more rows]

## Sheet: Supplementary Table 2i
Chr	Start	End
[truncated: 47,857 more rows]
